# Supplementary material for: Comparison of phasor analysis and biexponential decay curve fitting of autofluorescence lifetime imaging data for machine learning prediction of cellular phenotypes
Source: Front Bioinform. 2023 Jun 29;3:1210157. doi: 10.3389/fbinf.2023.1210157 (PMC10342207; doi:10.3389/fbinf.2023.1210157)
Supplement: Supplementary file 1 [file Table2.XLSX]

## Sheet: Data Directory
Image Number	File Directory	Enzyme	Image Name	Group	Dish
1	C:\Linghao Hu\Project\Phasor Paper\Data\Macrophages\M0\	NADH	test_2022_05_05_14_11	M0	1
2	C:\Linghao Hu\Project\Phasor Paper\Data\Macrophages\M0\	FAD	test_2022_05_05_14_13	M0	1
3	C:\Linghao Hu\Project\Phasor Paper\Data\Macrophages\M0\	NADH	test_2022_05_05_14_16	M0	1
4	C:\Linghao Hu\Project\Phasor Paper\Data\Macrophages\M0\	FAD	test_2022_05_05_14_18	M0	1
5	C:\Linghao Hu\Project\Phasor Paper\Data\Macrophages\M0\	NADH	test_2022_05_05_14_20	M0	1
6	C:\Linghao Hu\Project\Phasor Paper\Data\Macrophages\M0\	FAD	test_2022_05_05_14_22	M0	1
7	C:\Linghao Hu\Project\Phasor Paper\Data\Macrophages\M0\	NADH	test_2022_05_05_14_24	M0	1
8	C:\Linghao Hu\Project\Phasor Paper\Data\Macrophages\M0\	FAD	test_2022_05_05_14_25	M0	1
9	C:\Linghao Hu\Project\Phasor Paper\Data\Macrophages\M0\	NADH	test_2022_05_05_14_27	M0	1
10	C:\Linghao Hu\Project\Phasor Paper\Data\Macrophages\M0\	FAD	test_2022_05_05_14_29	M0	1
11	C:\Linghao Hu\Project\Phasor Paper\Data\Macrophages\M0\	NADH	test_2022_05_05_14_31	M0	1
12	C:\Linghao Hu\Project\Phasor Paper\Data\Macrophages\M0\	FAD	test_2022_05_05_14_32	M0	1
13	C:\Linghao Hu\Project\Phasor Paper\Data\Macrophages\M0\	NADH	test_2022_05_05_14_35	M0	1
14	C:\Linghao Hu\Project\Phasor Paper\Data\Macrophages\M0\	FAD	test_2022_05_05_14_36	M0	1
15	C:\Linghao Hu\Project\Phasor Paper\Data\Macrophages\M0\	NADH	test_2022_05_05_14_38	M0	1
16	C:\Linghao Hu\Project\Phasor Paper\Data\Macrophages\M0\	FAD	test_2022_05_05_14_39	M0	1
17	C:\Linghao Hu\Project\Phasor Paper\Data\Macrophages\M0\	NADH	test_2022_05_05_14_45	M0	1
18	C:\Linghao Hu\Project\Phasor Paper\Data\Macrophages\M0\	FAD	test_2022_05_05_14_47	M0	1
19	C:\Linghao Hu\Project\Phasor Paper\Data\Macrophages\M0\	NADH	test_2022_05_05_14_52	M0	2
20	C:\Linghao Hu\Project\Phasor Paper\Data\Macrophages\M0\	FAD	test_2022_05_05_14_54	M0	2
21	C:\Linghao Hu\Project\Phasor Paper\Data\Macrophages\M0\	NADH	test_2022_05_05_14_56	M0	2
22	C:\Linghao Hu\Project\Phasor Paper\Data\Macrophages\M0\	FAD	test_2022_05_05_14_58	M0	2
23	C:\Linghao Hu\Project\Phasor Paper\Data\Macrophages\M0\	NADH	test_2022_05_05_15_00	M0	2
24	C:\Linghao Hu\Project\Phasor Paper\Data\Macrophages\M0\	FAD	test_2022_05_05_15_01	M0	2
25	C:\Linghao Hu\Project\Phasor Paper\Data\Macrophages\M0\	NADH	test_2022_05_05_15_03	M0	2
26	C:\Linghao Hu\Project\Phasor Paper\Data\Macrophages\M0\	FAD	test_2022_05_05_15_05	M0	2
27	C:\Linghao Hu\Project\Phasor Paper\Data\Macrophages\M0\	NADH	test_2022_05_05_15_07	M0	2
28	C:\Linghao Hu\Project\Phasor Paper\Data\Macrophages\M0\	FAD	test_2022_05_05_15_08	M0	2
29	C:\Linghao Hu\Project\Phasor Paper\Data\Macrophages\M0\	NADH	test_2022_05_05_15_11	M0	2
30	C:\Linghao Hu\Project\Phasor Paper\Data\Macrophages\M0\	FAD	test_2022_05_05_15_13	M0	2
31	C:\Linghao Hu\Project\Phasor Paper\Data\Macrophages\M0\	NADH	test_2022_05_05_15_15	M0	2
32	C:\Linghao Hu\Project\Phasor Paper\Data\Macrophages\M0\	FAD	test_2022_05_05_15_17	M0	2
33	C:\Linghao Hu\Project\Phasor Paper\Data\Macrophages\M0\	NADH	test_2022_05_05_15_19	M0	2
34	C:\Linghao Hu\Project\Phasor Paper\Data\Macrophages\M0\	FAD	test_2022_05_05_15_21	M0	2
35	C:\Linghao Hu\Project\Phasor Paper\Data\Macrophages\M0\	NADH	test_2022_05_05_15_31	M0	3
36	C:\Linghao Hu\Project\Phasor Paper\Data\Macrophages\M0\	FAD	test_2022_05_05_15_34	M0	3
37	C:\Linghao Hu\Project\Phasor Paper\Data\Macrophages\M0\	NADH	test_2022_05_05_15_44	M0	3
38	C:\Linghao Hu\Project\Phasor Paper\Data\Macrophages\M0\	FAD	test_2022_05_05_15_46	M0	3
39	C:\Linghao Hu\Project\Phasor Paper\Data\Macrophages\M0\	NADH	test_2022_05_05_15_47	M0	3
40	C:\Linghao Hu\Project\Phasor Paper\Data\Macrophages\M0\	FAD	test_2022_05_05_15_49	M0	3
41	C:\Linghao Hu\Project\Phasor Paper\Data\Macrophages\M0\	NADH	test_2022_05_05_15_56	M0	3
42	C:\Linghao Hu\Project\Phasor Paper\Data\Macrophages\M0\	FAD	test_2022_05_05_15_57	M0	3
43	C:\Linghao Hu\Project\Phasor Paper\Data\Macrophages\M0\	NADH	test_2022_05_05_15_59	M0	3
44	C:\Linghao Hu\Project\Phasor Paper\Data\Macrophages\M0\	FAD	test_2022_05_05_16_00	M0	3
45	C:\Linghao Hu\Project\Phasor Paper\Data\Macrophages\M0\	NADH	test_2022_05_05_16_02	M0	3
46	C:\Linghao Hu\Project\Phasor Paper\Data\Macrophages\M0\	FAD	test_2022_05_05_16_04	M0	3
47	C:\Linghao Hu\Project\Phasor Paper\Data\Macrophages\M1\	NADH	test_2022_05_06_17_07	M1	1
48	C:\Linghao Hu\Project\Phasor Paper\Data\Macrophages\M1\	FAD	test_2022_05_06_17_09	M1	1
49	C:\Linghao Hu\Project\Phasor Paper\Data\Macrophages\M1\	NADH	test_2022_05_06_17_11	M1	1
50	C:\Linghao Hu\Project\Phasor Paper\Data\Macrophages\M1\	FAD	test_2022_05_06_17_13	M1	1
51	C:\Linghao Hu\Project\Phasor Paper\Data\Macrophages\M1\	NADH	test_2022_05_06_17_15	M1	1
52	C:\Linghao Hu\Project\Phasor Paper\Data\Macrophages\M1\	FAD	test_2022_05_06_17_17	M1	1
53	C:\Linghao Hu\Project\Phasor Paper\Data\Macrophages\M1\	NADH	test_2022_05_06_17_19	M1	1
54	C:\Linghao Hu\Project\Phasor Paper\Data\Macrophages\M1\	FAD	test_2022_05_06_17_21	M1	1
55	C:\Linghao Hu\Project\Phasor Paper\Data\Macrophages\M1\	NADH	test_2022_05_06_17_25	M1	1
56	C:\Linghao Hu\Project\Phasor Paper\Data\Macrophages\M1\	FAD	test_2022_05_06_17_27	M1	1
57	C:\Linghao Hu\Project\Phasor Paper\Data\Macrophages\M1\	NADH	test_2022_05_06_17_30	M1	1
58	C:\Linghao Hu\Project\Phasor Paper\Data\Macrophages\M1\	FAD	test_2022_05_06_17_31	M1	1
59	C:\Linghao Hu\Project\Phasor Paper\Data\Macrophages\M1\	NADH	test_2022_05_06_17_34	M1	1
60	C:\Linghao Hu\Project\Phasor Paper\Data\Macrophages\M1\	FAD	test_2022_05_06_17_35	M1	1
61	C:\Linghao Hu\Project\Phasor Paper\Data\Macrophages\M1\	NADH	test_2022_05_06_17_38	M1	1
62	C:\Linghao Hu\Project\Phasor Paper\Data\Macrophages\M1\	FAD	test_2022_05_06_17_41	M1	1
63	C:\Linghao Hu\Project\Phasor Paper\Data\Macrophages\M1\	NADH	test_2022_05_06_17_47	M1	2
64	C:\Linghao Hu\Project\Phasor Paper\Data\Macrophages\M1\	FAD	test_2022_05_06_17_49	M1	2
65	C:\Linghao Hu\Project\Phasor Paper\Data\Macrophages\M1\	NADH	test_2022_05_06_17_52	M1	2
66	C:\Linghao Hu\Project\Phasor Paper\Data\Macrophages\M1\	FAD	test_2022_05_06_17_53	M1	2
67	C:\Linghao Hu\Project\Phasor Paper\Data\Macrophages\M1\	NADH	test_2022_05_06_17_56	M1	2
68	C:\Linghao Hu\Project\Phasor Paper\Data\Macrophages\M1\	FAD	test_2022_05_06_17_57	M1	2
69	C:\Linghao Hu\Project\Phasor Paper\Data\Macrophages\M1\	NADH	test_2022_05_06_18_04	M1	2
70	C:\Linghao Hu\Project\Phasor Paper\Data\Macrophages\M1\	FAD	test_2022_05_06_18_05	M1	2
71	C:\Linghao Hu\Project\Phasor Paper\Data\Macrophages\M1\	NADH	test_2022_05_06_18_08	M1	2
72	C:\Linghao Hu\Project\Phasor Paper\Data\Macrophages\M1\	FAD	test_2022_05_06_18_09	M1	2
73	C:\Linghao Hu\Project\Phasor Paper\Data\Macrophages\M1\	NADH	test_2022_05_06_18_12	M1	2
74	C:\Linghao Hu\Project\Phasor Paper\Data\Macrophages\M1\	FAD	test_2022_05_06_18_13	M1	2
75	C:\Linghao Hu\Project\Phasor Paper\Data\Macrophages\M1\	NADH	test_2022_05_06_18_16	M1	2
76	C:\Linghao Hu\Project\Phasor Paper\Data\Macrophages\M1\	FAD	test_2022_05_06_18_17	M1	2
77	C:\Linghao Hu\Project\Phasor Paper\Data\Macrophages\M1\	NADH	test_2022_05_06_18_23	M1	3
78	C:\Linghao Hu\Project\Phasor Paper\Data\Macrophages\M1\	FAD	test_2022_05_06_18_25	M1	3
79	C:\Linghao Hu\Project\Phasor Paper\Data\Macrophages\M1\	NADH	test_2022_05_06_18_31	M1	3
80	C:\Linghao Hu\Project\Phasor Paper\Data\Macrophages\M1\	FAD	test_2022_05_06_18_33	M1	3
81	C:\Linghao Hu\Project\Phasor Paper\Data\Macrophages\M1\	NADH	test_2022_05_06_18_35	M1	3
82	C:\Linghao Hu\Project\Phasor Paper\Data\Macrophages\M1\	FAD	test_2022_05_06_18_36	M1	3
83	C:\Linghao Hu\Project\Phasor Paper\Data\Macrophages\M1\	NADH	test_2022_05_06_18_38	M1	3
84	C:\Linghao Hu\Project\Phasor Paper\Data\Macrophages\M1\	FAD	test_2022_05_06_18_40	M1	3
85	C:\Linghao Hu\Project\Phasor Paper\Data\Macrophages\M1\	NADH	test_2022_05_06_18_42	M1	3
86	C:\Linghao Hu\Project\Phasor Paper\Data\Macrophages\M1\	FAD	test_2022_05_06_18_44	M1	3
87	C:\Linghao Hu\Project\Phasor Paper\Data\Macrophages\M1\	NADH	test_2022_05_06_18_53	M1	3
88	C:\Linghao Hu\Project\Phasor Paper\Data\Macrophages\M1\	FAD	test_2022_05_06_18_54	M1	3
89	C:\Linghao Hu\Project\Phasor Paper\Data\Macrophages\M1\	NADH	test_2022_05_06_18_57	M1	3
90	C:\Linghao Hu\Project\Phasor Paper\Data\Macrophages\M1\	FAD	test_2022_05_06_18_58	M1	3
91	C:\Linghao Hu\Project\Phasor Paper\Data\Macrophages\M2\	NADH	test_2022_05_06_14_53	M2	1
92	C:\Linghao Hu\Project\Phasor Paper\Data\Macrophages\M2\	FAD	test_2022_05_06_14_55	M2	1
93	C:\Linghao Hu\Project\Phasor Paper\Data\Macrophages\M2\	NADH	test_2022_05_06_14_58	M2	1
94	C:\Linghao Hu\Project\Phasor Paper\Data\Macrophages\M2\	FAD	test_2022_05_06_14_59	M2	1
95	C:\Linghao Hu\Project\Phasor Paper\Data\Macrophages\M2\	NADH	test_2022_05_06_15_02	M2	1
96	C:\Linghao Hu\Project\Phasor Paper\Data\Macrophages\M2\	FAD	test_2022_05_06_15_04	M2	1
97	C:\Linghao Hu\Project\Phasor Paper\Data\Macrophages\M2\	NADH	test_2022_05_06_15_06	M2	1
98	C:\Linghao Hu\Project\Phasor Paper\Data\Macrophages\M2\	FAD	test_2022_05_06_15_08	M2	1
99	C:\Linghao Hu\Project\Phasor Paper\Data\Macrophages\M2\	NADH	test_2022_05_06_15_11	M2	1
100	C:\Linghao Hu\Project\Phasor Paper\Data\Macrophages\M2\	FAD	test_2022_05_06_15_14	M2	1
101	C:\Linghao Hu\Project\Phasor Paper\Data\Macrophages\M2\	NADH	test_2022_05_06_15_18	M2	1
102	C:\Linghao Hu\Project\Phasor Paper\Data\Macrophages\M2\	FAD	test_2022_05_06_15_20	M2	1
103	C:\Linghao Hu\Project\Phasor Paper\Data\Macrophages\M2\	NADH	test_2022_05_06_15_23	M2	1
104	C:\Linghao Hu\Project\Phasor Paper\Data\Macrophages\M2\	FAD	test_2022_05_06_15_24	M2	1
105	C:\Linghao Hu\Project\Phasor Paper\Data\Macrophages\M2\	NADH	test_2022_05_06_15_28	M2	1
106	C:\Linghao Hu\Project\Phasor Paper\Data\Macrophages\M2\	FAD	test_2022_05_06_15_30	M2	1
107	C:\Linghao Hu\Project\Phasor Paper\Data\Macrophages\M2\	NADH	test_2022_05_06_15_37	M2	2
108	C:\Linghao Hu\Project\Phasor Paper\Data\Macrophages\M2\	FAD	test_2022_05_06_15_39	M2	2
109	C:\Linghao Hu\Project\Phasor Paper\Data\Macrophages\M2\	NADH	test_2022_05_06_15_41	M2	2
110	C:\Linghao Hu\Project\Phasor Paper\Data\Macrophages\M2\	FAD	test_2022_05_06_15_43	M2	2
111	C:\Linghao Hu\Project\Phasor Paper\Data\Macrophages\M2\	NADH	test_2022_05_06_15_45	M2	2
112	C:\Linghao Hu\Project\Phasor Paper\Data\Macrophages\M2\	FAD	test_2022_05_06_15_47	M2	2
113	C:\Linghao Hu\Project\Phasor Paper\Data\Macrophages\M2\	NADH	test_2022_05_06_15_51	M2	2
114	C:\Linghao Hu\Project\Phasor Paper\Data\Macrophages\M2\	FAD	test_2022_05_06_15_53	M2	2
115	C:\Linghao Hu\Project\Phasor Paper\Data\Macrophages\M2\	NADH	test_2022_05_06_15_56	M2	2
116	C:\Linghao Hu\Project\Phasor Paper\Data\Macrophages\M2\	FAD	test_2022_05_06_15_57	M2	2
117	C:\Linghao Hu\Project\Phasor Paper\Data\Macrophages\M2\	NADH	test_2022_05_06_16_04	M2	2
118	C:\Linghao Hu\Project\Phasor Paper\Data\Macrophages\M2\	FAD	test_2022_05_06_16_06	M2	2
119	C:\Linghao Hu\Project\Phasor Paper\Data\Macrophages\M2\	NADH	test_2022_05_06_16_08	M2	2
120	C:\Linghao Hu\Project\Phasor Paper\Data\Macrophages\M2\	FAD	test_2022_05_06_16_10	M2	2
121	C:\Linghao Hu\Project\Phasor Paper\Data\Macrophages\M2\	NADH	test_2022_05_06_16_20	M2	3
122	C:\Linghao Hu\Project\Phasor Paper\Data\Macrophages\M2\	FAD	test_2022_05_06_16_22	M2	3
123	C:\Linghao Hu\Project\Phasor Paper\Data\Macrophages\M2\	NADH	test_2022_05_06_16_24	M2	3
124	C:\Linghao Hu\Project\Phasor Paper\Data\Macrophages\M2\	FAD	test_2022_05_06_16_26	M2	3
125	C:\Linghao Hu\Project\Phasor Paper\Data\Macrophages\M2\	NADH	test_2022_05_06_16_28	M2	3
126	C:\Linghao Hu\Project\Phasor Paper\Data\Macrophages\M2\	FAD	test_2022_05_06_16_30	M2	3
127	C:\Linghao Hu\Project\Phasor Paper\Data\Macrophages\M2\	NADH	test_2022_05_06_16_32	M2	3
128	C:\Linghao Hu\Project\Phasor Paper\Data\Macrophages\M2\	FAD	test_2022_05_06_16_34	M2	3
129	C:\Linghao Hu\Project\Phasor Paper\Data\Macrophages\M2\	NADH	test_2022_05_06_16_36	M2	3
130	C:\Linghao Hu\Project\Phasor Paper\Data\Macrophages\M2\	FAD	test_2022_05_06_16_38	M2	3
131	C:\Linghao Hu\Project\Phasor Paper\Data\Macrophages\M2\	NADH	test_2022_05_06_16_44	M2	3
132	C:\Linghao Hu\Project\Phasor Paper\Data\Macrophages\M2\	FAD	test_2022_05_06_16_46	M2	3
133	C:\Linghao Hu\Project\Phasor Paper\Data\Macrophages\M2\	NADH	test_2022_05_06_16_52	M2	3
134	C:\Linghao Hu\Project\Phasor Paper\Data\Macrophages\M2\	FAD	test_2022_05_06_16_54	M2	3
135	C:\Linghao Hu\Project\Phasor Paper\Data\Macrophages\M2\	NADH	test_2022_05_06_16_56	M2	3
136	C:\Linghao Hu\Project\Phasor Paper\Data\Macrophages\M2\	FAD	test_2022_05_06_16_58	M2

## Sheet: M0
	NADH.Intensity	NADH.a1	NADH.t1	NADH.t2	NADH.FLIM	FAD.Intensity	FAD.a1	FAD.t1	FAD.t2	FAD.FLIM	Redox.Ratio	FLIRR	NADH.G	NADH.S	FAD.G	FAD.S
test_2022_05_05_14_11	212.036	0.80424	371.328	2647.28	807.049	112.294	0.68116	314.06	2741.58	1069.88	0.349159	0.290046	0.538329	0.37744	0.444905	0.439726
test_2022_05_05_14_13	219.758	0.774022	343.794	2593.83	847.626	97.3065	0.718323	223.728	2716.21	898.764	0.308869	0.317454	0.51297	0.392893	0.420122	0.43391
	153.254	0.791998	343.304	2488.1	779.53	61.2143	0.770742	204.639	2916.18	808.896	0.291576	0.270879	0.540218	0.379062	0.403448	0.426453
	204.004	0.790151	377.796	2485.14	806.516	86.9372	0.690589	281.841	2754.14	1030.75	0.314266	0.306903	0.542551	0.378145	0.425605	0.441772
	189	0.784333	376.462	2576.81	828.885	91.7542	0.697213	289.712	3013.65	1083.23	0.343467	0.313608	0.549191	0.379612	0.41436	0.431975
	170.345	0.771111	335.077	2515.95	814.795	90.7143	0.717354	295.542	2881.51	1004.05	0.349054	0.326605	0.5077	0.388421	0.413178	0.437915
	188.254	0.794628	354.677	2506.66	782.812	82.1985	0.684171	341.271	3190.86	1138.14	0.311819	0.306788	0.54603	0.376219	0.417295	0.439572
	166.785	0.811177	390.121	2840.52	838.73	83.1181	0.715706	299.616	3075.76	1050.66	0.342301	0.2647	0.539685	0.373619	0.406497	0.430081
	188.59	0.791804	409.595	2745.02	882.582	56.6872	0.727735	321.416	2937.58	1016.43	0.237715	0.289458	0.534132	0.3814	0.43031	0.429362
	238.218	0.780269	387.262	2605.75	864.254	96.9296	0.678645	313.167	2898.02	1101.02	0.297121	0.326649	0.524309	0.385383	0.427493	0.438968
	239.741	0.788826	386.684	2622.15	849.91	68.1897	0.759792	228.46	3037.7	884.353	0.234847	0.279943	0.54149	0.38231	0.411794	0.426876
	234.082	0.777353	396.88	2873.92	934.151	76.1592	0.709401	277.468	2835.3	988.744	0.250059	0.318504	0.493507	0.389072	0.415319	0.435616
	198.268	0.771242	396.103	2508.12	862.256	79.3913	0.689498	309.323	2845.09	1067.21	0.30007	0.336962	0.532864	0.385829	0.416284	0.439074
	208.382	0.824429	380.283	2593.97	762.094	90.5294	0.694881	309.619	2920.45	1081.7	0.305339	0.253577	0.563441	0.365717	0.431952	0.4367
	255.374	0.789826	306.765	2201.19	690.332	114.306	0.669722	385.167	2918.43	1199.91	0.327912	0.317993	0.556312	0.375163	0.428723	0.439376
	192.785	0.837431	375.756	2743.53	750.755	74.9154	0.66727	279.605	2380.03	963.42	0.283658	0.247976	0.578836	0.359476	0.447195	0.44296
	198.644	0.820717	380.104	2601.49	764.82	46.1379	0.767913	155.397	2872.64	764.727	0.195146	0.234906	0.57105	0.364227	0.41187	0.435391
	214.917	0.765067	355.067	2636.03	881.34	94.7051	0.69914	275.509	2869.84	1035.78	0.302689	0.341052	0.494711	0.393527	0.423984	0.434609
	207	0.828787	350.792	2339.98	684.435	55.0972	0.745003	225.865	2902.72	874.254	0.242615	0.235153	0.609386	0.358074	0.412685	0.431337
	228.347	0.802766	380.131	2574.3	804.163	59.6992	0.736019	220.794	2655.77	826.02	0.217175	0.272524	0.559278	0.376361	0.427127	0.434428
	227.496	0.796554	374.192	2390.39	766.868	68.6597	0.735988	276.126	2826.94	925.082	0.239444	0.277302	0.57528	0.372052	0.429011	0.426863
	260.5	0.802037	387.58	2580.58	818.673	62.1909	0.694463	278.018	2583.76	956.368	0.195883	0.288501	0.563472	0.371805	0.46201	0.436425
	226.535	0.790252	408.239	2804.62	894.829	59.3351	0.727576	260.076	2598.97	884.217	0.210133	0.293002	0.516551	0.384696	0.45857	0.431504
	231.788	0.805582	367.109	2577.72	785.933	54.18	0.742096	274.587	2927	933.874	0.192491	0.264942	0.553157	0.373897	0.423091	0.426109
	245.267	0.816035	359.192	2471.75	743.685	52.9	0.734851	341.664	3025.84	1008.47	0.190419	0.252262	0.57753	0.367604	0.44139	0.422678
	201.242	0.80894	343.35	2306.91	705.248	36.8022	0.808951	151.709	2911.26	643.537	0.167026	0.239484	0.60122	0.364669	0.406541	0.420044
	229.885	0.797044	406.117	2887.19	894.745	75.2595	0.729264	376.094	3046.05	1057.75	0.247064	0.27916	0.521182	0.379589	0.4553	0.420015
	232.818	0.80309	409.101	2848.13	874.632	67.6364	0.683123	292.119	2521.41	966.821	0.228315	0.291893	0.531982	0.377996	0.465713	0.434681
	253.385	0.798222	415.582	2858.56	897.474	63.8899	0.686891	398.128	2865.73	1138.17	0.209763	0.296382	0.527418	0.377557	0.449573	0.43603
	247.538	0.78696	406.318	2616.78	871.457	49.3846	0.75916	243.933	2888.21	858.521	0.182233	0.283446	0.518509	0.386999	0.435885	0.432369
	178.372	0.816473	396.162	2818.98	829.534	47.0583	0.759658	203.047	2928.59	829.603	0.218754	0.244917	0.561437	0.37099	0.416535	0.430955
	198.625	0.820358	395.496	2725.66	806.083	56.9625	0.712002	292.524	2820.92	1014.89	0.250929	0.253506	0.583364	0.368828	0.457748	0.434632
	181.508	0.787884	385.966	2503.83	822.972	56.2938	0.717535	276.788	2850.76	967.617	0.256349	0.300022	0.553798	0.382604	0.436445	0.430096
	177.713	0.807258	362.766	2608.21	772.099	42.5175	0.756149	248.855	2899.96	865.493	0.207106	0.256149	0.548407	0.372133	0.435734	0.42348
	175.662	0.780943	359.89	2644.39	844.037	48.5405	0.747183	332.983	3226.12	1017.24	0.230057	0.296034	0.507247	0.385873	0.431852	0.420089
	174.73	0.805325	368.824	2875.11	849.543	54.7189	0.728239	317.585	3012.33	1014.46	0.243556	0.271148	0.521568	0.377642	0.446056	0.423576
	211.511	0.793376	402.319	2790.19	883.077	44.8139	0.726925	274.093	2818.43	945.01	0.187404	0.28723	0.528226	0.382116	0.439265	0.433203
	174.852	0.77503	373.491	2769.56	895.48	60.1926	0.746933	282.412	2961.13	915.733	0.260239	0.305922	0.504741	0.389809	0.434244	0.423331
	175.944	0.799459	392.414	2588.18	821.226	32.1414	0.767627	198.189	2607.54	718.302	0.167935	0.26422	0.566893	0.373579	0.439861	0.4252
	164.766	0.80268	390.881	2843.21	858.932	44.1746	0.738117	243.984	2690.96	837.296	0.214245	0.272125	0.528552	0.37888	0.448149	0.42439
	207.909	0.783321	373.917	2548.26	832.958	35.2045	0.785579	213.921	2944.52	765.537	0.15644	0.278544	0.535629	0.383057	0.427571	0.420014
	214.294	0.794394	383.15	2675.24	843.312	58.9965	0.735802	278.057	2884.84	922.118	0.237959	0.282097	0.550395	0.379708	0.454407	0.422316
	206.459	0.801844	390.795	2614.74	818.277	45.5591	0.763482	261.478	2904.11	848.468	0.199954	0.262535	0.561748	0.372489	0.44032	0.415845
	216.319	0.794011	364.576	2528.39	804.77	40.7234	0.719829	395.219	2764.55	1010.71	0.168802	0.292507	0.540084	0.379569	0.463169	0.426338
	212.433	0.799885	437.398	3051.18	945.445	43.5556	0.739519	269.186	2781.08	882.489	0.180908	0.273671	0.519922	0.380215	0.460169	0.422185
	200.048	0.812688	343.68	2472.13	731.862	34.9157	0.7506	245.543	2816.59	844.062	0.157694	0.255064	0.576534	0.367892	0.441242	0.428126
	125.656	0.779786	429.02	2739.24	909.607	37.1483	0.759903	242.48	2973.04	851.86	0.241943	0.295291	0.5217	0.384054	0.42643	0.414024
	232.759	0.83297	393.275	2638.74	762.638	55.3976	0.773293	243.767	2760.15	794.25	0.198804	0.216362	0.580374	0.36272	0.483423	0.417706
	142.813	0.803451	420.743	2801.24	869.084	41.5953	0.726586	316.069	2728.68	949.254	0.22719	0.272571	0.536898	0.377819	0.473296	0.425869
	153.708	0.789162	423.786	2724.96	883.52	40.6	0.740662	249.954	2838.74	867.488	0.218685	0.286169	0.534919	0.382089	0.465437	0.427312
	216.15	0.828371	425.071	2922.28	846.461	55.729	0.760323	288.453	2899.52	870.559	0.207035	0.228162	0.561003	0.36827	0.469665	0.415355
	185.395	0.812287	417.641	2871.88	856.129	47.5978	0.751558	245.498	2635.85	804.9	0.207098	0.253616	0.548598	0.373976	0.482312	0.424304
	163.776	0.816764	424.607	2974.29	875.26	28.8503	0.778502	232.654	2880.41	767.381	0.162026	0.239906	0.55024	0.371474	0.441983	0.417282
	170.289	0.816474	435.097	3028.77	900.234	34.7631	0.76964	260.479	2781.36	797.487	0.175973	0.241087	0.544458	0.372849	0.458644	0.418318
	180.675	0.798127	450.103	2895.63	926.619	41.195	0.755623	273.15	2808.28	855.652	0.197842	0.269681	0.538726	0.381216	0.472815	0.421024
	178.317	0.8121	421.207	3017.08	889.841	29.8758	0.775974	266.599	2964.83	796.325	0.153522	0.249372	0.540693	0.373023	0.451449	0.404355
	146.702	0.7995	430.376	2875.8	889.503	21.2465	0.773708	258.774	2752.14	773.8	0.138684	0.26554	0.543634	0.374983	0.458369	0.412014
	147.594	0.801254	400.653	2750.42	847.072	29.4519	0.760285	296.159	2863.73	822.04	0.170344	0.267112	0.547745	0.376079	0.472163	0.414508
	149.658	0.807432	449.781	2992.95	918.878	29.1053	0.793829	207.279	2696.66	682.261	0.167271	0.244292	0.543653	0.377886	0.480392	0.409331
	124.543	0.799307	467.233	2941.54	940.706	32.3857	0.756545	328.539	2849.34	877.084	0.218192	0.269403	0.543587	0.379928	0.479082	0.411063
	123.29	0.808129	452.043	2971.03	923.68	28.7097	0.772855	260.189	2775.67	788.669	0.199967	0.25192	0.542169	0.378395	0.476021	0.413793
	139.851	0.795231	468.109	2921.74	916.799	22.5603	0.788082	255.666	2979.92	776.529	0.148096	0.262368	0.549249	0.374879	0.454352	0.412609
	126.886	0.801938	440.938	3009.03	915.345	26.1894	0.778182	227.101	2709.97	742.183	0.184527	0.256192	0.5406	0.375913	0.493963	0.417341
	96.9515	0.792246	422.997	2799.51	887.653	19.6408	0.812314	238.452	2658.71	642.079	0.169069	0.257984	0.547035	0.380508	0.523075	0.397995
	118.649	0.819033	528.967	3520.1	1042.92	22.7485	0.795349	273.603	2892.43	729.994	0.170135	0.234656	0.529652	0.378148	0.509044	0.403867
	91.5469	0.793061	430.286	2941.47	919.122	19.6562	0.790793	281.682	3040.75	801.615	0.193159	0.264297	0.554464	0.378721	0.483295	0.403833
	73.5806	0.767148	447.07	3295.76	1021.62	14.2903	0.771956	246.045	2993.33	700.722	0.157565	0.318175	0.501435	0.382325	0.539414	0.390115
	91.9926	0.815042	456.639	2964.47	900.826	15.9481	0.794605	245.143	2726.5	684.485	0.154296	0.235484	0.564432	0.373858	0.498868	0.406289
	87.5542	0.819861	503.908	3352.05	992.318	20.747	0.789029	298.856	3317.77	854.188	0.204464	0.231092	0.537278	0.373335	0.485362	0.409579
	71.8712	0.783137	448.643	3468.27	1071.5	17.6136	0.811914	307.696	3201.51	725.955	0.205715	0.273192	0.480811	0.38643	0.531926	0.38087
test_2022_05_05_14_16	133.253	0.805556	384.023	2819.74	840.487	55.3291	0.785051	166.511	2290.4	615.411	0.296489	0.248581	0.536422	0.374628	0.444314	0.468633
test_2022_05_05_14_18	166.51	0.791968	316.479	2120.97	681.229	55.4615	0.785821	184.094	2498.04	657.325	0.254812	0.265779	0.584288	0.371705	0.43023	0.464518
	265.715	0.795018	312.644	2162.58	682.851	106.731	0.743265	194.53	2510.64	778.038	0.293269	0.276159	0.584846	0.3718	0.409409	0.477965
	284.284	0.765282	387.167	2594.94	887.751	112.479	0.730134	206.654	2439.92	797.712	0.305353	0.322593	0.513785	0.390672	0.404595	0.474065
	178.364	0.784365	395.907	2810.42	897.793	76.9485	0.742157	191.279	2580.69	786.671	0.303705	0.293177	0.521947	0.382976	0.376764	0.475986
	211.35	0.802362	351.491	2352.78	738.872	60.1545	0.762018	148.13	2130.81	597.348	0.233863	0.260272	0.568865	0.373222	0.431125	0.471092
	211.342	0.804403	399.174	2761.16	849.566	75.0822	0.75463	157.093	2358.41	687.333	0.269044	0.26128	0.550274	0.374475	0.40384	0.481939
	208.228	0.788283	369.563	2467.93	800.06	75.0651	0.771508	174.96	2526.32	705.468	0.280716	0.276788	0.54794	0.378326	0.390162	0.471686
	136.749	0.795285	401.294	2708.53	846.083	42.7346	0.78098	171.027	2110.64	575.472	0.243254	0.26553	0.556997	0.375382	0.475368	0.464935
	242.764	0.797065	391.781	2564.86	814.606	78.9253	0.741364	176.792	2434.54	738.826	0.264924	0.277195	0.550951	0.376559	0.401049	0.479896
	251.542	0.794668	440.971	2677.82	891.073	90.8333	0.728247	210.234	2407.7	789.109	0.262193	0.282771	0.54387	0.382405	0.403843	0.476594
	162.751	0.800954	339.133	2464.28	745.858	35.9461	0.826418	112.226	2333.09	472.401	0.189948	0.243224	0.566424	0.373514	0.434251	0.464327
	226.76	0.783069	402.507	2608.88	867.792	76.1974	0.759261	201.631	2516.91	744.766	0.258571	0.286776	0.535116	0.383744	0.412476	0.470536
	170.962	0.799333	327.692	2458.48	730.63	41.3491	0.771406	151.927	2159.9	590.512	0.204374	0.263907	0.571077	0.371567	0.452994	0.475045
	227.151	0.770069	398.604	2708.01	914.289	80.4302	0.757616	187.22	2324.16	690.876	0.27156	0.306068	0.510464	0.389886	0.42242	0.472216
	228.218	0.789652	409.785	2651.31	867.855	79.5402	0.74225	227.986	2741.6	858.94	0.263393	0.28435	0.561621	0.381475	0.381756	0.468359
	234.606	0.778446	381.028	2450.72	822.394	66.9263	0.760241	186.1	2417.05	705.097	0.236586	0.29287	0.5463	0.381235	0.408014	0.47229
	230.916	0.797479	368.858	2547.78	800.585	75.2697	0.762762	195.397	2401.41	701.255	0.25031	0.266599	0.547249	0.376832	0.437943	0.470039
	178.805	0.786405	390.861	2769.76	890.21	50.9737	0.774017	159.588	2449.13	643.885	0.234294	0.278176	0.519434	0.385223	0.414481	0.473487
	165.359	0.819677	390.13	2749.22	811.806	58.2109	0.780574	164.985	2617.15	682.707	0.266757	0.231445	0.564718	0.370651	0.390993	0.468669
	215.971	0.803599	411.002	2672.4	846.667	63.6143	0.722087	234.17	2712.81	897.022	0.234063	0.274229	0.565976	0.378762	0.392125	0.477845
	206.787	0.750252	387.123	2726.83	952.642	91.4601	0.750253	199.079	2176.65	687.084	0.323927	0.333911	0.496234	0.397505	0.460294	0.473969
	171.319	0.760113	313.748	2253.42	766.098	278.557	0.742768	226.47	2165.6	714.119	0.603289	0.323813	0.52363	0.390918	0.484907	0.472418
	243.638	0.80595	346.98	2320.84	719.048	167.112	0.778524	206.302	2172.53	631.71	0.375826	0.250916	0.580469	0.368068	0.493331	0.459912
	164.277	0.774661	411.54	3037.6	981.54	44.7846	0.787166	219.169	2737.25	732.621	0.216127	0.287215	0.49095	0.388814	0.416441	0.460304
	207.76	0.797682	429.673	2829.77	896.792	83.9355	0.764769	198.233	2305.18	677.813	0.280012	0.265466	0.534354	0.38041	0.46274	0.469818
	140.911	0.798258	440.47	2845.74	915.644	39.7111	0.789652	202.834	2509.78	658.063	0.221622	0.257782	0.54073	0.381377	0.433022	0.456085
	183.295	0.802897	421.446	2991.47	905.286	51.3616	0.775383	156.028	2084.88	566.876	0.225827	0.256899	0.525199	0.377604	0.476366	0.465307
	149.125	0.809479	417.864	2937.96	881.496	36.6875	0.794682	145.723	2187.46	536.736	0.213233	0.240894	0.55083	0.372552	0.434539	0.462793
	194.385	0.811715	404.717	2826.28	840.38	41.4038	0.799955	176.452	2312.87	574.862	0.181446	0.236099	0.541544	0.370717	0.463083	0.45522
	163.424	0.790972	387.973	2627.22	835.091	35.8225	0.771678	182.343	2275.25	638.9	0.194452	0.27341	0.554906	0.3776	0.441554	0.46768
	198.735	0.803809	393.501	2575.89	815.268	41.8939	0.73391	190.561	2144.14	685.55	0.180351	0.268663	0.565955	0.374609	0.431911	0.475487
	117.053	0.785657	449.571	3085.45	992.836	35.4361	0.799067	135.039	2223.24	532.016	0.24205	0.269077	0.517683	0.386564	0.448532	0.465476
	213.191	0.839975	395.465	2755.45	766.704	40.9652	0.766539	213.004	2330.27	657.657	0.164321	0.212879	0.587403	0.358645	0.479008	0.463208
	212.435	0.807069	421.299	2737.64	853.227	43.7083	0.798424	168.379	2218.18	562.842	0.177909	0.243218	0.549585	0.37542	0.465942	0.459246
	131.956	0.796702	453.284	2895.7	921.808	34.1527	0.79635	181.906	2508.29	620.135	0.214115	0.257926	0.541652	0.378843	0.438405	0.453215
	180.444	0.793593	425.639	2973.98	916.465	43.321	0.78675	182.979	2321.35	617.641	0.208224	0.263232	0.520657	0.379828	0.461653	0.462643
	158.993	0.812755	392.297	2751.97	820.981	33.2509	0.809038	148.985	2367.19	544.455	0.181125	0.233869	0.569221	0.371368	0.446689	0.4617
	154.041	0.801729	459.975	3046.65	948.75	37.8427	0.781498	174.102	2265.16	604.153	0.204796	0.254732	0.532219	0.378663	0.457395	0.464228
	154.039	0.80006	431.782	3077.2	940.828	38.686	0.77863	214.519	2178.36	618.736	0.211419	0.26031	0.52029	0.377455	0.482759	0.458854
	129.917	0.81617	450.642	3249.35	935.214	26.9481	0.796815	168.219	2322.45	580.025	0.178043	0.23221	0.534057	0.372204	0.46765	0.46034
	166.343	0.805143	451.777	3013.81	932.027	36.0276	0.77686	178.171	2343.6	636.216	0.190832	0.252268	0.53349	0.377001	0.452204	0.468363
	121.734	0.773498	428.199	2792.25	935.608	38.9493	0.782133	219.975	2508.9	679.109	0.249835	0.292999	0.524918	0.386772	0.460364	0.460141
	157.268	0.789608	387.247	2639.33	841.384	34.9262	0.768758	239.091	2427.17	699.18	0.18398	0.277133	0.550122	0.380449	0.449163	0.456018
	146.723	0.795592	411.056	2796.01	868.013	32.6416	0.799294	149.291	2302.88	560.319	0.193416	0.257769	0.540315	0.375179	0.445937	0.461716
	116.592	0.799571	402.417	2579.8	807.086	36.3803	0.76192	176.266	2021.2	576.135	0.241735	0.264883	0.565315	0.37265	0.49817	0.461002
	144.153	0.789032	473.23	3031.15	991.816	47.7937	0.805646	180.42	2575.25	613.849	0.247711	0.264188	0.533256	0.386839	0.443362	0.45597
	140.231	0.834313	489.008	3460.44	947.028	36.1063	0.786886	187.884	2213.49	591.271	0.205414	0.212933	0.549765	0.366657	0.472133	0.460525
	122.341	0.792347	441.685	3074.72	950.108	28.7909	0.794759	209.027	2413.56	622.422	0.186051	0.261529	0.527838	0.380322	0.476787	0.454779
	82.6906	0.78734	492.989	3345.73	1060.91	20.166	0.793031	176.754	2072.81	530.365	0.199828	0.273167	0.507109	0.387817	0.502373	0.454315
test_2022_05_05_14_20	193.446	0.80506	334.819	2507.09	742.572	80.8923	0.743151	202.773	2441.89	752.575	0.305006	0.264655	0.562524	0.370891	0.445922	0.443001
test_2022_05_05_14_22	178.661	0.784974	316.267	2304.65	734.567	59.129	0.759318	152.503	2433.32	690.944	0.254418	0.285513	0.559131	0.380353	0.435738	0.450628
	168.174	0.78496	366.2	2548.13	817.947	75.3532	0.733306	223.622	2502.35	809.131	0.315312	0.296182	0.545896	0.383061	0.441923	0.443092
	194.652	0.790718	360.755	2709.12	838.732	69.4242	0.726128	164.379	2108.17	680.59	0.272244	0.289803	0.524879	0.384041	0.44787	0.449649
	180.841	0.824104	366.093	2537.98	738.243	63.3282	0.779614	156.707	2177.21	587.812	0.264791	0.226927	0.575522	0.363125	0.489774	0.434727
	213.846	0.78019	310.855	2333.6	744.76	94.0279	0.754729	167.849	2407.66	706.527	0.326259	0.293447	0.54303	0.382116	0.440565	0.446822
	224.629	0.772492	315.857	2311.29	761.081	95.0118	0.735766	185.402	2360.96	743.823	0.312449	0.312139	0.529262	0.386292	0.443539	0.448254
	177.352	0.711282	347.967	2513.93	957.756	75.5062	0.7533	168.584	2388.18	696.965	0.312664	0.38593	0.471219	0.409308	0.435958	0.44503
	208.274	0.806486	346.393	2630.77	784.683	85.5806	0.726941	178.962	2246.94	726.225	0.298067	0.267632	0.54431	0.377744	0.448939	0.446159
	184.688	0.793626	345.698	2559.51	792.716	70.9383	0.747995	201.495	2264.11	711.88	0.280619	0.277462	0.537748	0.381358	0.48109	0.440042
	139.403	0.795697	375.501	2788.82	856.029	56.4677	0.75422	186.134	2411.96	717.137	0.297516	0.273551	0.517871	0.381408	0.442074	0.443389
	159.343	0.709434	347.459	2570.94	982.162	85.7824	0.729469	164.094	2215.1	703.145	0.362338	0.402318	0.467915	0.412208	0.448805	0.45127
	171.577	0.805396	370.524	2684.95	813.411	53.6989	0.751406	198.283	2432.31	731.933	0.252918	0.261504	0.547733	0.374527	0.453768	0.441919
	207.564	0.809711	334.414	2479.42	728.927	63.2247	0.737325	195.943	2398.05	756.672	0.242653	0.260666	0.559889	0.370815	0.4447	0.446635
	166.49	0.757918	341.944	2390.09	823.697	72.4903	0.721293	170.194	2317.46	750.898	0.317308	0.338063	0.522625	0.391101	0.440507	0.453952
	213.571	0.796366	335.581	2308.43	725.945	85.9714	0.758626	153.17	2401.5	681.998	0.300295	0.268681	0.552261	0.376407	0.460668	0.448507
	215.106	0.819503	360.818	2622.3	755.547	60.6131	0.767319	157.827	2337.08	653.937	0.241154	0.237301	0.568297	0.366479	0.431989	0.446204
	208.598	0.816428	334.765	2443.78	713.701	61.3315	0.76801	184.217	2489.39	704.849	0.233952	0.240732	0.570098	0.36778	0.448298	0.440154
	196.336	0.788623	346.603	2478.39	786.216	71.4981	0.745227	188.685	2299.23	706.118	0.281431	0.286419	0.546481	0.380553	0.456746	0.441685
	177.119	0.806252	342.887	2677.08	783.78	52.79	0.76981	153.197	2425.26	663.947	0.24235	0.253145	0.544624	0.375003	0.446644	0.44643
	200.86	0.780502	338.594	2758.6	864.469	63.3983	0.75421	157.659	2173.64	639.986	0.24366	0.292777	0.505903	0.389699	0.464287	0.443931
	252.974	0.78987	330.432	2428.06	762.652	79.0294	0.738087	177.718	2359.86	735.354	0.241062	0.285491	0.547922	0.380617	0.446527	0.448225
	256.314	0.76475	346.69	2576.68	858.197	72.4914	0.759941	176.776	2432.71	712.169	0.237178	0.312107	0.509512	0.392823	0.450052	0.44376
	161.052	0.756866	384.417	2690.01	928.487	42.6152	0.771423	163.22	2313.39	631.818	0.225878	0.318528	0.512914	0.39451	0.459106	0.437639
	202.247	0.807178	335.121	2527.06	748.563	52.8788	0.751057	206.45	2446.87	751.066	0.218689	0.257632	0.557905	0.371714	0.45617	0.440252
	193.827	0.787813	367.309	2535.86	815.871	50.3165	0.765456	155.579	2265.98	635.426	0.215357	0.278159	0.548055	0.376867	0.45112	0.442024
	199.328	0.790442	333.441	2568.64	789.199	60.764	0.788527	145.988	2259.61	581.494	0.276157	0.267054	0.528466	0.384196	0.450744	0.438763
	233.955	0.815072	347.047	2275.74	695.785	54.1364	0.771613	185.473	2473.27	694.052	0.185526	0.240518	0.603458	0.361844	0.471619	0.437185
	226.944	0.799688	313.895	2300.61	703.715	46.6537	0.777176	203.467	2633.44	729.857	0.178121	0.25903	0.57837	0.372469	0.454163	0.433049
	213.133	0.795377	365.112	2629.3	815.011	64.2007	0.768053	162.46	2086.76	600.423	0.241126	0.267924	0.537229	0.380229	0.49183	0.432881
	249.91	0.789454	390.118	2668.86	863.072	56.571	0.749743	177.749	2406.33	716.261	0.192094	0.282925	0.532958	0.381057	0.466826	0.443105
	218.426	0.814061	347.065	2542.58	746.775	52.2222	0.775454	189.144	2535.03	694.775	0.199908	0.241492	0.569678	0.370223	0.471006	0.435369
	204.356	0.797935	364.592	2715.79	831.661	46.1159	0.760177	187.317	2368.78	686.068	0.193956	0.268645	0.537795	0.378975	0.460821	0.437978
	202.519	0.803129	332.487	2364.74	723.465	49.5128	0.791947	128.194	2175.89	541.38	0.219792	0.249546	0.573364	0.370332	0.465177	0.434117
	157.807	0.784574	370.001	2700.75	853.258	54	0.789302	191.418	2594.77	690.082	0.267468	0.274036	0.522471	0.381778	0.464699	0.432471
	197.23	0.791529	369.417	2582.68	817.829	43.0593	0.765645	172.223	2275.23	622.176	0.189794	0.27326	0.545234	0.379547	0.477881	0.439623
	182.389	0.816674	375.575	2692.98	790.927	46.9444	0.785548	178.267	2244.89	609.819	0.20613	0.235003	0.568346	0.370052	0.470193	0.433404
	153.435	0.752243	383.244	2879.9	991.233	48.0694	0.782362	195.192	2364.49	653.318	0.246806	0.317028	0.47817	0.399074	0.475625	0.434059
	204.143	0.806538	357.503	2516.87	765.446	47.2273	0.78217	152.64	2108.41	569.851	0.196439	0.248023	0.562482	0.372041	0.495338	0.432927
	163.952	0.813751	358.921	2784.47	799.145	37.7188	0.790574	174.239	2447.16	628.704	0.2005	0.237267	0.535658	0.372216	0.470228	0.432822
	220.534	0.799834	375.593	2681.8	832.495	50.2671	0.75762	183.156	2244.37	665.88	0.190699	0.267134	0.542158	0.38062	0.482993	0.438363
	202.582	0.822612	348.427	2676.58	753.499	41.3077	0.762156	189.761	2222.44	656.581	0.186869	0.233213	0.556041	0.367027	0.483294	0.438727
	169.616	0.793682	382.462	2756.73	860.833	43.7731	0.779975	154.348	2193.83	588.282	0.212921	0.266559	0.535436	0.38053	0.480497	0.435064
	208.693	0.818154	379.66	2687.51	783.468	42.6133	0.760276	189.612	2406.6	686.347	0.186655	0.2405	0.574079	0.366313	0.46539	0.437689
	164.713	0.831365	371.545	2504.18	727.595	34.2657	0.807679	139.013	2435.16	562.744	0.175893	0.210727	0.608806	0.359224	0.446434	0.43197
	180.154	0.814265	357.991	2596.8	762.037	46.3077	0.771757	187.09	2260.81	630.698	0.216787	0.241612	0.561289	0.369684	0.485052	0.427478
	171.744	0.809672	381.199	2677.61	802.113	38.7381	0.787144	171.399	2340.55	617.588	0.196057	0.242951	0.563333	0.373002	0.466331	0.432044
	163.892	0.815691	365.885	2729.99	787.36	41.8486	0.785178	150.218	2092.39	547.257	0.208514	0.235982	0.556655	0.36919	0.471538	0.430946
	203.66	0.820729	376.268	2703.86	785.274	43.3522	0.773949	163.467	2377.93	656.035	0.1817	0.23216	0.569824	0.368967	0.472687	0.44253
	172.112	0.797929	376.363	2581.67	804.908	37.0969	0.790934	203.971	2463.2	654.376	0.189653	0.257184	0.554581	0.376075	0.484838	0.426648
	62.8194	0.776358	371.432	2800.7	879.603	27.1852	0.847261	97.273	2616.5	463.396	0.376681	0.265144	0.513171	0.389752	0.420397	0.429661
	220.202	0.80489	329.167	2391.6	721.238	46.3951	0.78354	167.354	2209.13	596.07	0.177609	0.250783	0.577617	0.370469	0.493849	0.431209
	124.117	0.803303	356.469	2636.93	784.302	27.2207	0.806595	166.619	2421.06	576.619	0.195371	0.247208	0.557146	0.375271	0.4653	0.420084
	75.6393	0.791589	333.181	3055.99	865.994	24.2787	0.832597	95.8166	2058.37	403.16	0.267078	0.252188	0.488134	0.380191	0.440474	0.427489
	150.427	0.775356	416.717	2928.11	958.21	37.7073	0.795439	190.648	2393.63	611.27	0.208533	0.2844	0.506525	0.38908	0.506392	0.41999
	119.455	0.798204	373.03	2803.18	841.389	37.395	0.80663	191.508	2347.73	592.034	0.245593	0.249977	0.534534	0.378069	0.514092	0.422375
	142.36	0.80888	386.463	2851.08	831.186	33.3655	0.791106	174.776	2252.35	592.385	0.198413	0.243797	0.551463	0.371638	0.494118	0.426844
	129.793	0.794727	399.871	2957.34	909.208	24.2162	0.807313	167.37	2464.45	575.818	0.169975	0.256342	0.520505	0.380807	0.467258	0.42813
	112.822	0.767759	440.3	2978.34	1004.31	23.6776	0.821784	158.182	2473.46	543.663	0.19034	0.284317	0.500483	0.3921	0.470383	0.428561
	116.938	0.813524	416.191	2973.42	867.929	27.5137	0.815591	155.961	2097.88	500.592	0.191533	0.229629	0.545744	0.370531	0.52885	0.417204
	100.106	0.801238	428.078	2942.98	897.642	26.9242	0.807144	172.111	2311.43	552.175	0.213244	0.247864	0.551372	0.37258	0.508474	0.411848
	124.245	0.7534	418.097	2877.32	996.588	29.3367	0.777177	195.033	2291.96	640.556	0.197294	0.31847	0.515375	0.394687	0.506332	0.429381
	90.1879	0.788815	429.573	2671.7	886.89	22.5636	0.812545	178.412	2395.08	556.349	0.204627	0.264135	0.56914	0.381098	0.522348	0.41585
	112.386	0.784675	425.276	2976.82	942.96	28.1957	0.814084	204.384	2461.59	591.146	0.200445	0.266015	0.524312	0.385067	0.513847	0.415663
	67.0469	0.786198	403.187	2777.34	879.08	21.9648	0.799058	209.77	2362	600.678	0.252128	0.27133	0.546613	0.380788	0.531815	0.414076
	123.583	0.798597	372.884	2472.26	769.908	40.5669	0.804387	201.989	2162.58	558.56	0.231999	0.250661	0.589809	0.36793	0.56573	0.408165
	104.503	0.788786	449.813	3019.6	965.521	24.8736	0.799672	186.635	2180.97	542.85	0.200141	0.267556	0.534116	0.381537	0.528803	0.409054
	82.8023	0.82545	449.89	3192.25	882.713	20.3256	0.826697	211.8	2637.35	589.255	0.204349	0.21332	0.557424	0.367552	0.513792	0.407147
	94.5921	0.821132	393.406	2799.72	806.184	36.8158	0.80669	172.27	2060.41	520.935	0.264306	0.223092	0.573097	0.36795	0.577456	0.410209
	90.437	0.808918	430.434	2924.64	884.26	18.9328	0.795788	183.963	2186.75	532.969	0.176307	0.243031	0.557917	0.374355	0.557678	0.409345
	102.935	0.808475	399.854	2773.29	832.252	30.1299	0.783258	165.253	1829.04	502.069	0.214237	0.244585	0.564215	0.372405	0.581467	0.414599
	65.1009	0.801652	459.382	3173.03	953.241	18.2661	0.775488	236.319	2205.86	645.829	0.217194	0.257538	0.532926	0.375871	0.538139	0.4171
test_2022_05_05_14_24	207.116	0.761076	353.062	2830.68	939.738	106.474	0.747481	198.742	2364.45	733.272	0.35351	0.320596	0.517181	0.40171	0.4699	0.416856
test_2022_05_05_14_25	203.32	0.797394	374.718	2810.18	864.093	83.3402	0.734711	222.064	2348.66	779.486	0.299082	0.277091	0.561043	0.38282	0.468426	0.417627
	243.019	0.820077	358.5	2761.96	789.53	96.046	0.73019	211.224	2411.71	790.981	0.28579	0.248165	0.588742	0.372104	0.461532	0.421598
	259.121	0.809274	351.598	2843.92	824.531	95.8897	0.729097	191.219	2290.86	745.809	0.283328	0.263033	0.562154	0.379252	0.475151	0.422243
	242.518	0.799388	363.366	2778.9	849.159	90.5294	0.714872	190.484	2347.26	794.559	0.274685	0.281974	0.57081	0.385099	0.445362	0.431414
	197.536	0.787818	360.324	2761.29	862.102	90.1216	0.738185	187.096	2387.14	762.374	0.338042	0.287866	0.556437	0.387711	0.453666	0.423849
	172.659	0.814665	359.705	2822.72	811.556	76.0732	0.749414	179.453	2269.32	695.396	0.31216	0.248655	0.581517	0.377665	0.470632	0.421565
	242.231	0.822571	351.753	2654.8	759.298	74.7225	0.748898	194.775	2273.8	703.737	0.244924	0.238486	0.59626	0.368457	0.48258	0.417178
	257.65	0.801296	365.273	2835.43	854.871	88.2566	0.752764	186.074	2391.84	722.551	0.262088	0.264637	0.556126	0.383009	0.469603	0.419706
	219.323	0.800718	368.791	2953.38	881.071	75.3363	0.768593	168.025	2293.59	647.476	0.261739	0.261069	0.541761	0.383345	0.479774	0.413562
	226.956	0.806751	352.756	2792.88	822.977	69.255	0.785421	153.002	2380.89	621.402	0.244953	0.24668	0.567913	0.380232	0.475661	0.415895
	239.322	0.80116	350.638	2877.62	848.609	76.2769	0.760126	205.801	2276.13	687.752	0.249576	0.26308	0.550764	0.382396	0.490956	0.411291
	194.084	0.823706	368.306	2785.06	791.898	61.3158	0.755586	186.675	2408.55	723.853	0.246458	0.233416	0.592799	0.370012	0.439257	0.419697
	237.63	0.832831	302.805	2546.09	676.715	59.2269	0.796102	154.343	2560.85	632.18	0.21099	0.211039	0.608252	0.360573	0.454357	0.417815
	193.757	0.815909	351.859	2635.07	772.384	62.7826	0.742033	211.476	2479.92	776.608	0.270063	0.25321	0.601186	0.371731	0.452419	0.428388
	254.387	0.820579	326.151	2636	740.915	80.1957	0.770439	182.101	2361.68	673.365	0.250316	0.23365	0.591008	0.369642	0.486296	0.413991
	236.806	0.804823	340.742	2722.51	803.946	68.4652	0.757681	153.396	2257.83	653.395	0.231538	0.258821	0.573531	0.381245	0.471346	0.420384
	184.877	0.79526	349.035	2861.9	862.62	64.3518	0.784749	156.928	2303.53	607.575	0.270807	0.262336	0.548219	0.386946	0.489709	0.41039
	255.95	0.817631	356.923	2756.37	794.363	63.3911	0.751043	182.199	2361	710.593	0.203599	0.243328	0.590017	0.373978	0.47953	0.421345
	206.875	0.809962	362.986	2953.12	851.453	60.5855	0.773128	163.12	2358.82	644.242	0.228279	0.247577	0.56159	0.380951	0.479322	0.412802
	263.313	0.803913	347.277	2834.41	833.398	67.3694	0.759171	169.521	2291.73	671.881	0.211318	0.259501	0.5575	0.38157	0.477061	0.421674
	237.422	0.829582	378.178	3028.57	831.625	70.2752	0.717267	177.114	2144.6	721.499	0.234224	0.238556	0.571161	0.369793	0.487688	0.428375
	273.222	0.827423	337.564	2639.83	735.978	61.1709	0.784551	171.993	2364.51	627.478	0.187638	0.220384	0.600099	0.366339	0.488953	0.406352
	211.877	0.804131	358.761	2915.45	857.236	62.0387	0.785713	184.891	2323.38	628.553	0.233479	0.250392	0.542413	0.382619	0.499421	0.405288
	188.474	0.810052	350.557	2874.25	824.871	54.1353	0.79178	175.338	2265.79	600.81	0.230269	0.240585	0.560989	0.379463	0.503744	0.400909
	192.994	0.814874	371.388	2932.94	844.855	43.8605	0.804373	125.246	2483.21	570.982	0.196348	0.231062	0.566424	0.378443	0.460492	0.413478
	283.703	0.839275	355.433	2779.73	746.496	57.8784	0.757861	164.577	1973.27	589.324	0.166541	0.213444	0.609191	0.362927	0.513812	0.409699
	165.168	0.810379	373.55	2796.5	830.484	39.1176	0.802393	153.324	2434.16	576.247	0.201146	0.237902	0.587065	0.379553	0.468155	0.40827
	185.846	0.809741	358.335	3009.96	861.63	73.3231	0.806485	183.544	2386.74	595.161	0.268575	0.236845	0.544299	0.381287	0.50881	0.398082
	223.679	0.821263	370.986	2819.22	809.29	61.8397	0.765308	152.917	1983.16	579.733	0.217901	0.235852	0.585576	0.371373	0.526569	0.406615
	211.794	0.793499	376.269	2910.26	900.147	57.125	0.769323	180.778	2317.16	648.359	0.216155	0.268544	0.548886	0.388912	0.480978	0.408502
	220.911	0.805465	360.494	2833.74	842.436	58.8515	0.774747	216.749	2375.28	695.642	0.214233	0.251342	0.558276	0.3819	0.497331	0.408243
	199.193	0.82716	367.864	2871.33	800.847	47.3147	0.786653	193.933	2478.86	666.65	0.197881	0.220903	0.586912	0.371289	0.477823	0.401977
	244.194	0.803586	376.019	2868.51	867.615	72.1771	0.771202	169.597	2110.95	602.79	0.232033	0.25546	0.564928	0.381727	0.521545	0.407314
	255.548	0.817665	340.065	2774.23	782.348	49.3508	0.775912	197.403	2415.87	676.806	0.169532	0.236013	0.58323	0.374632	0.497992	0.407825
	260.833	0.784651	342.916	2837.88	877.17	144.921	0.786659	204.523	2089.59	597.588	0.335812	0.274614	0.532427	0.392136	0.550577	0.389309
	219.188	0.779179	381.973	2932.68	944.324	58.6147	0.782291	142.891	2318.26	607.258	0.220348	0.283211	0.533148	0.393407	0.487518	0.419855
	168.345	0.810447	359.246	2863.23	829.819	44.9424	0.792324	165.892	2434.11	617.803	0.221779	0.239574	0.565829	0.380069	0.475817	0.407921
	186.1	0.78198	381.309	2857.35	918.342	52.5467	0.781669	176.812	2329.29	634.082	0.227151	0.2794	0.545844	0.392196	0.479997	0.408814
	187.251	0.7822	403.388	2975.57	959.142	46.2046	0.796152	174.192	2460.27	622.671	0.208355	0.274911	0.535498	0.393812	0.47685	0.403359
	245.268	0.80199	402.441	2884.71	890.303	57.5839	0.772733	188.97	2538.2	705.869	0.201224	0.256763	0.564441	0.384956	0.479549	0.410157
	192.27	0.758457	383.903	2948.2	1001.44	56.3161	0.757101	199.341	2291.16	692.728	0.232647	0.320518	0.509131	0.404947	0.502451	0.411722
	200.824	0.817756	336.511	2658.31	757.754	43.4155	0.806174	193.762	2290.81	583.903	0.179969	0.227339	0.59433	0.373169	0.533189	0.387264
	146.836	0.805504	415.142	3166.04	940.671	50.1379	0.774571	171.663	2198.13	616.986	0.245293	0.252651	0.542567	0.385201	0.520451	0.408791
	143.216	0.788525	391.466	2997.47	934.678	43.4845	0.780643	189.297	2048.05	575.829	0.251861	0.272417	0.530367	0.391116	0.539652	0.392572
	206.155	0.791034	400.118	2940.73	926.707	49.8122	0.789446	180.327	2369.29	632.717	0.197371	0.266215	0.548394	0.390106	0.50121	0.404973
	147.619	0.778654	380.317	2907.81	939.986	39.3915	0.77321	165.708	2212.36	617.774	0.211136	0.287149	0.536421	0.392833	0.506949	0.409115
	204.743	0.804909	406.013	2894.75	887.688	47.9071	0.786034	183.891	2194.28	602.22	0.19551	0.249174	0.573973	0.381598	0.52951	0.397803
	163.647	0.782952	389.911	2979.43	950.069	44.8125	0.794699	193.714	2350.13	614.688	0.230125	0.275307	0.528278	0.391015	0.521508	0.400446
	262.419	0.759481	373.191	2960.34	994.926	46.4946	0.789328	181.223	2221.03	592.327	0.15478	0.307882	0.494984	0.402244	0.518533	0.398121
	219.794	0.795094	397.248	2920.03	912.278	44.9273	0.794878	160.982	2145.91	553.57	0.173626	0.258244	0.554057	0.386988	0.522404	0.398685
	146.767	0.82096	396.421	2919.26	846.332	39.8271	0.811174	199.692	2382.23	594.364	0.215727	0.221501	0.585803	0.374669	0.534787	0.390605
	150.411	0.762321	368.206	2892.9	968.995	40.0444	0.780807	228.787	2401.16	688.216	0.213562	0.305868	0.519029	0.39964	0.531278	0.394068
	208.09	0.785781	391.153	2923.03	930.046	42.8029	0.76271	183.296	2223.24	634.625	0.174884	0.284228	0.542947	0.390195	0.502891	0.407094
	156.605	0.795449	381.755	2936.91	899.284	39.5966	0.790171	219.718	2326.42	634.693	0.202558	0.260874	0.548584	0.388235	0.539376	0.392255
	146.019	0.751617	393.71	2952.86	1023.71	39.3981	0.805566	167.829	2260.11	556.84	0.252344	0.310077	0.506765	0.407385	0.525786	0.393639
	184.621	0.798308	393.939	2920.61	901.38	33.7328	0.760817	207.754	2082.15	628.286	0.15901	0.270951	0.547773	0.383989	0.531701	0.40201
	170.443	0.789414	415.053	2928.83	940.827	31.2989	0.799646	216.765	2581.44	674.083	0.16407	0.263987	0.555948	0.388127	0.49739	0.402596
	174.4	0.78134	403.775	2999.52	964.885	38.9742	0.77163	160.757	1973.32	553.423	0.192567	0.285668	0.537809	0.395286	0.547146	0.397332
	248.514	0.761489	433.057	3059.3	1055.42	86.5571	0.80111	204.644	2107.86	575.489	0.269289	0.299373	0.511575	0.400435	0.581963	0.384079
	158.774	0.785299	404.175	2885.83	932.273	41.7935	0.799596	166.659	2172.53	558.748	0.202784	0.270074	0.551883	0.39255	0.524609	0.395831
	163.333	0.818228	398.225	2849.7	841.578	71.0071	0.807238	200.64	2021.55	536.06	0.299572	0.226909	0.59069	0.374125	0.59231	0.373748
	175.727	0.789181	425.331	3051.84	976.818	33.6919	0.804204	177.349	2504.3	584.463	0.169209	0.262938	0.539238	0.389667	0.532058	0.397464
	162.98	0.825391	397.075	2938.34	840.477	29.695	0.791505	145.717	2136.61	525.546	0.157052	0.222931	0.590463	0.372957	0.536477	0.398615
	177.166	0.808653	417.931	2993.88	909.205	31.0897	0.80754	182.384	2439.65	601.019	0.153071	0.237647	0.567526	0.382338	0.51802	0.393265
	137.699	0.799766	413.075	3055.01	938.116	30.8789	0.811656	165.43	2235.8	531.005	0.189248	0.248693	0.548218	0.386127	0.525661	0.391673
	208.39	0.76863	427.224	3065.2	1032.02	42.5	0.78896	198.249	2186.53	598.228	0.170814	0.29511	0.516359	0.398844	0.537051	0.393525
	192.83	0.743211	408.451	3063.46	1087.26	33.2925	0.786592	192.086	2157.08	586.288	0.157004	0.329429	0.48253	0.410191	0.538633	0.395303
	141.075	0.796721	418.501	2965.58	931.179	43.9342	0.813333	172.159	2022.66	498.551	0.230834	0.251247	0.555719	0.388525	0.563061	0.37829
	168.151	0.80114	386.611	2994.68	905.306	28.9771	0.811993	200.953	2480.14	566.543	0.152019	0.249272	0.548185	0.384268	0.522506	0.381429
	160.9	0.787667	417.512	3012.34	963.646	40.9875	0.813348	176.949	2212.84	532.295	0.206126	0.261176	0.542056	0.39036	0.535089	0.383569
	116.825	0.817887	414.984	2970.77	873.486	24.4575	0.790494	199.235	2418.41	613.351	0.178101	0.235112	0.581345	0.375616	0.518494	0.390506
	137.902	0.763607	430.064	3024.92	1041.42	26.8851	0.801279	153.776	1995.16	495.776	0.167665	0.296824	0.52105	0.399562	0.547214	0.386601
	134.402	0.795847	413.925	3024.86	936.57	34.8033	0.793729	163.79	2104.55	546.011	0.201297	0.262162	0.54701	0.386765	0.564511	0.393544
	96.1139	0.800974	440.291	3178.69	974.81	34.0506	0.788362	193.901	1776.27	522.629	0.264013	0.252967	0.543386	0.387088	0.594272	0.38072
	96.2476	0.815222	426.169	3150.19	919.799	21.2762	0.821278	117.91	2280.21	460.73	0.184988	0.228574	0.557159	0.382032	0.546448	0.390359
	72.8193	0.763729	449.123	3092.98	1060.24	24.5723	0.811298	204.973	2442.8	589.427	0.250667	0.295107	0.517485	0.401752	0.550396	0.384917
test_2022_05_05_14_27	187.53	0.78964	373.726	2602.38	822.315	95.1421	0.702518	208.214	2548.54	894.119	0.343864	0.302237	0.540999	0.380119	0.407618	0.466419
test_2022_05_05_14_29	180.951	0.822002	361.458	2674.89	757.224	86.4933	0.703473	240.256	2469.13	884.522	0.330218	0.255192	0.560053	0.365231	0.409691	0.460828
	170.468	0.781484	345.085	2512.65	805.92	88.9914	0.710609	240.86	2538.48	881.181	0.346451	0.310545	0.524239	0.385064	0.417296	0.459065
	176.602	0.794165	346.089	2563.99	795.632	67.5918	0.721059	210.964	2402.62	812.213	0.280148	0.285664	0.539159	0.377685	0.431681	0.463979
	184.549	0.796291	361.882	2501.07	781.097	92.381	0.699193	218.076	2553.02	900.496	0.338897	0.293302	0.561479	0.374757	0.404405	0.465631
	203.037	0.770736	345.614	2238.25	771.616	89.4889	0.706437	213.64	2416.84	849.166	0.307306	0.3265	0.55015	0.3845	0.424002	0.465471
	232.505	0.778801	400.592	2832.8	929.232	93.6413	0.722524	219.172	2467.85	830.2	0.294906	0.308841	0.503391	0.388909	0.435853	0.458956
	184.876	0.785503	348.153	2584.48	815.713	92.5155	0.747578	195.923	2319.65	721.009	0.344996	0.289218	0.512258	0.384508	0.45432	0.453395
	198.251	0.804251	374.547	2782.21	835.045	78.3697	0.702582	223.243	2461.2	866.531	0.290433	0.282115	0.539906	0.377298	0.42192	0.463134
	147.279	0.769293	359.811	2684.81	868.224	76.5966	0.744793	189.215	2602.14	781.522	0.373548	0.314088	0.497028	0.388525	0.411363	0.457212
	180.289	0.763284	333.281	2562.03	846.078	75.5556	0.720245	212.145	2415.85	807.224	0.320233	0.330425	0.507039	0.392242	0.432414	0.458541
	132.118	0.813343	406.56	2942.05	869.845	70.4342	0.735879	203.661	2802.7	882.319	0.356293	0.253292	0.532563	0.374628	0.379975	0.458743
	168.538	0.770984	342.21	2570.58	838.469	85.5577	0.730082	232.78	2636.2	868.127	0.347836	0.316596	0.504817	0.392153	0.418147	0.455161
	191.709	0.777758	358.791	2703.9	865.037	97.2522	0.736135	242.793	2390.01	796.448	0.346605	0.302738	0.491294	0.387889	0.464161	0.451213
	195.384	0.77505	357.001	2611.7	848.793	85.156	0.744712	178.806	2335.14	720.262	0.319206	0.30272	0.521164	0.386549	0.452621	0.457662
	214.663	0.809134	376.44	2521.84	775.338	77.7766	0.727011	195.319	2438.23	793.9	0.27012	0.264318	0.567446	0.371869	0.414957	0.460619
	193.85	0.760393	380.768	2837.38	952.921	79.97	0.750479	242.421	2572.69	806.984	0.301457	0.321581	0.481699	0.395504	0.4422	0.448357
	232.859	0.813053	330.537	2299.07	690.195	65.875	0.740097	207.237	2338.92	750.678	0.228145	0.254659	0.585352	0.36671	0.454847	0.457026
	157.343	0.794001	339.583	2587.18	780.292	70.4394	0.75075	200.964	2323.26	713.451	0.322824	0.275648	0.535207	0.378712	0.467961	0.45048
	254.873	0.807529	379.204	2613.94	796.813	79.9317	0.721855	221.786	2422.86	816.556	0.247777	0.268523	0.555634	0.372995	0.446793	0.459525
	208.19	0.781927	351.582	2532.94	818.665	72.5948	0.729533	243.511	2631.22	869.307	0.263496	0.300942	0.535435	0.385205	0.425464	0.4547
	221.158	0.776995	391.82	2668.61	885.112	74.9352	0.726976	199.704	2502.4	814.715	0.258216	0.308481	0.518369	0.387511	0.430928	0.459791
	204.797	0.806309	327.101	2564.19	748.773	71.0135	0.740849	189.092	2301.05	717.266	0.26045	0.264645	0.545751	0.376507	0.457718	0.453996
	154.667	0.77413	367.775	2485.53	825.224	252.222	0.737849	177.884	1924.01	632.105	0.611442	0.307468	0.525622	0.388386	0.51508	0.451564
	203.985	0.798561	370.508	2641	812.009	71.9632	0.754541	190.719	2234.68	680.899	0.266764	0.269286	0.543935	0.375268	0.467025	0.449927
	280.707	0.800129	345.147	2494.7	766.34	80.44	0.745066	232.712	2457.49	778.461	0.220222	0.269332	0.556335	0.375189	0.458482	0.446823
	196.13	0.799788	361.788	2529.35	785.546	62.2373	0.75133	187.721	2543	765.659	0.25451	0.267424	0.553186	0.37614	0.416707	0.456917
	202.474	0.777073	401.75	2656.3	886.908	70.3362	0.731805	198.573	2456.59	787.776	0.267895	0.306761	0.52456	0.386194	0.418806	0.456447
	255.874	0.786904	355.932	2569.91	814.729	78.3473	0.743116	210.215	2449.2	766.912	0.242065	0.28833	0.540735	0.382746	0.435544	0.453678
	152.69	0.817437	341.145	2731.4	763.472	53.1337	0.776765	159.966	2278.09	613.349	0.272919	0.237065	0.540894	0.372968	0.437758	0.443659
	222.507	0.81272	359.805	2527.32	757.232	62.1111	0.758422	189.214	2305.16	684.306	0.224121	0.248545	0.576869	0.370608	0.466228	0.451415
	274.562	0.828006	362.367	2696.22	756.741	63.2159	0.74795	231.86	2539.77	804.3	0.190631	0.230202	0.575873	0.364547	0.449011	0.451744
	224.714	0.818423	357.344	2495.9	735.037	58.0324	0.743638	200.596	2601.43	808.144	0.211279	0.246142	0.574458	0.365568	0.410076	0.455749
	185.286	0.785859	324.539	2310.46	738.791	69.5397	0.749274	211.107	2409.75	741.246	0.265986	0.286971	0.549629	0.380872	0.45369	0.446973
	203.514	0.814501	378.107	2738.55	801.447	66.018	0.741336	205.233	2447.56	769.113	0.248031	0.251865	0.552888	0.371241	0.437962	0.454808
	241.333	0.782463	366.94	2652.44	850.937	58.2469	0.76973	182.612	2455.99	691.098	0.197543	0.283312	0.526281	0.385823	0.433569	0.449591
	283.248	0.823459	396.964	2727.43	802.657	62.7129	0.728029	260.019	2420.02	816.203	0.182379	0.244942	0.572095	0.367765	0.450927	0.452966
	167.748	0.822002	373.969	2593.59	757.385	42.0631	0.77256	171.304	2456.8	671.308	0.205344	0.232041	0.571662	0.365223	0.430661	0.451473
	246.676	0.839098	379.36	2560.96	726.392	53.8235	0.752211	231.764	2384.75	746.119	0.186431	0.216299	0.607782	0.357068	0.47969	0.448159
	205.809	0.785174	409.493	2952.07	939.374	62.9574	0.733963	182.007	2168.73	694.888	0.240893	0.293112	0.510033	0.386211	0.464466	0.457733
	193.043	0.801807	405.353	2806.2	869.689	51.7957	0.747826	163.61	2379.61	707.471	0.212439	0.267216	0.536705	0.378949	0.436351	0.459495
	261.264	0.782079	392.791	2707.37	886.532	72.1435	0.743568	210.512	2459.1	771.152	0.233853	0.294209	0.520604	0.386699	0.444151	0.45386
	211.531	0.810232	369.279	2451.91	755.694	67.6345	0.763347	215.032	2512.66	742.686	0.235665	0.249049	0.572015	0.368471	0.45595	0.446996
	209.677	0.774286	360.144	2346.57	801.183	76.2097	0.728253	199.229	2121.26	704.954	0.26453	0.311579	0.551299	0.385165	0.466143	0.45289
	190.486	0.795746	387.552	2495.17	805.535	56.028	0.754001	185.774	2388.53	704.51	0.233856	0.271899	0.559592	0.375675	0.452629	0.449553
	337.051	0.78651	369.497	2676.09	851.755	71	0.749222	218.525	2512.94	783.145	0.180463	0.286357	0.522743	0.385132	0.449461	0.449519
	211.017	0.815453	333.614	2352.94	687.468	52.8843	0.763991	197.846	2475.26	720.089	0.204921	0.244258	0.581627	0.362047	0.449911	0.447866
	149.687	0.742925	388.465	2741.37	972.158	40.8341	0.778651	205.451	2528.86	689.764	0.224054	0.331791	0.49946	0.398114	0.463164	0.441433
	186.192	0.802082	387.349	2956.44	883.255	49.972	0.765186	201.87	2522.25	724.787	0.217212	0.260357	0.5025	0.379704	0.46071	0.446771
	204.527	0.807732	368.343	2627.09	792.559	54.491	0.760524	221.055	2441.08	730.872	0.218234	0.255735	0.552621	0.37181	0.452622	0.44324
	282.038	0.81656	368.296	2605.39	764.53	63.2075	0.736419	210.61	2335.6	750.705	0.199061	0.251061	0.568459	0.368482	0.464825	0.454012
	186.42	0.820734	391.359	2601.54	777.873	41.775	0.780291	187.245	2429.93	665.428	0.190554	0.230604	0.582238	0.366204	0.437326	0.446059
	207.779	0.777928	386.748	2706	893.271	50.8571	0.732668	265.863	2420.12	800.303	0.205194	0.307676	0.510119	0.388575	0.456192	0.448759
	181.385	0.818602	376.513	2845.27	815.429	45.6703	0.71388	253.825	2294.4	807.868	0.204295	0.257965	0.542163	0.369992	0.455371	0.456711
	218.016	0.812668	357.598	2406.16	728.463	42.0039	0.766134	202.685	2421.69	703.128	0.165201	0.246964	0.587329	0.364547	0.463144	0.445989
	243.896	0.78081	402.725	2755.79	906.628	62.8806	0.758852	223.668	2168.13	675.161	0.213564	0.291041	0.51796	0.388475	0.48689	0.441099
	192.966	0.814902	412.295	2906.67	867.51	55.3475	0.757673	225.921	2267.04	708.988	0.228431	0.24523	0.541982	0.374925	0.479014	0.443508
	199.517	0.829711	419.073	3201.83	882.942	50.023	0.79548	214.694	2578.2	675.15	0.19951	0.215288	0.533972	0.367512	0.450156	0.431148
	165.858	0.790508	391.159	2708.3	860.222	47.8248	0.766004	192.087	2220.8	634.09	0.226511	0.276497	0.53618	0.378609	0.471818	0.440853
	170.495	0.809955	386.716	2898.85	852.807	39.476	0.754536	198.159	2349.58	701.537	0.193159	0.256296	0.536458	0.37509	0.463478	0.45066
	223.679	0.797096	404.583	2537.46	821.207	53.2571	0.782835	215.257	2501.43	697.895	0.188215	0.26178	0.570824	0.375262	0.483021	0.438844
	212.829	0.823804	414.281	2822.85	829.938	41.6709	0.759253	231.226	2579.06	771.276	0.165624	0.23385	0.566683	0.367744	0.452676	0.449133
	217.709	0.822609	410.014	2782.75	818.677	47.8851	0.774701	207.97	2563.24	722.488	0.182834	0.229451	0.569754	0.367872	0.456831	0.443744
	198.913	0.796755	424.08	2784.92	892.416	43.1627	0.760724	207.649	2401.68	705.785	0.18361	0.27158	0.531923	0.382119	0.475633	0.446125
	164.424	0.705046	380.332	2653.32	1019.38	41.0424	0.788211	199.558	2532.08	671.008	0.215669	0.376127	0.47938	0.408259	0.449012	0.436731
	191.278	0.809071	414.201	2830.79	859.982	38.0667	0.771919	174.599	2378	652.061	0.17612	0.24895	0.558934	0.373385	0.456841	0.448913
	218.28	0.7927	414.341	2865.15	895.48	39.035	0.792554	238.107	2651.19	720.518	0.154584	0.263	0.53346	0.381121	0.46889	0.436126
	223.137	0.823921	411.236	2915.61	845.719	42.4619	0.769406	211.776	2340.3	673.991	0.162084	0.231724	0.560783	0.370514	0.479683	0.443029
	188.569	0.801113	435.561	3023.26	929.594	42.5743	0.770236	193.598	2151.71	621.468	0.194916	0.261118	0.525382	0.381051	0.502544	0.442568
	165.777	0.812352	422.913	2871.67	858.904	38.7895	0.770379	187.628	2209.7	625.609	0.191445	0.246217	0.559682	0.371276	0.496652	0.442692
	138.893	0.823599	416.157	2774.57	817.429	38.1674	0.744934	236.131	2343.11	702.543	0.215461	0.240537	0.573867	0.368131	0.493649	0.441109
	129.976	0.784745	444.492	2985.81	957.937	34.8512	0.776103	197.581	2478.18	676.626	0.216333	0.283983	0.516925	0.385131	0.472296	0.444397
	172.697	0.798086	335.289	2409.44	744.94	35.0796	0.776557	178.281	2210.05	609.574	0.169513	0.263745	0.563698	0.373023	0.491117	0.443896
	179.15	0.75043	336.815	2455.77	853.924	70.2786	0.774192	204.642	2149.1	620.067	0.290295	0.325575	0.51407	0.396421	0.499483	0.437396
	139.292	0.788283	428.488	2977.16	941.519	32.4964	0.801808	195.373	2378.4	603.495	0.198299	0.26569	0.528675	0.383093	0.499028	0.426738
	121.154	0.793068	413.752	2905.15	910.781	37.6417	0.758947	264.669	2631.33	773.256	0.23432	0.277475	0.533014	0.38158	0.481409	0.439861
	183.754	0.814714	407.534	2912.22	860.179	33.1937	0.790285	188.032	2277.33	614.495	0.154633	0.236849	0.551115	0.371148	0.500428	0.440269
	150.667	0.808548	449.776	3052.99	931.164	31.75	0.792901	193.181	2330.71	599.234	0.181534	0.244234	0.534825	0.376756	0.511044	0.43234
	144.286	0.810851	480.053	3218.04	979.019	34.6286	0.772319	207.309	2150.15	627.216	0.198965	0.249292	0.525135	0.378613	0.503249	0.437415
	132.17	0.825871	458.345	3191.81	921.354	27.4043	0.763985	216.701	2261.52	650.128	0.172637	0.234478	0.547028	0.370623	0.497636	0.435068
	127.375	0.791437	439.738	2972.08	932.828	29.275	0.810443	215.945	2329.59	588.013	0.186402	0.258385	0.540179	0.380788	0.512388	0.422489
	98.2157	0.805006	442.36	3088.73	923.393	31.5784	0.781759	252.794	2228.31	659.127	0.219835	0.249962	0.548206	0.375191	0.528765	0.433165
	90.3643	0.789868	461.524	3096.87	973.434	29.4429	0.796422	221.804	2343.34	631.194	0.227822	0.264798	0.530461	0.383371	0.523139	0.427818
	96.1279	0.81262	427.596	3243.3	938.293	21.907	0.789463	210.544	2464	650.555	0.178755	0.239478	0.52451	0.371773	0.499698	0.430651
	103.221	0.791357	442.162	3307.64	1019.27	21.9286	0.805371	228.165	2535.24	617.456	0.174726	0.264465	0.497777	0.383602	0.513541	0.423006
	78.527	0.788367	508.406	3534.98	1126.69	31.0541	0.78878	260.79	2440.11	688.214	0.276504	0.272059	0.482572	0.385919	0.530997	0.428285
test_2022_05_05_14_31	178.537	0.768069	324.384	2446.62	796.896	97.7239	0.719214	233.261	2533.87	866.121	0.358175	0.324148	0.514205	0.387339	0.452771	0.435583
test_2022_05_05_14_32	191.709	0.793056	309.21	2445.86	743.419	94.8478	0.713713	274.863	2719.5	955.863	0.337924	0.291955	0.538714	0.378554	0.444101	0.432753
	167.984	0.782626	373.8	2553.61	828.368	86.8653	0.71709	266.642	2585.86	905.8	0.342096	0.304807	0.53268	0.381404	0.462726	0.434773
	195.578	0.79048	395.023	2638.44	855.814	78.7812	0.716876	246.335	2640.85	890.914	0.296346	0.29473	0.539424	0.378188	0.458515	0.430781
	156.169	0.791289	387.461	2708.92	848.257	78.9157	0.735739	223.608	2672.53	849.106	0.339645	0.283243	0.533821	0.376393	0.445306	0.434435
	226.969	0.775291	353.457	2368.19	797.97	105.574	0.699637	254.288	2705.58	979.41	0.324627	0.321726	0.533284	0.387257	0.431022	0.44046
	174.368	0.753153	364.054	2580.02	902.046	83.6053	0.709093	252.083	2402.69	852.881	0.327252	0.349909	0.509763	0.395293	0.46024	0.43283
	190.36	0.829622	368.188	2602.48	737.589	90.9907	0.695427	227.745	2370.01	859.696	0.328339	0.24668	0.586069	0.361434	0.458335	0.439564
	211.021	0.8085	328.743	2104.24	663.665	91.3857	0.700886	241.522	2562.23	909.43	0.307496	0.276062	0.599824	0.362352	0.44046	0.437632
	202.34	0.800477	349.139	2548.46	782.47	99.139	0.683387	288.931	2673.41	1024.66	0.330081	0.294875	0.549182	0.37534	0.43794	0.440087
	194.786	0.78735	295.914	1991.68	648.881	82.1282	0.74397	201.044	2459.04	766.885	0.302266	0.287396	0.567991	0.37088	0.45809	0.430813
	196.863	0.814471	355.58	2460.08	739.099	89.6875	0.727386	242.493	2605.34	877.712	0.319713	0.25579	0.582639	0.369759	0.457626	0.433082
	198.532	0.802753	311.622	2277.73	691.955	86.3205	0.749948	213.674	2571.23	788.221	0.305186	0.263831	0.56667	0.372207	0.464302	0.427759
	204.424	0.793156	351.853	2331.08	754.403	93.2606	0.718262	238.075	2530.33	864.813	0.323252	0.290568	0.566023	0.377908	0.451452	0.434352
	167.649	0.790818	309.331	2228.98	693.888	75.6623	0.748836	209.594	2505.29	769.734	0.321082	0.280565	0.553609	0.375105	0.4687	0.427442
	187.816	0.828743	368.842	2495.19	723.832	77.0398	0.712543	255.059	2730.86	948.998	0.295102	0.24194	0.592238	0.361266	0.435542	0.436739
	187.196	0.798484	355.262	2503.59	777.278	84.7391	0.690606	279.421	2765.54	1022.01	0.316377	0.293814	0.551856	0.378185	0.430589	0.439389
	250.155	0.813166	372.136	2511.88	764.323	94.6316	0.700135	259.126	2529.45	927.95	0.277076	0.268975	0.56741	0.369952	0.449451	0.439379
	216.461	0.815213	344.969	2484.57	729.053	88.6467	0.735292	262.961	2568.6	854.538	0.301164	0.253452	0.564085	0.367842	0.478645	0.426506
	212.879	0.801178	355.757	2611.36	797.206	82.8947	0.727927	251.728	2718.33	907.789	0.280381	0.2749	0.542153	0.376422	0.446069	0.432478
	195.561	0.803717	359.222	2499.45	770.286	84.2405	0.703977	237.966	2426.93	866.14	0.305633	0.279623	0.556484	0.374635	0.451893	0.439256
	202.091	0.812357	358.633	2362.63	724.209	85.7359	0.731033	246.673	2490.57	838.484	0.296902	0.258263	0.594382	0.365831	0.475837	0.431237
	193.706	0.810004	336.655	2446.99	730.617	96.7206	0.736705	257.237	2574.52	849.396	0.335264	0.259482	0.562176	0.370682	0.481236	0.425998
	179.544	0.802573	358.069	2469.55	762.021	71.0088	0.689405	269.573	2806.51	1017.97	0.287188	0.289374	0.566953	0.372096	0.426896	0.441681
	183.904	0.827766	345.851	2612.43	728.644	74.137	0.740784	229.131	2434.93	797.173	0.289152	0.234035	0.554524	0.367568	0.477638	0.433999
	184.736	0.811713	330.29	2249.35	675.79	79.5632	0.758437	258.579	2781.44	830.824	0.304019	0.249926	0.586303	0.363693	0.463335	0.421067
	214.416	0.811264	375.656	2450.25	758.688	84.0137	0.719899	253.415	2591.22	885.166	0.284486	0.263602	0.572141	0.369661	0.459001	0.431782
	189.556	0.795739	337.634	2283.16	715.195	75.7531	0.733357	251.476	2599.03	856.644	0.282776	0.280194	0.5749	0.370333	0.469366	0.429694
	205.469	0.795446	389.128	2615.12	830.689	69.5213	0.728135	166.746	2246.34	721.553	0.27281	0.282447	0.548027	0.379306	0.449764	0.437623
	189.239	0.798808	349.088	2516.05	774.251	93.0904	0.707269	276.567	2577.26	930.2	0.314443	0.286518	0.553019	0.37685	0.454194	0.436359
	196.232	0.796201	343.969	2372.84	747.601	67.5635	0.720661	248.433	2693.42	902.715	0.261738	0.285105	0.559876	0.375623	0.441838	0.433665
	208.398	0.799465	331.103	2316.35	721.542	83.4896	0.744717	247.02	2479.31	802.164	0.296348	0.270503	0.559212	0.374725	0.478998	0.424604
	250.716	0.812375	363.444	2418.18	739.369	120.119	0.717629	235.561	2455.79	850.319	0.297994	0.262687	0.576757	0.368794	0.456243	0.434907
	247.426	0.769009	349.564	2431.12	821.796	91.4158	0.695319	280.093	2410.87	908.666	0.271447	0.333843	0.53013	0.389883	0.460385	0.435148
	290.842	0.785336	370.501	2578.28	836.666	122.739	0.739161	265.646	2636.62	872.616	0.288505	0.291723	0.532945	0.384662	0.471422	0.426236
	171.93	0.785565	338.212	2488.9	773.632	64.5253	0.752721	197.28	2460.46	741.101	0.290443	0.284925	0.543597	0.380453	0.459065	0.428483
	194.974	0.7853	335.363	2424.9	776.461	69.5746	0.742108	262.14	2478.95	805.162	0.272017	0.29158	0.535183	0.382602	0.490833	0.421903
	292.5	0.817795	340.517	2330.71	698.104	84.4194	0.729272	228.871	2519.34	838.929	0.216942	0.250848	0.585712	0.36529	0.456538	0.433037
	209.466	0.792404	357.7	2359.01	763.166	68.8969	0.736774	229.078	2516.3	812.671	0.253593	0.282944	0.563539	0.375993	0.458172	0.429425
	195.378	0.797875	364.354	2442.22	774.881	68.8285	0.743892	252.427	2701.7	858.834	0.265969	0.274244	0.562389	0.376148	0.4565	0.425308
	199.2	0.773654	318.631	2399.8	779.189	210.582	0.753655	264.204	2471.41	795.827	0.472936	0.301795	0.538786	0.38673	0.500119	0.421261
	267.216	0.828889	371.392	2584.85	745.866	76.9914	0.732364	276.376	2732.46	910.171	0.22669	0.23483	0.578241	0.365424	0.461807	0.427652
	202.647	0.813944	359.766	2421.7	735.302	66.1791	0.716509	265.285	2656.32	926.584	0.235372	0.261853	0.576234	0.36518	0.452689	0.436006
	239.541	0.801506	365.587	2356.78	754.383	63.3394	0.73092	211.451	2614.5	845.048	0.208603	0.273247	0.581682	0.368501	0.450991	0.435474
	210.716	0.772586	361.125	2499.99	837.718	72.2696	0.753079	206.841	2464.96	756.166	0.269571	0.302906	0.529231	0.388973	0.477045	0.429834
	177.821	0.82143	356.639	2380.84	711.99	53.6981	0.704357	306.389	2606.13	957.959	0.22954	0.255987	0.596528	0.36131	0.462307	0.433743
	194.015	0.781027	356.808	2469.55	811.715	54.4462	0.756537	137.684	2049.62	582.421	0.238148	0.289862	0.534158	0.381712	0.451928	0.432899
	216.819	0.775437	380.247	2834.93	923.963	79.4167	0.763664	237.847	2729.65	813.958	0.274904	0.295045	0.490906	0.392662	0.459949	0.421822
	207.068	0.801635	395.421	2717.18	850.078	85.1435	0.732741	254.775	2683.5	893.06	0.28216	0.27146	0.540284	0.379136	0.460191	0.433087
	190.174	0.760208	403.081	2532.42	901.082	69.0698	0.770297	231.277	2648.38	772.772	0.278938	0.313494	0.518121	0.393274	0.455438	0.419403
	219.59	0.798072	372.452	2644.15	825.25	59.47	0.710048	271.962	2800.66	970.89	0.220566	0.287057	0.541644	0.377612	0.427813	0.434301
	210.366	0.776969	373.092	2673.74	872.819	60.2768	0.71888	292.868	2679.1	936.664	0.228247	0.312635	0.512139	0.389315	0.460071	0.430512
	189.023	0.78694	314.411	2285.51	720.194	52.7093	0.742506	246.718	2613.67	836.253	0.255529	0.29075	0.555378	0.374515	0.452673	0.429901
	180.205	0.808593	369.304	2635.59	789.098	52.1098	0.747739	247.755	2647.29	829.148	0.230243	0.258834	0.546154	0.373325	0.462787	0.424824
	204.245	0.805152	349.42	2281.35	722.321	49.4545	0.743228	243.212	2571.35	823.974	0.19862	0.265215	0.594473	0.366596	0.475553	0.433361
	232.653	0.79886	386.33	2624.13	822.474	65.1067	0.731736	260.98	2607.14	863.318	0.219358	0.277085	0.556867	0.376822	0.475296	0.427867
	218.88	0.788772	379.439	2560.69	831.394	64.488	0.729225	237.894	2756.8	832.679	0.235863	0.293186	0.53873	0.382973	0.465008	0.433252
	228.587	0.802345	418.509	2624.57	845.755	63.7769	0.727555	282.868	2698.32	919.966	0.229305	0.273842	0.54832	0.379486	0.454422	0.428679
	146.758	0.786002	414.49	2950.75	937.921	59.6953	0.771571	221.965	2569.73	733.639	0.288724	0.278825	0.505853	0.385863	0.484995	0.416699
	192.417	0.773407	372.837	2530.22	844.568	71.2667	0.732693	254.544	2272.73	775.275	0.275407	0.312147	0.51939	0.386363	0.511889	0.420723
	171.919	0.780798	347.283	2554.18	815.185	54.0508	0.740643	224.654	2551.82	799.883	0.247543	0.301209	0.523094	0.3841	0.464447	0.429377
	212.19	0.781075	382.655	2633.35	866.197	73.9487	0.785314	261.411	2594.44	744.456	0.267638	0.28028	0.51689	0.388113	0.500091	0.406376
	197.58	0.803541	371.872	2614.75	795.524	52.0133	0.742523	265.984	2542.04	817.84	0.21391	0.26775	0.558414	0.374018	0.46754	0.422648
	141.157	0.789161	377.452	2631.97	835.539	44.8621	0.761138	226.059	2444	723.701	0.249069	0.280196	0.543782	0.37789	0.488321	0.416781
	182.164	0.827055	372.77	2612.95	754.706	54.6339	0.752858	236.151	2584.17	797.59	0.236837	0.229932	0.575794	0.364476	0.484586	0.424161
	138.647	0.783061	367.219	2593.77	833.335	112.725	0.777245	239.813	2512.72	722.734	0.339018	0.280947	0.539778	0.384678	0.505296	0.412375
	164.769	0.820757	417.568	3077.43	881.795	43.517	0.727099	247.06	2592.42	849.273	0.211655	0.250517	0.538191	0.370848	0.474425	0.427573
	156.081	0.793529	405.365	2858.97	896.851	41.5705	0.763172	228.235	2513.06	743.426	0.21695	0.272067	0.526002	0.381897	0.490636	0.418694
	167.747	0.765268	388.207	2428.07	851.521	48.2069	0.769981	230.39	2411.32	707.574	0.230461	0.306588	0.54122	0.386819	0.52035	0.414983
	125.876	0.760971	374.494	2687.51	896.112	46.2419	0.778727	267.165	2559.76	747.672	0.272698	0.307754	0.506362	0.392359	0.517998	0.408185
	196.993	0.807847	379.246	2494.67	774.098	49.8824	0.788232	228.583	2446.89	676.623	0.210116	0.245094	0.575924	0.371374	0.520039	0.405076
	135.842	0.799387	373.125	2840.78	839.827	51.7074	0.773046	219.694	2319.38	672.934	0.274926	0.259959	0.52613	0.376047	0.532944	0.410353
	124.67	0.776477	413.105	2686.8	901.761	42.3962	0.785371	222.075	2607.28	706.325	0.253003	0.286616	0.519933	0.388432	0.508687	0.409406
	183.962	0.807761	378.523	2771.31	827.551	48.5606	0.765619	236.722	2696.32	775.086	0.206428	0.253796	0.526518	0.375444	0.472805	0.414608
	159.988	0.780334	420.475	2794.79	926.917	43.6	0.768472	229.548	2637.18	755.762	0.217659	0.28843	0.512513	0.385766	0.484801	0.41957
	163.461	0.795048	427.542	2756.96	884.299	47.4934	0.766158	247.526	2516.41	726.614	0.236489	0.272436	0.5495	0.378793	0.502121	0.413189
	178.249	0.797161	409.726	2714.55	858.001	41.4873	0.772771	235.819	2718.8	766.492	0.198574	0.265583	0.554795	0.377891	0.475723	0.416262
	133.648	0.802618	381.962	2680.17	811.918	40.0552	0.77065	246.388	2603.71	744.627	0.229712	0.258586	0.570049	0.372035	0.519499	0.409925
	148.443	0.806892	427.074	2893.43	890.584	37.6798	0.77744	251.664	2773.32	778.4	0.207811	0.251484	0.544975	0.377081	0.484827	0.4125
	135.733	0.780848	352.472	2419.32	786.274	35.9333	0.778218	258.765	2448.52	704.826	0.212186	0.284642	0.560682	0.380329	0.526094	0.400624
	109.233	0.822139	392.076	2792.97	798.892	28.9223	0.818463	207.052	2808.27	648.167	0.218086	0.218477	0.566297	0.364761	0.468877	0.407238
	131.701	0.819867	403.61	2648.27	798.104	34.1149	0.786523	215.629	2399.67	649.471	0.208049	0.231685	0.57852	0.370367	0.519015	0.410478
	158.701	0.812912	413.128	2633.56	818.175	36.8977	0.782937	245.102	2639.08	742.403	0.193501	0.240582	0.578036	0.370989	0.498129	0.413205
	140.66	0.778208	381.094	2564.25	839.81	33.7113	0.767676	199.633	2194.35	628.752	0.192642	0.290538	0.548613	0.383343	0.535345	0.406967
	145.554	0.807098	427.31	2667.77	845.982	36	0.775223	279.21	2842.1	789.865	0.202403	0.252362	0.56835	0.375847	0.508283	0.406256
	113.571	0.826125	381.749	2693.29	766.141	32.8824	0.778403	200.883	2125.41	602.809	0.224175	0.225765	0.591954	0.361353	0.535802	0.404107
	96.3661	0.799549	384.388	2586.58	797.592	33.5714	0.76313	231.425	2339.67	705.55	0.26052	0.263653	0.567867	0.371993	0.51665	0.410571
	133.768	0.82002	433.98	2951.9	866.089	30.6059	0.785318	206.484	2386.69	646.028	0.189972	0.231095	0.556087	0.3725	0.517088	0.409603
	98.839	0.811432	417.04	2840.21	844.13	36.3902	0.779335	236.177	2435.77	677.646	0.266753	0.244594	0.564799	0.370498	0.543872	0.404839
	97.5659	0.791361	409.257	2993.31	922.482	35.8626	0.780889	226.7	2257.96	637.046	0.298232	0.272013	0.515383	0.38382	0.545458	0.399298
	124.275	0.777137	427.525	2728.41	924.186	29.9565	0.798049	203.806	2527.99	648.534	0.205787	0.280427	0.533554	0.389712	0.502751	0.40795
	134.669	0.826012	454.367	3010.44	884.332	34.9657	0.767379	229.292	2451.89	710.318	0.217986	0.228334	0.559883	0.369958	0.518637	0.415107
	101.983	0.793068	445.702	3080.21	967.319	29.1379	0.765843	234.761	2428.25	697.784	0.225001	0.273948	0.519627	0.383569	0.511123	0.405253
	91.4709	0.800325	406.943	2878.21	883.478	28.6984	0.790902	286.691	2674.44	729.402	0.239993	0.256523	0.533069	0.379211	0.542294	0.397361
	96.9945	0.799489	432.092	2996.32	911.687	35.9779	0.786638	223.722	2376.78	646.389	0.271846	0.256836	0.526953	0.376036	0.544577	0.402602
	92.607	0.79669	442.968	3033.28	929.752	34.3799	0.787993	248.211	2696.31	721.871	0.266174	0.26081	0.540166	0.377295	0.523368	0.40423
	137.281	0.803877	429.455	3040.31	923.986	31.6619	0.791943	280.23	2691.9	747.507	0.194573	0.248066	0.52771	0.378026	0.521692	0.402621
	75.1407	0.784201	463.772	3102.42	994.666	24.7588	0.757659	220.798	2297.4	679.573	0.249091	0.289761	0.515146	0.385332	0.537119	0.415025
	87.8852	0.819861	500.196	3291.48	970.196	27.2951	0.783882	288.926	2649.06	731.892	0.234543	0.234615	0.54553	0.372592	0.529474	0.400198
	94.2427	0.78723	444.269	3127.81	976.953	26.4951	0.786755	240.776	2544.84	683.491	0.221884	0.273622	0.514527	0.386935	0.524975	0.403072
test_2022_05_05_14_35	210.754	0.819877	431.718	2854.83	860.483	108.178	0.69677	248.074	2630.68	955.132	0.343519	0.259463	0.566625	0.369146	0.408703	0.460461
test_2022_05_05_14_36	208.996	0.8276	377.267	2691.59	769.511	84.9772	0.688524	249.521	2692.83	976.432	0.299579	0.252417	0.570512	0.364799	0.410117	0.462793
	207.398	0.802633	403.612	2640.29	829.366	95.5929	0.693065	260.778	2761.48	1014.07	0.327523	0.285932	0.566942	0.373392	0.39607	0.461644
	216.371	0.795788	392.05	2678.41	838.213	86.7321	0.703753	244.216	2554.13	898.04	0.287306	0.296426	0.543545	0.376792	0.426464	0.458985
	262.556	0.826098	396.38	2978.15	829.08	119.836	0.730027	240.471	2581.71	858.458	0.300401	0.239252	0.535462	0.365494	0.424275	0.453324
	286.315	0.798421	383.46	2864.54	877.049	145.787	0.704417	231.107	2253.52	818.573	0.323806	0.28715	0.511368	0.380941	0.445108	0.459619
	293.119	0.807446	327.218	2326.63	701.096	101.966	0.713261	258.852	2675.8	941.107	0.259061	0.269893	0.583696	0.365931	0.426432	0.457672
	264.948	0.790095	407.423	2879.69	909.884	122.284	0.698086	267.573	2585.21	952.301	0.32612	0.30259	0.522972	0.38258	0.422212	0.458856
	204.352	0.810955	387.892	2761.97	825.768	76.4091	0.708705	217.096	2390.08	831.043	0.276656	0.268478	0.528849	0.37228	0.429855	0.461244
	196.102	0.787005	383.745	2901.83	894.604	86.5182	0.728846	250.471	2601.26	867.759	0.306546	0.295674	0.520804	0.382362	0.425055	0.453346
	242.691	0.815539	402.286	3048.49	879.194	86.374	0.72054	259.834	2561.49	879.139	0.269516	0.257072	0.519349	0.371693	0.432578	0.451701
	256.422	0.803835	402.739	2865.46	879.557	107.551	0.709162	279.74	2627.32	940.634	0.297476	0.278272	0.537454	0.377488	0.434896	0.454417
	241.512	0.792845	393.043	2702.74	858.641	92.1593	0.729855	250.769	2624.9	878.226	0.283103	0.28466	0.535485	0.379678	0.436303	0.453309
	247.714	0.806765	430.901	2840.68	887.922	97.4454	0.714002	262.062	2634.61	918.885	0.282884	0.271372	0.538406	0.377287	0.427533	0.455883
	186.353	0.80459	345.22	2468.14	745.098	62.6807	0.705111	261.699	2453.26	868.717	0.261684	0.280485	0.553939	0.37441	0.447524	0.455779
	214.026	0.813651	359.354	2701.1	786.64	60.2908	0.738881	213.18	2432.07	760.77	0.225892	0.255796	0.561397	0.371677	0.435891	0.450982
	211.393	0.798106	413.119	2885.07	897.777	81.3541	0.708997	258.626	2525.3	888.008	0.283747	0.288409	0.532502	0.379248	0.441674	0.455788
	210.684	0.797446	396.935	2594.74	828.013	67.0936	0.738989	220.709	2628.46	825.451	0.253258	0.275797	0.556507	0.376714	0.416552	0.451681
	200.22	0.769632	389.803	2666.66	895.5	78.7967	0.707115	260.276	2695.03	959.856	0.292074	0.329552	0.520399	0.388877	0.420886	0.456998
	227.171	0.762403	437.844	2911.51	1013.03	107.925	0.713281	252.029	2538.9	891.579	0.319785	0.335735	0.490016	0.394602	0.440232	0.45724
	197.232	0.774685	440.961	2781.12	949.843	70.2526	0.739037	186.516	2194.23	690.083	0.265863	0.308747	0.517522	0.38958	0.472488	0.452249
	225	0.801502	383.908	2675.4	827.023	71.0854	0.720659	238.38	2389.4	821.436	0.246561	0.278507	0.553925	0.374528	0.447863	0.454908
	233.227	0.802368	373.421	2535.94	793.978	76.6989	0.742697	258.47	2549.11	825.467	0.252121	0.267652	0.559368	0.37491	0.451965	0.447522
	237.211	0.761463	439.921	2852.36	999.407	85.2719	0.745426	212.965	2277.86	723.695	0.267831	0.322027	0.509134	0.393477	0.487129	0.450245
	206.481	0.810897	340.908	2451.24	733.373	56.8241	0.703183	238.686	2896.53	905.895	0.221485	0.273177	0.590185	0.370093	0.430862	0.463358
	171.074	0.801726	385.623	2839.92	865.079	61.2843	0.774433	217.622	2638.08	743.181	0.275636	0.257447	0.53381	0.37692	0.432839	0.438658
	251.825	0.824784	373.38	2759.05	783.403	60.5974	0.698801	237.114	2433.12	884.994	0.197772	0.253047	0.561302	0.366853	0.443074	0.465031
	171.519	0.805615	392.135	2662.01	818.754	66.0519	0.738849	227.109	2339.42	763.234	0.28689	0.26605	0.548608	0.377125	0.459594	0.454363
	202.844	0.810534	399.6	2677.79	813.3	64.5208	0.749263	218.682	2526.43	779.936	0.247771	0.255124	0.561448	0.37155	0.445223	0.450964
	170.066	0.798783	378.538	2443.32	779.908	62.3553	0.757014	228.017	2558.68	777.853	0.270455	0.267519	0.567734	0.37514	0.456132	0.451591
	176.473	0.805591	423.942	2718.37	849.053	63.9863	0.720803	244.374	2576.26	873.614	0.269327	0.273194	0.565941	0.371116	0.427506	0.458186
	186.142	0.812476	396.068	2726.72	820.078	71.5906	0.712426	199.095	2093.37	730.59	0.288074	0.264113	0.548579	0.373821	0.46719	0.457798
	217.752	0.809072	394.278	2613.08	806.647	64.9256	0.721124	222.597	2400.46	797.699	0.233663	0.267084	0.563553	0.372211	0.457624	0.452656
	301.308	0.805688	373.238	2733.49	826.525	70.8718	0.701616	278.074	2379.13	871.11	0.194004	0.280762	0.546089	0.376575	0.458791	0.454815
	264.804	0.810298	365.105	2543.07	767.566	76.9689	0.728678	250.543	2506.49	839.684	0.229974	0.262392	0.565152	0.370921	0.450799	0.451827
	250.448	0.810377	399.352	2917.53	864.962	58.5622	0.730929	270.78	2696.32	886.819	0.19705	0.262871	0.540133	0.374414	0.435141	0.449195
	216.305	0.805957	414.117	2735.2	849.916	54.4068	0.758691	199.179	2389.8	702.829	0.212084	0.258613	0.554176	0.374782	0.446052	0.449097
	173.135	0.81489	435.667	2793.45	855.783	47.381	0.755107	232.811	2624.72	802.221	0.214559	0.247152	0.562783	0.371186	0.451245	0.448331
	199.778	0.826011	386.81	2693.43	779.106	52.1565	0.758937	245.27	2547.56	767.186	0.211499	0.230827	0.582825	0.363546	0.464447	0.442004
	207.415	0.81059	417.439	2916.3	878.493	50.4146	0.746341	233.109	2486.23	787.582	0.198877	0.255632	0.544024	0.373701	0.441566	0.451425
	215.236	0.802748	422.954	2812.72	882.235	54.6533	0.740267	209.707	2506.1	779.404	0.20804	0.267908	0.543283	0.377469	0.444429	0.452584
	220.979	0.795201	409.982	2713.49	862.908	57.5704	0.750297	233.087	2520.86	780.498	0.214452	0.275732	0.546503	0.378135	0.453776	0.446882
	216.846	0.800435	421.745	2805.91	883.331	52.9675	0.758145	210.67	2503.63	737.672	0.20538	0.265059	0.544907	0.377872	0.450125	0.444772
	203.714	0.811264	419.141	2908.65	872.705	55.5217	0.747502	219.817	2127.6	673.397	0.217064	0.25594	0.544	0.375412	0.488439	0.43938
	197.657	0.804258	421.102	3001.41	909.773	55.8952	0.711549	231.33	2423.4	838.338	0.227495	0.279287	0.530898	0.377643	0.449201	0.458719
	248.919	0.794085	427.154	2908.79	921.07	69.223	0.742357	234.776	2332.65	751.934	0.220247	0.278581	0.525948	0.382902	0.485727	0.446798
	200.397	0.811815	412.058	2779.24	852.114	50.5205	0.75095	246.969	2572.6	803.445	0.207509	0.252697	0.54882	0.375005	0.473393	0.445184
	208.877	0.799575	389.209	2579.08	806.786	56.6231	0.75299	246.579	2347.46	739.134	0.216094	0.268567	0.564659	0.37267	0.467216	0.440099
	170.128	0.814017	406.024	2852.04	847.437	44.1218	0.74407	186.143	2198.05	672.385	0.21462	0.252243	0.554124	0.370659	0.452507	0.44908
	159.35	0.816068	410.796	2742.74	823.285	46.1975	0.784473	209.669	2654.25	720.237	0.221496	0.235464	0.563818	0.368361	0.44631	0.441842
	224.909	0.80433	422.198	2732.74	861.963	62.522	0.736892	249.801	2391.9	791.187	0.219294	0.268637	0.554839	0.377527	0.468706	0.44591
	228.754	0.804655	371.098	2570.26	786.397	76.5282	0.751043	247.824	2477.19	784.691	0.236401	0.263714	0.562655	0.371178	0.463005	0.447868
	221.362	0.81683	413.237	2904.47	860.006	60.2896	0.741265	255.869	2443.71	791.659	0.223882	0.248551	0.549018	0.370832	0.470126	0.445149
	193.578	0.83375	406.61	2776.07	784.122	46.3478	0.760267	218.239	2414.54	719.405	0.191144	0.219337	0.583269	0.359405	0.486487	0.44113
	211.277	0.830524	425.953	2813.13	822.341	50.521	0.766016	230.838	2442.21	727.305	0.19601	0.222146	0.583076	0.361776	0.477207	0.439561
	216.937	0.79827	432.242	2809.07	895.647	58.6964	0.760414	248.495	2331	724.248	0.215982	0.267901	0.539083	0.3798	0.494492	0.438617
	189.826	0.829128	405.713	2715.86	789.476	46	0.774235	225.094	2583.88	731.264	0.198757	0.222159	0.584493	0.364489	0.462396	0.437694
	220.716	0.83912	401.722	2857.6	783.367	50.791	0.736593	247.569	2294.16	761.834	0.187303	0.220284	0.581014	0.357752	0.507291	0.450109
	238.7	0.83905	430.994	3008.22	842.87	48.3286	0.740203	264.984	2490.2	805.803	0.171157	0.218481	0.557719	0.3644	0.475592	0.441084
	195.358	0.773722	431.114	2951.03	986.203	47.9877	0.772739	283.934	2639.83	786.814	0.208553	0.294906	0.503134	0.390883	0.493503	0.433969
	145.484	0.768875	393.907	2720.21	886.536	46.9946	0.747709	251.565	2531.79	796.382	0.249332	0.310595	0.531626	0.385512	0.469095	0.446639
	185.407	0.826108	450.062	3106.18	897.82	43.0909	0.736478	217.271	2417.05	755.976	0.190672	0.241906	0.554306	0.368536	0.47878	0.450535
	222.823	0.799715	428.371	2988.95	929.662	49.3427	0.744038	207.514	2227.63	691.601	0.186452	0.272022	0.52744	0.380347	0.482428	0.446799
	181.944	0.806211	404.977	2804.3	856.453	46.1481	0.772948	249.831	2476.99	731.904	0.203956	0.252679	0.555321	0.374836	0.501163	0.434541
	156.307	0.790113	434.135	2905.94	934.644	39.9755	0.769953	194.689	2197.82	629.584	0.208065	0.274657	0.530023	0.380638	0.48213	0.436836
	206.972	0.847782	453.735	2886.49	819.869	43.3757	0.766856	220.495	2345.27	685.167	0.174456	0.200536	0.596427	0.358246	0.49937	0.436923
	197.226	0.798895	420.105	2832.88	893.058	51.3303	0.779244	218.508	2321.33	656.068	0.202542	0.25968	0.543548	0.379371	0.50414	0.43452
	156.336	0.826743	473.037	3094.1	902.997	38.5776	0.787028	220.301	2695.47	716.653	0.207455	0.221877	0.560017	0.369334	0.459413	0.439899
	120.265	0.829604	417.723	2839.31	811.952	30.2402	0.757046	228.673	2386.3	701.744	0.206452	0.232011	0.588799	0.364297	0.479139	0.439609
	150.26	0.84167	442.744	3219.65	870.586	38.9315	0.777773	273.959	2602.27	766.857	0.204637	0.205502	0.561873	0.359854	0.496034	0.437047
	182.361	0.803132	448.461	2984.13	930.594	39.2083	0.723526	202.673	2092.23	663.922	0.185923	0.281386	0.545842	0.379666	0.502093	0.435728
	167.224	0.835549	423.768	2910.16	819.91	28.9792	0.799575	208.414	2620.35	653.036	0.153407	0.205939	0.580651	0.360067	0.467736	0.432039
	144.635	0.796135	473.983	3136.4	997.545	37.8073	0.782227	253.14	2704.1	722.558	0.216129	0.264133	0.526852	0.382503	0.478084	0.427032
	169.467	0.80446	397.605	2925.05	874.895	29.6075	0.800797	213.985	2813.21	698.409	0.156038	0.2459	0.546013	0.373669	0.444237	0.437424
	158.714	0.81895	413.198	3161.85	896.442	39.6391	0.794698	202.616	2536.06	658.178	0.204794	0.228504	0.540605	0.371197	0.458544	0.438009
	187.899	0.787574	442.56	2869.4	943.999	43.8389	0.77921	271.434	2397.17	720.771	0.196268	0.273989	0.536131	0.384959	0.510025	0.430502
	169.068	0.822594	450.003	3131.17	914.827	37.9359	0.767482	279.454	2664.09	789.009	0.187877	0.234746	0.556272	0.370881	0.485662	0.438228
	141.752	0.789476	472.179	3057.79	1002.19	35.7699	0.778359	273.782	2605.47	741.34	0.204502	0.273162	0.533394	0.3849	0.498252	0.426858
	144.852	0.827913	454.446	3068.61	885.688	31.3304	0.762666	225.702	2417.34	707.082	0.176056	0.229207	0.563419	0.366784	0.491748	0.443935
	133.951	0.78334	486.219	3369.02	1071.09	36.734	0.773584	227.235	2396.1	684.852	0.212247	0.28441	0.500648	0.385752	0.500252	0.432587
	156.193	0.813445	453.31	3152.56	938.113	29.2624	0.779457	232.472	2631.94	702.096	0.160563	0.243044	0.534737	0.375154	0.483051	0.43739
	111.909	0.798378	437.456	2949.65	914.099	23.9293	0.774678	254.985	2412.53	668.427	0.176767	0.268214	0.555877	0.376992	0.516521	0.427743
	123.727	0.805269	437.864	3137.88	955.072	21.5867	0.772342	197.578	2432.54	662.785	0.155511	0.256208	0.526958	0.379083	0.467689	0.436993
	118.462	0.829081	495.338	3605.03	1004.86	23.8897	0.775506	223.857	2577.59	724.93	0.175603	0.223155	0.525766	0.37105	0.45792	0.443933
	110.504	0.791476	437.677	2941.62	944.422	35.9078	0.759251	222.67	2135.95	660.136	0.245284	0.279883	0.530592	0.384928	0.535792	0.438365
	114.682	0.822216	476.435	3371.58	970.255	24.9225	0.777888	245.364	2562.02	722.483	0.182703	0.230075	0.533392	0.371739	0.496999	0.439202
	115.301	0.815632	500.685	3458.06	1025.06	25.1928	0.787523	256.896	2643.65	719.865	0.184578	0.234547	0.526841	0.375274	0.46537	0.429368
	99.3671	0.794303	464.649	3285.97	1006.3	32.6923	0.791046	216.755	2293.56	616.623	0.244111	0.262583	0.51555	0.381288	0.515104	0.427027
	112.93	0.809153	501.163	3260.12	1003.54	24.6121	0.790456	229.8	2503.14	658.687	0.184303	0.245635	0.546829	0.379057	0.500424	0.430874
test_2022_05_05_14_38	253.203	0.804051	332.476	2461.72	741.19	110.82	0.718066	155.582	2212.92	720.606	0.305982	0.274236	0.556818	0.375042	0.438327	0.455978
test_2022_05_05_14_39	248.642	0.805313	352.956	2418.78	748.916	107.306	0.718002	192.583	2290.68	772.423	0.302341	0.272466	0.571496	0.370869	0.446094	0.451538
	191.326	0.794987	400.451	2797.13	880.077	89.1771	0.735753	178.553	2352.12	741.765	0.328526	0.279812	0.523792	0.383083	0.449738	0.451495
	182.877	0.769425	339.47	2292.44	774.878	106.301	0.754466	162.262	2165.04	645.543	0.373994	0.306995	0.542054	0.386384	0.460155	0.444557
	247.831	0.790612	413.696	2855.11	912.013	110.037	0.735681	177.48	2255.26	717.407	0.305612	0.285929	0.518172	0.383269	0.448963	0.450442
	134.292	0.752674	367.892	2612.56	891.659	81.0849	0.776284	122.279	2211.27	570.901	0.451369	0.318642	0.520866	0.39309	0.43923	0.448789
	196.146	0.777072	341.475	2407.19	785.684	113.24	0.747529	177.515	2281.37	698.045	0.369004	0.29939	0.523736	0.384029	0.455446	0.443757
	231.577	0.773354	334.279	2331.91	773.442	101.477	0.756682	148.984	2103.79	617.532	0.315829	0.300683	0.542352	0.383759	0.462165	0.445366
	193.229	0.805644	415.494	2773.28	857.744	83.6972	0.759622	156.665	2202.57	640.012	0.311931	0.256214	0.543545	0.377429	0.467933	0.446005
	231.752	0.804589	381.99	2576.96	800.783	100.372	0.756459	174.907	2358.18	697.923	0.303941	0.259668	0.551475	0.373124	0.450353	0.447364
	233.573	0.793927	373.502	2503.81	802.833	102.825	0.756766	170.456	2409.43	708.005	0.312781	0.274267	0.549858	0.381192	0.442528	0.446064
	220.341	0.772702	350.705	2486.77	817.573	112.476	0.727457	209.017	2246.13	753.477	0.344496	0.313398	0.514835	0.38859	0.452725	0.445513
	241.331	0.777193	360.719	2595.85	838.195	102.381	0.732599	181.688	2209.09	713.494	0.3052	0.30509	0.520441	0.385716	0.458027	0.448494
	255.496	0.817048	354.242	2540.05	750.59	73.7664	0.734774	172.952	2142.54	673.201	0.23243	0.250928	0.576138	0.368719	0.455294	0.44394
	210.423	0.798074	391.66	2726.96	844.519	79.545	0.730785	171.689	2190.86	695.55	0.275527	0.278792	0.536526	0.3777	0.452681	0.448853
	267.623	0.795257	366.001	2471.44	785.897	100.652	0.725423	153.331	2055.27	665.236	0.27551	0.283369	0.563837	0.378164	0.452509	0.452554
	134.772	0.791796	364.224	2645.75	806.888	99.6618	0.777858	138.262	2242.01	593.1	0.429299	0.267574	0.548352	0.376537	0.442498	0.442597
	253.57	0.813505	345.924	2373.15	714.978	76.4507	0.766297	164.089	2348.73	661.138	0.231076	0.244315	0.582838	0.366392	0.447642	0.443164
	227.49	0.782181	364.902	2631.08	849.167	78.235	0.725869	202.617	2255.19	749.14	0.285367	0.303318	0.525273	0.385927	0.450648	0.447396
	254.518	0.806356	333.648	2348.06	718.342	88.5181	0.730377	227.715	2352.55	786.125	0.256978	0.2665	0.572676	0.372033	0.461377	0.444669
	178.302	0.797627	376.421	2526.22	793.21	54.381	0.797228	166.202	2425.37	617.631	0.245086	0.253798	0.563711	0.373846	0.453367	0.440327
	221.562	0.80737	412.384	2722.74	845.124	64.0375	0.780471	154.296	2371.76	628.977	0.232422	0.247065	0.554574	0.375694	0.463763	0.443503
	209.276	0.805816	389.01	2725.4	833.694	73.651	0.750043	154.415	2211.45	658.131	0.263367	0.261174	0.54512	0.376083	0.464181	0.448798
	245.884	0.795041	344.441	2385.63	753.925	119.113	0.739353	181.508	2238.29	706.822	0.321159	0.279123	0.557336	0.376787	0.449501	0.445479
	221.689	0.816938	391.542	2704.83	798.437	58.9508	0.743501	161.626	2062.67	643.805	0.212781	0.247686	0.556286	0.371124	0.449778	0.445219
	228.492	0.803179	369.333	2483.46	769.685	81.4385	0.757609	155.702	2203.86	634.158	0.271438	0.261383	0.567439	0.369577	0.45589	0.445931
	174.979	0.801778	349.652	2463.58	759.21	56.3093	0.744501	172.317	2332.22	704.44	0.25201	0.268196	0.567	0.372113	0.439389	0.448882
	224.215	0.781517	430.427	2806.75	934.19	83.0054	0.743791	143.907	2169.27	649.958	0.275691	0.295985	0.522334	0.386459	0.451233	0.448989
	225.401	0.799588	382.179	2748.17	848.894	70.3911	0.74453	178.214	2351.23	719.828	0.246658	0.270516	0.536997	0.379431	0.443354	0.448243
	177.908	0.803864	400.717	2981.11	890.143	58.4145	0.748771	161.545	2073.94	628.67	0.250789	0.264367	0.522422	0.378699	0.474336	0.444998
	211.831	0.802624	377.916	2694.79	821.522	78.7093	0.734275	195.836	2211.4	713.578	0.278229	0.269966	0.543541	0.375693	0.461306	0.443161
	233.073	0.790651	360.085	2489.22	800.558	66.5474	0.73537	170.592	2189.26	685.328	0.228344	0.286357	0.556783	0.379444	0.461791	0.446948
	172.849	0.794006	403.305	2832.4	869.429	49.6509	0.749531	153.236	2010.09	603.53	0.230221	0.278442	0.540009	0.377756	0.475869	0.439192
	142.402	0.806948	348.626	2699.91	782.404	51.5747	0.777426	161.857	2412.79	639.064	0.327148	0.249349	0.554799	0.373623	0.447486	0.444166
	285.893	0.784341	403.299	2731.68	893.589	103.913	0.742305	204.036	2369.76	750.499	0.278609	0.2927	0.514713	0.385803	0.465429	0.444181
	193.422	0.77804	390.518	2688.26	884.155	66.5522	0.777142	150.14	2243.92	606.16	0.266898	0.287566	0.517501	0.385648	0.464845	0.440848
	200.79	0.806673	368.396	2552.46	775.121	65.7593	0.761728	160.263	2286.62	652.038	0.25154	0.25539	0.562977	0.371694	0.447882	0.443973
	203.664	0.805833	357.849	2647.52	783.683	65.9244	0.776096	150.849	2229.34	602.309	0.244023	0.250856	0.5541	0.373254	0.477714	0.438442
	222.442	0.816848	372.922	2699.59	782.598	79.9505	0.755477	188.612	2222.43	670.097	0.261368	0.24479	0.558642	0.367686	0.481178	0.436286
	219.718	0.820172	377.439	2629.11	775.785	76.3397	0.759967	173.929	2204.56	647.576	0.252881	0.237923	0.576649	0.367712	0.476285	0.43708
	242.307	0.809159	385.247	2780.66	833.142	73.8	0.770952	171.572	2363.17	663.048	0.24867	0.248688	0.548053	0.37262	0.454973	0.438775
	172.607	0.822192	390.963	2949.19	821.254	65.2345	0.781876	152.433	2066.26	558.318	0.285343	0.229747	0.537726	0.368053	0.476664	0.434047
	222.489	0.83052	415.397	3070.38	857.859	102.644	0.765803	186.652	2279.9	671.035	0.31555	0.222165	0.522978	0.368813	0.473596	0.439045
	211.802	0.808702	390.361	2639.1	814.299	60.7099	0.741199	203.589	2226.02	706.654	0.233549	0.259767	0.563067	0.372374	0.476011	0.442967
	223.802	0.796416	370.562	2496.38	786.984	67.9695	0.748467	182.761	2133.23	660.92	0.245507	0.273698	0.550215	0.376863	0.481207	0.441082
	211.029	0.807078	399.432	2793.38	846.795	63.4712	0.751367	195.201	2265.74	693.622	0.237629	0.258599	0.550571	0.375068	0.482252	0.439014
	202.24	0.819574	370.852	2693.45	774.109	77.4959	0.769289	171.59	2143.66	612.404	0.257934	0.235106	0.560513	0.365826	0.48055	0.434299
	266.642	0.816339	434.773	3022.9	903.869	78.0753	0.752977	161.816	2152.76	634.66	0.231275	0.245967	0.532313	0.37389	0.473368	0.442935
	200.197	0.810561	366.157	2573.83	765.665	59.2048	0.757107	202.302	2138.32	648.019	0.229189	0.252456	0.568412	0.368494	0.502118	0.427794
	244.338	0.813945	384.696	2743.9	807.055	58.6276	0.759974	194.746	2331.2	697.249	0.197393	0.244923	0.548733	0.37175	0.468041	0.439011
	248.928	0.820256	378.839	2521.68	755.01	64.552	0.779749	203.168	2301.01	650.635	0.205136	0.231552	0.581077	0.36522	0.499377	0.43091
	212.278	0.834105	402.962	2906.4	804.467	52.306	0.779323	136.483	2148.01	570.33	0.208048	0.213977	0.566794	0.363053	0.460243	0.443909
	232.934	0.805883	390.37	2757.95	843.698	70.1983	0.750829	172.343	2045.6	623.497	0.231285	0.259579	0.537612	0.376295	0.487307	0.437172
	216.151	0.780662	427.219	2796.83	929.271	66.3108	0.769298	187.478	2203.62	636.707	0.239094	0.287078	0.521755	0.386473	0.482901	0.435261
	199.455	0.764556	393.256	2694.87	910.611	76.9901	0.760438	138.246	2021.47	575.407	0.283333	0.30983	0.518749	0.389979	0.488214	0.440711
	214.706	0.819344	412.598	2945.33	859.854	58.4	0.775203	148.988	2117.71	570.201	0.214497	0.235101	0.552044	0.371548	0.482074	0.437817
	188.838	0.807624	409.639	2775.43	848.405	56.3675	0.787392	179.946	2328.74	618.953	0.240466	0.24462	0.542266	0.373406	0.495034	0.428595
	217.575	0.81854	397.925	2821.82	819.028	52.1803	0.779847	172.758	2450.13	660.436	0.204155	0.234916	0.565083	0.367535	0.45344	0.438393
	233.874	0.801916	403.282	2666.44	839.442	62.4945	0.784809	190.096	2252.87	616.244	0.208882	0.252617	0.554622	0.376773	0.496905	0.430891
	227.782	0.797311	426.756	2923.19	913.521	73.0887	0.752258	205.083	2216.26	685.652	0.240819	0.271015	0.524077	0.380102	0.487539	0.435115
	183.567	0.793186	421.249	3013.94	942.845	68.9724	0.771147	170.467	2228.99	632.43	0.27691	0.269532	0.516134	0.382676	0.477444	0.439363
	182.445	0.791668	404.338	2943.34	914.409	54.3224	0.77591	156.763	2266.77	610.424	0.264349	0.269599	0.524147	0.38368	0.466286	0.436186
	183.351	0.822372	408.347	3073.88	869.221	50.6093	0.802657	171.247	2321.02	582.141	0.222412	0.222445	0.541523	0.369646	0.476522	0.430995
	159.223	0.806887	410.058	2774.07	846.993	46.8808	0.77964	198.6	2333.83	652.544	0.232225	0.249389	0.551068	0.375403	0.488124	0.431038
	109.629	0.774704	368.765	2763.24	883.413	42.2971	0.814427	137.724	2201.9	499.116	0.344158	0.278011	0.51304	0.387906	0.458571	0.425231
	180.872	0.811577	413.341	2866.22	858.47	61.5546	0.791885	176.756	2202.2	582.261	0.299987	0.237486	0.550426	0.373076	0.496274	0.425495
	195.574	0.817378	421.219	2766.73	840.297	54.5838	0.740762	212.409	2057.07	675.018	0.219411	0.249931	0.564438	0.371698	0.493617	0.435325
	214.231	0.81887	433.241	2833.03	854.399	61.3519	0.759233	185.842	2179.99	651.383	0.225373	0.239724	0.570025	0.371528	0.485677	0.43472
	141.709	0.849195	408.743	2954.08	785.149	37.4701	0.791107	185.305	2179.22	573.989	0.213565	0.193951	0.589413	0.353399	0.473899	0.433704
	208.701	0.8137	404.714	2924.82	861.575	44.0833	0.78957	171.608	2317.98	606.458	0.179497	0.237366	0.54896	0.372584	0.475166	0.4296
	159.328	0.798438	430.318	2974.15	924.837	41.6772	0.79655	182.128	2236.34	593.233	0.209363	0.253627	0.521527	0.37984	0.503797	0.427924
	177.345	0.809643	442.955	2951.79	912.096	48.0855	0.781931	178.342	2217.83	601.037	0.215265	0.247405	0.544458	0.374188	0.498187	0.428813
	182.831	0.815338	411.53	2766.35	826.038	48.6923	0.777295	204.459	2292.05	654.856	0.215354	0.237545	0.563309	0.368451	0.492586	0.428583
	188.422	0.79806	371.821	2716.72	829.84	49.9217	0.781891	195.152	2280.14	637.699	0.218176	0.259538	0.542802	0.377655	0.482172	0.428732
	208.633	0.806634	413.244	2880.82	870.589	42.518	0.755919	178.134	2087.01	624.731	0.175829	0.258588	0.53565	0.377386	0.500963	0.439136
	177.374	0.801411	473.006	3108.41	983.479	45.6835	0.790745	204.856	2362.72	635.536	0.21057	0.253119	0.519467	0.379327	0.482869	0.429217
	142	0.805717	463.339	3116.45	961.665	37.2154	0.752671	180.818	2131.26	638.922	0.21148	0.259922	0.531183	0.37865	0.491769	0.435255
	115.706	0.784132	431.103	2839.55	931.293	44.5539	0.791063	181.214	2030.47	549.382	0.273066	0.274168	0.534529	0.383792	0.536158	0.421283
	147.772	0.8127	467.646	3069.25	922.743	42.2822	0.797527	164.88	2331.18	585.588	0.224115	0.236224	0.54982	0.373383	0.494928	0.429286
	182.393	0.786819	437.598	2871.38	943.266	44.9	0.79161	181.678	2261.92	587.901	0.200554	0.272012	0.53125	0.385238	0.504116	0.42325
	115.5	0.805122	421.657	2844.34	878.467	36.1744	0.772771	191.311	2200.71	632.252	0.235978	0.253809	0.550374	0.375038	0.506106	0.425954
	165.213	0.814639	445.538	3054.87	896.304	36.4258	0.782363	231.214	2449.77	696.231	0.180522	0.23875	0.545649	0.370209	0.485981	0.423381
	153.074	0.800207	370.57	2660.37	820.025	38.6211	0.811923	114.002	1994.98	448.534	0.201331	0.247904	0.548604	0.376593	0.500352	0.422107
	152.079	0.827446	408.189	2964.29	834.718	37.0119	0.802529	148.317	2246.97	541.485	0.186439	0.216736	0.559234	0.366749	0.49423	0.427054
	139.637	0.809548	440.32	3080.94	931.304	41.0296	0.796903	181.759	2170.8	568.195	0.225997	0.23987	0.532677	0.375723	0.511733	0.422709
	144.922	0.797132	469.029	3177.56	997.294	40.8667	0.800308	136.682	2096.87	507.191	0.222694	0.255392	0.520984	0.380587	0.507364	0.427777
	144.51	0.816301	451.222	3456.21	974.985	28.6598	0.777982	206.417	2410.42	667.658	0.173856	0.236937	0.515218	0.373425	0.482577	0.42813
	169.907	0.851105	450.557	3223.11	854.375	35.5571	0.802344	175.978	2368.71	589.905	0.173377	0.187493	0.574393	0.357187	0.491031	0.425302
	132.679	0.823518	465.733	3216.93	939.975	33.3291	0.82343	152.121	2192.22	499.404	0.204366	0.215106	0.54286	0.371372	0.513082	0.414187
	109.905	0.787366	470.197	2663.72	908.392	29.8889	0.784755	152.684	1912.18	508.07	0.216847	0.272813	0.550616	0.37906	0.520192	0.420918
	93.0308	0.798401	463.6	3096.12	963.248	28.0837	0.800417	151.877	2077.24	512.886	0.235592	0.252795	0.536114	0.377797	0.516866	0.421376
	113.953	0.805273	458.443	3076.87	944.882	35.4006	0.798875	184.682	2211.22	568.39	0.242276	0.246343	0.534949	0.377516	0.5306	0.417101
	102.365	0.788868	439.856	3177.3	983.757	29.6971	0.80822	194.845	2239.32	563.168	0.226138	0.262461	0.51247	0.384228	0.534475	0.413231
	86.788	0.804983	446.066	3101.24	929.772	25.728	0.813807	192.726	2181.93	531.256	0.230104	0.240872	0.539292	0.375559	0.546255	0.403147
	99.4224	0.822153	540.279	3597.34	1045.74	27.6398	0.813755	190.217	2177.37	541.036	0.221467	0.219817	0.538784	0.376962	0.560646	0.4095
	103.247	0.796887	471.975	3369.72	1035.29	23.9589	0.796021	203.057	1948.97	521.071	0.193359	0.257362	0.508781	0.379861	0.561341	0.401101
test_2022_05_05_14_45	272.33	0.814429	342.694	2448.88	726.009	113.83	0.694639	241.849	2595.04	949.664	0.303795	0.268794	0.571829	0.371253	0.431816	0.44448
test_2022_05_05_14_47	167.222	0.762915	328.571	2408.46	809.333	82.7479	0.731044	200.433	2362.96	766.587	0.339913	0.32652	0.518328	0.391864	0.451317	0.435522
	191.395	0.786339	302.964	2235.08	702.709	79.1939	0.727768	233.178	2376.69	799.367	0.296532	0.296835	0.559669	0.3781	0.460982	0.431485
	132.738	0.752094	304.34	2240.4	747.64	72.4615	0.730557	216.9	2188.9	735.904	0.358939	0.34167	0.511675	0.386527	0.506079	0.427446
	164.077	0.775813	333.183	2326.74	760.083	77.1209	0.735044	148.14	2094.1	658.924	0.387541	0.307258	0.536157	0.382457	0.45607	0.439051
	252.853	0.775206	317.601	2247.28	744.9	96.7426	0.709211	229.324	2325.56	816.804	0.278209	0.319914	0.53932	0.384926	0.478575	0.43316
	200.964	0.765925	329.545	2235.43	763.187	96.0453	0.726601	223.269	2421.92	812.823	0.324526	0.323398	0.53655	0.385205	0.463354	0.437013
	140.131	0.742092	295.46	2212.44	775.567	96.4141	0.776295	189.658	2124.83	610.501	0.416583	0.333466	0.502001	0.397014	0.507416	0.413249
	217.75	0.767557	331.366	2278.9	767.8	93.9052	0.703726	235.977	2448.38	876.862	0.307022	0.333503	0.537071	0.386158	0.453171	0.437238
	206.868	0.796892	293.089	2338.56	701.292	92.1987	0.734315	199.296	2479.39	798.415	0.313086	0.27755	0.550057	0.378366	0.45601	0.438898
	166.635	0.792486	317.856	2210.29	688.12	81.0882	0.713187	229.845	2472.47	857.286	0.31934	0.294144	0.570248	0.370653	0.454879	0.438392
	266.117	0.763018	363.266	2399.46	832.449	107.779	0.720087	222.793	2335.53	804.283	0.291686	0.331532	0.5136	0.390315	0.468817	0.436072
	225.047	0.831315	326.524	2159.58	625.603	72.8826	0.742427	196.324	2465.21	762.84	0.247831	0.228007	0.623426	0.351896	0.451027	0.432759
	192.92	0.801926	303.817	2217.4	668.658	85.54	0.754798	222.992	2432.26	750.144	0.30808	0.264087	0.561759	0.371288	0.463393	0.424059
	182.53	0.788938	327.73	2472.61	762.74	97.4261	0.749273	210.257	2311.65	729.325	0.354542	0.282572	0.536336	0.379871	0.482032	0.426191
	210.318	0.766962	316.704	2316.66	767.954	97.2792	0.704836	209.034	2320.01	810.474	0.319225	0.335077	0.525369	0.386147	0.46497	0.437542
	110.267	0.75479	293.362	2103.77	717.549	53.1977	0.745703	169.284	2220.08	676.737	0.33295	0.329694	0.532811	0.386495	0.482358	0.430546
	287.545	0.785219	322.319	2025.53	678.284	91.9455	0.72854	189.013	2422.07	791.036	0.242789	0.296972	0.586643	0.371336	0.457236	0.440213
	181.615	0.784948	305.788	2208.22	702.022	82.4688	0.760378	206.199	2459.19	717.87	0.311015	0.284657	0.557507	0.379891	0.477467	0.424192
	200.321	0.803632	313.632	2107.18	653.158	73.3254	0.709676	232.034	2391.94	836.999	0.275899	0.278479	0.589036	0.365196	0.462762	0.435978
	240.916	0.795104	384.603	2537.5	809.542	82.7579	0.717888	229.865	2569.01	867.044	0.258134	0.288857	0.535524	0.377437	0.431659	0.434877
	174.882	0.794218	394.493	2706.52	851.177	70.6765	0.701832	296.333	2666.03	976.733	0.292175	0.296933	0.539487	0.378435	0.442791	0.436912
	227.284	0.785431	304.17	2143.32	690.406	68.3979	0.744117	210.723	2344.04	738.281	0.237809	0.29009	0.55503	0.377087	0.474801	0.42916
	129.687	0.785781	278.948	2065.46	638.376	60.0896	0.797063	159.125	2623.93	646.688	0.350518	0.269346	0.565293	0.374145	0.428562	0.421368
	182.416	0.77922	332.381	2218.28	735.351	73.6357	0.738564	211.358	2601.74	821.754	0.288694	0.30101	0.558723	0.377436	0.446935	0.433756
	205.643	0.819516	315.714	2232.87	655.149	74.1847	0.72098	232.579	2678.88	901.087	0.269058	0.253251	0.59359	0.360685	0.425049	0.440601
	228.003	0.809303	336.905	2297.02	696.886	76.5438	0.739018	210.578	2452.3	775.742	0.257217	0.2598	0.583825	0.365753	0.455332	0.430706
	135.658	0.803661	266.847	1924.26	582.892	54.5417	0.765837	199.232	2359.47	681.731	0.287318	0.257585	0.600212	0.361207	0.47417	0.417137
	228.435	0.788534	324.109	2225.69	715.002	69.1399	0.719906	237.41	2502.42	847.315	0.240209	0.295777	0.553802	0.377001	0.454858	0.435529
	185.725	0.794061	310.261	2191.27	687.356	69.36	0.735825	238.499	2614.52	854.746	0.283785	0.280383	0.573034	0.37206	0.432432	0.435419
	84.0145	0.745045	341.389	2313.74	810.699	55.5091	0.778496	155.638	2397.46	631.576	0.508072	0.329761	0.498457	0.395419	0.442257	0.428268
	88.3563	0.773849	303.376	2233.53	691.404	46.2281	0.790367	169.093	2323.3	602.11	0.395899	0.28803	0.534379	0.377634	0.484204	0.415687
	157.442	0.785076	328.183	2332.15	740.879	60.2788	0.745165	156.588	2248.42	657.683	0.291014	0.294025	0.546273	0.380214	0.464733	0.43159
	199	0.785412	325.297	2234.92	721.89	81.9036	0.733069	214.083	2360.34	776.991	0.289708	0.294248	0.564002	0.376383	0.458362	0.436298
	208.169	0.805516	328.456	2382.13	717.706	69.1216	0.754859	215.497	2476.37	754.494	0.25079	0.260764	0.562136	0.372928	0.465882	0.424767
	192.705	0.78825	315.641	2393.72	745.17	70.6136	0.763406	228.97	2774.75	818.76	0.289054	0.279112	0.527306	0.382925	0.448058	0.424322
	242.145	0.778269	349.858	2286.82	771.043	82.9227	0.726938	217.739	2216.26	743.384	0.259378	0.30632	0.546487	0.383293	0.492267	0.428997
	203.659	0.757654	306.428	2215	751.607	84.6973	0.759951	187.955	2447.67	718.993	0.32775	0.318835	0.523129	0.38995	0.454835	0.430053
	116.132	0.770716	258.157	2063.14	653.222	57.224	0.779862	175.876	2295.31	630.917	0.376116	0.297089	0.536166	0.385333	0.48019	0.423847
	170.564	0.770377	360.873	2534.02	852.455	80.1378	0.719382	221.232	2429.62	830.392	0.3321	0.321807	0.512431	0.388644	0.45048	0.435486
	190.305	0.777569	344.142	2428.18	793.312	60.0235	0.737226	200	2525.29	785.231	0.24681	0.304441	0.537173	0.382696	0.444918	0.433212
	218.675	0.777929	344.661	2275.75	764.979	72.0964	0.735422	195.695	2243.46	722.439	0.253425	0.303975	0.554399	0.382705	0.473599	0.43261
	153.169	0.822731	295.153	2042.3	588.71	44.3117	0.769695	142.311	2446.49	642.321	0.225043	0.232591	0.617979	0.351448	0.461581	0.428218
	194.869	0.782023	287.247	1971.67	639.039	69.2276	0.752771	199.26	2130.37	657.878	0.25658	0.29026	0.587591	0.368356	0.507817	0.420784
	127.75	0.806477	288.941	2086.12	615.133	49.8714	0.782327	200.128	2233.54	629.034	0.284451	0.248335	0.584899	0.361853	0.522133	0.410908
	249.107	0.774733	344.004	2362.45	791.249	85.4196	0.730383	215.748	2307.75	767.956	0.267631	0.310878	0.524212	0.387259	0.471683	0.433429
	184.911	0.784508	325.917	2270.23	734.371	59.5548	0.774128	205.454	2415.52	686.171	0.244874	0.278917	0.548578	0.379453	0.484958	0.417267
	226.511	0.783313	301.411	2238.15	714.558	65.9773	0.738456	212.711	2472.38	795.886	0.22779	0.29538	0.550033	0.381001	0.464827	0.433515
	188.396	0.795268	320.803	2248.54	705.537	63.4295	0.691087	275.045	2394.65	911.344	0.254553	0.300149	0.562113	0.373993	0.452909	0.438262
	263.568	0.794102	335.305	2356.76	743.278	77.3514	0.725431	207.459	2340.53	770.772	0.232476	0.285607	0.555373	0.379	0.463371	0.432865
	205.193	0.785386	344.346	2454.52	784.624	75.0588	0.750338	227.399	2418.97	765.814	0.272629	0.287285	0.530202	0.382051	0.469789	0.425511
	135.433	0.783273	307.907	2291.66	719.392	56.8372	0.771551	187.315	2173.8	625.726	0.29425	0.282779	0.539228	0.378038	0.508259	0.416769
	180.704	0.779519	329.325	2230.22	739.747	62.3668	0.765585	180.091	2363.38	687.138	0.263842	0.289531	0.552961	0.381429	0.470899	0.427407
	215.72	0.782158	343.598	2428.89	788.647	62.08	0.743304	214.941	2552.83	804.552	0.22738	0.295557	0.536942	0.383218	0.448945	0.432873
	223.361	0.792883	302.77	2099.81	666.388	63.1967	0.731973	216.569	2262.05	747.232	0.218731	0.283734	0.579723	0.37073	0.498362	0.431438
	207.399	0.796856	322.298	2392.29	735.236	62.6763	0.739923	238.634	2593.45	828.728	0.229435	0.276459	0.550964	0.376216	0.472933	0.426912
	229.185	0.764121	349.481	2285.77	797.122	74.7661	0.759341	219.938	2567.36	763.569	0.246186	0.311233	0.546006	0.387271	0.465756	0.423684
	209.631	0.798915	342.695	2307.69	729.858	65.6486	0.764985	218.436	2473.73	731.999	0.23796	0.263956	0.564571	0.373312	0.48562	0.420405
	212.759	0.778554	330.052	2533.13	810.791	63.4753	0.751137	228.428	2448.49	772.118	0.236726	0.295897	0.509033	0.388753	0.483259	0.427381
	155.5	0.78232	329.359	2270.58	741.156	46.6842	0.774027	191.228	2449.41	681.365	0.238125	0.283176	0.552003	0.378457	0.472959	0.417217
	261.654	0.782341	338.491	2278.82	756.353	95.5276	0.721852	239.329	2348.06	816.725	0.268972	0.304032	0.548916	0.383712	0.476398	0.431767
	88.9061	0.76961	286.447	2299.55	720.929	38.697	0.799305	170.604	2360.4	581.551	0.36284	0.290012	0.528716	0.381539	0.514677	0.4108
	204.325	0.79167	307.991	2323.3	717.163	66.8675	0.734712	201.891	2299.71	719.74	0.259446	0.286152	0.545539	0.380361	0.480671	0.424833
	162.233	0.792824	359.548	2591.33	805.768	53.1027	0.744662	172.142	2163.12	666.738	0.255315	0.280888	0.528845	0.379503	0.486884	0.431631
	156.427	0.751064	304.644	2272.27	777.614	48.4274	0.781131	191.214	2485.01	683.162	0.26208	0.319439	0.516563	0.393345	0.481268	0.419991
	148.773	0.818959	318.562	2597.04	710.783	53.303	0.769295	151.556	1910.1	527.577	0.264032	0.236858	0.533342	0.369906	0.537693	0.408882
	223.84	0.809711	325.01	2298.43	689.407	61.2928	0.742894	212.675	2387.64	751.867	0.222071	0.257168	0.566791	0.367522	0.473831	0.429025
	158.399	0.772768	329.362	2313.23	767.324	53.4167	0.779261	163.234	2356.7	624.378	0.26036	0.292893	0.537732	0.385854	0.474146	0.422996
	237.636	0.807692	350.069	2337.41	718.541	55.8256	0.757528	188.712	2336.1	697.638	0.202365	0.254992	0.571683	0.367399	0.47733	0.427452
	184.388	0.790304	352.827	2576.99	802.509	58.2449	0.764665	191.846	2336.13	669.656	0.247923	0.276535	0.520897	0.379971	0.479297	0.421403
	226.213	0.804617	322.356	2260.04	688.962	51.5671	0.750276	224.466	2381.21	746.036	0.186587	0.261562	0.57583	0.369534	0.480715	0.426092
	124.27	0.772983	357.901	2629.78	844.722	50.7619	0.800348	167.275	2231.76	563.124	0.306732	0.285209	0.503173	0.388132	0.514719	0.410587
	206.193	0.80331	327.801	2213.74	690.32	54.2944	0.763694	178.777	2377.91	677.094	0.215975	0.259855	0.586667	0.369097	0.480241	0.424554
	160.794	0.79415	307.119	2148.06	674.749	65.7794	0.762401	193.255	2000.5	614.72	0.279812	0.270187	0.577495	0.372497	0.544754	0.414559
	255.857	0.794091	355.774	2417.56	770.352	68.4346	0.748534	223.134	2652.85	778.984	0.214425	0.276422	0.552872	0.377592	0.468536	0.42756
	209.529	0.78673	328.531	2434.66	767.554	70.1667	0.738959	219.662	2463.58	787.544	0.252334	0.292207	0.533494	0.383645	0.448052	0.429686
	235.24	0.800361	342.525	2259.2	719.702	50.3333	0.760092	208.436	2493.45	728.637	0.177137	0.264542	0.581199	0.372458	0.480786	0.422772
	185.144	0.79943	339.997	2409.38	741.176	50.8556	0.792371	160.771	2376.23	603.853	0.219023	0.255043	0.561781	0.371021	0.480223	0.420627
	153.418	0.793115	319.154	2167.87	690.454	52.5026	0.79163	214.122	2322.81	637.487	0.255831	0.262979	0.571808	0.371998	0.538897	0.409708
	211.206	0.775478	344.766	2448.85	805.909	55.6839	0.73972	209.774	2320.54	738.963	0.211536	0.305358	0.533143	0.385405	0.468714	0.428806
	75.3226	0.756307	308.601	2658.49	849.497	34.2796	0.806502	215.024	2242.4	587.993	0.329033	0.303405	0.48602	0.396945	0.560806	0.397854
	91.2337	0.79893	318.732	2397.49	703.509	32.8161	0.7745	198.687	2248.29	618.589	0.267733	0.263571	0.557698	0.367719	0.53276	0.408921
	77.3793	0.735517	354.3	2709.94	929.48	29.8966	0.782701	205.48	2069.28	566.442	0.279945	0.339683	0.478768	0.399097	0.569168	0.394954
	182.68	0.781171	323.972	2365.64	755.335	55.785	0.760163	190.508	2380.17	693.638	0.247377	0.290608	0.526898	0.381652	0.481823	0.42572
	111.936	0.779744	360.914	2512.17	812.943	35.9929	0.798475	180.586	2199.23	569.377	0.249079	0.276916	0.529202	0.384118	0.537438	0.404564
	210.494	0.800074	367.431	2480.79	781.279	42.966	0.778388	213.401	2639.77	726.618	0.173117	0.257933	0.562556	0.375098	0.484291	0.422128
	156.344	0.782962	354.813	2332.77	768.858	33.996	0.795926	177.152	2468.16	622.97	0.185071	0.27403	0.568617	0.375849	0.49528	0.41705
	192.899	0.743233	349.658	2672.06	928.378	90.9686	0.766268	212.093	2467.03	723.905	0.328973	0.337211	0.472569	0.401396	0.473374	0.422197
	202.975	0.799913	352.348	2459.42	761.905	48.075	0.768425	220.005	2662.76	755.629	0.192982	0.262178	0.56809	0.376548	0.47137	0.4192
	92.203	0.774513	342.17	2419.2	779.678	33.2857	0.796396	189.486	2260.76	584.2	0.274452	0.286431	0.54125	0.379385	0.530628	0.407485
	179.943	0.792121	346.47	2452.99	771.266	43.4788	0.784982	206.516	2501.37	672.373	0.200242	0.266349	0.549796	0.377438	0.481345	0.416209
	111.703	0.748407	353.232	2434.57	844.909	32.1081	0.79961	185.11	2540.02	638.347	0.224656	0.316846	0.518497	0.391778	0.517291	0.413223
	102.128	0.780692	358.933	2696.4	845.979	35.1453	0.78086	165.406	2123.83	562.012	0.273091	0.284824	0.513544	0.386107	0.52645	0.411043
	171.15	0.736512	374.59	2841.67	1011.92	61.1278	0.779994	223.644	2476.48	703.686	0.265617	0.339522	0.468625	0.39999	0.47472	0.419773
	160.862	0.796638	354.099	2397.51	749.138	35.5597	0.766722	227.481	2607.41	742.64	0.182499	0.266856	0.577794	0.37169	0.479285	0.41226
	139.395	0.769338	367.79	2414.33	809.711	44.1019	0.770312	231.782	2257.77	666.812	0.236997	0.301573	0.54416	0.380341	0.534323	0.413767
	154.153	0.788413	379.57	2658.26	854.11	45.4762	0.76292	170.08	2211.37	629.753	0.22652	0.279109	0.533617	0.380233	0.495279	0.42192
	152.819	0.776381	386.235	2534.89	835.128	43.3681	0.804574	185.892	2388.23	600.543	0.223984	0.278794	0.54452	0.380504	0.504986	0.411644
	101.58	0.762322	295.827	2274.04	736.713	35.6609	0.787542	215.679	2289.58	633.612	0.264101	0.306281	0.540079	0.384728	0.536312	0.406027
	149.171	0.775629	339.804	2422.76	791.387	34.3143	0.796662	205.165	2469.36	632.672	0.213157	0.284041	0.541142	0.385765	0.487603	0.409588
	145.566	0.793872	377.891	2550.43	802.625	34.7857	0.782421	198.208	2548.36	686.833	0.201896	0.264017	0.549466	0.374717	0.478623	0.421602
	115.535	0.811499	383.462	2647.87	785.765	41.4186	0.77602	206.839	2165.17	611.93	0.262035	0.247071	0.572129	0.368372	0.537524	0.407274
	191.338	0.783525	350.193	2454.93	788.712	41.1055	0.789744	189.231	2526.25	661.145	0.183399	0.274926	0.548178	0.380813	0.478971	0.41573
	144.574	0.779631	351.009	2451.73	794.49	36.8085	0.817967	179.996	2343.32	556.42	0.205414	0.270876	0.542943	0.381172	0.523617	0.401543
	157.778	0.813816	377.945	2467.42	743.171	34.0222	0.796688	220.626	2562.48	666.63	0.178162	0.234522	0.581512	0.364695	0.469225	0.406541
	180.706	0.814604	381.242	2865.41	825.595	40.6275	0.753721	197.118	2262.84	664.427	0.186538	0.248896	0.542013	0.370495	0.496424	0.414336
	161.45	0.792238	392.435	2471.02	801.313	42.25	0.752119	244.174	2251.13	714.744	0.206451	0.278232	0.553024	0.37651	0.533862	0.413856
	148.665	0.795199	344.002	2473.91	765.772	44.9756	0.779488	224.388	2239.81	642.507	0.22951	0.264571	0.55517	0.375296	0.532762	0.409281
	137.654	0.78708	365.353	2306.3	763.944	31.4669	0.800212	165.926	2397.51	596.946	0.18893	0.268123	0.570208	0.375387	0.500241	0.417902
	172.895	0.802335	388.647	2620.37	809.219	37.0197	0.795459	185.704	2368.51	619.327	0.184364	0.24929	0.569979	0.372617	0.504407	0.415117
	166.114	0.78437	398.99	2703.9	878.183	38.1377	0.793172	207.574	2443.02	639.269	0.188581	0.273829	0.535984	0.383132	0.513864	0.405524
	147.376	0.799655	411.148	2495.82	802.778	32.9045	0.77823	197.979	2391.28	651.133	0.187267	0.261072	0.580222	0.372177	0.515037	0.411421
	130.971	0.782558	414.996	2648.6	874.066	33.0422	0.792778	205.592	2328.7	605.9	0.201628	0.277098	0.543091	0.381947	0.521789	0.403175
	111.776	0.794319	402.583	2627.58	849.265	32.4037	0.79684	202.092	2204.02	578.539	0.22637	0.261216	0.535372	0.380368	0.550476	0.400557
	122.753	0.789687	435.185	2813.65	906.687	31.4141	0.812963	199.248	2461.19	592.545	0.199712	0.26057	0.535395	0.382604	0.521499	0.398249
	150.134	0.78695	420.934	2868.46	926.656	44.2931	0.792938	217.568	2346.07	628.171	0.221124	0.27076	0.520384	0.38284	0.524434	0.403493
	158.276	0.793274	382.258	2661.81	840.257	41.2344	0.780766	170.891	2071.05	556.315	0.205935	0.267559	0.539101	0.378764	0.542248	0.406847
	126.824	0.733104	382.623	2453.78	910.079	58.6667	0.77425	258.788	2387.5	704.204	0.312288	0.352567	0.511571	0.399262	0.533537	0.403474
	139.639	0.789266	386.084	2542.47	820.236	30.6885	0.800661	159.484	2416.37	598.44	0.183221	0.264534	0.561521	0.377371	0.48682	0.416509
	130.729	0.805156	419.516	3034.66	902.125	33.2458	0.781477	183.153	2261.08	610.125	0.207887	0.250919	0.528416	0.373748	0.534835	0.413778
	60.178	0.771185	377.462	2966.39	913.415	25.2288	0.794896	222.909	2782.56	680.933	0.352958	0.296026	0.493123	0.387882	0.475181	0.417982
	99.8304	0.787738	368.092	2601.63	828.968	25.75	0.792083	222.151	2573.15	677.354	0.207742	0.270831	0.550574	0.382306	0.497432	0.410732
	116.107	0.815658	416.669	2928.77	849.937	28.3221	0.795785	163.252	2179.79	555.556	0.200625	0.232562	0.553255	0.370187	0.520702	0.408294
	169.494	0.818509	383.954	2508.7	743.668	30.1558	0.756829	230.686	2159.71	654.933	0.151065	0.243838	0.578917	0.362046	0.530879	0.415185
	120.681	0.787077	409.786	2669.87	854.671	26.5462	0.789234	209.267	2572.03	677.916	0.188238	0.27013	0.546523	0.37743	0.485465	0.4136
	119.029	0.78347	397.132	2824.85	898.967	35.7348	0.790533	239.092	2495.19	668.556	0.253107	0.275276	0.519696	0.384458	0.524678	0.402837
	118.565	0.776541	426.007	3155.24	1007.45	37.1522	0.780321	259.67	2490.81	686.995	0.236941	0.29017	0.473066	0.385409	0.519887	0.398388
	128.322	0.796773	372.064	2571.78	806.852	29.5973	0.789362	201.493	2498.48	651.562	0.195847	0.262837	0.545239	0.376293	0.505771	0.40915
	123.656	0.798001	438.293	2940.73	932.134	29.5738	0.791809	236.226	2449.57	653.583	0.195286	0.25873	0.53823	0.380861	0.510937	0.400158
	88.3675	0.788299	405.6	2742.08	884.564	22.0684	0.79963	152.794	2270.03	540.547	0.204155	0.267716	0.53717	0.384694	0.508176	0.409997
	151.734	0.770911	408.675	2687.07	913.227	25.7396	0.804695	199.294	2580.76	633.461	0.149142	0.28693	0.520334	0.388926	0.497616	0.40686
	121.688	0.79794	411.224	2905.52	899.786	25.8625	0.787047	186.959	2345.87	607.38	0.1975	0.26322	0.52848	0.379815	0.507525	0.413496
	97.0462	0.807859	417.109	2701.49	832.341	21.0252	0.794933	231.539	2643.52	668.426	0.205878	0.245072	0.573237	0.371646	0.504326	0.406271
	113.707	0.824837	438.064	2922.71	856.001	22.7692	0.779325	214.255	2596.04	696.878	0.17286	0.227472	0.566427	0.368207	0.491795	0.413984
	91.477	0.797476	432.734	2889.78	894.151	27.9038	0.760433	252.379	2137.33	644.066	0.234319	0.273463	0.54422	0.37555	0.549346	0.410052
	139.314	0.812051	437.937	3038.92	909.629	37.7843	0.801479	283.146	2681.49	737.697	0.218776	0.234924	0.533943	0.371767	0.525074	0.402325
	136.923	0.829253	404.502	2862.62	807.598	23.6077	0.797837	241.656	2669.02	677.645	0.149124	0.217646	0.575953	0.36289	0.526805	0.398806
	115.571	0.802065	403.122	2744.64	846.516	27.9558	0.791459	204.014	2305.57	614.241	0.199588	0.252122	0.538792	0.376822	0.525783	0.408018
	95.6323	0.826159	458.216	3067.99	884.394	23.3484	0.791415	234.826	2526.37	669.597	0.197943	0.224419	0.564317	0.369711	0.538566	0.401243
	132.603	0.776769	372.749	2538.79	844.384	28.3235	0.799468	177.615	2201.36	555.974	0.176509	0.282567	0.534673	0.383457	0.527109	0.407325
	89.5567	0.79978	416.789	2958.03	897.862	22.8041	0.819235	184.479	2704.44	615.104	0.219806	0.245496	0.523257	0.381208	0.490836	0.401556
	123.996	0.787263	390.002	2879.41	894.033	22.5179	0.800412	168.054	2250.07	564.112	0.161282	0.269297	0.524314	0.382321	0.522469	0.411043
	96.6889	0.786634	431.641	3213.54	1000.62	21.7444	0.764562	209.149	1939.69	567.908	0.191253	0.281937	0.494801	0.386671	0.566582	0.389466
	122.369	0.799937	403.248	2587.68	824.539	28.1446	0.786854	239.554	2358.26	646.673	0.186273	0.25613	0.571863	0.370356	0.545857	0.40193
	105.937	0.803298	412.17	2914.52	881.23	25.5854	0.786644	224.664	2556.76	671.858	0.215409	0.252754	0.535687	0.376094	0.515555	0.405088
	93.5918	0.800425	450.286	3097	930.641	21.5561	0.795573	199.469	2445.88	619.519	0.191698	0.255066	0.535842	0.374697	0.524899	0.41082
	91.4267	0.789595	439.731	3039.58	936.258	24.9733	0.834671	212.883	2681.27	592.92	0.219448	0.254546	0.528204	0.379879	0.541255	0.386441
	70.4023	0.782984	446.164	3157.18	981.382	28.1839	0.767976	218.858	2040.14	595.495	0.315965	0.289199	0.505834	0.383909	0.544879	0.402294
	103.848	0.802936	489.79	3189.34	984.617	28.4621	0.791265	201.819	2269.27	604.566	0.21813	0.25123	0.528668	0.380417	0.548463	0.405372
	95.6667	0.804417	436.909	2996.87	906.711	26.6562	0.775747	268.152	2705.73	728.497	0.210677	0.255582	0.536916	0.37536	0.545236	0.402326
	74.0196	0.801559	512.298	3719.03	1066.83	16.1373	0.766177	229.48	2395.59	684.002	0.181033	0.263459	0.505767	0.376578	0.499071	0.417484
test_2022_05_05_14_52	206.518	0.828961	312.281	2357.24	654.098	68.3523	0.769064	133.069	2040.77	565.481	0.249524	0.223554	0.587498	0.361387	0.45207	0.456177
test_2022_05_05_14_54	215.583	0.809722	321.46	2465.93	714.182	79.0286	0.74847	159.444	2305.48	689.332	0.27284	0.254309	0.565209	0.37034	0.436496	0.461789
	248.55	0.79216	326.087	2541.67	779.205	105.302	0.776489	149.611	2170.07	593.176	0.308037	0.268399	0.520409	0.384814	0.463726	0.452362
	187.492	0.795939	327.581	2508.33	762.409	72.0339	0.772835	144.629	2227.54	611.358	0.28588	0.264875	0.535902	0.380845	0.444148	0.454883
	237.162	0.821773	316.871	2461.18	690.768	68.3117	0.75194	154.176	2165.3	634.833	0.232321	0.238344	0.561502	0.368771	0.456913	0.453984
	221.658	0.808246	288.542	2192.68	641.599	76.6335	0.735391	144.745	2268.11	692.6	0.267268	0.261954	0.569914	0.368796	0.432752	0.46486
	190.812	0.756552	271.084	2157.88	722.616	88.0972	0.760522	131.91	2164.94	609.734	0.328879	0.321983	0.510944	0.394711	0.443067	0.457631
	198.403	0.810284	269.99	2034.8	593.129	54.2581	0.77085	118.072	2185.46	576.81	0.223791	0.247922	0.603037	0.359571	0.448439	0.457649
	238.25	0.789324	293.793	2128.26	670.163	82.1463	0.784922	162.236	2306.83	614.388	0.259847	0.269458	0.558441	0.375635	0.455647	0.446824
	245.439	0.806905	292.448	2258.18	653.417	83.0556	0.774465	157.93	2247.31	618.3	0.260135	0.250841	0.562173	0.366778	0.460518	0.454062
	204.509	0.810926	281.638	2125.52	620.038	74.518	0.766983	171.954	2248	644.006	0.272813	0.248481	0.57006	0.366257	0.452401	0.450953
	209.678	0.793392	308.808	2230.14	698.987	57.8913	0.78995	144.82	2190.95	556.147	0.221491	0.263543	0.556466	0.376886	0.452849	0.446356
	185.303	0.82105	350.972	2493.54	723.479	75.7431	0.738383	151.92	2312.61	699.568	0.294706	0.245505	0.573554	0.366469	0.412593	0.465459
	321.391	0.74793	314.866	2411.62	828.771	116.057	0.786532	130.369	2191.2	571.549	0.270845	0.321357	0.499524	0.400218	0.438317	0.452039
	256.398	0.785265	309.408	2219.44	717.091	81.0526	0.729881	174.108	2249.15	719.39	0.246367	0.296422	0.561235	0.379138	0.428845	0.459259
	193.211	0.792271	330.099	2414.07	761.887	76.9248	0.747243	180.494	2412.99	735.757	0.293459	0.279166	0.549857	0.382153	0.418817	0.461976
	250.817	0.753939	309.803	2391.13	814.155	102.178	0.772777	154.934	2147.83	601.806	0.294129	0.319515	0.505313	0.39809	0.462328	0.451675
	194.253	0.794013	311.609	2391.9	734.696	74.7952	0.768303	136.409	2131.81	589.98	0.286248	0.27061	0.535594	0.382918	0.463969	0.457248
	231.498	0.782581	314.004	2328.31	745.68	80.0226	0.767573	155.75	2377.69	662.027	0.260225	0.284159	0.542684	0.384884	0.428759	0.453912
	229.449	0.769107	323.392	2497.35	817.33	96.8406	0.773933	138.091	2160.03	584.044	0.298047	0.299787	0.506187	0.393948	0.451167	0.455195
	254.435	0.810514	325.664	2334.09	699.486	88.3043	0.771023	141.909	2061.04	570.529	0.262165	0.247985	0.573066	0.370289	0.44952	0.454829
	165.557	0.800877	341.788	2277.4	717.732	50.2278	0.788041	164.137	2209.44	578.056	0.236663	0.254324	0.562516	0.372284	0.476514	0.44075
	204.288	0.782731	308.554	2477.89	773.782	74.032	0.784303	166.301	2355.96	629.473	0.276137	0.278405	0.508645	0.38915	0.448952	0.449513
	179.223	0.789708	351.417	2481	793.052	46.266	0.805787	118.195	2037.44	481.155	0.21212	0.262071	0.54195	0.382511	0.489706	0.448607
	222.112	0.800471	308.461	2323.83	700.4	72.6853	0.757724	156.193	2277.7	659.383	0.251069	0.26495	0.557259	0.37478	0.439722	0.460549
	151.12	0.778758	274.124	2308.03	710.969	57.7656	0.807109	102.685	2024.41	465.739	0.350575	0.276305	0.518126	0.3908	0.438283	0.450083
	261.449	0.800738	326.775	2396.18	732.548	85.0642	0.7607	141.633	2161.08	615.459	0.24528	0.262924	0.547822	0.377201	0.446753	0.456825
	191.596	0.767351	336.721	2574.11	851.901	67.5071	0.780699	121.743	2231.24	570.747	0.27956	0.300305	0.49923	0.394386	0.43638	0.455584
	184.669	0.771699	362.155	2598.54	855.049	55.7625	0.77367	136.96	2262.47	605.243	0.237272	0.297955	0.518234	0.389398	0.43744	0.459164
	256.562	0.812572	297.475	1990.26	613.905	65.3625	0.780659	156.789	2272.68	602.17	0.205969	0.241571	0.604781	0.361265	0.448816	0.447599
	206.33	0.784942	333.82	2496.24	790.345	81.3464	0.779125	151.582	2233.25	602.551	0.292529	0.276525	0.522002	0.386638	0.440117	0.451253
	274.433	0.792881	323.828	2457.19	760.325	85.9142	0.767802	159.286	2320.29	647.43	0.240336	0.271294	0.532412	0.382952	0.444481	0.453735
	261.833	0.806915	302.177	2194.96	661.121	72.9691	0.772738	152.741	2341.24	635.552	0.228564	0.251198	0.567471	0.370434	0.435566	0.457032
	236.563	0.791092	304.32	2235.21	697.785	57.1574	0.777642	153.029	2307.74	616.392	0.2063	0.269961	0.564122	0.377019	0.420074	0.449122
	221.178	0.793306	315.937	2421.59	740.371	58.5345	0.794591	132.625	2281.37	557.002	0.216686	0.262198	0.547608	0.380505	0.455098	0.450115
	202.449	0.790827	316.94	2510.06	768.945	72.8352	0.813369	120.637	2402.19	547.407	0.275922	0.258317	0.516567	0.38546	0.43461	0.448755
	243.708	0.801435	306.85	2341.31	702.546	69.2798	0.784803	154.56	2339.2	610.675	0.229342	0.252546	0.557571	0.376218	0.437154	0.446615
	194.013	0.804213	334.587	2456.28	741.763	58.0804	0.769311	155.206	2057.72	583.028	0.233325	0.256132	0.550834	0.376529	0.468875	0.445743
	202.504	0.812797	303.391	2209.23	651.536	55.7395	0.803823	148.578	2194.26	532.296	0.22205	0.234828	0.581548	0.364888	0.472239	0.440082
	226.363	0.788011	332.586	2548.5	790.692	63.8767	0.770408	175.934	2190.11	628.45	0.225584	0.275966	0.521314	0.383746	0.453842	0.453027
	200.278	0.7983	314.123	2460.41	737.549	52.2632	0.77411	155.332	2164.7	596.372	0.215369	0.262055	0.548816	0.377475	0.469108	0.447637
	217.814	0.808113	336.989	2419.89	727.329	53.8277	0.799171	136.991	2061.68	513.164	0.200659	0.241901	0.564193	0.371437	0.490001	0.442473
	247.472	0.804282	309.102	2225.44	678.677	74.7329	0.795298	133.668	2122.23	539.886	0.233772	0.247182	0.566153	0.371218	0.478071	0.449667
	215.031	0.800235	316.336	2383	724.21	60.6406	0.782623	130.326	1965.28	517.292	0.228568	0.256454	0.549867	0.377186	0.466302	0.446563
	188.433	0.800707	304.147	2336.21	700.88	59.1042	0.805084	107.312	2186.22	503.606	0.247938	0.248692	0.564187	0.374787	0.461853	0.455263
	261.684	0.795528	329.637	2391.92	745.185	70.3822	0.794532	131.881	2187.51	545.973	0.226684	0.258251	0.543268	0.380615	0.463216	0.450438
	288.724	0.786656	330.285	2393.29	765.299	56.6285	0.790393	130.699	2107.74	533.486	0.173978	0.270966	0.537474	0.381839	0.470632	0.449511
	216.446	0.802728	320.375	2429.07	729.732	48.7065	0.789476	147.624	2022.82	527.902	0.186908	0.250955	0.554756	0.376651	0.49427	0.439297
	213.357	0.828446	332.267	2467.82	686.645	47.2946	0.80248	148.311	2300.92	553.053	0.188047	0.214057	0.584565	0.360781	0.462524	0.44037
	250.68	0.795324	364.834	2506.91	794.23	45.928	0.813964	160.349	2318.48	553.034	0.155796	0.25143	0.549783	0.379826	0.490667	0.435943
	197.172	0.794752	356.196	2536.28	793.943	57.6765	0.79484	138.336	2089.73	523.555	0.233336	0.259207	0.527015	0.382282	0.472449	0.44578
	194.844	0.798144	356.677	2625.74	806.851	42.3533	0.808187	140.393	2031.1	484.807	0.181044	0.251619	0.531847	0.379771	0.486126	0.437687
	130.043	0.814708	301.802	2343.95	666.112	34.1183	0.82668	109.398	2158.42	452.868	0.221371	0.224764	0.567284	0.367179	0.453741	0.442563
	184.315	0.797227	307.246	2252.89	694.293	52.5714	0.796854	155.875	2108.61	539.362	0.225275	0.256052	0.568295	0.375937	0.490339	0.438173
	229.372	0.799298	324.424	2479.89	752.469	53.0233	0.802759	128.55	2116.86	504.176	0.199701	0.250815	0.543868	0.378155	0.447576	0.444184
	162.494	0.786962	317.436	2321.73	731.457	47.2848	0.826297	116.802	2022.35	444.876	0.231741	0.25859	0.538043	0.380033	0.48961	0.442921
	151.299	0.822745	328.731	2474.79	699.014	30.8503	0.832922	135.964	2383.99	477.373	0.178457	0.214669	0.575373	0.362804	0.478122	0.427096
	244.227	0.833154	320.73	2357.77	652.984	41.7216	0.8371	109.454	2233.34	444.945	0.149796	0.199775	0.600412	0.358897	0.467082	0.440004
	246.084	0.80145	342.906	2444.22	751.86	62.4545	0.785311	142.171	2063.28	539.364	0.211083	0.253513	0.557038	0.377389	0.457843	0.44395
	202.55	0.781543	340.378	2457.64	792.318	47.1065	0.797435	129.906	2113.12	516.398	0.202545	0.275734	0.526142	0.38456	0.467437	0.446584
	214.674	0.818105	333.295	2461.51	714.711	51.6894	0.773827	160.866	2138.71	594.157	0.199397	0.237261	0.563211	0.368364	0.480962	0.454467
	139.438	0.779745	312.866	2628.44	806.169	32.4719	0.845296	95.3785	2117.61	400.319	0.204402	0.262869	0.511638	0.3891	0.450281	0.439719
	137.029	0.802102	333.658	2490.96	745.685	30.6985	0.834882	123.114	2391.55	480.639	0.197655	0.237778	0.545596	0.375093	0.437135	0.440658
	179.602	0.795702	344.329	2536.04	780.352	49.852	0.789719	169.748	2076.79	545.443	0.226805	0.259558	0.546292	0.380637	0.488409	0.43708
	212.218	0.784294	329.641	2335.35	754.306	51.838	0.766878	160.598	1919.78	553.263	0.208129	0.284822	0.550038	0.38211	0.498779	0.44311
	204.149	0.787164	341.138	2571.47	804.556	42.6157	0.803516	137.749	2192.16	529.848	0.182807	0.264646	0.524152	0.384602	0.457685	0.443868
	241.134	0.798768	325.131	2465.92	748.426	48.1841	0.80208	135.832	2150.07	517.474	0.174677	0.251544	0.541364	0.376939	0.46294	0.441716
	203.229	0.767136	356.849	2648.47	884.423	41.7917	0.801283	162.703	2143.03	526.993	0.182263	0.29378	0.501478	0.394714	0.49041	0.432588
	193.532	0.791515	377.422	2543.56	819.273	48.8557	0.815469	138.341	2081.53	483.356	0.208971	0.255671	0.54387	0.382114	0.494722	0.436325
	158.866	0.80937	347.817	2546.75	763.064	28.4229	0.796357	151.204	1983.37	506.19	0.154489	0.24297	0.550754	0.370163	0.486733	0.438647
	162.794	0.760944	369.427	2709.64	915.202	26.0469	0.805727	129.973	2065.12	483.968	0.149656	0.299966	0.50569	0.394761	0.480183	0.441373
	159.127	0.84016	350.009	2672.32	707.365	38.5545	0.822913	122.311	2368.85	504.472	0.1927	0.195895	0.58623	0.356821	0.489366	0.446923
	158.389	0.821407	350.139	2562.06	736.118	37.5903	0.793175	164.891	2141.28	560.135	0.195694	0.225253	0.566999	0.366739	0.493354	0.439642
	155.28	0.765887	359.114	2587.69	874.544	29.5681	0.822304	149.344	2301.94	505.324	0.165837	0.286423	0.514849	0.391934	0.471732	0.440921
	200.78	0.802573	377.685	2679.76	826.901	42.2473	0.824054	131.967	2190.78	478.771	0.185438	0.240416	0.54112	0.37976	0.484092	0.431063
	127.226	0.80457	373.323	2747.46	822.311	25.4513	0.817907	173.139	2311.44	538.658	0.172506	0.241093	0.536434	0.376717	0.492158	0.430491
	116	0.773574	380.414	2950.25	941.387	31.3086	0.843007	154.887	2374.67	478.349	0.218832	0.269192	0.492146	0.390181	0.512321	0.41794
	99.0966	0.784042	419.669	3198.6	999.689	20.8744	0.805031	176.264	2185.48	521.642	0.180431	0.272916	0.491993	0.387364	0.493089	0.427729
	147.088	0.828774	385.252	2851.36	797.211	34.1244	0.823551	189.468	2435.47	569.7	0.186048	0.208549	0.562864	0.367622	0.524262	0.423054
	106.591	0.815851	402.774	2828.81	829.172	23.4309	0.831655	116.01	2046.59	419.24	0.187584	0.221638	0.553647	0.371144	0.535834	0.429743
	105.211	0.809919	421.7	2942.74	878.208	20.4097	0.820467	143.513	2037.29	449.001	0.167154	0.233565	0.5413	0.376863	0.520257	0.424116
test_2022_05_05_14_56	133.922	0.810387	305.256	2359.76	676.456	60.5434	0.736426	165.821	2212.84	686.918	0.319899	0.259944	0.554266	0.369347	0.436634	0.458193
test_2022_05_05_14_58	147.707	0.764214	277.234	2198.99	713.26	87.9945	0.757625	184.397	2384.55	701.153	0.382962	0.314404	0.518574	0.39228	0.445817	0.45362
	223.842	0.815423	298.101	2216.39	646.24	86.2376	0.733528	201.253	2393.67	767.963	0.285384	0.253446	0.564295	0.367575	0.445729	0.456456
	188.076	0.777331	270.956	2098.54	668.032	73.197	0.708188	192.19	2225.08	770.226	0.282159	0.317657	0.542466	0.383791	0.439306	0.462762
	154.839	0.80912	282.161	2107.33	622.559	60.8548	0.734704	157.728	2218.62	687.297	0.294179	0.263285	0.581858	0.367798	0.442694	0.462694
	157.31	0.798757	279.736	2142.82	636.8	61.4569	0.784093	171.815	2517.69	668.241	0.288113	0.25755	0.571306	0.37305	0.440363	0.451123
	186.36	0.787232	299.693	2209.73	691.555	70.9289	0.7433	188.804	2368.05	734.041	0.286113	0.287016	0.543793	0.379785	0.443028	0.455846
	210.407	0.802895	276.386	2133.8	629.086	86.8293	0.743561	191.129	2362.65	739.287	0.294259	0.265779	0.558014	0.369356	0.444501	0.455838
	190.942	0.813606	239.459	1994.25	560.861	74.1243	0.757183	207.282	2332.08	703.032	0.287658	0.247612	0.572042	0.36799	0.456304	0.446847
	204.515	0.770265	291.31	2197.47	720.84	118.707	0.751267	195.585	2452.26	749.492	0.364043	0.306918	0.526824	0.389724	0.442208	0.4526
	156.544	0.801543	294.767	2243.6	669.909	68.359	0.772725	172.975	2218.81	621.002	0.305614	0.259151	0.555611	0.373911	0.455278	0.444864
	188.892	0.808621	309.805	2190.37	660.716	76.8679	0.71978	219.708	2486.71	835.784	0.304158	0.268592	0.572603	0.368029	0.422818	0.456952
	200.853	0.768379	287.06	2042.5	686.784	87.2206	0.762059	175.252	2395.61	695.842	0.301873	0.305339	0.553644	0.383838	0.455875	0.455037
	220.124	0.800322	299.845	2319.98	693.123	81.3371	0.732908	230.39	2465.39	809.207	0.278847	0.274442	0.549421	0.377235	0.431923	0.456327
	175.5	0.794922	303.708	2262.63	691.983	64.8397	0.76287	184.438	2406.21	701.13	0.296179	0.271473	0.552307	0.376808	0.437975	0.453445
	204.446	0.779001	281.846	2190.26	697.907	79.7481	0.746285	170.269	2218.34	679.495	0.285177	0.296333	0.532435	0.387069	0.457883	0.454691
	182.205	0.798251	320.371	2243.63	698.222	67.8279	0.739377	172.413	2327.86	711.575	0.282322	0.276091	0.559364	0.374742	0.448357	0.458341
	140.766	0.772601	309.303	2305.22	743.274	72.1712	0.76998	195.517	2358.99	679.897	0.38548	0.294868	0.520144	0.389549	0.463584	0.446901
	196.333	0.769915	277.558	2284.12	730.96	81.6111	0.745307	173.654	2267.44	699.095	0.307521	0.310415	0.503108	0.393009	0.447552	0.459619
	263.346	0.773368	281.559	2168.59	702.714	111.27	0.714776	226.722	2319.41	802.692	0.295927	0.318752	0.532973	0.389341	0.453103	0.457032
	237.103	0.78088	312.329	2155.28	706.518	89.5321	0.752844	177.772	2417.34	719.218	0.280462	0.292957	0.550057	0.38206	0.446105	0.456397
	163.094	0.765822	274.848	2294.97	734.731	227.496	0.716659	217.613	2138.57	758.575	0.556076	0.327757	0.507907	0.39683	0.463027	0.454902
	192.336	0.789785	302.524	2134.63	678.088	71.0172	0.757014	196.005	2333.75	704.775	0.278834	0.279286	0.548649	0.377092	0.462589	0.448619
	208.95	0.807459	303.701	2374.47	694.043	62.9613	0.782579	177.515	2325.89	624.186	0.246898	0.247564	0.538247	0.376174	0.466594	0.442159
	227.621	0.788398	309.123	2176.48	696.319	156.349	0.747123	223.938	2357.22	750.9	0.35792	0.284616	0.553603	0.379261	0.473862	0.449004
	150.893	0.763925	252.254	2019.69	658.713	68.44	0.757211	192.417	2369.27	702.346	0.330801	0.312759	0.525148	0.389815	0.454581	0.447068
	233.124	0.806234	311.745	2071.77	649.765	139.989	0.754803	223.557	2302.29	726.068	0.350148	0.257557	0.580584	0.368501	0.487934	0.445719
	202.243	0.79915	290.284	2119.19	643.373	74.0821	0.762535	203.148	2371.8	690.978	0.269763	0.265207	0.560393	0.372206	0.469767	0.442037
	184.899	0.795589	302.956	2155.74	672.718	58.6709	0.759941	194.875	2384.9	701.75	0.248208	0.271062	0.564726	0.375624	0.464639	0.446352
	180.761	0.799303	308.899	2047.24	648.146	62.7273	0.768537	147.63	2260.29	627.603	0.265608	0.261056	0.597676	0.366335	0.456632	0.455429
	202.718	0.803786	298.364	2146.82	658.597	71.7845	0.749146	224.36	2372.33	737.917	0.265747	0.263986	0.563259	0.372597	0.462515	0.446392
	206.839	0.768293	313.442	2385.46	780.791	96.8	0.75807	188.359	2413.78	702.067	0.301523	0.308599	0.504679	0.391474	0.451092	0.44889
	199.644	0.840025	306.07	2228.99	608.216	80.7696	0.759199	204.002	2311.44	701.029	0.295632	0.210684	0.599201	0.352063	0.462495	0.447689
	133.492	0.790822	306.067	2358.77	717.553	59.1825	0.777286	189.837	2220.39	625.48	0.312944	0.270111	0.527368	0.380903	0.484315	0.438393
	162.208	0.786079	296.514	2157.93	684.723	55.1674	0.780175	183.867	2510.94	675.409	0.26721	0.276037	0.546943	0.380712	0.449368	0.444267
	172.198	0.779809	307.245	2061.87	681.279	62.1908	0.762455	178.758	2092.19	621.869	0.271566	0.289443	0.557809	0.376145	0.470247	0.44942
	206.837	0.800034	327.798	2257.42	705.093	64.9542	0.748988	195.628	2169.09	678.293	0.244766	0.26848	0.566008	0.375396	0.476472	0.447135
	140.768	0.790862	303.559	2524.4	752.617	60.1158	0.741937	180.091	2154.88	670.975	0.317937	0.284394	0.517114	0.384396	0.464872	0.452931
	187.373	0.800022	332.909	2363.88	726.812	52.4928	0.778692	175.875	2568.09	678.887	0.232263	0.258217	0.551347	0.37563	0.436456	0.448202
	186.552	0.801246	296.967	2283.34	684.725	54.3427	0.773449	187.282	2433.75	690.583	0.2299	0.257872	0.544239	0.37563	0.451863	0.448348
	156.793	0.800159	296.465	2265.36	675.074	46.5111	0.742748	230.797	2393.69	758.45	0.238533	0.272162	0.561371	0.374853	0.462819	0.449687
	201.851	0.807829	317.562	2439.78	718.827	68.5	0.760387	218.883	2507.42	745.876	0.257971	0.253051	0.546716	0.375035	0.460511	0.448899
	209.123	0.766719	341.983	2516.93	835.966	62.582	0.772634	165.668	2387.17	651.061	0.244624	0.303363	0.51257	0.393199	0.449523	0.448011
	175.756	0.793784	321.361	2265.49	710.192	64.8487	0.776029	177.236	2223.01	621.398	0.272606	0.267327	0.552623	0.376322	0.463515	0.44458
	149.476	0.773235	335.395	2412.34	790.755	56.0602	0.777212	180.005	2296.52	635.597	0.276036	0.29335	0.521518	0.383949	0.467116	0.44741
	167.5	0.793292	339.928	2345.17	736.702	52.4139	0.790214	163.027	2187.36	566.581	0.251151	0.263419	0.550026	0.376049	0.47762	0.441357
	139.365	0.824915	343.22	2467.9	708.026	52.3594	0.786284	179.336	2239.94	605.658	0.275679	0.223395	0.562541	0.367125	0.496374	0.439045
	168.332	0.783902	305.821	2331.84	728.332	50.5957	0.783716	179.635	2134.33	586.659	0.236015	0.277021	0.53691	0.382765	0.497225	0.438565
	150.861	0.78335	312.945	2477.67	764.868	50.8122	0.783161	174.1	2148.41	591.593	0.256684	0.277933	0.520882	0.385434	0.491498	0.441525
	206.806	0.786139	323.119	2438.94	762.735	54.585	0.78299	176.179	2236.22	605.93	0.225548	0.273602	0.528676	0.384952	0.491925	0.442276
	134.641	0.786992	344.342	2418	757.973	39.7436	0.793005	188.542	2375.02	609.953	0.237462	0.26923	0.532988	0.38188	0.487248	0.434403
	144.963	0.788041	307.142	2294.69	720.798	43.713	0.796368	181.61	2620.11	650.104	0.234822	0.267742	0.550709	0.380445	0.458567	0.433879
	128.861	0.811502	344.472	2463.5	719.75	38.1128	0.793146	155.354	2288.95	564.103	0.267634	0.240851	0.55838	0.369452	0.476049	0.435517
	182.504	0.814286	327.19	2502.31	717.496	49.1304	0.794208	217.996	2366.15	641.663	0.219313	0.235954	0.548747	0.372122	0.494944	0.428911
	147.353	0.804544	363.49	2664.71	791.835	46.038	0.779907	173.338	2319.77	626.093	0.247789	0.252748	0.544691	0.374813	0.454814	0.443785
	158.996	0.784673	342.555	2356.12	766.612	44.6692	0.796645	189.296	2383.53	609.334	0.226294	0.272704	0.539087	0.381699	0.481063	0.431622
	142.833	0.784055	338.408	2313.49	737.144	45.2857	0.809072	209.267	2748.5	661.987	0.248145	0.26569	0.540904	0.377783	0.470537	0.42379
	179.915	0.782667	307.587	2304.26	730.545	41.0692	0.809641	210.436	2745.16	681.622	0.193153	0.268613	0.543212	0.383656	0.478104	0.428182
	131.47	0.793795	353.874	2361.66	748.977	39.1565	0.782881	218.582	2047.14	589.091	0.230601	0.265545	0.56099	0.375424	0.513739	0.427583
	94.2598	0.819353	333.943	2442.96	699.612	30.1024	0.790383	216.047	2800.83	686.009	0.246711	0.230928	0.575367	0.36481	0.464383	0.433172
	121.39	0.781081	338.714	2483.86	794.573	34.2253	0.802862	206.992	2609.69	650.905	0.229195	0.275675	0.528913	0.385452	0.476684	0.43074
	151.333	0.77019	346.598	2382.42	798.146	39.2222	0.803263	221.077	2772.62	698.248	0.214764	0.288423	0.541858	0.386039	0.472601	0.43004
	97.7778	0.793086	332.806	2373.54	728.793	31.4747	0.784395	240.376	2505.24	701.551	0.247876	0.26559	0.567313	0.374738	0.470618	0.431266
	207.706	0.790749	323.294	2563.41	775.917	52.2209	0.779764	183.177	2104.48	585.908	0.20244	0.269442	0.519662	0.383685	0.518733	0.436658
	122.108	0.77982	323.366	2283.73	735.62	41.0723	0.786251	181.179	2080.03	557.323	0.257878	0.281016	0.538763	0.38068	0.498864	0.428451
	147.568	0.814025	365.47	2574.58	755.949	42.9253	0.794089	165.105	2359.97	597.547	0.226019	0.236208	0.565425	0.369083	0.48515	0.439116
	138.252	0.759009	391.303	2881.46	972.048	62.4056	0.779866	222.709	2437.02	685.467	0.291199	0.310034	0.475616	0.39524	0.492572	0.432659
	116.237	0.805079	363.44	2521.84	773.134	30.6158	0.7553	233.493	2229.11	685.142	0.213104	0.261841	0.554537	0.376029	0.510229	0.441106
	148.05	0.800539	322.887	2375.83	723.136	35.0939	0.780652	179.468	2341.95	628.022	0.190544	0.257543	0.548486	0.376066	0.488847	0.44134
	123.455	0.801894	363.937	2883.33	847.379	28.2182	0.790254	184.876	2414.3	622.395	0.197831	0.252991	0.528521	0.377274	0.485862	0.430852
	98.4848	0.785757	383.086	2857.91	893.205	30.3636	0.763864	213.833	2256.64	659.899	0.244019	0.283015	0.515946	0.386205	0.493238	0.438642
	137.077	0.825171	423.144	3007.32	862.006	36.1923	0.784231	218.085	2245.4	625.582	0.214749	0.223456	0.544578	0.369631	0.496295	0.431936
	91.5324	0.791515	374.862	2717.3	834.84	23.8022	0.801176	202.134	2520.95	627.467	0.208172	0.262477	0.53348	0.380341	0.489489	0.430439
	113.918	0.766857	364.523	2669.66	885.931	40.0943	0.773936	243.245	2215.55	659.069	0.258081	0.305997	0.505167	0.393595	0.513379	0.439947
	97.3766	0.782652	393.502	2793.48	889.333	30.1558	0.759213	210.788	2287.61	696.645	0.243177	0.28902	0.500084	0.384827	0.502524	0.444731
	113.426	0.782923	347.983	2772.04	851.824	29.0919	0.807951	164.507	2188.44	542.815	0.259277	0.270749	0.504372	0.388279	0.504782	0.432828
	142.733	0.78823	340.179	2646.35	817.05	39.5698	0.807343	159.223	2154.41	525.515	0.214179	0.263589	0.514117	0.386807	0.514877	0.431991
	141.583	0.775837	361.986	2606.18	848.775	35.8261	0.805129	162.367	2049.54	513.223	0.199783	0.280151	0.520225	0.387117	0.541887	0.427838
	121.953	0.792365	337.718	2448.4	764.515	28.1176	0.790589	165.557	2106.8	534.718	0.189354	0.265483	0.560512	0.374435	0.498699	0.426939
	98.7934	0.773729	327.179	2423.38	778.973	30.1322	0.761275	178.557	2250.07	626.823	0.230716	0.301672	0.545712	0.383637	0.509502	0.445704
	108.615	0.777212	352.723	2485.62	791.054	27.375	0.814023	183.42	2406.58	571.726	0.198612	0.277145	0.549522	0.381409	0.514282	0.432106
	112.124	0.807371	371.348	2879.62	841.643	26.485	0.798402	208.278	2410.27	613.474	0.196826	0.245121	0.530658	0.37701	0.497512	0.428094
	85.8756	0.799442	391.949	2998.95	870.559	26.2311	0.78517	191.212	2339.12	594.954	0.238531	0.258207	0.51895	0.37696	0.514936	0.428178
	79.8821	0.772746	397.155	2902.93	937.928	30.4179	0.791534	217.666	2339.61	618.314	0.267748	0.291366	0.511367	0.390741	0.530793	0.425376
	62.1436	0.790153	330.306	2442.42	731.917	21.1179	0.787378	168.4	2095.37	522.85	0.256341	0.27171	0.559237	0.374327	0.537509	0.428901
	83.4388	0.811016	452.062	3310.04	969.884	21.9235	0.793875	180.989	2283.81	570.956	0.212063	0.242006	0.504484	0.378635	0.499322	0.428903
	78.9239	0.792806	384.7	2824.42	841.762	23.7826	0.760916	208.594	2154.2	636.328	0.232704	0.276684	0.528724	0.376127	0.555722	0.437146
	74.7778	0.794425	398.884	2852.02	881.668	18.375	0.827905	206.531	2616.62	579.702	0.198075	0.250246	0.540941	0.38227	0.503587	0.416683
	78.971	0.761671	362.936	2432.37	825.71	28.6377	0.822129	159.345	2082.7	486.001	0.2526	0.290075	0.533045	0.386738	0.542977	0.424371
test_2022_05_05_15_00	181.225	0.800184	299.808	2140.19	659.663	100.324	0.714217	283.051	2658.84	943.491	0.359162	0.280104	0.564665	0.372181	0.45406	0.452916
test_2022_05_05_15_01	140.182	0.819862	276.688	2191.71	606.103	51.0881	0.703327	300.681	2829.89	1022.89	0.273154	0.260109	0.584917	0.361382	0.426887	0.454472
	168.696	0.812253	295.923	2586.22	718.386	81.0633	0.726741	316.811	2978.23	1032.41	0.329913	0.258811	0.529791	0.375509	0.409344	0.446994
	170.755	0.789601	291.202	2272.25	690.651	82.949	0.712986	286.509	2746.91	969.218	0.349175	0.297329	0.53987	0.378607	0.422975	0.450392
	183.486	0.818674	284.532	2273.53	634.401	73.3704	0.704022	300.211	2700.48	973.517	0.287594	0.263888	0.571067	0.367373	0.429457	0.451051
	169.806	0.813603	309.889	2290.24	671.058	72.8657	0.714518	291.717	2945.1	1028.52	0.30816	0.26357	0.571982	0.366608	0.403046	0.455091
	180.331	0.784964	290.771	2203.55	694.286	91.3099	0.710549	301.067	2774.3	998.834	0.348807	0.303965	0.540609	0.381334	0.433447	0.451934
	165.593	0.781128	308.538	2552.7	787.62	87.2712	0.719664	326.642	2919.1	1029.09	0.358657	0.306439	0.509658	0.391236	0.425813	0.447563
	207.62	0.812328	296.819	2170.15	642.259	85.2629	0.710772	282.133	2697.84	950.591	0.295186	0.26613	0.58652	0.364622	0.436388	0.451729
	223.288	0.786621	286.997	2176.52	683.266	91.8767	0.714995	308.279	2709.41	976.894	0.292928	0.300128	0.547328	0.383022	0.439742	0.453274
	215.887	0.775161	316.214	2445.6	784.044	101.525	0.687782	315.557	2688.35	1036.88	0.323776	0.33024	0.507309	0.390432	0.42714	0.45835
	218.019	0.8199	293.574	2258.79	637.273	84.9765	0.684973	286.125	2572.3	972.501	0.28318	0.268211	0.569206	0.363462	0.433343	0.458936
	138.116	0.757808	227.693	2089.44	671.129	63.989	0.718673	271.116	2765.53	924.748	0.327955	0.342381	0.500183	0.399213	0.430797	0.451138
	165.294	0.750653	251.41	2132.27	713.704	84.5621	0.722814	264.775	2634.2	897.226	0.343315	0.346204	0.498356	0.401307	0.443101	0.450638
	176.537	0.781242	323.846	2364.7	756.815	68.2474	0.730489	241.272	2712.85	888.15	0.287047	0.300369	0.531922	0.385069	0.426723	0.451823
	141.946	0.787342	294.476	2173.1	680.946	83.3913	0.726513	260.956	2685.5	912.279	0.396542	0.294438	0.545833	0.380428	0.435298	0.451912
	244.221	0.811413	292.948	2030.93	613.447	107.337	0.694322	300.253	2429.98	935.752	0.304918	0.272612	0.591812	0.363078	0.454237	0.456116
	273.255	0.779227	312.795	2302.79	743.529	99.8859	0.686927	335.996	2619.53	1008.3	0.270372	0.326985	0.534384	0.384884	0.446949	0.453832
	211.088	0.811538	306.005	2262.22	666.556	73.6486	0.712702	262.542	2590.05	911.49	0.267203	0.266869	0.571362	0.370341	0.445011	0.454369
	206.384	0.801722	304.384	2095.53	650.814	72.1575	0.726908	243	2659.83	880.963	0.280481	0.274745	0.585912	0.368376	0.426834	0.452508
	192.589	0.779005	275.825	2155.96	685.192	93.7656	0.722352	312.235	2795.2	986.314	0.337023	0.306923	0.531198	0.386536	0.437955	0.449712
	169.991	0.784657	319.907	2334.45	741.309	78.2818	0.690046	291.661	2474.48	944.766	0.316305	0.315994	0.542811	0.383295	0.450867	0.458735
	230.863	0.797099	305.905	2082.23	658.829	74.3664	0.708158	294.047	2598.53	934.825	0.250662	0.289236	0.578198	0.370757	0.460681	0.453242
	264.968	0.794341	338.435	2321	739.234	89.6211	0.713544	289.557	2561.08	918.634	0.261568	0.28948	0.550127	0.378039	0.461984	0.454574
	193.059	0.793262	299.168	2130.25	669.816	65.9176	0.715275	242.448	2483.47	865.272	0.268741	0.290754	0.562548	0.375667	0.438619	0.455575
	141.431	0.772673	260.489	2146.1	677.678	44	0.73372	310.201	2773.47	928.713	0.245456	0.315489	0.545337	0.383541	0.449413	0.443912
	213.944	0.791718	319.997	2111.37	684.741	75.2746	0.711731	309.79	2679.77	967.407	0.269733	0.294592	0.559984	0.375763	0.449465	0.451118
	160.194	0.80613	288.548	2161.77	644.088	68.346	0.748469	288.165	2781.95	894.317	0.308186	0.26024	0.571195	0.371318	0.452525	0.44407
	152.43	0.786495	312.196	2261.71	715.793	50.8318	0.741508	377.785	2962.79	1005.49	0.256273	0.289222	0.553697	0.378353	0.4488	0.440878
	200.936	0.781962	305.534	2399.91	753.65	79.1	0.720277	282.954	2658.36	914.696	0.287829	0.30625	0.52357	0.389608	0.439514	0.449655
	203.637	0.801283	320.323	2271.16	699.913	61.5732	0.691732	287.907	2399.38	906.783	0.238319	0.29208	0.561131	0.374027	0.460862	0.460816
	129.816	0.804804	264.36	2035.24	595.948	56.1013	0.767068	258.869	2928.65	863.05	0.314369	0.256359	0.57473	0.364876	0.440454	0.440362
	163.567	0.81453	304.315	2414.7	682.158	49.6374	0.726199	308.982	2791.49	959.139	0.239899	0.2574	0.558415	0.369797	0.442119	0.447363
	159.594	0.770136	303.306	2192.39	725.607	50.5355	0.726411	241.826	2753.19	882.058	0.25769	0.319384	0.549926	0.381849	0.430555	0.451669
	169.626	0.801044	266.269	2181.34	629.467	60.2477	0.748058	272.109	2579.06	817.38	0.26644	0.268497	0.549974	0.372809	0.466932	0.439383
	176.688	0.827061	315.267	2463.09	680.356	59.4573	0.745648	236.805	2693.52	833.941	0.261556	0.232785	0.563429	0.365793	0.44189	0.446278
	126.939	0.752916	332.459	2540.3	865.871	57.0816	0.71221	290.96	2495.64	897.691	0.324643	0.348472	0.4957	0.398708	0.459854	0.45505
	208.935	0.827936	320.075	2653.49	707.427	73.3056	0.744906	293.752	2946.94	946.113	0.272233	0.232834	0.540004	0.367273	0.422925	0.444031
	200.486	0.80291	327.338	2384.85	725.238	62.75	0.73227	256.698	2614.65	854.066	0.253183	0.271478	0.55459	0.37515	0.446004	0.447155
	157.629	0.757738	340.572	2596.65	877.531	69.4274	0.711727	256.001	2385.09	839.567	0.323047	0.344619	0.498999	0.399449	0.450943	0.450854
	211.051	0.800272	319.049	2159.51	678.326	61.801	0.748792	256.616	2715.03	829.29	0.230724	0.271273	0.56455	0.370331	0.449366	0.43944
	265.78	0.810951	327.751	2308.21	694.675	78.2045	0.75376	298.037	2874.58	907.772	0.229737	0.252621	0.561316	0.370293	0.450882	0.442478
	203.022	0.801623	322.361	2501.61	747.321	84.1803	0.766666	284.928	2762.96	848.168	0.287549	0.259725	0.540221	0.379849	0.463367	0.436777
	192.957	0.808979	320.503	2449.72	718.63	69.7826	0.748734	256.331	2474.63	795.984	0.267719	0.255549	0.542335	0.372893	0.481734	0.44443
	204.852	0.806684	315.891	2422.14	716.216	61.3086	0.73852	286.188	2938.91	919.889	0.234617	0.263758	0.549084	0.375102	0.446168	0.44894
	255.777	0.811286	332.509	2353.13	705.109	65.2397	0.743269	321.406	2840.44	919.398	0.200418	0.255797	0.556785	0.370797	0.473136	0.442914
	183.358	0.79966	325.387	2297.63	711.499	57.274	0.752	256.635	2555.38	795.304	0.243545	0.268695	0.563957	0.370821	0.483843	0.442105
	219.918	0.78815	331.074	2413.76	759.419	62.0328	0.752676	240.303	2611.05	810.691	0.222284	0.283015	0.532543	0.382892	0.462105	0.444173
	179.337	0.779472	321.58	2403.92	765.502	62.8123	0.765063	260.133	2565.18	779.876	0.267295	0.290772	0.520505	0.385493	0.485611	0.438413
	210.16	0.820717	334.779	2286.66	679.847	50.7395	0.749052	270.707	2756.82	877.106	0.198028	0.24215	0.588216	0.361726	0.453147	0.448118
	183.535	0.822757	329.09	2459.54	692.503	49.8713	0.740957	291.059	2766.97	885.439	0.220496	0.241732	0.564859	0.364093	0.462485	0.441936
	207.455	0.809635	329.338	2450.18	723.844	52.7432	0.720531	290.142	2585.73	890.04	0.212489	0.265949	0.55633	0.373274	0.459253	0.448157
	169.809	0.775911	323.977	2419.9	775.01	47.6822	0.729494	264.949	2734.25	895.179	0.22499	0.310997	0.531154	0.385382	0.441452	0.452212
	198.938	0.799168	331.406	2238.41	705.606	50.8646	0.740702	293.613	2725.51	892.988	0.207201	0.271224	0.581897	0.372218	0.46681	0.444723
	125.852	0.786292	316.667	2352.15	733.324	54.0174	0.756612	215.506	2478.77	728.106	0.348138	0.287312	0.532143	0.379649	0.45384	0.445027
	161.61	0.811818	318.451	2353.98	697.227	46.2353	0.782025	264.344	2701.29	769.099	0.232491	0.241894	0.564626	0.369558	0.452501	0.43554
	177.427	0.812158	309.779	2378.37	692.802	47.916	0.736747	281.145	2665.74	873.981	0.220684	0.259408	0.567451	0.370732	0.459259	0.446389
	171.838	0.794365	328.642	2455.49	751.04	53.9538	0.737295	286.327	2559.82	847.96	0.241465	0.282825	0.539817	0.379547	0.474364	0.446092
	183.596	0.800854	313.53	2365.59	713.365	47.3576	0.698996	243.218	2236.02	786.255	0.206243	0.291952	0.531357	0.376136	0.480497	0.447506
	192.536	0.796995	320.459	2405.43	732.651	51.6031	0.759062	264.731	2444.37	760.389	0.213367	0.269222	0.532598	0.378541	0.498276	0.435752
	194.747	0.784755	346.226	2493.78	798.482	58.3636	0.750782	265.989	2573.74	815.174	0.23424	0.289355	0.529465	0.384395	0.473267	0.441513
	141.871	0.807436	326.764	2304.33	692.478	42.2258	0.759115	277.815	2743.93	851.523	0.239265	0.256411	0.55417	0.37023	0.463651	0.439607
	132.478	0.751556	339.43	2332.49	808.827	50.7107	0.777049	269.229	2737.14	794.974	0.27979	0.321432	0.526989	0.390887	0.476535	0.434595
	160.065	0.805575	330.087	2267.93	695.102	36.0841	0.765455	302.505	2876.53	890.362	0.186449	0.254549	0.588384	0.367807	0.456359	0.439338
	158.47	0.794915	323.981	2585.56	780.943	46.1216	0.750079	277.227	2638.57	827.689	0.227776	0.277295	0.522241	0.383234	0.477671	0.44291
	140.682	0.799466	360.227	2695.27	806.193	42.6872	0.748394	278.134	2703.23	849.558	0.240291	0.268963	0.548513	0.376659	0.460681	0.440858
	147.221	0.792261	333.221	2284.19	717.816	49.3274	0.737726	292.413	2613.96	868.066	0.257423	0.287096	0.560148	0.374107	0.474088	0.440218
	139.777	0.773409	313.698	2221.19	724.914	51.4653	0.755044	304.522	2654.27	833.401	0.259731	0.302045	0.534616	0.38355	0.49796	0.439088
	170.828	0.790513	369.099	2652.9	824.829	50.5706	0.78283	290.298	2770.04	802.935	0.271677	0.26888	0.534907	0.381191	0.488135	0.430442
	143.997	0.809601	311.223	2399.17	696.819	34.7804	0.778124	204.657	2671.62	731.411	0.208526	0.246676	0.558453	0.368518	0.454084	0.439813
	142.635	0.772463	357.669	2689.09	868.173	30.7083	0.783929	202.081	2642.26	684.3	0.187863	0.294971	0.493261	0.390532	0.46777	0.433345
	131.02	0.79311	354.252	2541.57	786.608	35	0.767647	255.955	2715.95	792.856	0.219941	0.274411	0.548829	0.377733	0.467049	0.436768
	141.196	0.781139	329.47	2451.77	776.1	47.8315	0.77582	283.941	2775.47	816.189	0.265304	0.283078	0.525357	0.385179	0.47271	0.433261
	179.206	0.814688	323.274	2503.75	707.384	36.9338	0.729646	271.19	2521.29	838.683	0.182979	0.257934	0.552641	0.368858	0.467929	0.448197
	115.116	0.823942	352.165	2646.15	739.674	25.8011	0.78793	266.507	2855.94	765.806	0.189767	0.226427	0.576141	0.364093	0.455244	0.430094
	129.618	0.786849	366.517	2914.76	900.515	29.9145	0.78099	280.704	2781.83	778.402	0.194957	0.274799	0.484868	0.389334	0.484318	0.428292
	119.35	0.817234	361.073	2535.29	745.126	26.6542	0.787668	202.565	2381.43	628.652	0.185177	0.23314	0.567408	0.367237	0.52047	0.433046
	107.141	0.823075	342.497	2605.01	725.272	24.0683	0.757832	287.44	2760.6	825.457	0.185668	0.23686	0.576807	0.365344	0.473019	0.435369
	105.549	0.807766	349.948	2819.41	806.287	30.1831	0.781941	264.677	2730.75	761.932	0.220591	0.24715	0.537053	0.37411	0.496466	0.43106
	112.184	0.779391	384.844	2726.06	875.178	27.2313	0.751047	339.445	2467.2	794.595	0.214663	0.303153	0.514237	0.384257	0.524761	0.434016
	91.5372	0.809487	379.449	2817.39	827.7	24.843	0.774157	324.944	2714.72	809.275	0.214463	0.251849	0.523877	0.37342	0.50484	0.431743
	98.8052	0.796519	403.246	2749.43	866.955	28.1948	0.784535	255.474	2581.09	699.988	0.221301	0.262567	0.508014	0.383265	0.519754	0.42159
	88.0294	0.787544	363.79	2659.31	834.851	23.3824	0.788749	292.509	2600.47	705.336	0.206733	0.272567	0.540011	0.381356	0.557047	0.419459
	85.8602	0.815292	398.5	3065.58	864.938	23.4731	0.792106	304.124	2781.77	758.103	0.217864	0.238128	0.5336	0.371276	0.508028	0.423214
	76.5926	0.819564	403.47	3154.82	877.701	24.1759	0.772701	304.757	2634.36	764.037	0.240193	0.236783	0.521229	0.371492	0.529329	0.428024
	74.0541	0.802783	376.693	2718.95	821.056	21.7432	0.790999	311.867	2807.45	739.396	0.228375	0.254225	0.549368	0.378786	0.532835	0.414247
	91.9234	0.793445	373.542	2669.54	818.295	25.8182	0.786857	310.547	2714.53	779.197	0.216295	0.265812	0.551609	0.378166	0.514925	0.424333
test_2022_05_05_15_03	90.1933	0.758931	267.802	2053.66	684.23	56.7933	0.720169	213.26	2530.45	828.202	0.395537	0.337964	0.519667	0.390194	0.445741	0.441324
test_2022_05_05_15_05	164.192	0.778231	298.678	2390.55	747.865	72.558	0.712655	229.175	2601.71	896.085	0.322137	0.312146	0.525361	0.39022	0.437936	0.439388
	121.374	0.79157	281.255	2311.06	687.475	72.0226	0.730515	223.929	2454.6	797.239	0.375387	0.287718	0.522972	0.3838	0.467228	0.428212
	121.78	0.787451	303.142	2518.88	756.063	78.239	0.728467	235.711	2422.82	806.785	0.393423	0.293744	0.499571	0.38806	0.484389	0.428788
	144.627	0.811211	278.06	2285.26	646.569	63.6824	0.726122	224.421	2554.09	838.8	0.311395	0.263062	0.55477	0.372224	0.455258	0.433022
	159.893	0.782906	330.272	2473.55	783.262	78.8527	0.735497	274.317	2692.9	894.346	0.338192	0.297177	0.517092	0.388156	0.451224	0.42424
	149.506	0.810479	305.118	2354.58	683.038	63.2146	0.741264	231.008	2469.04	793.547	0.307393	0.256876	0.548694	0.37338	0.464959	0.430418
	172.207	0.819008	312.466	2341.11	666.151	55.6432	0.731086	234.157	2474.58	810.252	0.259928	0.250871	0.559435	0.369352	0.476822	0.428371
	187.643	0.784967	282.257	2059.48	655.329	73.5863	0.698593	248.28	2303.41	838.158	0.286307	0.311513	0.554498	0.379836	0.477037	0.434298
	123.418	0.810312	317.523	2251.29	667.965	50.9322	0.749431	242.994	2475.86	764.207	0.297994	0.257962	0.570142	0.367716	0.493523	0.420548
	126.53	0.799723	285.6	2304.54	680.659	61.2179	0.725294	238.08	2397.07	812.649	0.329285	0.279452	0.543742	0.381114	0.482996	0.429601
	162.924	0.813008	314.906	2388.19	689.387	74.0759	0.76615	233.426	2492.04	742.859	0.313935	0.245898	0.555595	0.373717	0.508703	0.416753
	158.04	0.796283	285.502	2283.16	681.632	64.1086	0.740712	284.622	2619.62	854.719	0.291083	0.278171	0.533534	0.381701	0.489007	0.41945
	127.724	0.808665	301.974	2250.13	663.617	55.0353	0.75805	215.039	2630.2	783.979	0.298653	0.253856	0.556851	0.371102	0.469431	0.426736
	114.753	0.803806	291.77	2285.82	672.767	51.4943	0.748823	249.52	2459.89	769.028	0.31052	0.264843	0.556446	0.377502	0.502065	0.417477
	164.717	0.808178	308.769	2374.28	694.323	54.8761	0.724745	283.829	2669.61	896.708	0.251424	0.270116	0.547019	0.376242	0.468626	0.426482
	169.662	0.785888	306.799	2241.26	706.161	75.013	0.731931	231.506	2273.1	746.311	0.312456	0.296079	0.541307	0.382087	0.496936	0.422021
	160.873	0.791173	308.651	2297.07	708.756	62.5287	0.747579	286.448	2677.17	869.372	0.291518	0.280113	0.523382	0.383282	0.481571	0.422456
	154.908	0.793643	305.926	2312.82	696.54	73.3615	0.709322	263.277	2515.37	895.961	0.325104	0.298233	0.538606	0.377443	0.455599	0.434915
	162.731	0.777469	275.222	2177.84	687.951	86.2188	0.753728	241.961	2471.58	774.298	0.354489	0.296652	0.526615	0.388523	0.485359	0.424487
	163.582	0.794843	298.713	2493.27	740.464	62.4539	0.737547	218.338	2320.52	744.901	0.282548	0.279701	0.505788	0.386905	0.491436	0.42655
	159.894	0.793717	288.414	2210.3	675.282	54.5531	0.736158	265.982	2617.14	835.845	0.267056	0.285007	0.550655	0.380264	0.485729	0.420101
	148.79	0.808442	287.602	2366.15	678.298	49.3951	0.757363	216.12	2698.92	790.224	0.256705	0.255641	0.54589	0.37683	0.46353	0.427433
	136.784	0.806854	308.223	2303.34	668.176	51.4381	0.753501	246.839	2594.08	802.028	0.280742	0.257793	0.555317	0.369195	0.475854	0.428592
	150.966	0.789955	303.709	2356.69	723.113	57.7128	0.747522	221.102	2501.8	769.551	0.285143	0.283443	0.532496	0.384147	0.470418	0.428106
	122.982	0.806189	298.218	2264.72	658.973	46.4671	0.779115	193.713	2321.78	644.258	0.282047	0.251756	0.572455	0.370409	0.519935	0.41412
	110.014	0.75516	319.123	2523.94	834.558	45.5775	0.750794	262.119	2513.95	775.937	0.304644	0.331902	0.478781	0.399453	0.49309	0.412385
	148.93	0.786256	307.576	2350.74	734.683	53.0857	0.742624	237.221	2389.24	762.415	0.262439	0.289832	0.525836	0.385421	0.502593	0.422302
	205.109	0.776844	334.638	2358.37	768.127	68.9219	0.75229	231.073	2434	772.544	0.255044	0.296003	0.528244	0.386669	0.492367	0.425871
	135.948	0.800816	321.709	2266.26	691.083	54.9895	0.769168	222.066	2304.16	683.699	0.292267	0.260953	0.562464	0.373334	0.525477	0.413815
	110.699	0.770569	325.195	2534.48	790.616	50.3974	0.773839	195.631	2396.44	670.259	0.381223	0.296949	0.504028	0.389173	0.492962	0.419957
	156.495	0.798096	330.766	2361.09	721.486	40.4151	0.746476	232.781	2361.38	725.221	0.215702	0.273681	0.553705	0.373602	0.494429	0.421775
	138.812	0.782949	313.615	2493.92	763.716	66.7537	0.754461	252.033	2430.19	765.237	0.34661	0.290313	0.511025	0.388809	0.498849	0.416639
	125.867	0.7623	306.309	2256.71	756.949	60.4	0.761384	221.494	2332.99	716.72	0.348096	0.314414	0.514802	0.393446	0.505765	0.422543
	110.962	0.762307	316.379	2768.17	875.419	49.1333	0.761773	188.94	2166.52	636.881	0.313347	0.313887	0.478883	0.396329	0.512644	0.416072
	110.829	0.797806	303.132	2244.38	675.885	47.1595	0.764372	204.489	2288.53	668.96	0.302336	0.264837	0.554477	0.373183	0.511114	0.415356
	136.94	0.813075	313.249	2350.68	674.358	49.815	0.75587	239.088	2448.6	748.817	0.263129	0.250615	0.553574	0.368594	0.498247	0.418909
	136.737	0.79416	359.86	2546.73	789.05	53.4009	0.772537	227.255	2524.5	729.419	0.287562	0.267583	0.533018	0.380026	0.506548	0.41767
	150.492	0.793751	356.372	2625.64	807.942	53.636	0.759772	246.71	2404.78	739.169	0.272338	0.272541	0.51952	0.383592	0.513515	0.414086
	93.6231	0.806564	294.51	2305.72	660.605	42.0154	0.76485	224.148	2378.43	709.906	0.31694	0.254298	0.551474	0.37316	0.506223	0.418169
	160.431	0.795336	350.865	2475.86	765.604	35.9741	0.780948	204.124	2377.92	655.246	0.198285	0.264184	0.548795	0.375896	0.511235	0.415129
	162.687	0.796554	320.23	2463.76	737.485	48.3053	0.779463	217.418	2380.55	675.073	0.236021	0.2622	0.535007	0.378474	0.515376	0.41253
	111.706	0.782723	339.292	2461.15	787.931	39.0941	0.808053	200.811	2831.51	671.667	0.258667	0.270091	0.532314	0.383849	0.471298	0.407273
	86.381	0.794606	319.493	2455.22	734.505	43.3048	0.763526	268.408	2546.31	762.347	0.331391	0.272309	0.535493	0.378838	0.523901	0.410987
	105.42	0.801047	291.823	2026.21	615.428	35.94	0.784556	213.731	2435.06	663.224	0.250614	0.257639	0.595646	0.362517	0.525741	0.408368
	200.854	0.767114	324.482	2409.81	797.107	46.0063	0.799576	256.972	2533.33	692.048	0.197969	0.292901	0.508128	0.392863	0.524983	0.401254
	139.804	0.788574	309.142	2386.5	735.727	47.7457	0.748268	215.21	2306.71	703.958	0.256417	0.287792	0.53032	0.382952	0.503908	0.42122
	116.034	0.779978	371.571	2559.67	830.162	33.9322	0.781298	220.165	2500.78	668.436	0.232732	0.286738	0.527806	0.388575	0.522649	0.404723
	107.371	0.771228	297.287	2254.73	712.809	59.4901	0.769651	249.447	2408.85	722.085	0.358138	0.299682	0.522729	0.38181	0.528346	0.409642
	138.985	0.803083	354.754	2513.45	753.419	46.1275	0.776652	273.827	2631.79	776.311	0.257897	0.253971	0.54679	0.372997	0.513116	0.414319
	141.007	0.804828	368.407	2612.43	781.788	54.5296	0.74776	224.737	2291.79	721.691	0.288321	0.262786	0.549319	0.3737	0.503649	0.422712
	101.905	0.781425	314.897	2388.24	741.646	42.1746	0.791668	255.231	2730.78	726.19	0.29448	0.277982	0.518641	0.385304	0.507757	0.401585
	96.0086	0.789441	314.839	2373.14	719.917	45.1897	0.766067	220.279	2256.75	661.655	0.324621	0.277235	0.547178	0.375061	0.523532	0.40831
	152.225	0.811397	340.252	2431.68	719.366	66.9842	0.756829	254.982	2335.89	736.483	0.299555	0.24942	0.566729	0.370234	0.528975	0.412931
	128.167	0.799958	343.54	2605.17	778.429	40	0.759701	238.63	2301.41	698.505	0.238493	0.266494	0.517701	0.380421	0.52596	0.412732
	157.056	0.797739	306.933	2210.7	679.844	104.171	0.749691	227.529	2268.77	724.416	0.349516	0.271598	0.574779	0.374492	0.517853	0.420569
	92.175	0.812595	312.456	2436.12	697.327	37.2875	0.802462	201.725	2082.63	556.175	0.29801	0.234421	0.53804	0.372329	0.577155	0.390333
	88.9237	0.806533	333.363	2491.12	730.155	36.8554	0.777033	235.333	2444.58	706.826	0.288895	0.251222	0.551326	0.37344	0.525274	0.411913
	112.244	0.808104	336.518	2723.15	773.29	39.4939	0.757203	193.634	2264.82	662.091	0.25921	0.257213	0.520658	0.375386	0.516268	0.419114
	112.917	0.806518	355.378	2777.61	811.044	44.2166	0.759647	194.254	2170.57	642.819	0.2771	0.255728	0.520793	0.377045	0.523419	0.413922
	115.556	0.781533	362.302	2657.82	847.999	68.0915	0.760949	218.512	2297.43	692.67	0.321634	0.288859	0.518241	0.388734	0.514422	0.416246
	102.968	0.807102	324.488	2425.9	707.208	27.9842	0.775655	200.475	2324.11	644.056	0.220044	0.251542	0.553578	0.368853	0.507838	0.414418
	77.8629	0.797927	338.356	2582.38	761.125	37.5029	0.798802	230.773	2573.3	668.436	0.31357	0.253089	0.536947	0.377613	0.522315	0.402201
	118.118	0.786177	386.969	2736.08	866.748	51.0787	0.761426	248.28	2554.94	739.179	0.298487	0.283516	0.522208	0.383475	0.517916	0.410465
	106.306	0.810698	389.718	2656.22	789.466	35.1173	0.75428	227.598	2110.42	659.838	0.244595	0.253252	0.550825	0.369859	0.552717	0.40973
	82.4545	0.830234	370.352	2741.66	761.707	34.6182	0.794478	250.766	2512.1	666.672	0.297162	0.216372	0.578311	0.364476	0.541302	0.39478
	109.575	0.777001	416.289	2950.65	942.79	55.2083	0.756859	216.185	2248.87	686.768	0.327708	0.298448	0.503212	0.387569	0.538862	0.416696
	84.469	0.790671	358.809	2808	860.203	23.1593	0.780514	193.643	2246.53	591.824	0.220829	0.271516	0.5129	0.385712	0.545215	0.402241
	84.726	0.796349	336.893	2602.57	772.485	23.7153	0.788924	242.538	2419.06	636.156	0.222105	0.265306	0.542214	0.378209	0.527992	0.402521
	82.8333	0.781891	345.033	2490.17	790.002	32.8485	0.784346	235.17	2296.17	648.22	0.282537	0.283465	0.544362	0.383973	0.558731	0.403904
	69.5441	0.783215	397.537	2777.31	881.824	22.2255	0.786785	254.267	2550.33	667.147	0.250578	0.281325	0.53568	0.380367	0.524957	0.403123
	102.626	0.786791	345.284	2685.2	818.574	27.6821	0.784152	219.883	2507.6	676.37	0.224232	0.277465	0.516063	0.382721	0.521342	0.413675
	75.9553	0.767878	423.79	2919.05	963.113	25.4431	0.795883	288.302	2728.25	731.217	0.25843	0.296521	0.500554	0.390567	0.534561	0.397817
	66.9412	0.75793	351.71	2548.47	845.645	19.8676	0.755462	263.101	2396.9	738.208	0.230142	0.331004	0.522159	0.390784	0.528769	0.407176
test_2022_05_05_15_07	111.404	0.833773	337.199	2483.73	681.889	46.5532	0.804503	126.221	2269.63	533.555	0.317718	0.207453	0.590755	0.35674	0.42484	0.460761
test_2022_05_05_15_08	103.313	0.78723	349.771	2429.83	772.335	68.4552	0.77232	166.81	2297.93	630.197	0.399504	0.277883	0.542366	0.378464	0.447576	0.461018
	118.921	0.760757	362.133	2721.12	911.976	55.728	0.757256	168.837	2171.28	634.9	0.311996	0.320575	0.489086	0.395035	0.44744	0.467517
	141.86	0.79546	322.271	2448.35	730.259	90.5074	0.793368	143.369	1910.95	503.22	0.396903	0.25824	0.553837	0.373096	0.488787	0.451858
	125.313	0.817223	339.022	2552.25	722.933	54.4073	0.75923	157.373	2120.73	601.381	0.32698	0.241821	0.565706	0.363836	0.443167	0.466262
	100.284	0.807232	364.652	2949.07	830.122	66.0686	0.797176	122.807	2175.48	534.474	0.431557	0.242229	0.508406	0.376413	0.455547	0.461905
	65.2649	0.796012	249.418	2359.69	653.169	40.7947	0.761358	167.918	1919.44	565.96	0.387575	0.271895	0.532872	0.380266	0.49517	0.453334
	111.705	0.788815	357.199	2569.46	800.21	60.4097	0.768592	161.565	2119.78	596.064	0.362763	0.275979	0.54459	0.378784	0.47078	0.459783
	72.379	0.778042	267.973	2210.68	672.953	52.1371	0.805077	176.15	2171.77	553.275	0.409346	0.275924	0.535205	0.38123	0.496501	0.446446
	134.09	0.791259	337.351	2524.83	772.095	86.3964	0.762131	154.994	1851.02	549.644	0.38612	0.273588	0.536562	0.378749	0.49001	0.457778
	170.669	0.791663	354.833	2777.48	845.483	70.9379	0.779307	154.922	2247.2	604.249	0.307604	0.26868	0.508651	0.384	0.455632	0.460594
	101.875	0.795901	313.218	2655.81	772.17	48.0739	0.795453	111.49	2088.57	502.222	0.331955	0.258444	0.525589	0.377944	0.441717	0.464393
	73.3953	0.776697	317.343	2397.8	737.605	56.8081	0.787094	166.517	2187.95	572.469	0.42962	0.284467	0.526829	0.379837	0.477222	0.453393
	81.3744	0.78592	335.07	2570.53	791.232	49.867	0.779725	184.545	2000.37	574.003	0.386359	0.275599	0.527021	0.382759	0.496727	0.455895
	150.253	0.815963	326.042	2648.39	735.842	53.0578	0.763899	193.006	2250.3	659.477	0.27122	0.242438	0.547422	0.370011	0.463514	0.461472
	105.589	0.810939	312.806	2212.97	646.992	49.7143	0.800965	161.109	2166.55	547.272	0.322509	0.237695	0.582115	0.359774	0.483172	0.448543
	126.783	0.808031	341.635	2448.54	723.6	55.9293	0.782702	181.459	2098.88	585.153	0.305316	0.2475	0.55824	0.367636	0.495013	0.452172
	109.758	0.786656	357.407	2748.79	843.602	57.8769	0.789259	167.344	2262.61	586.124	0.349108	0.272098	0.514455	0.384642	0.463219	0.452096
	113.014	0.791883	356.306	2705.13	813.047	55.0138	0.765111	163.227	2066.19	595.62	0.333406	0.273904	0.524746	0.379357	0.470012	0.457895
	120.444	0.808665	327.831	2338.22	695.329	54.7861	0.777816	147.605	1968.29	534.642	0.31551	0.247735	0.575997	0.369309	0.491373	0.458717
	122.178	0.808759	346.872	2466.77	736.641	48.5466	0.784811	166.569	2071.31	558.996	0.289624	0.245735	0.56608	0.368702	0.47548	0.449279
	113.59	0.802609	355.683	2745.27	808.407	48.323	0.801489	146.415	2043.85	505.814	0.313476	0.24686	0.537644	0.375714	0.464071	0.448719
	106.368	0.823544	311.892	2241.14	639.507	48.528	0.809066	165.244	2158.53	528.949	0.326779	0.218477	0.575939	0.359343	0.487622	0.446442
	112.763	0.779233	405.713	3004.37	947.613	45.5625	0.788201	203.988	2474.43	671.136	0.307945	0.282618	0.508012	0.38734	0.443244	0.453301
	139.921	0.774482	378.015	2788.16	898.408	53.6885	0.781469	157.322	2112.92	564.599	0.305845	0.290651	0.500904	0.388807	0.482992	0.454503
	92.9071	0.812476	358.682	2658.44	769.603	44.6857	0.780802	162.19	2013.62	557.196	0.319529	0.241291	0.559886	0.368524	0.488494	0.458588
	147.119	0.818333	367.276	2809.73	799.139	46.5021	0.783207	160.308	2025.51	546.486	0.253826	0.235024	0.540469	0.370552	0.481886	0.454517
	110.242	0.796006	332.763	2440.44	744.886	43.8208	0.797152	150.813	2085.86	528.474	0.293209	0.258244	0.537575	0.376504	0.483069	0.450301
	144.873	0.807412	349.364	2841.3	810.026	55.1265	0.800121	159.668	2144.88	538.46	0.288357	0.242513	0.526331	0.375023	0.492798	0.450612
	133.798	0.83459	333.894	2646.98	705.847	50.266	0.767634	175.415	2028.06	575.197	0.274234	0.216093	0.568947	0.360186	0.464518	0.452354
	123.865	0.789997	354.085	2501.89	787.598	55.0355	0.785502	148.902	2019.47	534.09	0.311867	0.269287	0.54241	0.380904	0.487118	0.4582
	94.0056	0.813347	337.502	2751.67	767.092	40.3611	0.794215	116.999	1896.97	470.953	0.308902	0.236981	0.536395	0.370816	0.457982	0.458702
	83.9824	0.789157	342.763	2504.74	785.718	38.7181	0.796092	164.916	2092.99	546.436	0.316437	0.266455	0.533932	0.380534	0.48626	0.447423
	91.6691	0.790847	366.532	2827.66	851.609	46.9485	0.810713	132.472	1833.49	440.867	0.338648	0.259752	0.516366	0.379714	0.515086	0.44084
	128.691	0.806359	370.63	2532.87	769.7	46.5585	0.801928	140.205	2128.66	514.198	0.270822	0.244135	0.557348	0.371386	0.468729	0.451281
	60.8389	0.773934	355.027	2613.37	829.953	36.2464	0.821095	146.718	2039.27	469.063	0.385502	0.275296	0.515602	0.384883	0.519656	0.44407
	104.581	0.799166	367.091	2618.88	806.019	53.2667	0.814616	156.076	2029.27	493.858	0.328371	0.247238	0.545555	0.377102	0.506706	0.442579
	180.945	0.816657	353.78	2692.68	774.218	48.7528	0.783232	162.11	2087.63	561.423	0.219587	0.236917	0.547127	0.371071	0.48782	0.454926
	68.7029	0.790137	355.041	2579.92	794.409	33.9783	0.809903	172.706	2290.07	553.917	0.328498	0.260117	0.541894	0.378794	0.509459	0.444928
	74.5	0.791345	320.652	2492.75	755.292	37.1111	0.806013	158.451	2066.18	517.334	0.335248	0.258273	0.539835	0.380194	0.524367	0.444016
	85.9412	0.798191	346.632	2640.37	783.716	39.1103	0.796757	172.272	2105.55	549.202	0.309155	0.255386	0.543502	0.373566	0.491842	0.448589
	102.91	0.809098	386.237	2919.93	841.005	39.7241	0.790844	153.34	2181.59	560.999	0.285569	0.242371	0.526018	0.375617	0.476601	0.457177
	125.469	0.80463	365.532	2614.98	784.071	39.9453	0.802864	160.81	2114.73	530.604	0.251656	0.244115	0.563775	0.371849	0.494515	0.447457
	135.636	0.81082	367.362	2612.11	779.71	41.6182	0.771847	134.204	1901.58	513.178	0.238227	0.247208	0.557517	0.373554	0.503874	0.454114
	140.877	0.783726	355.545	2741.32	861.207	47.0123	0.794094	146.623	2003.93	513.693	0.255236	0.274163	0.508841	0.385401	0.486465	0.449248
	67.5038	0.762672	304.591	2355.14	762.283	80.374	0.790628	184.921	2080.15	557.417	0.500633	0.301313	0.526646	0.388391	0.523395	0.443735
	151.058	0.783946	346.602	2366.03	756.135	48.4466	0.744477	191.747	1886.52	596.099	0.244335	0.290845	0.560912	0.373772	0.501691	0.445721
	86.1299	0.816642	396.487	2950.21	840.514	38.8386	0.787883	175.551	2134.64	568.991	0.318879	0.23445	0.547311	0.368429	0.477781	0.45125
	121.537	0.800123	360.023	2620.27	800.086	31.463	0.82257	137.98	2201.36	491.399	0.220464	0.244119	0.549644	0.375642	0.476367	0.448533
	101.656	0.798276	420.317	3227.1	960.633	43.5846	0.808703	166.206	2212.77	530.18	0.29863	0.252261	0.502295	0.380776	0.484505	0.441239
	136.996	0.802791	366.754	2713.33	807.282	42.5669	0.806426	149.049	2167.92	518.122	0.249266	0.245959	0.53114	0.374602	0.492635	0.448839
	91.1286	0.799814	378.539	2620.99	787.312	33.4429	0.787978	143.67	2025.1	529.259	0.286997	0.256111	0.55486	0.370896	0.49833	0.452421
	75.4538	0.799112	351.611	2633.64	790.68	91.3538	0.773873	179.077	1821.05	541.372	0.510066	0.260499	0.542078	0.3788	0.5448	0.447319
	72.1729	0.788606	345.467	2614	775.463	38.5639	0.839786	145.662	2055.77	439.333	0.346437	0.25259	0.543071	0.375167	0.522699	0.43023
	95.7341	0.798655	400.306	2928.33	870.15	28.9711	0.81815	105.968	2110.28	446.538	0.305793	0.247506	0.531133	0.375943	0.483663	0.451075
	121.89	0.813298	380.739	2853.21	823.551	33.2286	0.80066	167.929	2119.31	531.125	0.233804	0.234626	0.541406	0.373074	0.48961	0.446421
	63.0621	0.762749	368.724	2619.38	867.897	34.069	0.789447	177.83	1979.97	529.865	0.347424	0.303971	0.515106	0.392279	0.521582	0.444502
	54.68	0.797837	343.602	2473.96	749.211	68.41	0.806651	178.474	1770.23	473.838	0.492879	0.251091	0.582455	0.376157	0.588152	0.428109
	49.1803	0.806932	350.601	2745.08	770.629	38.1717	0.822576	164.575	2174.57	500.775	0.395013	0.235787	0.555734	0.367049	0.539616	0.437324
	113.765	0.810352	376.453	2883.91	821.097	33.5294	0.796935	169.243	2046.81	522.291	0.234312	0.241663	0.547008	0.368772	0.496959	0.443424
	52.5714	0.811387	344.43	2936.93	778.061	23.0075	0.811971	129.61	1972.02	448.399	0.357965	0.237587	0.52505	0.367071	0.461343	0.44622
	66.8319	0.78902	379.603	2793.7	871.568	19.1947	0.823428	120.655	1976.12	418.266	0.231057	0.259481	0.522308	0.383071	0.50411	0.437707
	92.0508	0.817431	393.881	2826.56	814.227	27.0339	0.80774	194.117	2189.47	545.136	0.23358	0.228511	0.546151	0.369083	0.523969	0.436833
	76.2716	0.764623	386.634	2880.12	926.691	19.8333	0.83589	178.608	2354.8	517.198	0.2187	0.282574	0.503004	0.387501	0.479459	0.437511
test_2022_05_05_15_11	141.674	0.803124	375.19	2689	817.627	64.8605	0.754935	168.308	2006.15	610.285	0.321126	0.261956	0.547815	0.375825	0.506575	0.420627
test_2022_05_05_15_13	149.566	0.795739	369.388	2755.93	845.455	75.0921	0.760666	185.62	2279.58	676.452	0.34721	0.270347	0.534138	0.381415	0.48715	0.427133
	154.924	0.789059	364.812	2560	808.391	77.4822	0.751798	192.52	2330.09	708.129	0.341528	0.281358	0.536517	0.378817	0.46497	0.427571
	145.941	0.813632	381.595	2882.47	836.044	77.1987	0.764528	183.716	2358.29	678.888	0.355466	0.245042	0.554676	0.371608	0.474703	0.424789
	185.015	0.834836	368.454	2721.64	747.615	74.9552	0.717891	217.061	2145.81	739.916	0.298211	0.232576	0.587523	0.3595	0.485013	0.432444
	144.43	0.802279	382.938	2755.35	835.821	65.7068	0.768754	174.066	2209.4	623.436	0.31466	0.258896	0.543837	0.376726	0.504942	0.418358
	113.61	0.814477	346.841	2520.31	729.18	52.7458	0.783271	144.961	2371.83	603.098	0.330197	0.238693	0.584736	0.365457	0.46058	0.425121
	109.871	0.817015	304.335	2279	648.035	75.2518	0.770771	191.39	2347.33	664.678	0.402479	0.237826	0.583619	0.362256	0.506088	0.420075
	145.604	0.827303	358.367	2720.19	752.178	73.5899	0.729227	224.259	2213.14	743.028	0.336747	0.23865	0.562964	0.365839	0.491895	0.426895
	134.93	0.812322	372.628	2605.84	773.73	65	0.785802	183.018	2443.83	652.401	0.336685	0.239612	0.559155	0.370159	0.485133	0.418093
	125.003	0.814427	346.637	2545.16	739.067	67.4848	0.766131	192.694	2160.51	641.234	0.369172	0.24352	0.565913	0.369003	0.501113	0.419786
	117.304	0.802702	364.413	2802.21	826.313	62.8528	0.775369	160.703	2272.11	621.515	0.353737	0.256997	0.540413	0.375138	0.489205	0.426764
	135.318	0.826726	379.608	2751.11	779.464	59.178	0.772268	178.562	2351.8	660.575	0.315523	0.224774	0.574854	0.365067	0.48463	0.424951
	130.706	0.791826	382.306	2778.17	868.674	67.7262	0.773934	180.717	2271.25	631.146	0.342834	0.271978	0.527778	0.381642	0.505602	0.419162
	110.088	0.824571	409.193	3092.78	869.399	57.0392	0.7726	181.533	2182.13	617.039	0.349923	0.227791	0.537802	0.36896	0.5019	0.418377
	121.045	0.803904	386.668	2898.5	857.408	60.3091	0.804081	166.064	2292.52	568.064	0.353093	0.244228	0.528839	0.37648	0.500347	0.410121
	108.837	0.810752	386.007	2628.23	787.485	70.1395	0.79688	172.668	2106.41	561.826	0.393292	0.237228	0.559267	0.371445	0.535115	0.411228
	101.709	0.778272	341.449	2394.72	746.027	50.1654	0.785694	168.235	2160.13	572.892	0.33479	0.284042	0.557922	0.369544	0.515551	0.411846
	139.275	0.791195	402.914	2901.93	897.031	57.302	0.796845	177.573	2292.52	591.087	0.307494	0.263	0.519463	0.380896	0.509574	0.411034
	139.252	0.781345	342.707	2657.43	829.362	66.5657	0.768957	194.485	2101.45	614.214	0.336039	0.285371	0.529502	0.386697	0.517293	0.412857
	95.6683	0.775604	345.156	2694.39	832.342	47.8585	0.814388	153.951	2293.16	537.697	0.413669	0.276205	0.530302	0.386342	0.491276	0.410078
	142.678	0.829713	368.402	2941.73	789.96	50.1287	0.76723	190.829	2378.04	680.741	0.274311	0.221825	0.558715	0.361897	0.481804	0.422779
	126.448	0.81528	408.536	3106.03	875.027	42.7	0.797956	172.055	2236.02	580.051	0.267747	0.232694	0.533387	0.368532	0.510462	0.413443
	129.938	0.830876	426.462	2919.28	830.217	55.0247	0.768857	165.96	2090.69	588.94	0.308837	0.22281	0.560208	0.366983	0.539899	0.419247
	160.153	0.80813	351.178	2518.38	757.438	61.9144	0.786084	183.188	2077.9	573.207	0.280911	0.245181	0.559364	0.372639	0.536489	0.406777
	145.816	0.744389	408.624	2835.39	1014.18	61.6276	0.77696	167.824	2229.69	619.716	0.316067	0.33021	0.481139	0.399877	0.496727	0.423242
	118.382	0.807442	342.614	2751.27	791.577	61.0636	0.789183	180.537	2209.18	596.883	0.34787	0.24538	0.528705	0.376115	0.528093	0.413009
	140.376	0.814091	402.771	2873.73	841.808	52.9274	0.778968	194.432	2326.84	646.017	0.285679	0.239639	0.561212	0.371069	0.513101	0.416784
	153.257	0.83948	382.874	2738.61	752.821	53.1667	0.787496	189.063	2368.17	611.743	0.259243	0.206245	0.590187	0.357928	0.502578	0.409434
	150.026	0.806731	377.866	2762.75	822.33	51.9592	0.802828	153.118	2160.11	522.661	0.265392	0.241929	0.556559	0.371202	0.527354	0.408561
	121.451	0.824219	390.378	2981.86	825.503	43.4514	0.803348	176.486	2452.34	601.803	0.269225	0.220927	0.554899	0.369334	0.522745	0.40852
	100.083	0.826623	399.436	2988.2	819.668	49.9352	0.803751	184.427	2207.34	566.031	0.333216	0.21682	0.560744	0.364506	0.541963	0.40315
	93.5613	0.799793	413.3	3024.73	918.614	51.5355	0.820475	223.716	2522.81	617.203	0.360445	0.244646	0.511765	0.379076	0.546976	0.393292
	104.046	0.824876	407.831	3114.25	849.256	49.1944	0.780518	205.692	2350.24	655.97	0.322039	0.226792	0.552549	0.36531	0.525572	0.412773
	88.9403	0.795914	381.615	2983.41	877.846	41.694	0.803433	235.279	2606.45	679.855	0.323831	0.254835	0.511828	0.376649	0.52685	0.401722
	73.8442	0.821632	468.326	3441.1	949.237	25.6594	0.82572	156.145	2379.56	517.173	0.261188	0.216865	0.538688	0.372189	0.512073	0.401708
	94.1347	0.810127	433.573	3245.09	944.045	34.0104	0.78331	210.907	2401.36	635.997	0.263155	0.243404	0.526175	0.374122	0.53224	0.404349
	60.4891	0.814823	447.24	3104.79	898.169	26.2774	0.8121	238.096	2393.27	611.814	0.304721	0.228104	0.563536	0.371078	0.562755	0.398216
test_2022_05_05_15_15	136.611	0.796116	387.002	2883.11	874.485	71.1872	0.729827	269.3	2670.89	893.477	0.35585	0.282673	0.516975	0.38125	0.460229	0.426937
test_2022_05_05_15_17	139.134	0.807356	371.756	2768.04	808.604	67.7586	0.734817	260.815	2651.02	870.676	0.335292	0.263409	0.54488	0.373418	0.468106	0.428286
	142.743	0.816599	353.555	2643.6	760.491	68.332	0.754954	258.311	2536.26	795.482	0.328703	0.243978	0.556042	0.368238	0.495613	0.420108
	164.668	0.805926	322.329	2515.15	737.003	70.9561	0.734651	247.442	2613.92	852.056	0.315089	0.266578	0.556227	0.373085	0.464195	0.424414
	113.273	0.79883	359.623	2619.6	787.041	69.5134	0.738268	264.258	2407.04	801.253	0.385959	0.275123	0.552798	0.375394	0.496294	0.421165
	176.99	0.759038	387.484	2998.59	986.167	73.699	0.768401	265.142	2723.53	818.195	0.318303	0.315159	0.47121	0.396558	0.480998	0.414277
	142.24	0.831573	375.672	2816.14	774.562	68.6202	0.74916	226.712	2369.56	750.195	0.334939	0.22607	0.571758	0.363081	0.497947	0.42334
	145.023	0.789937	352.938	2571.08	793.944	78.6396	0.741627	256.009	2562.34	827.381	0.359	0.286712	0.537811	0.378977	0.487498	0.420653
	106.156	0.788679	383.923	2864.99	885.58	72.324	0.767906	269.837	2548.84	776.428	0.405302	0.277029	0.502618	0.386039	0.508005	0.412627
	95.4424	0.795876	362.125	3065.51	889.336	55.1697	0.736185	227.97	2367.59	765.056	0.379807	0.279356	0.501352	0.380059	0.499723	0.422394
	123.014	0.779371	413.122	3131.87	970.739	59.1528	0.742103	205.403	2517.6	781.53	0.349504	0.299136	0.486325	0.385093	0.456267	0.430616
	113.851	0.803969	427.016	2951.97	896.51	55.8119	0.745295	278.526	2613.01	843.452	0.337746	0.265166	0.53379	0.376745	0.479387	0.419544
	97.0242	0.806006	339.894	2570.4	752.019	87.0364	0.772248	223.437	2442.07	710.748	0.460525	0.252766	0.545776	0.37389	0.50816	0.413078
	114.262	0.822527	353.029	2835.29	785.797	54.1262	0.778512	208.788	2525.08	694.166	0.338554	0.231571	0.532643	0.371209	0.497995	0.418265
	60.5221	0.771827	315.214	2672.93	817.983	165.593	0.782411	222.393	2374.92	683.852	0.690151	0.292203	0.497313	0.391401	0.528628	0.411797
	130.369	0.802935	361.785	2580.04	771.174	53.8	0.764071	274.722	2621.25	802.881	0.305769	0.259815	0.539594	0.371044	0.503712	0.416385
	108.05	0.812762	377.558	2790.85	802.904	55.0302	0.767514	209.795	2485.32	720.196	0.34035	0.244155	0.552557	0.369398	0.490875	0.420927
	127.965	0.820613	373.2	2670.19	759.868	56.0116	0.77274	217.998	2401.18	692.821	0.318923	0.235007	0.565862	0.365126	0.518797	0.412779
	124.535	0.800709	392.998	2791.28	851.817	62.586	0.761024	237.025	2559.72	766.502	0.33886	0.265164	0.542808	0.376836	0.495736	0.420323
	128.543	0.804603	359.177	2706.46	797.242	56.4096	0.768915	230.438	2537.24	740.807	0.311808	0.256501	0.548382	0.373681	0.510558	0.416226
	120.196	0.79066	341.953	2633.13	796.515	46.9148	0.758768	255.856	2632.6	800.558	0.294786	0.27671	0.537133	0.379422	0.477363	0.419614
	130.961	0.802279	390.55	2877.8	864.316	53.6	0.773479	256.195	2507.72	748.095	0.296121	0.258696	0.534665	0.37856	0.529384	0.411251
	161.444	0.82869	376.46	2937.54	800.381	47.2284	0.748823	274.519	2481.03	804.944	0.229786	0.229396	0.542248	0.365226	0.510448	0.418617
	113.069	0.804761	387.804	2795.93	829.894	56.5586	0.774597	220.726	2588.64	732.588	0.333339	0.253102	0.544605	0.373469	0.492705	0.417545
	112.429	0.796121	371.276	2753.69	837.429	55.631	0.770052	181.669	2268.84	647.311	0.343431	0.266126	0.533337	0.377932	0.505364	0.42126
	98.5294	0.779832	339.63	2610.99	810.457	32.5588	0.767864	207.27	2631.83	733.436	0.262992	0.288158	0.545039	0.381408	0.467268	0.415032
	121.567	0.782937	402.861	2911.88	923.218	58.8046	0.759482	233.061	2422.28	727.155	0.332599	0.289177	0.505386	0.386227	0.509142	0.413059
	115.633	0.810233	372.973	2812.87	814.342	37.9568	0.778062	261.661	2800.45	788.996	0.25414	0.246192	0.535697	0.370075	0.488492	0.412968
	102.082	0.809205	389.069	3019.21	851.4	38.6667	0.765913	234.414	2354.75	705.823	0.283195	0.25212	0.537789	0.370751	0.521301	0.413712
	123.517	0.826625	372.167	2810.96	788.588	42.5603	0.755825	229.736	2398.05	707.845	0.258001	0.232047	0.562346	0.366301	0.506927	0.412651
	116.631	0.786864	374.883	2658.41	831.325	44.9881	0.767909	228.169	2414.82	711.789	0.291064	0.279456	0.55207	0.377167	0.505464	0.413729
	136.28	0.773443	397.087	2677.76	884.003	47.1585	0.7348	264.135	2361.37	781.647	0.270532	0.314151	0.516296	0.383619	0.52694	0.419237
	121.833	0.80814	388.366	2896.25	853.537	44.9565	0.782008	232.347	2720.55	721.616	0.274287	0.24895	0.532292	0.375048	0.507388	0.406173
	111.28	0.813504	386.798	2992.26	852.731	44.208	0.756999	232.567	2424.95	721.116	0.287922	0.247532	0.549701	0.37286	0.519705	0.41657
	111.439	0.800974	392.887	3064.97	905.019	36.0976	0.772386	226.3	2526.54	719.187	0.263187	0.257931	0.5122	0.377733	0.488686	0.416025
	115.144	0.796362	386.194	2892.38	857.532	40.0072	0.776769	271.705	2690.02	763.898	0.269812	0.267275	0.534566	0.374688	0.515679	0.406502
	107.577	0.816305	403.862	3303.61	926.179	38.7387	0.797588	204.003	2684.53	677.962	0.268689	0.230979	0.516923	0.374221	0.495405	0.40638
	102.033	0.8099	417.342	2892.09	863.385	34.6524	0.79033	234.372	2729.95	735.445	0.264992	0.242574	0.546954	0.372455	0.4866	0.411345
	140.612	0.81321	374.738	2657.86	781.969	42.0969	0.781087	233.985	2633.23	736.962	0.242788	0.240067	0.561944	0.369514	0.504507	0.411397
	83.7549	0.809931	363.046	2811.51	790.972	39.0098	0.766592	284.359	2338.54	724.767	0.346788	0.250878	0.537261	0.36875	0.520166	0.404086
	94.4809	0.784362	363.19	2819.25	855.037	34.4363	0.779366	209.347	2470.7	660.265	0.31763	0.27912	0.522143	0.381547	0.497887	0.411247
	94.9553	0.803779	395.999	2881.2	864.185	37.5935	0.801767	247.138	2589.96	675.773	0.296847	0.247137	0.530649	0.37726	0.516289	0.396859
	92.8333	0.785745	396.77	2825.41	883.305	39.8434	0.795206	236.857	2598.05	696.488	0.309252	0.27119	0.521614	0.383049	0.523486	0.40424
	108.166	0.777313	366.192	2591.51	838.546	33.4623	0.783551	240.392	2629	705.661	0.243849	0.287725	0.54523	0.381933	0.503403	0.403711
	60.9223	0.788098	534.913	3619.4	1143.12	30.3107	0.773559	240.52	2336.76	665.254	0.327278	0.274908	0.477334	0.387719	0.540326	0.406129
	73.7111	0.836297	389.738	3271.77	850.022	24.2556	0.794268	206.556	2575.68	654.566	0.260059	0.208043	0.532141	0.362646	0.489498	0.407805
	98.1278	0.786397	385.418	2788.12	873.343	29.812	0.799879	234.844	2698.51	712.182	0.241422	0.269727	0.543187	0.378779	0.497562	0.412043
	78.2873	0.779205	396.596	2833.96	896.551	37.7687	0.784981	254.707	2577.76	715.877	0.32914	0.282497	0.51891	0.382536	0.532992	0.405873
	121.876	0.837597	432.704	3445.12	906.425	45.7988	0.769242	254.424	2384.68	700.763	0.279556	0.215859	0.529155	0.362136	0.53669	0.406776
	78.4108	0.82465	422.179	2977.64	844.428	30.9838	0.778047	242.728	2619.9	740.241	0.289147	0.227862	0.567126	0.366226	0.499148	0.410669
	81.4824	0.801481	429.668	2883.04	869.866	36.6353	0.763058	210.04	1943.15	597.291	0.312445	0.264098	0.554003	0.374408	0.554444	0.403349
	100.685	0.778859	431.308	2865.54	943.737	36.4831	0.736829	279.771	2276.95	768.374	0.270871	0.300383	0.511452	0.388721	0.550315	0.413769
	75.8806	0.80705	411.907	3037.01	884.229	35.9627	0.801302	261.599	2758.49	740.93	0.321691	0.244174	0.54978	0.373491	0.528196	0.404182
	83.1848	0.761859	416.672	2965.58	974.312	34.4891	0.771791	252.58	2452.87	717.046	0.299194	0.310818	0.491902	0.391184	0.526722	0.41093
	64.3098	0.805875	428.313	3306.05	958.527	34.9783	0.788137	253.161	2449.33	697.869	0.359821	0.247957	0.515458	0.379557	0.54993	0.404121
	83.3563	0.787328	390.405	3137.53	935.378	28.6375	0.804863	240.834	2719.98	692.717	0.264216	0.266008	0.49985	0.382743	0.525601	0.401808
	73.6847	0.770246	372.143	2715.96	873.289	33.5405	0.769878	276.878	2394.38	739.509	0.313948	0.301598	0.518137	0.380528	0.555869	0.409302
	61.874	0.77293	398.808	3310.45	1013.89	23.8346	0.767942	216.827	2249.43	654.873	0.285356	0.300098	0.47111	0.389736	0.534917	0.410293
	80.3786	0.825512	460.804	3391.77	949.665	31.2621	0.798211	275.823	2846.58	772.799	0.278946	0.21881	0.540286	0.368307	0.523097	0.40562
	65.1055	0.779315	416.881	3077.24	956.511	42.5046	0.793266	292.603	2581.55	734.25	0.380786	0.280382	0.505182	0.387203	0.550705	0.399646
	70.4974	0.808698	410.143	2893.31	851.435	22.8359	0.806851	245.156	2659.51	671.108	0.246614	0.240442	0.558772	0.370927	0.534917	0.39954
	69.6949	0.827591	433.23	3095.13	872.825	22.9068	0.774874	275.277	2604.97	738.657	0.249013	0.227136	0.57673	0.367992	0.529605	0.40745
	66.3922	0.819819	450.875	3061.15	898.524	20.8431	0.797685	204.85	2298.07	588.141	0.248556	0.228935	0.574029	0.371349	0.530888	0.401412
	57.6107	0.801634	509.934	3934.5	1073.84	23.4107	0.797499	253.403	2601.03	668.06	0.288977	0.252807	0.505385	0.381628	0.544372	0.395009
	61.9942	0.817872	412.772	3035.98	873.824	23.4826	0.80373	217.619	2467.3	629.965	0.27549	0.229162	0.55426	0.371428	0.541896	0.403508
	64.113	0.807706	492.198	3950.77	1119.44	24.5774	0.801685	260.249	2545.14	675.542	0.279792	0.240436	0.475294	0.377164	0.558449	0.397644
	68.8889	0.792635	423.661	3548.27	1006.34	21.9028	0.785144	251.436	2492.24	693.534	0.243621	0.269801	0.495577	0.378522	0.560686	0.404986
	44.2952	0.815792	434.26	3043.42	862.855	36.6265	0.812371	280.111	2435.07	655.043	0.426969	0.22849	0.567417	0.366628	0.594908	0.388662
	52.3768	0.749578	471.184	3201.2	1094.1	22.6377	0.785528	221.148	2333.71	635.433	0.308029	0.324246	0.479686	0.399135	0.570284	0.403779
test_2022_05_05_15_19	120.709	0.815751	315.701	2683.07	731.654	131.179	0.760178	183.788	2142.1	643.825	0.514398	0.243904	0.528343	0.372795	0.502376	0.423304
test_2022_05_05_15_21	131.541	0.774286	344.544	2535.5	823.141	112.096	0.745316	201.06	2360.19	734.178	0.466642	0.30432	0.515481	0.390026	0.476555	0.430389
	136.432	0.81196	325.391	2356.15	691.132	83.3668	0.751254	177.342	2250.45	678.742	0.38686	0.251599	0.575564	0.366482	0.473028	0.430825
	130.855	0.803959	287.057	2246.09	658.412	89.5108	0.771268	179.78	2088.05	604.071	0.414292	0.255571	0.554707	0.375039	0.512551	0.418546
	95.6306	0.801495	291.244	2419.3	702.459	71.4968	0.747591	206.792	2232.73	698.309	0.440541	0.267459	0.529925	0.379842	0.502532	0.422382
	125.338	0.789248	356.496	2655.64	824.285	93.3414	0.76021	205.908	2338.35	708.294	0.428924	0.278353	0.521373	0.382148	0.488293	0.425953
	131.743	0.819381	318.763	2385.62	678.295	74.306	0.729096	214.291	2316.35	743.834	0.366265	0.252678	0.575039	0.364794	0.48003	0.429455
	127.508	0.823366	325.792	2396.23	670.207	53.8182	0.74604	214.549	2502.92	769.753	0.311773	0.24042	0.590846	0.356799	0.469232	0.431057
	115.711	0.807936	306.062	2367.37	677.504	79.9644	0.761162	208.814	2295.98	695.069	0.420436	0.252908	0.558852	0.368273	0.495511	0.420475
	86.9293	0.79771	329.397	2641.05	777.722	63.583	0.754539	190.297	2352.35	699.687	0.430675	0.269702	0.531837	0.37925	0.481002	0.430714
	119.963	0.796998	322.103	2370.61	716.144	61.7433	0.745637	198.91	2412.66	741.645	0.357383	0.275037	0.569278	0.370377	0.459926	0.434502
	96.3118	0.775993	299.402	2701.68	799.501	64.0647	0.770106	176.556	2471.48	691.436	0.44624	0.291408	0.497083	0.389273	0.44303	0.428186
	121.844	0.791097	318.604	2492.08	759.025	60.4682	0.764059	219.159	2554.7	751.459	0.340448	0.275017	0.528106	0.38333	0.487013	0.424421
	126.069	0.765653	294.053	2297.33	736.404	72.7176	0.710908	231.888	2287.95	793.862	0.375324	0.333583	0.521727	0.386956	0.478703	0.430431
	99.9753	0.789679	363.281	2655.45	828.803	52.5926	0.780816	153.876	2520.29	658.859	0.3606	0.270895	0.538555	0.379106	0.449396	0.425499
	133.067	0.793495	293.232	2228.36	679.072	75.6726	0.75932	178.313	2267.82	668.282	0.37522	0.273284	0.550801	0.376443	0.491398	0.426367
	179.744	0.822105	299.785	2197.9	628.599	68.8049	0.764931	226.808	2539.95	748.139	0.279493	0.235506	0.599002	0.360324	0.490493	0.418894
	69.875	0.751539	312.553	2397.35	784.404	62.6397	0.795784	175.328	2733.66	677.842	0.522966	0.313949	0.513659	0.389914	0.461005	0.41972
	113.214	0.794297	313.605	2437.92	735.009	59.0175	0.776448	197.48	2291.59	650.965	0.359293	0.26661	0.544564	0.378039	0.502167	0.418829
	140.901	0.80058	302.767	2404.05	710.789	95	0.759808	199.538	2180.71	664.881	0.404498	0.263178	0.557663	0.377801	0.520425	0.419527
	137.177	0.809977	321.448	2565.9	729.341	52.4567	0.779579	180	2389.31	646.727	0.296141	0.244291	0.546885	0.371255	0.468335	0.420592
	116.726	0.799766	292.472	2391.7	688.238	70.7511	0.786983	181.436	2320.71	612.908	0.356187	0.256837	0.567763	0.374108	0.503428	0.411583
	143.96	0.797697	315.611	2264.15	697.833	65.3569	0.773687	175.659	2294.14	642.215	0.320157	0.263272	0.564645	0.374968	0.493229	0.42201
	116.625	0.785969	307.993	2498.49	758.482	62.5312	0.773772	224.717	2386.64	696.456	0.362529	0.27787	0.525892	0.382454	0.498582	0.416642
	112.899	0.833582	347.906	2882.28	749.771	54.8201	0.78447	181.289	2397.5	644.203	0.341183	0.214115	0.548672	0.360758	0.498966	0.420529
	146.034	0.805691	362.513	2761.85	811.121	73.8926	0.789689	172.034	2241.7	597.692	0.342663	0.246466	0.525997	0.375986	0.51963	0.418862
	149.874	0.803443	334.185	2474.61	731.423	61.7323	0.797074	204.291	2284.78	616.793	0.296989	0.248145	0.564152	0.370722	0.506867	0.411706
	92.1675	0.802328	326.132	2544.93	747.654	57.2611	0.804619	225.892	2459.3	638.819	0.385013	0.248022	0.537935	0.377565	0.535333	0.399217
	131.881	0.836259	350.582	2715.53	726.142	49.8847	0.76374	208.95	2423.18	707.791	0.287855	0.215992	0.584251	0.358922	0.48662	0.422085
	104.248	0.771374	364.229	2696.47	865.69	55.1548	0.786038	178.514	2274.4	609.43	0.363748	0.292106	0.507056	0.388182	0.501286	0.415544
	119.675	0.810642	312.816	2531.63	712.861	53.9167	0.791419	173.331	2053.85	556.815	0.325646	0.239827	0.554719	0.370527	0.509596	0.410523
	106.25	0.837816	359.753	2660.4	723.64	43.875	0.758917	221.943	2471.5	720.33	0.296858	0.216767	0.588249	0.355803	0.511361	0.413413
	173.027	0.796062	338.651	2457.29	752.955	56.1755	0.775373	187.205	2280.77	639.948	0.252678	0.263994	0.550824	0.376663	0.492972	0.418828
	101.591	0.803797	361.546	2710.36	810.902	49.4545	0.781296	161.923	2041.07	556.713	0.346656	0.252471	0.537466	0.376241	0.5054	0.413278
	104.009	0.792425	313.989	2471.43	744.193	49.3519	0.784598	165.584	2150.71	569.193	0.325802	0.266394	0.524645	0.379292	0.527765	0.411669
	94.5667	0.779145	340.133	2754.78	849.464	58.4593	0.789988	194.739	2162.99	591.362	0.384733	0.280515	0.497686	0.388986	0.537526	0.406111
	82.0395	0.786487	328.845	2518.71	775.886	56.5439	0.780121	204.394	2230.92	626.571	0.402581	0.275937	0.528245	0.382351	0.539949	0.408836
	134.547	0.829354	323.552	2713.98	717.562	50.8605	0.786218	199.606	2327.3	632.92	0.287966	0.218457	0.547225	0.365557	0.515838	0.411781
	84.7885	0.769951	348.509	2711.08	861.04	55.6346	0.793967	199.718	2372.19	629.127	0.398349	0.291047	0.507545	0.389186	0.506216	0.406426
	104.824	0.794444	330.256	2601.51	783.061	50.024	0.787159	191.814	2315.23	626.41	0.32773	0.261574	0.53679	0.380049	0.518413	0.4109
	133.109	0.791097	409.31	3016.45	924.201	51.9703	0.791627	160.287	2189.36	562.709	0.292293	0.265421	0.517769	0.381254	0.52662	0.410082
	78.0101	0.769248	356.251	2660.24	863.672	42.1515	0.805108	188.94	2420.47	604.832	0.358601	0.287553	0.503058	0.390662	0.520898	0.405065
	92.567	0.79497	377.284	2799.16	850.568	37.1992	0.789885	187.293	2395	621.691	0.299949	0.2609	0.525581	0.379066	0.50045	0.416046
	104.14	0.791278	328.864	2449.33	747.215	47.4815	0.790662	189.108	2289.6	610.686	0.318516	0.265447	0.551816	0.376865	0.52125	0.413317
	73.1389	0.809726	355.137	2667.71	772.114	34.0625	0.811942	155.043	2288.44	543.132	0.322299	0.236102	0.551879	0.371812	0.517503	0.414896
	91.1881	0.789791	333.583	2578.39	784.479	51.344	0.79381	191.67	2179.24	583.802	0.359846	0.266103	0.529362	0.382097	0.547453	0.40592
	72.3542	0.787856	339.31	2844.46	835.532	38.7431	0.79924	146.218	2168.24	534.955	0.357548	0.267882	0.507393	0.382369	0.520854	0.415974
	85.953	0.807242	357.981	2752.1	808	30.4027	0.787088	193.37	2319.87	624.658	0.278638	0.247285	0.554131	0.371509	0.531165	0.412933
	85.8161	0.781352	325.274	2416.09	764.72	40.2414	0.766566	196.328	2172.72	623.983	0.319045	0.285792	0.542629	0.377784	0.530174	0.416612
	74.9789	0.782356	358.824	2761.88	838.323	45.1972	0.782889	176.547	2056.77	558.649	0.370236	0.278707	0.527365	0.380226	0.557072	0.404856
	76.4279	0.802798	390.552	3216.48	917.265	47.4977	0.784696	185.742	2192.17	598.809	0.388634	0.252026	0.499817	0.380196	0.537217	0.412675
	116.634	0.748643	385.359	2609.47	912.094	56.7068	0.802716	190.829	2143.38	563.899	0.336333	0.314269	0.512948	0.393958	0.551703	0.402626
	83.4754	0.783955	364.728	2894.6	879.318	44.9959	0.791849	196.599	2450.62	645.937	0.344865	0.271859	0.519129	0.383389	0.498645	0.412355
	97.0269	0.801868	442.741	3300.31	973.276	53.7634	0.812295	207.483	2374.88	586.817	0.352204	0.245194	0.498906	0.378201	0.557086	0.394605
	87.9224	0.81426	382.967	2747.45	798.291	40.2328	0.800604	203.159	2293.92	598.283	0.314293	0.232228	0.556814	0.370174	0.543929	0.40121
	77.9724	0.81857	353.851	2692.34	749.319	28.765	0.786341	192.29	2342.4	618.225	0.280672	0.233171	0.571215	0.364481	0.526897	0.410099
	103.518	0.840534	374.568	2717.16	731.98	28.223	0.817813	168.06	2502.49	565.382	0.218115	0.19624	0.593477	0.35464	0.51844	0.404318
	80.0879	0.824974	383.765	2905.77	792.567	26.9341	0.800058	167.84	2299.66	561.534	0.256618	0.220607	0.556691	0.364414	0.515643	0.408207
	67.6696	0.771512	398.157	2973.62	946.457	52.4375	0.783816	203.635	2266.38	633.907	0.437393	0.29215	0.508455	0.38839	0.546195	0.412297
	68.7278	0.794929	434.668	3291.06	967.922	33.5148	0.789151	200.52	2311.47	618.556	0.32944	0.260831	0.510062	0.376859	0.522597	0.410457
	62.8553	0.812939	366.346	2828.45	799.447	23.3396	0.828154	181.205	2551.81	560.363	0.273757	0.226388	0.569128	0.369306	0.513426	0.3971
	81.3056	0.79898	365.877	2779.47	820.391	32.4881	0.791773	194.418	2268.81	595.273	0.288987	0.256714	0.540085	0.373856	0.549734	0.401993
	57.96	0.804277	396.992	2862.8	863.373	24.2229	0.812485	174.107	2290.73	540.687	0.295064	0.242265	0.547129	0.378484	0.529193	0.400786
	48.8986	0.834476	357.007	2687.48	707.162	19.25	0.815408	174.114	2132.2	520.665	0.2834	0.204121	0.597385	0.353265	0.566271	0.400203
	58.8935	0.795318	413.689	3060.52	920.779	25.5444	0.785981	232.011	2213.12	612.82	0.300076	0.263627	0.512584	0.381425	0.565418	0.39896
	54.1546	0.794276	409.654	3080.12	922.655	27.265	0.804944	205.022	2091.46	533.766	0.336748	0.257009	0.511988	0.38208	0.579493	0.387355
	48.2913	0.797858	365.338	2952.59	829.96	22.7718	0.830257	183.199	2239.98	517.765	0.319698	0.243928	0.529724	0.373252	0.5718	0.394912
	47.8017	0.782374	385.466	2766.1	836.75	21.1897	0.797223	230.44	2202.06	593.455	0.309219	0.278163	0.540821	0.372311	0.55742	0.391641
test_2022_05_05_15_31	202.879	0.779661	318.472	2242.77	730.498	82.6727	0.729989	212.476	2728.97	882.146	0.293181	0.303794	0.541582	0.383931	0.436907	0.466564
test_2022_05_05_15_34	202.503	0.776119	362.785	2694.98	871.321	83.2721	0.722217	225.23	2626.96	882.215	0.297435	0.311232	0.513476	0.386987	0.448358	0.469639
	202.226	0.811882	327.425	2363.99	695.779	82.8045	0.711373	221.997	2738.16	942.023	0.297402	0.265209	0.574134	0.367606	0.439686	0.475646
	189.981	0.804171	306.302	2197.95	665.266	67.8403	0.726689	237.234	2680.31	898.459	0.273729	0.269605	0.576877	0.368532	0.456776	0.468417
	225.667	0.789268	361.86	2533.44	803.979	105.77	0.712654	230.868	2762.14	952.352	0.326334	0.29637	0.531404	0.382224	0.42374	0.470613
	240.205	0.78808	366.465	2546.78	821.146	77.8869	0.709908	249.295	2801.34	981.948	0.255532	0.300389	0.543573	0.382559	0.426802	0.47426
	264.615	0.805517	348.538	2618.18	785.872	93.7523	0.690276	240.826	2708.86	1000.45	0.267763	0.282525	0.538262	0.37908	0.429807	0.478039
	201.286	0.787599	326.474	2516.36	781.735	81.698	0.725442	236.942	2746.98	917.963	0.299168	0.293822	0.531015	0.384152	0.444694	0.468213
	234.132	0.804383	334.643	2432.65	736.825	83.2883	0.704766	219.275	2753.41	961.749	0.267926	0.280026	0.551142	0.37486	0.426868	0.476144
	223.386	0.801596	354.88	2563.39	786.501	82.8842	0.705411	241.237	2793.07	985.194	0.275673	0.28262	0.540694	0.378451	0.422295	0.472519
	230.783	0.804742	375.017	2581.84	798.691	86.3396	0.727701	235.916	2797.44	929.476	0.285259	0.269148	0.555429	0.375232	0.436693	0.468344
	234.76	0.798785	390.597	2796.58	864.777	78.7733	0.710497	255.626	2826.91	995.241	0.259687	0.284502	0.529941	0.380006	0.430589	0.469377
	213	0.801423	358.753	2638.38	800.538	80.4624	0.703872	232.456	2710.54	961.745	0.280764	0.284869	0.550647	0.377646	0.440894	0.475634
	220.188	0.796713	371.022	2712.94	840.63	78.8864	0.721954	235.178	2761.26	931.92	0.272934	0.282935	0.529323	0.381761	0.435847	0.472575
	196.951	0.810967	341.753	2502.39	736.897	54.9783	0.745182	251.502	2775.02	879.732	0.226439	0.254879	0.569444	0.36943	0.453031	0.458832
	223.358	0.802384	361.378	2583.43	789.536	79.7371	0.72967	229.056	2721.9	896.087	0.273248	0.271354	0.551555	0.375569	0.447587	0.464914
	235.31	0.778399	380.875	2556.24	850.115	90.5095	0.723428	258.905	2734.2	939.205	0.289258	0.307022	0.529382	0.387391	0.449777	0.46543
	279.494	0.754556	371.954	2498.27	882.508	90.8556	0.736525	218.38	2712.25	864.955	0.256827	0.33461	0.51713	0.396172	0.450307	0.464589
	307.618	0.782527	361.021	2552.36	824.336	97.7851	0.721094	236.757	2712.73	921.481	0.25499	0.302884	0.529969	0.385299	0.445707	0.466939
	227.056	0.794189	337.38	2664.98	805.231	77.1222	0.698626	249.923	2657.12	969.765	0.259721	0.29504	0.51341	0.383829	0.454116	0.473589
	218.437	0.785127	368.815	2661.04	850.397	92.7586	0.702792	269.177	2632.7	960.542	0.3046	0.308261	0.522854	0.385897	0.459616	0.471876
	244.735	0.784864	389.764	2629.48	860.14	67.4815	0.737303	250.252	2709.63	889.173	0.225374	0.292065	0.5296	0.381989	0.460133	0.462452
	273.064	0.789449	355.585	2562.43	814.317	73.4244	0.723208	273.686	2798.66	966.112	0.214453	0.292015	0.532345	0.38221	0.45016	0.466305
	243.936	0.777484	356.246	2475.49	817.366	74.7376	0.723586	258.22	2825.41	955.451	0.242254	0.308952	0.531476	0.386503	0.431876	0.462987
	212.863	0.78532	364.019	2616.66	840.395	69.3688	0.719046	244.421	2715.4	926.788	0.258823	0.300875	0.529267	0.386894	0.445148	0.467262
	281.831	0.779894	351.234	2496.26	816.254	88.2208	0.71591	255.099	2742.4	955.724	0.24302	0.30876	0.530045	0.385482	0.448703	0.471383
	243.156	0.794648	379.681	2669.96	838.47	88.449	0.72284	243.744	2673.2	905.477	0.274385	0.286639	0.530452	0.380086	0.460431	0.465135
	203.038	0.804837	364.759	2597.38	788.002	64.5634	0.732551	240.744	2749.82	900.591	0.24183	0.26617	0.555425	0.374734	0.446497	0.461721
	242.833	0.793207	374.662	2663.74	843.006	75.9762	0.744645	226.933	2742.09	858.379	0.243467	0.27858	0.5374	0.382547	0.455041	0.46193
	256.15	0.809445	387.169	2638.08	806.087	64.8271	0.762796	234.691	2711.77	811.081	0.210641	0.249972	0.553673	0.373537	0.467166	0.453596
	233.639	0.801399	396.429	2675.55	843.601	63.7349	0.731736	254.314	2819.15	932.418	0.219261	0.273145	0.540045	0.379129	0.448504	0.469247
	213.771	0.803681	370.681	2629.88	809.33	58.2026	0.724344	261.061	2751.8	935.815	0.21961	0.272696	0.551302	0.377291	0.450886	0.469622
	196.695	0.799311	372.194	2626.99	819.208	49.7048	0.763847	205.858	2779.03	806.967	0.212889	0.262401	0.547174	0.37999	0.438943	0.462603
	232.155	0.811518	378.97	2645.15	793.069	56.9914	0.749983	212.9	2527.13	786.068	0.197911	0.252581	0.559153	0.372087	0.488513	0.461265
	227.341	0.811407	352.7	2432.77	735.429	42.5331	0.753284	207.507	2538.67	769.85	0.164525	0.252422	0.5728	0.36938	0.473604	0.462392
	206.913	0.807697	361.933	2811.09	826.838	53.1196	0.777255	165.502	2492.71	672.324	0.20645	0.2484	0.539122	0.376282	0.479354	0.457088
	187.814	0.752283	366.19	2699.62	930.898	48.7048	0.755758	246.497	2648.18	816.178	0.208866	0.330321	0.495439	0.397627	0.481027	0.454014
	168.298	0.79331	432.07	2878.53	920.992	56.0943	0.757907	235.89	2640.2	803.686	0.255715	0.272391	0.527877	0.381306	0.492243	0.454854
	152.139	0.803076	366.961	2591.36	793.215	60.396	0.783804	248.55	2566.5	736.745	0.284183	0.252299	0.550117	0.373912	0.530611	0.441563
	160.953	0.810883	389.426	2716.08	804.081	50.1302	0.794031	259.325	2816.08	775.146	0.234084	0.238702	0.565161	0.370717	0.50163	0.444756
	148.256	0.793352	377.305	2722.44	853.769	40.4333	0.783254	274.645	2707.29	784.049	0.220485	0.264551	0.539953	0.382951	0.519628	0.443792
	207.843	0.784859	403.409	2897.41	929.822	43.8687	0.778706	206.316	2560.45	714.7	0.184454	0.278232	0.517135	0.386784	0.495815	0.455611
	163.029	0.796663	429.485	2876.36	914.242	37.8947	0.782728	203.664	2588.35	710.368	0.196222	0.260434	0.543979	0.380691	0.484733	0.449972
	161.935	0.790277	382.985	2600.74	837.805	35.4565	0.787756	255.969	2766.65	767.281	0.185033	0.267349	0.53719	0.382202	0.504742	0.44283
	103.013	0.807763	414.994	3008.53	896.02	33.2437	0.777634	231.028	2585.01	737.737	0.274675	0.248044	0.540579	0.376414	0.488344	0.44986
	148.806	0.801009	400.767	2728.54	852.409	41.9535	0.761702	235.052	2549.9	772.077	0.220197	0.263151	0.549684	0.377314	0.500117	0.45367
	173.042	0.829136	400.749	2874.17	815.505	38.2083	0.774533	241.928	2637.32	768.823	0.183221	0.221704	0.569291	0.365189	0.505301	0.450932
	174.969	0.793895	420.224	2918.79	915.732	35.6911	0.767668	262.403	2714.15	813.736	0.184005	0.269892	0.536959	0.380334	0.486933	0.452359
	155.003	0.786815	428	3027.52	966.046	46.7664	0.777544	245.481	2466.23	720.324	0.233818	0.275946	0.511001	0.384941	0.527215	0.440367
	209.539	0.827293	412.431	2975.3	845.713	52.1009	0.770093	279.345	2741.81	830.187	0.210445	0.224897	0.556083	0.368231	0.489005	0.448355
	189.742	0.785033	424.728	2697.67	902.973	37.8516	0.775888	247.564	2508.44	736.668	0.17108	0.278084	0.540657	0.384685	0.512934	0.446222
	172.835	0.816325	419.713	2932.43	869.745	34.8195	0.790954	231.864	2634.72	714.727	0.172144	0.233204	0.552329	0.372219	0.505467	0.442447
	180.301	0.807509	406.955	2995.94	895.173	35.6027	0.786338	244.488	2677.29	751.991	0.16729	0.246119	0.531249	0.378202	0.497072	0.452392
	137.663	0.782017	441.291	2965.56	971.557	33.1538	0.775779	249.546	2561.49	745.751	0.199931	0.283173	0.509106	0.387055	0.508643	0.445196
	204.868	0.815969	411.359	2943.14	858.907	38.1472	0.791886	233.953	2721.25	737.757	0.1781	0.233205	0.540304	0.373519	0.498174	0.444774
	160.054	0.796596	428.097	3041.81	943.657	30.5	0.781657	231.988	2664.14	738.637	0.164948	0.263391	0.526825	0.381538	0.494762	0.452082
	154.579	0.803257	417.106	2914.17	894.487	30.1929	0.799919	238.793	2594.09	700.149	0.168275	0.246534	0.544501	0.377086	0.508464	0.446092
	153.946	0.802181	424.578	2861.65	890.975	31.5833	0.796431	235.463	2663.79	713.749	0.172512	0.249411	0.549586	0.378964	0.511269	0.43954
	157.329	0.760433	495.701	3088.95	1097.69	36.4706	0.785811	277.448	2546.09	739.898	0.194952	0.306058	0.496802	0.39422	0.537783	0.438171
	154.302	0.789187	419.962	3120.32	979.428	29.3793	0.79786	236.249	2676.26	717.089	0.163861	0.265701	0.502132	0.385746	0.498724	0.443452
	125.892	0.797555	457.892	3115.08	974.559	31.6835	0.776082	280.081	2527	762.436	0.207876	0.262376	0.522175	0.382022	0.534929	0.44131
	124.954	0.78281	526.247	3386.95	1104.9	24.9231	0.789666	294.336	2764.39	783.681	0.176285	0.279376	0.505025	0.388756	0.513071	0.439957
	134.538	0.777018	420.455	3103	985.025	31.7143	0.786029	287.992	2428.32	716.327	0.197622	0.287296	0.508828	0.38717	0.551689	0.433869
	134.816	0.823069	431.665	3064.29	876.169	21.4474	0.791896	267.977	2616.52	735.597	0.142888	0.225196	0.563065	0.370166	0.518869	0.439176
test_2022_05_05_15_44	134.791	0.788466	310.524	2279.11	711.205	89.1872	0.756175	139.02	2099.09	605.188	0.395634	0.280512	0.538706	0.379852	0.445833	0.454067
test_2022_05_05_15_46	175.772	0.799123	341.693	2442.6	753.956	70.6842	0.698513	206.899	2425.24	848.83	0.293378	0.290596	0.541092	0.376148	0.418776	0.465924
	142.255	0.794853	293.316	2246.16	677.717	85.9724	0.750108	204.729	2423.95	744.917	0.373819	0.273935	0.549003	0.3763	0.444495	0.451896
	205.986	0.797927	308.723	2208.07	683.278	83.6545	0.72388	194.186	2318.36	763.319	0.301515	0.281354	0.572713	0.373256	0.4446	0.45687
	177.892	0.79742	307.198	2080.85	655.739	81.3547	0.743542	163.604	2189.79	666.157	0.329808	0.273978	0.592276	0.368477	0.460724	0.454172
	168.32	0.783535	290.17	2128.15	676.788	82.8652	0.766668	185.87	2342.5	673.404	0.340187	0.283975	0.556303	0.380256	0.461341	0.44819
	157.681	0.813152	329.377	2532.17	732.103	63.0798	0.763529	183.587	2554.55	730.931	0.293973	0.245426	0.559928	0.372519	0.426772	0.45171
	171.07	0.78653	309.985	2458.12	760.952	79.9561	0.724586	187.207	2146.93	712.623	0.319564	0.295816	0.536395	0.380717	0.450699	0.456984
	179.87	0.776275	288.793	2298.11	717.17	89.8766	0.750539	170.901	2125.83	644.211	0.336842	0.298516	0.526102	0.386674	0.474286	0.451638
	204.072	0.813778	328.417	2356.3	697.793	65.5475	0.743057	170.706	2398.31	732.22	0.249727	0.250523	0.580531	0.366213	0.424618	0.462494
	155.312	0.791642	288.573	2253.3	685.201	65.4375	0.727416	181.346	2009.12	653.199	0.305951	0.288783	0.551638	0.380434	0.481223	0.456336
	139.903	0.770654	330.267	2336.63	775.4	79.1395	0.753098	196.559	2270.19	693.859	0.378107	0.306317	0.520184	0.39085	0.470187	0.448837
	160.593	0.803126	329.898	2599.69	762.885	62.8325	0.736471	194.465	2356.54	743.475	0.293741	0.272069	0.541904	0.377224	0.437839	0.454985
	212.937	0.773329	396.981	2724.23	901.915	80.2421	0.776557	177.537	2351.03	645.988	0.29159	0.292216	0.513826	0.387804	0.464712	0.445832
	188.017	0.782449	338.331	2339.55	765.672	69.8261	0.722759	225.748	2268.52	761.62	0.284898	0.304983	0.550295	0.382177	0.451997	0.451832
	155.258	0.802471	322.866	2449.51	730.708	62.3841	0.785247	167.28	2367.69	627	0.305342	0.253707	0.556564	0.373815	0.446259	0.449636
	130.925	0.802768	368.515	2658.79	797.956	53.05	0.773837	182.592	2350.75	661.182	0.289552	0.256377	0.546256	0.373857	0.472316	0.446278
	183.791	0.779648	340.903	2550.97	810.82	71.9384	0.758548	191.955	2356.36	697.868	0.287549	0.291895	0.522321	0.384968	0.455625	0.44881
	151.045	0.797174	351.4	2450.02	763.529	53.2613	0.785662	149.761	2150.51	566.952	0.262967	0.258803	0.554833	0.375991	0.481035	0.445875
	168.355	0.770733	331.33	2376.52	779.906	70.4096	0.767677	149.466	2250.41	626.242	0.316339	0.30151	0.540071	0.386888	0.464648	0.452893
	153.859	0.78171	374.131	2696.98	858.336	54.4601	0.768156	173.92	2190.28	615.105	0.263221	0.286117	0.526336	0.384313	0.484413	0.441107
	153.242	0.835075	382.465	2643.6	737.971	43.7671	0.775591	197.718	2405.8	668.709	0.229229	0.215017	0.584661	0.358854	0.47173	0.443863
	189.991	0.788143	266.614	2006.71	625.411	66.3153	0.776333	160.538	2143.11	589.661	0.266449	0.274356	0.572771	0.373959	0.495685	0.446949
	133.496	0.807455	365.106	2711.9	803.341	46.2051	0.783084	165.095	2318.47	612.869	0.263041	0.248584	0.540964	0.378309	0.479518	0.443413
	188.043	0.796497	309.46	2141.85	675.998	65.0072	0.789631	150.398	2212.25	578.662	0.262032	0.258233	0.586599	0.372608	0.466211	0.446906
	191.147	0.796847	333.884	2376.28	735.978	50.3613	0.763188	160.896	2356.78	653.687	0.214509	0.267403	0.557206	0.375593	0.435029	0.456117
	137.974	0.797965	366.469	2381.46	759.619	37.6404	0.798788	152.223	2310.21	565.475	0.219172	0.255127	0.557456	0.374688	0.464801	0.444507
	219.156	0.78563	344.94	2367.43	765.631	71.5972	0.769664	184.066	2539.94	719.563	0.245527	0.279477	0.552101	0.380727	0.445283	0.450451
	153.94	0.798612	344.494	2458.49	750.026	45.4642	0.771301	163.077	2295.29	635.567	0.245566	0.26173	0.561435	0.374398	0.450929	0.453615
	178.699	0.797468	340.909	2306.34	725.107	51.8421	0.770284	167.799	2176.59	623.456	0.233741	0.264507	0.570615	0.372086	0.480865	0.450905
	158.833	0.786969	341.778	2534.26	784.155	50.3409	0.781353	152.107	2287.7	609.805	0.253847	0.273075	0.523083	0.380703	0.467872	0.451084
	185.713	0.809276	355.802	2605.71	767.823	57.8115	0.73288	195.713	2240.86	722.63	0.243277	0.2614	0.562786	0.371673	0.463165	0.454294
	125.902	0.787921	313.12	2411.67	738.328	52.7561	0.789949	217.833	2368.2	651.642	0.282538	0.269788	0.539267	0.380611	0.502781	0.43305
	174.192	0.797391	359.891	2752.6	830.379	52.4871	0.791106	148.888	2116.54	539.837	0.246165	0.257422	0.521797	0.378254	0.488247	0.439603
	193.571	0.792695	340.535	2297.46	738.911	50.9841	0.780935	186.927	2194.66	608.036	0.212529	0.268095	0.567442	0.375822	0.488018	0.439143
	168.148	0.802398	351.132	2562.6	771.497	46.1224	0.768891	180.446	2318.66	661.441	0.218765	0.259186	0.553587	0.37424	0.45828	0.448868
	144.753	0.767097	380.713	2776.98	917.337	51.5571	0.767438	157.128	2183.95	608.77	0.281391	0.306334	0.501418	0.390996	0.457951	0.451139
	197.11	0.795192	382.823	2872.17	873.013	62.9153	0.774501	170.879	2165.97	602.301	0.263936	0.265361	0.507261	0.380194	0.486452	0.443685
	164.941	0.812366	354.237	2410.64	734.394	48.9588	0.805073	136.755	1953.69	481.038	0.241278	0.233878	0.576497	0.36893	0.522801	0.43626
	177.609	0.790361	330.613	2651.77	805.796	54.0483	0.772531	183.06	2124.34	611.592	0.235068	0.273651	0.524813	0.383487	0.485587	0.445393
	142.497	0.805743	369.477	2550	775.803	44.0182	0.78899	179.641	2375.11	625.35	0.244998	0.247627	0.557031	0.371757	0.483545	0.440209
	164.784	0.812181	381.036	2935.95	848.258	40.8894	0.780929	156.475	2282.73	610.053	0.203355	0.241453	0.52902	0.373551	0.476613	0.450113
	175.706	0.802382	381.498	2753.25	833.43	48.4176	0.773963	171.307	2197.51	605.842	0.219279	0.258416	0.539099	0.374808	0.481605	0.442308
	129	0.811587	363.73	2657.6	778.626	45.6493	0.770571	195.2	2248.82	647.353	0.266973	0.247665	0.541353	0.370732	0.487547	0.442861
	174.084	0.806958	339.851	2372.54	721.71	47.1869	0.758331	197.643	2398.62	705.17	0.212081	0.256995	0.575474	0.367286	0.46851	0.447138
	125.51	0.791332	369.494	2780.39	853.703	36.869	0.807141	126.801	2116.13	484.394	0.244948	0.262007	0.518266	0.382966	0.472661	0.437396
	135.328	0.823927	357.366	2635.44	733.126	46.184	0.76446	193.682	2083.55	618.87	0.256	0.232387	0.566139	0.363001	0.518432	0.438997
	226.175	0.859056	336.904	2410.58	626.217	51.5734	0.758406	165.972	2604.7	736.502	0.182242	0.187383	0.634645	0.3416	0.412284	0.454099
	165.557	0.803851	375.644	2797.12	836.006	38.7377	0.771694	212.116	2394.65	682.57	0.191805	0.255126	0.536599	0.374945	0.47213	0.442851
	140.105	0.813834	356.359	2572.2	756.098	42.7238	0.811266	149.657	2337.02	543.774	0.242265	0.23123	0.555784	0.370085	0.48199	0.438996
	142.481	0.80525	380.409	2879.43	841.064	36.6952	0.808751	141.428	2200.61	516.429	0.210223	0.241615	0.534379	0.373986	0.498885	0.439355
	152.97	0.833641	396.67	2847.44	791.643	37.8416	0.758392	145.474	1844.34	533.272	0.204486	0.221742	0.5679	0.362798	0.511974	0.444259
	117.875	0.767729	329.289	2369.23	767.858	51.7426	0.783674	164.729	2157.74	574.512	0.309507	0.299941	0.544384	0.383782	0.496352	0.43989
	127.877	0.803232	351.414	2690.94	793.089	44.7304	0.787878	150.071	2342.36	588.851	0.267639	0.251626	0.540619	0.374751	0.440062	0.44243
	167.315	0.777831	412.921	2569.66	880.455	53.0463	0.785555	199.188	2220.99	612.673	0.248384	0.284229	0.53199	0.389717	0.501858	0.433849
	142.944	0.81803	379.481	2659.47	755.226	50.6667	0.791842	140.255	2156.74	542.133	0.262517	0.231903	0.564262	0.364308	0.495628	0.447359
	117.821	0.819772	381.785	2714.04	780.496	37.5598	0.819258	156.36	2564.41	580.802	0.250398	0.21946	0.569762	0.365772	0.45776	0.438152
	139.052	0.82442	402.544	2750.23	800.725	33.4588	0.793302	169.766	2326.73	597.489	0.207279	0.223068	0.564031	0.366172	0.470198	0.442834
	104.564	0.799292	360.565	2520.38	768.522	36.6992	0.792452	182.887	2218.69	571.867	0.26245	0.255977	0.552717	0.37386	0.532681	0.429839
	158.67	0.794383	389.732	2853.6	875.448	47.2485	0.775445	205.878	2358.83	655.229	0.223525	0.268375	0.529763	0.379815	0.480245	0.437141
	129.658	0.78416	397.364	2912.44	912.061	58.0919	0.785364	179.498	2124.35	574.92	0.301354	0.276127	0.517542	0.384485	0.517879	0.433548
	137.504	0.805573	392.925	2802.47	843.303	41.1752	0.779531	192.961	2212.62	605.476	0.23743	0.252486	0.538495	0.375359	0.512672	0.432331
	120.172	0.81915	400.087	2956.28	846.975	31.6183	0.819476	172.394	2267.96	518.075	0.204818	0.22202	0.545378	0.372461	0.508334	0.424133
	139.42	0.809249	397.779	2821.13	840.353	32.967	0.79868	154.919	2172.47	537.633	0.197666	0.242374	0.551555	0.372319	0.492305	0.438071
	125.45	0.79824	394.351	2698.19	843.746	33.0826	0.767545	174.595	2031.97	581.806	0.215459	0.264898	0.548101	0.377588	0.522104	0.437025
	99.1727	0.790513	389.132	2783.22	861.218	35.8	0.786868	196.76	2202.48	600.898	0.271022	0.267219	0.528905	0.382133	0.517043	0.433925
	127.195	0.791768	361.641	2605.77	806.602	34.5409	0.802707	155.577	2141.52	523.931	0.211075	0.260688	0.56113	0.375259	0.506145	0.43439
	130.509	0.811304	381.64	2892.92	837.105	32.4971	0.772105	189.769	2196.16	627.373	0.204334	0.245515	0.534367	0.370679	0.493086	0.443067
	110.615	0.813049	390.178	2655.81	783.954	27.2083	0.821775	160.858	2540.86	550.978	0.199117	0.230404	0.570733	0.3682	0.486597	0.428219
	116.532	0.779572	402.342	2890.44	933.033	25.3306	0.800058	157.006	2186.92	525.452	0.188077	0.278798	0.504158	0.390162	0.480271	0.432688
	113.768	0.808125	413.234	2915.45	873.849	28.0488	0.800061	208.963	2413.12	628.46	0.197871	0.241877	0.540258	0.374801	0.487071	0.439546
	109.707	0.800948	374.157	2597.1	785.47	29.0479	0.825255	163.695	2214.09	498.965	0.212585	0.242271	0.565519	0.369696	0.523746	0.420117
	143.777	0.781186	392.37	2777.95	900.81	38.5804	0.80534	178.027	2175.65	554.73	0.215675	0.27328	0.516168	0.386862	0.528603	0.430137
	132.937	0.807848	389.473	2865.1	844.915	35.1937	0.799781	189.717	2286.58	597.377	0.215932	0.240902	0.542745	0.373898	0.511272	0.436508
	86.4453	0.763714	502.074	3367.61	1109.9	30.8906	0.783606	220.344	2327.68	647.823	0.262046	0.302642	0.488581	0.393917	0.498506	0.44019
	109.205	0.801957	422.615	2813.18	872.05	25.4489	0.796075	184.777	2318.64	581.982	0.196746	0.25176	0.554347	0.377252	0.497237	0.431795
	114.591	0.795199	392.247	2928.25	881.897	28.7468	0.789372	189.277	2311.4	590.644	0.203634	0.262996	0.524779	0.378409	0.482469	0.435292
	96.2688	0.798485	410.816	3020.28	915.286	27.7634	0.794192	161.749	2140.58	547.115	0.233689	0.255777	0.53867	0.381662	0.509495	0.437031
	97.6739	0.752641	451.997	3157.39	1100.79	32.3986	0.803723	190.27	2330.3	577.883	0.251158	0.309107	0.470723	0.40086	0.500188	0.427009
	69.9316	0.794318	434.604	3174.95	964.242	30.5385	0.785719	225.902	2270.51	628.503	0.291706	0.26235	0.515256	0.381727	0.529278	0.430637
	93.6604	0.777924	399.711	2661.45	859.444	29.2736	0.818172	207.288	2403.31	561.794	0.241794	0.272042	0.540541	0.381711	0.510065	0.416921
	89.3961	0.820232	429.311	3179.49	898.03	26.4091	0.777825	177.608	2325.32	601.426	0.234684	0.235193	0.548172	0.369415	0.503273	0.436377
	91.7822	0.780887	411.02	2803.02	910.298	29.5495	0.780727	211.867	2223.02	611.112	0.257055	0.285896	0.538647	0.38418	0.516914	0.432643
	86.4702	0.811358	459.198	3307.79	965.23	27.131	0.79604	191.578	2206.18	559.198	0.242645	0.239389	0.526673	0.372214	0.517972	0.425059
	95.6966	0.820253	449.813	3432.24	953.118	30.731	0.770465	182.709	2053.15	589.673	0.233118	0.2339	0.52924	0.371355	0.51822	0.435405
	97.8688	0.791147	422.341	2956.86	925.735	24.675	0.774069	181.093	2016.16	553.579	0.202564	0.273654	0.521491	0.381018	0.545882	0.428866
	92.7317	0.79646	454.009	3021.18	933.391	22.161	0.798727	232.079	2315.28	621.648	0.19494	0.255819	0.531434	0.377691	0.516928	0.429156
	101.552	0.782353	425.431	2873.93	936.147	34.5241	0.78961	199.756	2198.35	591.458	0.23851	0.27774	0.528107	0.382593	0.542441	0.430589
	88.1939	0.800748	380.555	2720.78	820.08	21.4082	0.819499	151.15	2165	488.587	0.197747	0.244015	0.557052	0.37279	0.497148	0.430532
	78.7541	0.799091	438.922	3220.1	957.298	20.918	0.79573	206.701	2227.7	568.593	0.212673	0.256259	0.514191	0.379715	0.534272	0.427507
	87.3322	0.788156	398.233	2884.65	876.638	22.4349	0.810523	187.758	2164.87	526.023	0.208166	0.265042	0.52917	0.380933	0.545073	0.42043
	87.5923	0.778603	509.016	3559.76	1143.68	18.1	0.806922	190.373	2508.26	573.445	0.179069	0.275067	0.493934	0.388811	0.485462	0.425576
	74.6601	0.805649	446.02	2845.83	877.121	21.1961	0.793199	234.541	2329.4	630.997	0.225025	0.248221	0.551386	0.376146	0.512016	0.428295
test_2022_05_05_15_47	150.619	0.820372	314.958	2439.06	680.761	57.619	0.773636	188.302	2449	677.734	0.286499	0.232263	0.584095	0.358332	0.43894	0.445256
test_2022_05_05_15_49	163.469	0.830641	330.643	2142.48	626.378	61.5044	0.745229	173.341	2413.03	722.983	0.285366	0.229728	0.631094	0.351381	0.420047	0.45855
	155.984	0.813038	350.168	2471.76	737.692	70.5526	0.730505	204.62	2333.31	758.657	0.32313	0.257531	0.580497	0.367431	0.435417	0.456589
	154.641	0.810002	287.468	2108.04	620.993	71.9542	0.768433	192.926	2384.4	691.703	0.328398	0.24815	0.601091	0.361735	0.46674	0.451288
	162.678	0.81564	356.934	2411.66	727.458	68.5673	0.754945	172.237	2344.94	689.963	0.319939	0.245632	0.582867	0.365191	0.428219	0.456125
	168.323	0.797453	334.617	2311.25	718.424	71.1456	0.746815	213.494	2537.18	782.961	0.305198	0.272554	0.5764	0.371774	0.435445	0.450474
	174.945	0.814575	356.366	2508.09	736.913	69.7344	0.731554	195.52	2370.15	751.331	0.296679	0.25744	0.571215	0.367182	0.438676	0.455476
	148.667	0.79703	382.259	2680.66	836	80.0379	0.739545	212.715	2368.29	759.999	0.352121	0.274904	0.532387	0.381174	0.448194	0.455066
	146.193	0.832451	328.894	2706.21	705.861	61.0267	0.744275	205.065	2353.75	738.821	0.307045	0.226315	0.561881	0.360825	0.459372	0.454686
	183.058	0.796399	303.554	2159.78	669.532	76.4244	0.753484	216.447	2494.4	757.101	0.301808	0.271765	0.561137	0.371528	0.45927	0.448301
	156.52	0.802112	358.563	2513.49	772.847	51.49	0.737484	201.784	2351.96	751.808	0.257398	0.270012	0.559599	0.37538	0.462974	0.459939
	143.806	0.798641	324.558	2391.89	718.574	57.8878	0.746266	182.464	2459.09	731.002	0.3082	0.273849	0.565744	0.370882	0.435147	0.455537
	231.443	0.800971	325.341	2249.25	697.912	77.5174	0.743416	204.231	2355.65	739.911	0.251847	0.269197	0.571588	0.371065	0.452251	0.453004
	159.239	0.818653	355.431	2542.89	744.467	62.928	0.764799	183.858	2226.29	654.134	0.288828	0.237719	0.563801	0.36754	0.466956	0.447284
	190.197	0.777729	348.061	2453.09	801.713	70.1064	0.771866	156.159	2342.4	647.443	0.290106	0.289826	0.534032	0.385341	0.44609	0.455366
	110.082	0.791246	356.406	2648.75	814.087	42.7164	0.748566	229.048	2355.77	726.097	0.289154	0.279301	0.538629	0.378125	0.464665	0.446567
	121.228	0.777413	317.901	2305.71	739.76	49.4605	0.781051	176.113	2514.59	663.488	0.303583	0.287571	0.534728	0.381875	0.440996	0.444029
	130.618	0.778301	311.465	2289.31	729.825	71.2085	0.779488	175.843	2435.09	659.191	0.356293	0.286029	0.538851	0.381679	0.453988	0.445756
	142.871	0.789887	371.643	2550.03	807.133	55.8952	0.771841	131.304	2227.11	596.195	0.294781	0.272052	0.557727	0.377444	0.447932	0.455344
	170.348	0.766142	339.93	2440.33	809.919	63.2826	0.78171	199.443	2455.35	665.97	0.278654	0.300847	0.513111	0.388177	0.467293	0.438058
	151.812	0.797038	360.252	2487.79	779.49	51.4887	0.748769	225.079	2422.42	734.623	0.25757	0.275719	0.538404	0.37792	0.471976	0.440374
	182.687	0.775149	333.619	2092.8	717.844	62.4733	0.753108	204.107	2249.22	682.711	0.274203	0.300276	0.563136	0.377413	0.481539	0.445385
	155.918	0.795815	344.064	2466.12	757.912	59.069	0.753884	207.351	2222.56	682.494	0.279255	0.271855	0.542774	0.375723	0.484014	0.444954
	130.39	0.807765	336.213	2511.72	737.49	60.2032	0.793199	173.964	2260.99	590.057	0.308453	0.243316	0.555742	0.372182	0.496784	0.436831
	142.268	0.799516	351.14	2584.4	780.12	52.1616	0.763363	220.026	2495.47	732.135	0.276615	0.264195	0.533752	0.375661	0.451269	0.445082
	137.727	0.771561	352.645	2414.32	804.499	74.6788	0.773455	216.949	2306.25	673.35	0.372542	0.29645	0.520941	0.388436	0.480601	0.438855
	156.183	0.802435	361.622	2730.52	814.87	55.2581	0.776672	218.274	2296.28	664.03	0.264355	0.255292	0.542628	0.377551	0.504343	0.436692
	162.245	0.783058	349.231	2577.03	792.978	66.1837	0.760975	205.662	2315.16	699.918	0.294922	0.284518	0.52799	0.379568	0.478938	0.446674
	180.093	0.804555	356.984	2451.24	750.058	46.2065	0.756921	176.619	2419.82	678.169	0.216129	0.26378	0.564067	0.371388	0.445946	0.452194
	128.851	0.798612	325.888	2295.69	705.255	54.3433	0.760898	230.56	2342	715.444	0.293807	0.265439	0.562915	0.369085	0.493272	0.4421
	151.012	0.791974	369.151	2711.77	836.853	57.4556	0.753092	198.039	2309.81	698.789	0.281495	0.278801	0.526083	0.380488	0.478794	0.447812
	165.647	0.801556	334.19	2286.18	700.083	47.6271	0.759128	193.834	2379.21	695.486	0.24971	0.262989	0.588093	0.365151	0.438762	0.448487
	191.893	0.78998	366.099	2706.12	842.551	53.4215	0.744277	200.664	2243.27	686.45	0.227198	0.286139	0.5177	0.382535	0.471684	0.447892
	174.482	0.806667	369.579	2733.27	810.925	43.4699	0.772047	179.143	2378.91	650.37	0.208294	0.253728	0.536098	0.375458	0.465468	0.445534
	152.598	0.769268	364.095	2532.23	846.787	52.3886	0.777354	188.905	2178.93	616.528	0.263118	0.298346	0.525024	0.388523	0.50836	0.437969
	138.647	0.778429	344.714	2512.14	802.308	54.2082	0.776533	179.348	2220.23	619.418	0.302242	0.285833	0.529491	0.384521	0.492142	0.444142
	175.249	0.815505	351.001	2658.75	770.428	49.9187	0.750472	184.342	2324.23	697.267	0.226527	0.246544	0.550395	0.369983	0.46253	0.450909
	193.24	0.822228	359.521	2696.01	759.021	47.8295	0.768344	198.786	2435.25	691.952	0.205811	0.232832	0.563363	0.367084	0.454143	0.446363
	183.8	0.785819	353.843	2506.05	801.368	48.2778	0.762604	252.699	2435.91	738.887	0.212875	0.28307	0.537154	0.381192	0.491996	0.436212
	136.089	0.790436	345.104	2558.36	792.697	48.6436	0.746961	226.076	2327.31	688.069	0.270148	0.286239	0.531933	0.381708	0.505104	0.43854
	148.957	0.81774	358.66	2676.72	767.533	40.2766	0.774648	210.615	2557.26	694.761	0.216239	0.239014	0.568509	0.368163	0.467628	0.440007
	169.679	0.792676	372.531	2506.53	797.893	49.4946	0.768771	175.635	2232.19	623.015	0.235048	0.270605	0.56091	0.378285	0.486931	0.440339
	149.534	0.803149	435.012	3123.54	942.723	47.3103	0.761751	210.041	2489.6	729.537	0.254322	0.260648	0.513143	0.379905	0.451777	0.446746
	136.319	0.807898	340.699	2412.79	721.312	38.7572	0.781675	160.278	2293.54	607.681	0.227612	0.248107	0.582207	0.364854	0.466956	0.448972
	136.379	0.784712	386.283	2759.96	881.96	45.8788	0.79583	195.51	2621.08	664.703	0.26186	0.271342	0.52257	0.384906	0.469093	0.43649
	129.5	0.776806	421.417	2771.38	914.913	44.6042	0.776943	183.96	2212.13	617.078	0.262849	0.290504	0.517327	0.385914	0.482604	0.440416
	159.385	0.810818	370.242	2669.04	788.742	46.3462	0.75863	190.059	2240.76	660.305	0.228629	0.251106	0.547442	0.371497	0.467887	0.448023
	138.931	0.816387	383.459	2761.14	795.14	44.6695	0.794249	161.481	2254.42	580.119	0.277347	0.231765	0.560802	0.369547	0.479341	0.442863
	111.34	0.810695	378.698	2873.84	818.5	36.1474	0.779563	167.315	2281.21	602.172	0.257902	0.24684	0.536986	0.371451	0.474473	0.446038
	112.402	0.812636	361.428	2508.85	745.784	38.3696	0.744269	183.392	2224.04	679.223	0.261849	0.254089	0.577952	0.365356	0.464642	0.455143
	165.752	0.809479	384.133	2696.61	805.886	52.608	0.775494	172.315	2124	587.271	0.246517	0.247627	0.552124	0.371042	0.488996	0.435956
	150.053	0.797231	389.127	2859.75	866.705	46.3529	0.775212	184.218	2052.62	585.907	0.243703	0.263323	0.524003	0.379435	0.501526	0.439455
	114.359	0.828316	385.835	2773.04	769.007	36.3478	0.805288	142.146	2365.39	537.326	0.304279	0.219193	0.578427	0.363084	0.471731	0.434032
	137.336	0.791921	374.206	2569.29	810.447	36.1094	0.781357	198.7	2314.88	616.635	0.21593	0.270848	0.546701	0.378061	0.469475	0.433753
	142.439	0.783426	354.376	2520.72	797.136	45.6061	0.76735	163.132	2043.84	583.018	0.245934	0.284862	0.540576	0.378273	0.483374	0.447298
	149.757	0.794401	369.889	2633.52	804.926	51.8429	0.792771	177.117	2265	593.774	0.267648	0.260135	0.552087	0.377496	0.495362	0.439888
	79.5487	0.745218	335.744	2239.82	772.178	38.1416	0.79081	150.888	2296.57	573.461	0.389017	0.323255	0.54965	0.386765	0.464014	0.444211
	108.79	0.789758	360.643	2782.13	850.684	44.537	0.803287	183.704	2501.75	615.507	0.347084	0.26458	0.526101	0.384353	0.467176	0.431793
	122.592	0.793237	386.795	2869.22	880.042	41.3761	0.77126	203.422	2413.29	697.382	0.258388	0.268632	0.516395	0.381566	0.463586	0.444912
	133.005	0.792543	395.275	2949.49	902.868	40.7913	0.769615	180.045	2192.05	619.377	0.241399	0.270938	0.519436	0.383152	0.508934	0.442632
	140.73	0.815611	372.653	2435.02	732.809	44.8928	0.779241	207.122	2326.97	645.098	0.241918	0.238395	0.593694	0.363484	0.503978	0.436468
	81.1029	0.779983	371.073	2864.65	870.427	40.746	0.797858	162.502	2405.7	595.061	0.413568	0.276334	0.514685	0.387086	0.45609	0.438331
	104.764	0.79235	381.521	2639.54	804.855	36.4503	0.808846	178.145	2225.4	555.915	0.261327	0.257483	0.557976	0.369145	0.522504	0.428275
	105.241	0.841257	401.774	2864.24	772.582	32.1019	0.784363	219.509	2488.83	676.15	0.230307	0.204268	0.588065	0.35698	0.481878	0.434511
	119.621	0.775672	384.88	2793.83	898.565	36.0658	0.786844	212.316	2489.8	669.197	0.245835	0.286331	0.5172	0.385707	0.466747	0.436451
	108.185	0.779772	357.523	2662.51	825.471	43.7395	0.805476	156.286	2376.75	578.308	0.321987	0.273906	0.533471	0.380193	0.503521	0.43927
	100.838	0.781265	369.439	2424.32	769.817	34.9369	0.795084	180.142	2295.88	598.23	0.26097	0.275453	0.570414	0.37226	0.505594	0.434816
	97.9502	0.813184	369.161	2781.36	800.08	40.4027	0.801604	184.385	2244.39	569.276	0.300263	0.234652	0.543382	0.371174	0.518665	0.430179
	133.448	0.811252	391.488	2687.41	810.646	34.3312	0.763379	208.147	2271.59	661.25	0.203896	0.250388	0.56559	0.372181	0.491704	0.437939
	125.433	0.802105	388.471	2697.75	824.573	46.4326	0.766178	190.423	2152.61	615.945	0.275079	0.261237	0.55484	0.37375	0.496977	0.436496
	127.651	0.81702	407.114	2771.86	821.996	39.3679	0.786412	205.852	2271.38	627.19	0.234387	0.233072	0.561081	0.371297	0.521025	0.435398
	111.09	0.810596	418.907	2940.4	874.121	44.11	0.798769	184.086	2252.34	578.98	0.281394	0.239519	0.541566	0.373244	0.522979	0.432124
	152.568	0.789466	365.963	2577.75	810.496	34.4129	0.766708	245.254	2335.51	683.398	0.186177	0.27514	0.551272	0.379868	0.503155	0.436572
	125.425	0.797546	369.602	2717.73	818.665	32.746	0.805671	172.359	2367.92	578.744	0.212396	0.252738	0.537798	0.374806	0.4908	0.434601
	104.89	0.792444	390.477	2844.3	878.122	43.0515	0.792842	169.02	2201.81	576.712	0.310129	0.265539	0.520965	0.381676	0.512791	0.439965
	130.839	0.804825	428.968	2942.75	907.831	35.6559	0.773971	210.408	2303.51	654.445	0.216343	0.253936	0.541131	0.37708	0.508285	0.434038
	127.99	0.787794	422.424	2783.14	897.576	36.5813	0.77082	240.737	2406.03	701.113	0.230642	0.27914	0.544168	0.3804	0.499569	0.439605
	104.639	0.800037	423.393	2997.99	914.2	36.5069	0.734032	240.932	2163.96	694.937	0.262233	0.278605	0.518317	0.378412	0.49681	0.439915
	159.309	0.771943	438.879	3000.87	1005.95	41.3333	0.792614	187.093	2436.6	628.177	0.2084	0.289929	0.501219	0.389567	0.486483	0.439458
	111.057	0.811205	397.725	2761.47	833.591	30.8868	0.792965	228.317	2623.21	700.691	0.21913	0.238695	0.560402	0.371245	0.494034	0.436027
	139.789	0.790641	460.429	3171.31	1005.31	28.2222	0.789126	169.876	2297.49	599.108	0.178897	0.266766	0.501119	0.385777	0.501866	0.442396
	80.5944	0.79045	444.144	3285.19	1003.06	36.2238	0.783727	202.822	2374.46	642.342	0.311744	0.271032	0.496337	0.384668	0.50902	0.436294
	112.407	0.783637	466.685	2901.66	958.029	27.7186	0.762656	231.502	2436.21	687.089	0.200492	0.29275	0.527977	0.385734	0.497485	0.435979
	78.6	0.753768	451.908	3032.49	1008.79	30.8	0.802087	232.878	2574.91	659.254	0.285636	0.310396	0.510695	0.387853	0.528075	0.42991
	85.1667	0.824085	424.636	3197.58	881.395	23.7879	0.794008	258.156	2474.12	668.718	0.223364	0.225042	0.545043	0.368942	0.487514	0.431764
	117.816	0.810717	457.525	3007.07	897.616	34.9728	0.807905	163.871	2312.24	562.448	0.232675	0.234894	0.561346	0.37395	0.497788	0.432912
	97.1642	0.787619	447.088	3037.73	940.847	24.806	0.796221	200.257	2271.02	580.727	0.209161	0.268617	0.532441	0.378779	0.53113	0.425802
	95.1063	0.816024	453.158	3173.47	933.544	23.401	0.789051	192.885	2356.14	598.036	0.208571	0.236506	0.54691	0.372467	0.508009	0.428091
	75.2819	0.768539	475.739	3258.46	1061.41	24.8245	0.778616	211.468	2353.38	636.423	0.254061	0.298641	0.495909	0.390631	0.530284	0.431509
	79.3699	0.817821	420.521	3074.9	864.777	25.4018	0.782785	202.845	2357.27	629.057	0.246626	0.236674	0.556475	0.368687	0.513775	0.435328
test_2022_05_05_15_56	121.494	0.767873	270.18	2282.5	723.937	96.8736	0.770204	153.204	2146.81	600.146	0.437208	0.302913	0.496882	0.394968	0.469148	0.450453
test_2022_05_05_15_57	122.088	0.79243	313.281	2353.4	721.56	65.5877	0.790961	118.797	2069.71	520.478	0.348684	0.262317	0.550392	0.379719	0.479179	0.45367
	148.956	0.757746	330.22	2470.2	833.516	71.8963	0.75757	154.515	2432.27	693.025	0.332983	0.322809	0.514959	0.39383	0.407995	0.459072
	106.404	0.8336	332.384	2658.11	705.156	46.3645	0.76972	168.869	2278.82	632.438	0.315656	0.218506	0.565665	0.362192	0.466793	0.445899
	140.845	0.796561	330.404	2417.05	744.856	77.181	0.751713	151.574	2102.18	620.553	0.349166	0.2727	0.542385	0.378698	0.460702	0.45637
	134.131	0.782348	303.077	2336.63	732.684	79.8207	0.770989	147.45	2142.02	599.961	0.381565	0.283186	0.522504	0.385183	0.47047	0.451117
	109.546	0.759748	319.475	2557.8	830.794	56.239	0.785772	122.444	2410.81	602.957	0.358525	0.308542	0.49909	0.394155	0.414459	0.460059
	149.775	0.793848	315.362	2239.82	695.641	70.9412	0.795772	121.114	2167.56	530.774	0.330591	0.260176	0.562768	0.375786	0.464421	0.452769
	130.126	0.797227	333.485	2647.21	782.609	65.2186	0.788806	142.853	2149.52	554.381	0.348253	0.259275	0.522758	0.379751	0.482419	0.447377
	180.541	0.808873	330.24	2247.6	676.954	70.1294	0.789212	171.104	2181.1	584.338	0.298987	0.24266	0.581101	0.363687	0.49074	0.439409
	152.982	0.7937	338.519	2638.32	802.214	62.7393	0.768077	168.068	2134.56	609.072	0.302792	0.270001	0.532381	0.382156	0.472703	0.4463
	150.6	0.800019	297.528	2334.73	688.169	57.2769	0.792363	118.214	2299.04	554.923	0.289341	0.253608	0.56378	0.371456	0.444671	0.454253
	167.047	0.776386	338.362	2495.6	806.169	65.2706	0.762755	153.122	2085.37	604.043	0.2918	0.293738	0.52504	0.387886	0.477188	0.4554
	180.148	0.807315	314.464	2347.86	700.443	52.6831	0.797076	129.253	2146.58	529.33	0.234116	0.242714	0.570389	0.372604	0.469324	0.448132
	153.732	0.788032	321.975	2380.64	744.732	63.4152	0.765801	162.781	2130.04	610.406	0.297918	0.278646	0.541493	0.378327	0.471687	0.45065
	130.496	0.751314	367.841	2538.96	889.82	64.8595	0.76927	131.421	1876.81	528.078	0.34289	0.324653	0.504558	0.396377	0.474904	0.448656
	198.716	0.82754	310.618	2303.17	641.001	58.3529	0.772854	171.312	2366.7	648.82	0.239915	0.225346	0.593511	0.358141	0.461104	0.450138
	149.111	0.797865	339.515	2624.58	787.313	72.0386	0.796052	152.527	2235.25	569.76	0.335921	0.254463	0.522688	0.380479	0.477807	0.445182
	186.659	0.830517	309.524	2177.5	616.886	55.8865	0.772663	137.32	2044.95	561.388	0.238714	0.220247	0.615516	0.354489	0.471682	0.450092
	116.471	0.800195	331.211	2572.53	759.043	51.4571	0.782574	141.301	1987.33	531.037	0.316407	0.256069	0.546724	0.375082	0.50072	0.444071
	150.393	0.810102	332.969	2621.57	754.417	59.6704	0.803278	142.082	2355.34	562.936	0.306828	0.236759	0.550403	0.371752	0.459391	0.445868
	124.654	0.782205	338.938	2380.02	759.594	65.2867	0.801888	141.888	2038.42	506.31	0.342622	0.272505	0.533344	0.37962	0.500843	0.442201
	151.979	0.817019	348.077	2687.36	760.961	47.3262	0.778856	187.349	2336.68	646.49	0.24379	0.236344	0.555095	0.369615	0.464194	0.443981
	110.027	0.814241	365.754	2843.05	802.231	45.4922	0.803997	131.759	2050.68	491.402	0.307868	0.233297	0.546464	0.369892	0.48391	0.437979
	139.871	0.8081	349.768	2528.12	756.877	45.4914	0.797129	186.649	2447.73	637.286	0.257503	0.242187	0.57289	0.371382	0.459421	0.437497
	169.185	0.816087	325.905	2310.37	680.349	44.1933	0.787387	142.348	2099.82	538.409	0.215718	0.23622	0.578396	0.363502	0.475724	0.441372
	158.56	0.816688	295.213	2139.91	625.418	41.16	0.802876	145.04	2193.29	528.013	0.21026	0.231583	0.597268	0.361668	0.473779	0.437192
	164.935	0.801096	381.714	2633.86	812.141	63.3636	0.798793	136.958	2091.48	515.713	0.286556	0.250287	0.539921	0.376697	0.490658	0.441166
	155.164	0.804168	362.977	3032.92	871.078	56.1045	0.805256	146.152	2259.82	547.235	0.273717	0.24404	0.501712	0.377765	0.483345	0.443251
	97.5031	0.805969	346.109	2512.95	741.395	31.441	0.811083	182.161	2440.85	586.094	0.254303	0.241294	0.562017	0.370686	0.471819	0.432894
	145.843	0.81589	389.304	3046.39	860.025	46.2484	0.782519	174.291	2148.06	570.241	0.244857	0.238733	0.529433	0.372771	0.49843	0.439028
	125.213	0.805434	363.909	2718.09	803.897	44.5984	0.811034	137.537	2180.63	513.785	0.270194	0.240199	0.547326	0.375846	0.492076	0.440011
	136.229	0.805225	393.527	2875.93	861.626	43.0278	0.797501	160.132	2094.64	525.954	0.243866	0.246333	0.537153	0.37583	0.491626	0.436437
	92.3077	0.790469	341.104	2729.4	817.103	35.6593	0.763013	170.131	2223.64	637.875	0.290742	0.279002	0.527254	0.382375	0.47376	0.450638
	126.909	0.828371	369.477	2664.24	749.025	54.7576	0.838385	112.615	1947.77	403.174	0.303265	0.205708	0.571195	0.361066	0.534251	0.429627
	128.224	0.793224	415.143	2845.16	903.988	43.056	0.800858	158.887	2222.71	552.069	0.252869	0.260277	0.524312	0.381557	0.487084	0.4406
	127.839	0.778485	385.02	2765.95	886.754	42.146	0.797737	145.62	2141.27	537.432	0.252391	0.279648	0.513944	0.386098	0.470746	0.447496
	97.5	0.78224	343.815	2524.14	784.046	35.9156	0.810766	170.08	2190.64	526.314	0.282087	0.27099	0.537906	0.376853	0.519154	0.428087
	136.67	0.796806	341.512	2619.9	787.263	40.38	0.778335	151.066	1946.35	528.219	0.233947	0.263591	0.527617	0.378377	0.501908	0.43884
	110.316	0.787267	364.343	2669.22	836.787	39.2073	0.825082	145.978	2263.56	498.925	0.267834	0.258387	0.52144	0.38288	0.482331	0.430724
	80.9372	0.783635	353.504	2529.08	798.529	35.5411	0.801603	154.391	2157.89	527.994	0.314584	0.272116	0.529465	0.379631	0.510948	0.433286
	99.4812	0.804656	365.68	2719.16	801.444	36.2256	0.813113	163.476	2280.36	529.4	0.265806	0.24175	0.560311	0.372467	0.491018	0.424676
	135.019	0.817859	360.3	2635.35	760.811	39.7009	0.758655	159.049	1969.58	564.574	0.225069	0.243819	0.557093	0.36726	0.500165	0.442325
	132.591	0.806116	367.064	2835.57	820.192	39.0698	0.799823	151.311	2092.94	523.011	0.23687	0.244025	0.538437	0.374679	0.508594	0.440873
	94.7281	0.818148	354.131	2733.87	752.507	32.235	0.819572	143.748	2315.48	517.333	0.313154	0.221737	0.547356	0.367658	0.498261	0.435414
	102.271	0.811171	342.39	2593.47	739.653	38.5059	0.830668	148.274	2054.33	452.163	0.274275	0.229415	0.5645	0.369144	0.528231	0.421035
	121.586	0.817626	392.948	2660.33	786.684	28.3838	0.819102	144.036	2268.98	511.606	0.191012	0.223224	0.570595	0.368506	0.483751	0.42876
	97.904	0.814558	364.019	2695.39	779.004	33.3	0.808157	159.755	2192.94	529.449	0.256641	0.230978	0.555189	0.368569	0.496162	0.432943
	95.3516	0.777757	407.819	2997.31	930.522	30.5128	0.829894	143.072	2284.78	485.123	0.2522	0.26828	0.513524	0.382442	0.487159	0.429546
	120.939	0.806053	349.445	2520.67	743.221	32.3333	0.818337	161.491	2271.98	519.565	0.217788	0.239858	0.567514	0.366825	0.505693	0.437652
	113.199	0.8181	373.117	2955.27	828.879	32.2397	0.781564	199.372	2334.49	611.736	0.229548	0.233015	0.528491	0.373006	0.50403	0.431949
	100.752	0.774998	378.084	2937.55	938.921	29.0661	0.804445	128.509	2113.36	485.91	0.23209	0.281484	0.487396	0.393012	0.519856	0.438355
	115.741	0.820289	383.312	3078.63	850.932	38.1724	0.823571	147.845	2133.42	488.057	0.245563	0.218725	0.526217	0.37056	0.527731	0.430398
	128.048	0.775677	393.42	2690.33	886.295	36.5794	0.805029	131.32	1860.26	445.742	0.222904	0.287324	0.525012	0.389397	0.523966	0.427491
	96.55	0.808716	376.806	2916.76	850.182	30.8625	0.829257	106.072	2190.01	432.217	0.238553	0.231441	0.528744	0.375538	0.509891	0.428306
	127.043	0.792153	401.927	2791.9	879.086	29.9857	0.812497	170.899	2193.66	523.683	0.195604	0.258043	0.53354	0.378139	0.520771	0.428505
	88.7226	0.831205	387.173	2711.22	758.024	28.6861	0.826712	167.016	2469.81	546.58	0.250376	0.205344	0.586059	0.362179	0.500542	0.428964
	82.6263	0.796063	357.575	2610.69	792.966	22.596	0.804883	128.563	1993.26	479.447	0.214239	0.254288	0.551947	0.373399	0.517367	0.438893
	94.8497	0.824724	375.817	2846.77	776.142	30.1098	0.807443	150.903	2210.64	517.8	0.247773	0.218912	0.5702	0.363365	0.524115	0.433498
	76.29	0.78743	356.88	2621.97	809.712	28.0037	0.809258	148.573	1928.72	465.315	0.263266	0.264744	0.533549	0.379291	0.547702	0.428663
	91.9462	0.828037	394.334	2774.63	788.064	26.2903	0.813882	146.268	2034.53	464.759	0.229123	0.21153	0.564966	0.363453	0.528985	0.424634
	90.3665	0.835712	392.371	3018.16	795.41	23.8367	0.805599	163.321	2087.72	514.554	0.217555	0.206164	0.564062	0.356262	0.513382	0.431263
	77.5951	0.802879	427.586	2997.95	885.589	27.004	0.799401	155.499	2007.86	503.535	0.256743	0.250406	0.550369	0.370513	0.526684	0.428972
	113.155	0.825783	413.426	2939.39	830.092	32.7838	0.79832	145.19	1845.06	472.475	0.223744	0.220614	0.5571	0.366319	0.554194	0.428414
	71.4825	0.790634	490.152	3349.36	1027.92	25.5	0.839208	154.356	2269.37	461.323	0.262389	0.251611	0.504852	0.387385	0.524868	0.416869
	72.3333	0.785397	396.2	2725.6	865.936	20.5185	0.845944	139.466	2229.4	457.141	0.222881	0.254863	0.541005	0.383099	0.523153	0.428267
	75.6036	0.800017	396.164	2959.93	849.428	25.982	0.803889	192.351	2408.43	606.726	0.253641	0.254199	0.542925	0.368596	0.50298	0.431387
	86.0545	0.787891	403.489	2867.98	905.348	23.9208	0.809423	174.96	2096.05	506.518	0.215105	0.265589	0.527137	0.384733	0.545979	0.424862
	69.0541	0.801229	406.917	3099.85	891.721	17.8716	0.814987	171.813	2185.27	508.787	0.208475	0.247129	0.517841	0.376013	0.543909	0.421823
	64.5625	0.787722	409.977	2784.42	879.279	18.7042	0.824375	194.023	2411.23	528.073	0.230638	0.260144	0.550303	0.379689	0.526355	0.418947
test_2022_05_05_15_59	136.305	0.778625	342.317	2571.22	808.318	73.4305	0.742422	178.283	2184.43	678.201	0.357321	0.302114	0.522247	0.384883	0.455541	0.453109
test_2022_05_05_16_00	153.408	0.791312	335.141	2373.29	746.916	77.5714	0.76849	124.64	2165.69	593.153	0.336724	0.272548	0.549259	0.379418	0.452886	0.461447
	133.171	0.783675	382.458	2711.47	860.603	66.8875	0.759436	152.824	2233.33	641.133	0.340203	0.287387	0.52983	0.382929	0.445626	0.459042
	136.778	0.788531	386.63	2683.99	842.401	67.2384	0.762399	158.725	2301.82	656.99	0.332749	0.279925	0.537962	0.378847	0.45115	0.45365
	129.183	0.770644	385.919	2626.12	866.886	64.4817	0.764747	133.527	2133.08	593.421	0.352035	0.301508	0.525377	0.38755	0.42868	0.45776
	141.368	0.805432	357.012	2644.85	785.292	80.4916	0.732312	167.808	2261.3	719.069	0.372842	0.267357	0.546319	0.374179	0.432572	0.462877
	147.819	0.789733	356.147	2602.93	805.125	67.5301	0.746783	154.063	2218.39	666.003	0.325984	0.281823	0.532792	0.37935	0.450263	0.460395
	120.561	0.771885	341.546	2641.94	845.65	58.5826	0.753961	139.448	2213.98	632.923	0.344212	0.305441	0.515408	0.387526	0.444083	0.462585
	120.708	0.786268	349.81	2713.89	833.373	68.0674	0.748039	171.152	2223.16	670.82	0.366448	0.287058	0.511727	0.384421	0.441895	0.456354
	134.051	0.788741	379.157	2562.47	825.537	64.5641	0.758528	176.558	2185.93	648.741	0.336885	0.280896	0.535138	0.38214	0.465744	0.449677
	126.307	0.800972	337.419	2593.53	766.763	54.3678	0.749775	158.676	2140.87	635.237	0.306125	0.267944	0.539865	0.375523	0.466136	0.455246
	95.0878	0.782799	329.684	2641.67	811.686	63.8585	0.749848	190.471	2229.37	684.286	0.414703	0.292117	0.50358	0.385724	0.453502	0.452178
	127.742	0.798205	332.239	2627.86	770.846	48.8409	0.766538	179.856	2307.36	654.789	0.286477	0.264692	0.541034	0.374635	0.467029	0.449183
	146.427	0.773588	367.118	2650.02	856.941	79.8621	0.769332	152.732	2077.52	590.223	0.361423	0.29532	0.522671	0.386082	0.465941	0.450035
	117.272	0.813742	315.926	2491.68	703.805	42.3615	0.755406	174.722	2284.38	668.658	0.274453	0.248768	0.569108	0.368417	0.459516	0.450923
	125.166	0.796318	352.606	2474.96	765.506	52.1192	0.781723	146.695	2033.85	549.277	0.301917	0.261866	0.552487	0.376268	0.498068	0.446707
	149.804	0.763628	352.609	2656.09	881.717	66.6087	0.755674	147.662	2024.85	594.023	0.315946	0.315839	0.504652	0.393028	0.473087	0.454861
	110.117	0.794407	297.66	2266.55	680.96	52.1684	0.772517	154.004	2085.02	575.302	0.329151	0.267708	0.546737	0.373439	0.475909	0.443458
	147.735	0.810838	330.07	2550.69	737.661	64.1217	0.7436	185.201	2312.5	709.92	0.310227	0.255278	0.55131	0.372882	0.452949	0.453399
	108.585	0.786518	328.693	2567.89	791.564	125.667	0.756685	162.508	2146.07	633.602	0.496826	0.282639	0.526351	0.384245	0.472725	0.454067
	106.278	0.775514	353.044	2586.88	809.658	55.8722	0.768581	125.506	1913.11	527.85	0.366952	0.291426	0.533754	0.382332	0.490863	0.449505
	155.027	0.786206	360.908	2565.41	806.368	69.4185	0.785624	153.34	2243.53	589.738	0.310046	0.272878	0.537211	0.378971	0.464788	0.44855
	148.589	0.767671	353.044	2603.5	844.712	99.3333	0.75337	162.468	2091.47	627.747	0.381809	0.310782	0.510157	0.386731	0.478076	0.453503
	162.655	0.821062	333.153	2382.84	676.989	59.9417	0.781532	157.644	2094.3	563.785	0.27165	0.231708	0.594275	0.356301	0.489021	0.44254
	132.982	0.784942	323.711	2403.29	748.21	64.7758	0.783264	156.467	1942.77	527.853	0.334163	0.275442	0.542795	0.381016	0.510299	0.436671
	160.972	0.796076	299.949	2367.17	706.102	59.6099	0.778476	150.284	2105.34	565.448	0.272758	0.264742	0.554888	0.376844	0.472947	0.450324
	137.503	0.810091	326.455	2572.41	737.816	46.4138	0.794607	153.84	2253.67	561.395	0.260313	0.24174	0.552275	0.372513	0.470919	0.436242
	152.889	0.805188	393.228	2657.11	819.722	50.6732	0.754961	163.034	2128.02	619.614	0.261511	0.260698	0.550269	0.376733	0.469607	0.450801
	146.112	0.807483	353.172	2471.14	742.048	48.4831	0.795978	131.126	2246.71	546.008	0.2526	0.242538	0.567333	0.36596	0.454937	0.448967
	104.597	0.799153	359.107	2595.78	787.085	42.8953	0.780674	142.625	2266.52	594.334	0.302997	0.259074	0.552064	0.376431	0.468326	0.453054
	134.447	0.800617	389.998	2669.22	821.256	48.5367	0.797387	137.956	2170.38	532.74	0.277388	0.251731	0.555112	0.375663	0.47567	0.441714
	146.056	0.806378	364.306	2516.46	770.691	43.5421	0.787165	160.41	2340.07	612.268	0.239163	0.247216	0.564615	0.371857	0.459961	0.444939
	134.006	0.804886	382.904	2796.45	834.539	45.7453	0.779818	136.785	2241.17	585.101	0.27371	0.251771	0.530977	0.376333	0.450977	0.456019
	130.339	0.800038	368.672	2760.76	821.996	45.5397	0.788277	147.902	2314.59	575.549	0.280578	0.256526	0.52574	0.376707	0.45168	0.442942
	152.885	0.825246	362.229	2733.13	764.502	49.3438	0.767237	168.98	2252.92	632.945	0.245348	0.230021	0.565502	0.367001	0.460504	0.452027
	97.6291	0.785281	306.34	2197.89	693.973	74.0132	0.789598	156.746	2036.76	538.654	0.414858	0.272222	0.565852	0.373698	0.51357	0.435539
	120.664	0.777452	360.688	2673.59	856.226	53.8477	0.768817	190.68	2069.89	595.454	0.31309	0.290578	0.513369	0.387948	0.515878	0.436175
	111.767	0.791143	398.371	2733.12	857.393	47.375	0.775435	169.925	2064.23	577.58	0.303099	0.269275	0.525301	0.382216	0.519762	0.439305
	98.5467	0.809474	376.502	2682.94	795.738	40.4867	0.774171	212.97	2439.41	681.744	0.294336	0.24876	0.557843	0.371553	0.482711	0.440724
	131.403	0.794551	378.618	2608.85	822.339	55.9215	0.802019	159.351	2113.06	533.107	0.307082	0.256466	0.548082	0.379552	0.490137	0.436157
	115.953	0.815572	379.617	2645.46	777.4	36.3551	0.795054	180.984	2219.81	558.535	0.245085	0.236063	0.564679	0.367476	0.4816	0.430689
	117.099	0.784767	397.71	2822.43	894.81	43.4702	0.768917	185.889	2255.1	639.293	0.290916	0.283223	0.525595	0.388799	0.462686	0.44686
	105.901	0.758371	346.572	2376.44	803.375	49.4605	0.812979	166.405	2134.49	520.662	0.317799	0.298234	0.531803	0.385133	0.523372	0.427905
	115.477	0.798878	384.035	2864.81	858.115	31.6667	0.808999	166.098	2497.8	584.243	0.230671	0.248669	0.531441	0.373433	0.458303	0.436911
	109.82	0.803367	376.923	2756.13	821.261	39.145	0.808184	142.362	2239.15	525.355	0.270945	0.244347	0.54523	0.375157	0.488592	0.439796
	109.409	0.781192	344.119	2769.76	840.629	42.5354	0.75476	165.05	1810.56	546.025	0.28935	0.293779	0.506425	0.381791	0.523742	0.440232
	196.868	0.766429	399.272	2750.14	921.137	53.5537	0.780186	157.784	2045.42	558.831	0.2236	0.302231	0.499312	0.390151	0.517441	0.444466
	126.654	0.80955	404.664	2971.84	878.3	34.6029	0.797044	170.422	2061.89	532.47	0.214017	0.240309	0.550806	0.374796	0.499446	0.435093
	127.627	0.835625	380.916	2810.07	758.473	33.1972	0.815126	159.811	2208.85	526.877	0.212067	0.202325	0.579747	0.357317	0.505834	0.433416
	102.149	0.812635	376.004	2833.29	800.251	30.0198	0.799357	150.983	2128.01	518.903	0.243944	0.240047	0.554695	0.369431	0.476786	0.434875
	107.108	0.844301	393.806	3090.78	802.234	29.1529	0.821018	133.265	2154.24	468.853	0.22488	0.191966	0.569414	0.356965	0.505803	0.430544
	118.82	0.784099	345.326	2758.16	848.136	49.618	0.757856	132.524	1761.53	511.673	0.293839	0.288984	0.508587	0.384809	0.516009	0.44409
	127.85	0.812539	377	2959.28	843.245	35.6209	0.792995	149.946	2168.15	517.358	0.23124	0.239169	0.531022	0.37168	0.502217	0.433876
	165.209	0.79389	413.958	3072.68	937	32.6	0.779699	170.203	1992	529.338	0.16729	0.276201	0.51137	0.38179	0.521566	0.431095
	125.255	0.775593	402.746	2813.59	918.898	37.1939	0.792321	140.771	1874.72	482.859	0.240804	0.284758	0.515571	0.386722	0.504344	0.429818
	89.6298	0.814086	401.234	2866.48	830.349	27.1021	0.799769	139.247	1967.99	490.294	0.239869	0.233054	0.55171	0.369756	0.509969	0.43568
	101.097	0.825048	415.117	3002.9	842.273	36.9478	0.811188	151.233	2249.36	525.171	0.268384	0.217304	0.573479	0.365124	0.488654	0.43185
	107.751	0.820922	385.681	3050	841.027	32.6842	0.810025	155.762	2242.06	529.543	0.231322	0.223283	0.541918	0.368483	0.50167	0.436056
	110.796	0.791936	383.501	2689.98	841.396	27.4925	0.791151	170.443	2198.19	569.302	0.204995	0.265571	0.544285	0.377386	0.499536	0.435539
	114.866	0.820978	409.599	2918.13	845.154	38.6032	0.818901	164.411	2323.26	535.97	0.252807	0.220172	0.567786	0.368712	0.493227	0.431751
	102.593	0.821486	396.762	2885.5	806.803	32.593	0.830625	122.858	2070.61	430.547	0.230809	0.216734	0.558646	0.363343	0.524652	0.429451
	87.6699	0.82311	422.167	3040.58	864.37	22.5631	0.802208	138.94	1999.11	471.141	0.209572	0.225	0.541605	0.370059	0.506625	0.43379
	62.6774	0.805305	478.543	3932.74	1040.13	19.7151	0.823748	130.738	2395.16	500.388	0.247412	0.238453	0.53009	0.374006	0.481217	0.435278
	102.269	0.733491	479.941	3269.6	1170.95	24.9748	0.823664	138.598	2256.88	488.646	0.208287	0.324324	0.455894	0.402842	0.494937	0.428215
	75.6529	0.809319	458.63	3486.14	984.206	35.6612	0.797878	142.803	1911.71	482.982	0.30798	0.240918	0.520157	0.37464	0.544801	0.436187
	66.9497	0.790537	475.707	3469.32	1046.81	19.7421	0.80021	190.601	2200.87	543.436	0.236712	0.264334	0.509473	0.382227	0.508851	0.434051
	54.5625	0.782491	415.516	2991.86	925.805	19.6875	0.809491	148.664	2224.03	517.869	0.27061	0.272242	0.537128	0.379462	0.522915	0.431628
	90.6627	0.784235	388.542	2628.49	839.761	20.9759	0.801002	160.761	1887.88	477.706	0.193766	0.27246	0.562028	0.373458	0.542265	0.416807
	65.9463	0.792964	460.42	3390.1	1000.6	21.2732	0.792265	261.702	2256.38	631.504	0.246033	0.268043	0.51679	0.378063	0.545238	0.423562
	62.8611	0.770646	423.584	3318.06	968.217	20.4611	0.814258	169.953	2081.44	487.377	0.245895	0.285317	0.519832	0.385157	0.556171	0.419209
test_2022_05_05_16_02	123.187	0.771256	373.61	2411.41	806.815	71.8598	0.742593	144.351	2208.77	662.559	0.378904	0.309383	0.556517	0.383571	0.449685	0.461383
test_2022_05_05_16_04	141.427	0.789805	333.835	2440.96	764.845	70.9775	0.732165	173.929	2198.91	698.273	0.348746	0.290383	0.549198	0.381795	0.448597	0.459398
	104.802	0.789908	329.504	2574.57	784.972	49.7253	0.748415	186.917	2323.07	706.72	0.327621	0.28182	0.526873	0.383932	0.449448	0.453465
	101.14	0.816527	363.742	2589.36	744.373	58.0744	0.753518	147.5	2225.88	648.014	0.373576	0.243767	0.553414	0.370622	0.436358	0.45681
	134.341	0.825662	370.741	2596.28	744.425	67.5116	0.731774	188.616	2194.54	714.563	0.342844	0.239969	0.56838	0.36331	0.453537	0.457966
	114.402	0.776544	309.176	2157.33	692.56	63.4647	0.760926	154.769	2149.1	619.696	0.364475	0.295579	0.572481	0.373804	0.466086	0.455377
	142.647	0.778717	330.277	2164.85	724.405	71.5294	0.75172	198.311	2368.76	730.992	0.336938	0.29555	0.551626	0.380978	0.453611	0.455238
	117.352	0.798769	357.593	2494.24	767.112	58.331	0.754945	134.003	1980.13	576.816	0.340184	0.268246	0.553886	0.377034	0.449912	0.456321
	151.656	0.808426	360.317	2601.55	778.551	68.2222	0.760057	164.39	2288.68	661.343	0.317981	0.254056	0.544242	0.375352	0.468175	0.460921
	102.295	0.783589	362.331	2547.17	794.821	57	0.760164	140.335	2217.02	629.389	0.376385	0.286257	0.548962	0.37636	0.436013	0.457008
	100.896	0.796226	344.216	2481.3	753.17	47.5495	0.777577	162.951	2345.47	620.488	0.329221	0.266117	0.559615	0.372413	0.449211	0.447799
	121.008	0.832565	338.809	2487.78	681.549	62.124	0.760021	162.332	2208.46	648.355	0.355308	0.220935	0.583233	0.355967	0.463439	0.454035
	158.656	0.80656	364.767	2558.41	773.107	66.2699	0.764151	173.09	2239.81	647.807	0.299946	0.254171	0.545714	0.373991	0.45001	0.449782
	111.331	0.789041	333.995	2358.46	733.703	59.25	0.797237	143.06	2308.87	573.846	0.358603	0.265988	0.561564	0.372336	0.457102	0.44741
	154.872	0.753532	315.621	2419.38	823.885	72.4637	0.769718	158.535	2208.1	617.667	0.324386	0.321841	0.495663	0.400026	0.459981	0.450754
	106.33	0.79158	303.195	2044.81	645.637	49.4245	0.790275	160.226	2226.33	582.457	0.330038	0.265015	0.587784	0.365769	0.470203	0.442895
	119.89	0.769209	336.629	2624.66	850.966	57.1753	0.755865	151.247	2140.56	619.182	0.322523	0.308307	0.490163	0.392374	0.457627	0.456959
	122.61	0.777967	330.635	2479.95	791.971	67.6805	0.778598	129.722	2178.59	563.792	0.35824	0.287909	0.525748	0.383267	0.467851	0.45413
	139.156	0.793324	349.878	2467.36	769.53	64.8104	0.764604	130.418	2074.61	577.258	0.334525	0.27231	0.550948	0.37818	0.450411	0.457093
	145.929	0.804548	366.983	2546.22	780.469	60.0326	0.772651	144.836	2251.5	611.956	0.308129	0.254499	0.554625	0.374277	0.446579	0.455448
	147.654	0.761064	321.672	2293.9	775.911	70.9055	0.771693	157.334	2190.82	612.62	0.330145	0.311481	0.530262	0.390435	0.478973	0.451141
	112.979	0.774495	346.318	2368.65	781.828	56.2893	0.782153	133.863	2058.02	541.33	0.335395	0.290462	0.536233	0.384998	0.476269	0.452975
	127.189	0.747343	375.911	2529.85	889.855	56.0561	0.769627	156.112	2277.58	618.384	0.321167	0.332397	0.519497	0.396671	0.48259	0.451842
	118.006	0.759616	361.824	2791.26	923.877	66.2203	0.778234	166.686	2280.65	621.521	0.37419	0.309505	0.480935	0.396215	0.469427	0.445385
	122.217	0.77526	324.715	2249.46	748.363	51.9255	0.78062	163.401	2255.98	592.214	0.305401	0.290057	0.558797	0.381387	0.483261	0.444689
	121.214	0.788342	353.477	2299.7	747.487	46.5476	0.80249	190.269	2474.67	616.619	0.274423	0.265589	0.555041	0.375963	0.481123	0.437569
	85.0761	0.798164	368.63	2820.37	842.551	42.5217	0.804226	127.737	2201.47	519.297	0.35416	0.252484	0.515856	0.381388	0.45442	0.441824
	120.73	0.756154	360.041	2543.53	872.588	50.3822	0.777322	143.929	2082.75	563.692	0.301529	0.31443	0.51341	0.39556	0.490132	0.45154
	129.356	0.79614	353.236	2380.2	743.623	46.8283	0.775884	162.858	2273.04	605.518	0.277173	0.267277	0.572526	0.370235	0.46897	0.442686
	165.638	0.785943	345.738	2300.57	752.07	53.2416	0.801439	157.088	2118.08	527.794	0.246693	0.268389	0.556133	0.380397	0.513043	0.434465
	130.806	0.818737	351.33	2479.67	718.728	45.8837	0.799281	174.614	2196.96	563.115	0.264318	0.227396	0.574459	0.366319	0.517949	0.433656
	122.496	0.780972	339.31	2302.4	744.729	48.9078	0.773721	146.563	1952.47	533.158	0.305551	0.283125	0.552582	0.381092	0.494082	0.440446
	127.213	0.838557	386.197	2867.55	771.273	43.874	0.794499	163.931	2230.22	564.872	0.270225	0.204624	0.571679	0.360584	0.471142	0.442123
	105.239	0.784317	366.927	2643.12	814.658	45.7772	0.786037	158.491	2351	608.425	0.320458	0.277286	0.535815	0.377307	0.458982	0.448081
	120.733	0.82123	356.23	2529.99	725.313	42.8931	0.803098	145.394	2154.02	522.338	0.275956	0.22296	0.572186	0.364111	0.492327	0.438056
	95.7875	0.774297	363.19	2508.12	819.116	43.85	0.776978	163.337	2235.5	605.037	0.329047	0.294025	0.540277	0.382628	0.452215	0.444244
	109.99	0.822271	351.74	2570.78	721.64	49.936	0.795606	136.776	2094.67	524.321	0.316123	0.225154	0.575015	0.362746	0.492178	0.441493
	127.736	0.811783	336.533	2264.43	683.354	43.5064	0.772852	160.854	2279.52	625.787	0.263763	0.244217	0.595549	0.363639	0.451736	0.45029
	111.444	0.803023	428.719	2952.19	908.426	49.4667	0.784905	140.824	2187.77	571.518	0.317484	0.252652	0.519698	0.37999	0.488379	0.447647
	102.81	0.781637	350.058	2646.12	826.207	45.0847	0.79513	137.811	2110.51	526.418	0.31081	0.27514	0.520536	0.385002	0.495739	0.442778
	123.882	0.794403	341.4	2321.14	729.472	43.6419	0.797928	142.246	2165.47	538.433	0.266598	0.259051	0.574576	0.370759	0.489075	0.440648
	116.426	0.77234	303.375	2389.24	758.785	127.653	0.788191	190.603	1975.42	562.123	0.494271	0.289138	0.530392	0.388664	0.54858	0.432407
	82.5514	0.809517	395.556	2944.68	851.257	39.7196	0.786717	151.192	2255.73	591.144	0.338638	0.243401	0.524951	0.373533	0.483057	0.452794
	80.0244	0.775485	384.056	2706.92	876.517	58.5366	0.783941	194.229	2023.91	572.676	0.393625	0.288774	0.526807	0.387144	0.526826	0.433417
	116.151	0.771226	382.143	2707.79	880.074	43.2466	0.808086	160.585	2186.94	530.961	0.272053	0.283244	0.516364	0.387725	0.503891	0.43309
	136.851	0.807023	415.452	3072.91	916.476	41.702	0.787503	151.647	2038.98	529.942	0.238952	0.246913	0.511942	0.379113	0.506332	0.434958
	122.239	0.775058	371.161	2480.56	833.496	37.4771	0.81792	157.071	2296.62	528.987	0.243914	0.275698	0.545551	0.387949	0.494012	0.432318
	97.0759	0.796063	372.323	2432.3	763.752	34.1353	0.805872	116.16	1934.01	453.786	0.267067	0.253597	0.568828	0.370596	0.502262	0.437458
	91.0246	0.818129	379.299	2859.18	814.844	35.6639	0.768279	203.857	2410.25	682.312	0.290732	0.238827	0.547227	0.369162	0.488814	0.44703
	98.2105	0.804485	349.645	2684.4	782.386	33.203	0.80315	140.988	2087.68	507.566	0.26335	0.244462	0.54877	0.374934	0.479962	0.438724
	114.187	0.797129	370.33	2689.76	813.07	40.9883	0.797995	148.847	2048.09	509.946	0.280131	0.256292	0.542601	0.37509	0.50935	0.437879
	102.362	0.798322	417.864	2861.78	887.757	43.6688	0.798726	154.787	2101.91	527.087	0.296652	0.253616	0.532877	0.379228	0.511156	0.435989
	125.994	0.770055	387.449	2822.28	923.974	46.7267	0.759905	182.3	1987.55	583.27	0.266903	0.306363	0.50366	0.392283	0.519902	0.439175
	89.4038	0.78958	388.272	2729.03	853.319	28.6868	0.800184	150.461	1910.07	480.904	0.250387	0.265387	0.54455	0.381599	0.532507	0.426504
	81.7366	0.798536	388.883	3211.99	883.223	31.839	0.787902	197.013	2207.71	583.584	0.286418	0.260706	0.53657	0.379883	0.514063	0.433113
	92.6893	0.81256	438.884	3082.23	887.875	31.835	0.789923	133.536	1852.51	472.738	0.252519	0.240503	0.555128	0.373035	0.521754	0.438847
	72.2222	0.786019	359.645	2772.65	825.614	27.1795	0.793714	166.365	2073.52	547.641	0.277466	0.270828	0.542401	0.377321	0.537252	0.433485
	87.888	0.789676	386.513	2738.17	845.748	33.7261	0.797566	146.42	2012.86	509.956	0.274971	0.265583	0.534622	0.378505	0.520041	0.430456
	104.669	0.787374	396.353	2946.49	919.074	40.9793	0.799015	163.196	2075.23	529.874	0.274722	0.268085	0.508745	0.385576	0.525884	0.433193
	77.1818	0.769526	374.099	2553.1	843.603	30.5167	0.794811	159.415	1961.69	510.974	0.292397	0.292632	0.541155	0.386382	0.519604	0.432022
	63.6711	0.794645	368.95	2916.12	843.066	44.9211	0.793321	183.237	2097.39	558.213	0.401801	0.261287	0.511668	0.376682	0.544365	0.428874
	61.7381	0.818553	407.805	3022.93	865.225	33.0476	0.769241	178.373	1954	557.305	0.352459	0.237721	0.526289	0.374887	0.52614	0.432589
	95.15	0.798158	403.264	2982.37	910.716	35.3375	0.786689	163.427	2032.64	538.135	0.274447	0.257722	0.523684	0.379596	0.526965	0.433575
	68.5052	0.806308	385.849	2877.26	832.067	21.7938	0.800989	192.387	2482.29	606.031	0.243342	0.243955	0.558757	0.372372	0.478132	0.430524
	68.086	0.768795	368.57	2893.68	918.774	29.3548	0.801228	140.98	1896.28	463.85	0.328843	0.293758	0.501749	0.392719	0.530953	0.427997
	68.6241	0.811617	419.668	3099.71	884.976	23	0.782764	174.274	2000.85	531.806	0.256267	0.245141	0.547481	0.373662	0.511956	0.434497
	74.747	0.847313	475.894	3504.04	904.806	25.5904	0.794709	191.135	2230.52	593.686	0.260117	0.195007	0.546921	0.360432	0.540262	0.438148
	56.7574	0.791485	394.437	3014.1	881.249	24.8521	0.825984	187.886	2462.51	554.993	0.305977	0.255448	0.524445	0.382524	0.490205	0.423441
	66.3061	0.793554	412.27	2770.42	876.172	22.4082	0.786327	140.877	1921.35	479.009	0.255925	0.270997	0.550514	0.383773	0.518208	0.442919
	61.0952	0.812086	401.377	3455.02	909.054	29.9524	0.812692	178.463	2087.95	516.062	0.320955	0.232472	0.506286	0.374643	0.563934	0.422859
	93.7419	0.807272	392.612	3054.1	885.837	29.543	0.799574	162.122	2113.72	531.067	0.243932	0.243308	0.525953	0.376714	0.522071	0.43084
	71.5422	0.813232	451.658	3407.14	972.945	25.3735	0.805229	133.564	2037.66	479.787	0.263551	0.233174	0.51757	0.370452	0.497886	0.436238
	62.9158	0.758689	413.398	2806.91	932.009	38.1634	0.79232	183.585	2064.45	556.703	0.389076	0.306823	0.50456	0.391682	0.542709	0.429781
	60.8524	0.793506	415.472	2947.07	902.651	23.8967	0.801386	195.639	2296.29	564.94	0.282116	0.259786	0.533327	0.378312	0.529783	0.424866
	69.8088	0.804622	425.185	2958.67	870.872	23.8008	0.807939	170.62	2074.73	505.485	0.254354	0.243186	0.551433	0.37104	0.538923	0.422825
	73.1579	0.802375	442.624	3303.86	951.489	24.3977	0.794944	157.866	1973.25	510.311	0.253519	0.252202	0.510522	0.376005	0.534133	0.431709
	64.3214	0.794763	397.575	2914.94	874.725	27.1627	0.824082	165.965	2062.5	466.336	0.291566	0.2516	0.526199	0.377317	0.553105	0.418778
	80.2424	0.782824	395.146	2818.9	888.453	26.6848	0.799984	194.901	2209.49	550.341	0.25175	0.274311	0.529543	0.381681	0.543243	0.421276
	65.2685	0.805133	459.524	3209.34	960.243	19.6381	0.81884	157.167	2327.51	503.212	0.234893	0.242	0.531715	0.378592	0.505165	0.422794
	75.2372	0.763214	467.395	3166.37	1050.44	31.1953	0.783515	168.308	1914.93	523.387	0.296144	0.30716	0.492053	0.395191	0.540211	0.427784

## Sheet: M1
	NADH.Intensity	NADH.a1	NADH.t1	NADH.t2	NADH.FLIM	FAD.Intensity	FAD.a1	FAD.t1	FAD.t2	FAD.FLIM	Redox.Ratio	FLIRR	NADH.G	NADH.S	FAD.G	FAD.S
test_2022_05_06_17_07	202.841	0.760064	330.322	2778.54	907.468	76.692	0.716735	249.522	2332.34	813.332	0.274676	0.338341	0.439771	0.400032	0.459357	0.452838
test_2022_05_06_17_09	217.654	0.776135	325.911	2659.84	840.613	94.3386	0.720515	264.001	2255.55	791.107	0.302276	0.313613	0.471212	0.394365	0.48826	0.446835
	244.039	0.746014	326.545	2628.82	904.367	105.91	0.718601	268.015	2293.93	817.679	0.303281	0.355885	0.444863	0.404844	0.479552	0.450607
	239.898	0.768433	330.965	2824.99	902.483	102.66	0.707746	285.163	2340.74	863.071	0.29908	0.329848	0.441576	0.398395	0.474299	0.454485
	213.708	0.718677	336.858	2855.91	1038.77	84.4519	0.701915	268.358	2265.85	837.014	0.283465	0.405567	0.399786	0.412709	0.467739	0.454024
	252.993	0.741914	328.85	2860.51	974.028	115.619	0.704636	249.914	2216.73	806.494	0.311605	0.369532	0.418023	0.407065	0.469924	0.453188
	278.576	0.767883	337.614	2646.06	869.276	143.122	0.723106	235.895	2198.22	765.38	0.339197	0.322909	0.470399	0.396205	0.487484	0.452078
	236.277	0.715308	327.717	2767.94	1012.42	131.099	0.718488	259.078	2311.66	817.496	0.356698	0.398927	0.41135	0.413969	0.475902	0.452094
	264.864	0.74479	320.517	2683.04	917.069	151.242	0.714233	242.768	2194.64	787.593	0.366883	0.360256	0.431202	0.4059	0.476395	0.453315
	250.809	0.758146	319.79	2768.08	903.76	123.416	0.726582	224.62	2267.85	767.784	0.3272	0.335459	0.440915	0.401669	0.467672	0.453495
	218.565	0.732001	334.929	2732.56	969.365	112.221	0.727385	261.999	2365.6	814.504	0.333709	0.371068	0.427225	0.408571	0.469107	0.450762
	233.327	0.76281	343.815	2698.01	890.649	100.485	0.713845	244.15	2222.02	791.794	0.298565	0.334532	0.461615	0.397062	0.479158	0.454324
	237.833	0.715302	344.541	2825.73	1040.62	91.5846	0.714168	241.885	2180.75	776.985	0.281708	0.401345	0.411773	0.41246	0.48179	0.454484
	212.336	0.769498	339.001	2748.37	892.269	85.6523	0.715579	257.105	2326.83	826.045	0.288551	0.325514	0.462339	0.395542	0.471729	0.454493
	197.269	0.774894	331.651	2620.98	837.384	76.5382	0.72903	237.607	2253.1	763.971	0.279468	0.310855	0.469508	0.393628	0.473963	0.451734
	246.333	0.781722	302.853	2516.52	783.111	92.9284	0.724003	271.875	2297.55	806.971	0.276286	0.303697	0.481649	0.390817	0.496916	0.449122
	231.473	0.649539	360.265	3071.84	1305.38	100.211	0.701368	294.986	2509.66	940.147	0.298806	0.504716	0.354277	0.427186	0.455756	0.458123
	183.754	0.773732	343.135	2587.17	840.63	77.3484	0.746824	263.809	2268.69	746.424	0.300775	0.305299	0.494277	0.39136	0.515154	0.439496
	190.339	0.751458	335.528	2630.6	895.562	82.0793	0.753027	265.473	2275.25	739.123	0.305829	0.332065	0.461705	0.401537	0.517411	0.43819
	200.587	0.796283	321.742	2424.15	740.954	82.557	0.765521	274.625	2060.59	668.408	0.29411	0.268304	0.527645	0.380563	0.558963	0.425491
	237.414	0.759834	358.447	2822.95	944.143	74.6917	0.713702	262.008	2324.43	816.025	0.240104	0.340654	0.449686	0.399677	0.475093	0.449363
	226.91	0.774877	333.422	2775.83	875.307	76.648	0.722212	264.831	2195.28	774.775	0.252391	0.314901	0.45463	0.394794	0.501137	0.446618
	206.07	0.75328	364.267	2789.28	952.323	69.6006	0.764253	256.258	2293.79	712.916	0.255315	0.324186	0.458601	0.400733	0.512926	0.436368
	279.081	0.777206	344.589	2688.89	859.218	91.6515	0.739932	282.237	2256.26	774.56	0.246746	0.303226	0.481461	0.392047	0.508549	0.44234
	238.44	0.796418	326.43	2643.71	791.519	75.6908	0.737349	308.764	2419.04	824.607	0.242324	0.279265	0.489	0.385196	0.503481	0.442192
	228.758	0.771628	329.56	2696.14	863.094	81.1187	0.755833	287.173	2387.63	770.304	0.260502	0.305657	0.464268	0.395063	0.510138	0.435998
	216.122	0.804285	337.491	2626.08	780.413	59.0305	0.755703	265.729	2265.3	725.259	0.215894	0.261131	0.511187	0.379814	0.520172	0.436292
	234.534	0.782005	353.511	2774.83	872.979	84.9472	0.738522	254.262	2140.14	727.103	0.266679	0.299135	0.474323	0.391381	0.51101	0.442877
	171.667	0.743503	361.813	2797.8	972.456	65.7481	0.734271	251.12	2043.02	694.046	0.277851	0.354619	0.446155	0.403676	0.52787	0.438477
	213.459	0.814956	359.601	2610.77	770.457	71.2491	0.751043	242.859	2167.2	690.931	0.247919	0.249458	0.538379	0.372876	0.51884	0.435901
	187.997	0.773073	341.599	2538.51	825.707	72.8105	0.765114	300.3	2396.17	764.453	0.28419	0.299764	0.497408	0.391062	0.529596	0.432735
	166.748	0.783162	342.382	2497.76	798.827	68.4513	0.753617	309.433	2302.3	762.019	0.29975	0.291759	0.506616	0.386263	0.541583	0.432633
	206.884	0.804665	348.826	2600.93	779.703	75.9502	0.765157	281.355	2239.71	716.202	0.273446	0.255838	0.520369	0.379124	0.535247	0.430669
	191.772	0.813117	355.603	2589.53	764.797	60.2448	0.76659	284.604	2316.21	720.944	0.241938	0.246015	0.543067	0.371177	0.535575	0.428645
	149.442	0.772537	359.374	2643.21	853.981	63.0584	0.756964	245.986	1970.02	637.755	0.300937	0.303108	0.504342	0.388272	0.565459	0.424611
	178.64	0.833063	367.139	2574.97	728.744	57.4973	0.775573	268.58	2277.29	675.122	0.242632	0.216038	0.575103	0.361991	0.561191	0.426156
	151.395	0.84313	382.948	2661.18	730.338	44.5231	0.760711	268.361	2384.81	731.113	0.23111	0.209209	0.588849	0.357383	0.522978	0.435729
	160.477	0.784264	384.57	2917.58	919.279	61.1577	0.736541	251.768	2039.71	682.595	0.277546	0.295808	0.476684	0.389068	0.551971	0.434735
	141.244	0.837888	420.264	2797.77	795.055	37.9606	0.742674	282.35	2397.68	754.315	0.211741	0.224291	0.57632	0.360396	0.510719	0.436908
	101.685	0.830736	422.952	2848.68	816.633	22.458	0.781147	235.601	2493.75	661.671	0.197584	0.21901	0.576752	0.359345	0.507661	0.434029
	123.574	0.839284	443.941	3001.81	845.962	40.3688	0.782531	260.094	2192.38	639.13	0.254636	0.206187	0.563927	0.362658	0.576204	0.421315
	193.838	0.749846	391.181	2745.31	965.658	64.5333	0.758281	276.847	2222.24	717.175	0.253066	0.333749	0.476429	0.399454	0.539177	0.434091
	191.796	0.79731	357.933	2710.79	833.339	53.0355	0.744156	243.006	1946.86	652.951	0.220029	0.275927	0.514352	0.380717	0.551443	0.434773
	170.332	0.753728	378.555	2988.91	1003.26	53.7924	0.733473	292.657	2336.75	783.917	0.244496	0.341361	0.45274	0.399712	0.517312	0.440191
	149.918	0.754377	373.691	2943.92	995.29	50.7835	0.738267	321.924	2457.75	827.649	0.256923	0.337445	0.449166	0.401105	0.512323	0.439638
	130.129	0.796837	372.812	2799.82	848.76	38.8175	0.753286	261.247	2158.23	681.152	0.240032	0.2773	0.511125	0.382253	0.547431	0.430262
	184.861	0.809736	369.478	2860.76	832.949	54.4549	0.778149	242.428	2087.67	628.84	0.227954	0.245809	0.507061	0.378723	0.554468	0.42579
	205.533	0.803248	333.055	2624.74	775.84	68.5958	0.745389	268.818	2252.43	748.857	0.249887	0.26609	0.504563	0.381314	0.512812	0.440679
	243.087	0.793333	319.14	2674.34	795.945	76.1537	0.732263	268.505	2294.41	778.982	0.239893	0.285997	0.483419	0.386716	0.492486	0.445532
	281.655	0.808055	353.993	2592.87	777.636	80.6491	0.725902	267.711	2235.03	764.803	0.223533	0.267795	0.518563	0.378106	0.496925	0.44122
	199.575	0.808785	351.782	2850.58	823.967	61.8793	0.72477	246.045	1965.3	690.643	0.237093	0.266277	0.478174	0.381523	0.536976	0.440389
test_2022_05_06_17_11	226.397	0.782187	353.541	2824.64	886.367	113.135	0.738014	254.297	2381.99	794.359	0.336761	0.297696	0.485837	0.388969	0.467896	0.446682
test_2022_05_06_17_13	222.629	0.765379	339.04	2837.65	918.146	128.973	0.741062	230.396	2057.01	692.382	0.365256	0.318403	0.45711	0.397996	0.505117	0.445076
	207.241	0.757002	372.499	3073.94	1014.38	106.356	0.752784	269.727	2271.27	747.361	0.33744	0.324517	0.443218	0.398316	0.506211	0.440347
	195.925	0.763502	366.763	3047.04	991.64	115.709	0.751521	218.785	2207.62	699.116	0.363758	0.315558	0.448088	0.396776	0.487042	0.445649
	220.854	0.788931	365.53	2897.42	894.244	123.844	0.761557	250.298	2199.57	704.03	0.354461	0.277981	0.488333	0.387131	0.508447	0.440144
	235.887	0.789505	379.087	2894.4	905.26	108.258	0.754044	242	2150.56	699.527	0.316254	0.279617	0.486298	0.38812	0.501865	0.442119
	233.639	0.786831	362.126	2822.25	881.055	114.912	0.758722	274.806	2215.35	721.7	0.327508	0.282458	0.49193	0.386571	0.526664	0.436664
	255.092	0.781187	392.426	2872.29	925.791	103.561	0.753275	241.008	2181.92	701.998	0.290554	0.291714	0.493069	0.389886	0.51047	0.440563
	227.844	0.805313	379.942	2787.6	840.195	93.3859	0.758459	233.195	2159.19	678.83	0.290003	0.258344	0.519357	0.378579	0.516296	0.438884
	187.227	0.801568	377.222	2792.51	853.773	75.5761	0.744754	196.959	2213.43	692.029	0.287762	0.268361	0.529876	0.376286	0.460263	0.45135
	215.858	0.811427	379.988	2629.15	799.646	89.6	0.752709	196.614	2340.12	714.352	0.284713	0.250406	0.55215	0.371436	0.454555	0.451276
	213.834	0.791115	357.814	2926.43	886.58	90.6985	0.747934	251.495	2171.83	712.535	0.297592	0.280856	0.482805	0.385038	0.512281	0.4403
	227.94	0.738398	398.972	2947.16	1056.97	91.1032	0.761841	243.443	2222.46	692.494	0.284804	0.346732	0.451979	0.404919	0.508729	0.436999
	224.239	0.727868	397.313	3000.87	1097.12	86.2242	0.765952	235.105	2331.66	699.513	0.276688	0.356789	0.435214	0.407369	0.495507	0.437497
	196.898	0.764895	384.103	2997.87	987.897	83.0777	0.747006	250.035	2147.28	706.733	0.299691	0.317826	0.459355	0.397033	0.518336	0.440205
	190.555	0.79021	380.022	2851.42	890.248	69.2588	0.757682	241.475	2228.42	706.939	0.264653	0.277669	0.496591	0.385239	0.503979	0.441656
	181.395	0.778544	378.659	2805.09	902.963	79.6421	0.762433	238.424	2183.72	683.627	0.307774	0.293046	0.490111	0.391095	0.512556	0.440104
	187.849	0.770414	391.632	2920.61	959.113	74.7371	0.771078	244.381	2123.2	651.128	0.284851	0.300713	0.484885	0.39246	0.540319	0.43017
	226.449	0.769508	387.799	2960.14	974.417	125.665	0.779596	205.268	1983.12	588.132	0.354136	0.296255	0.467782	0.395647	0.539384	0.431752
	210.176	0.815533	402.094	2867.81	844.312	68.1442	0.77019	231.019	2166.43	660.142	0.247088	0.241509	0.53318	0.373816	0.506289	0.439128
	196.387	0.809054	389.176	2877.93	853.29	65.2847	0.770113	250.432	2274.97	686.709	0.251658	0.249776	0.527175	0.376449	0.516075	0.432773
	166.439	0.807347	374.189	2712.19	815.401	75.3904	0.79467	215.117	2157.35	592.047	0.311502	0.24407	0.530377	0.376129	0.549808	0.4251
	184.054	0.751355	366.178	2820.1	965.056	91.2708	0.772888	202.11	1967.9	591.446	0.333633	0.323328	0.465439	0.400322	0.526424	0.43413
	156.969	0.781487	330.097	2378.81	765.538	78.6367	0.772521	231.16	2231.72	666.49	0.337419	0.283789	0.53044	0.383507	0.506562	0.435745
	176.867	0.826607	382.375	2746.09	784.25	65.8894	0.789519	253.634	2161.64	628.874	0.272421	0.221184	0.556423	0.366575	0.558852	0.422788
	176.465	0.820202	378.543	2782.94	804.208	57.0665	0.789396	231.574	2161.74	618.458	0.24967	0.228825	0.54663	0.370404	0.548198	0.427127
	189.35	0.790273	422.343	3135.52	979.082	68.6763	0.778305	232.419	2082.44	622.3	0.271437	0.271174	0.481248	0.386841	0.540603	0.427248
	179.617	0.802561	401.57	3053.8	907.417	58.785	0.789149	237.704	2052.07	598.72	0.249324	0.251502	0.504397	0.380665	0.56432	0.42232
	219.256	0.810752	399.074	2975.62	878.398	76.5819	0.772173	226.85	2006.67	615.484	0.260375	0.246661	0.518879	0.377256	0.547995	0.43226
	158.362	0.784411	403.153	2888.05	922.029	55.0031	0.782505	196.202	2172.7	608.64	0.262285	0.277984	0.512331	0.385987	0.505496	0.437797
	147.65	0.785509	418.988	3051.53	972.31	44.9175	0.77673	268.562	2283.77	678.205	0.237227	0.278653	0.494968	0.387165	0.535569	0.425624
	186.66	0.773355	424.521	2945.82	979.341	56.5957	0.763172	221.579	2048.17	634.212	0.235171	0.300019	0.497591	0.391541	0.532205	0.434528
	150.897	0.793336	450.037	3254.64	1011.07	44.4626	0.791388	228.831	2137.36	590.339	0.233666	0.262606	0.495023	0.384163	0.551095	0.421362
	145.696	0.804019	405.331	2968.44	894.29	56.6244	0.802641	272.707	2303.13	643.408	0.28242	0.247222	0.511152	0.379873	0.55856	0.415402
	200.296	0.820757	401.631	2905.2	842.514	57.378	0.774938	227.365	2102.81	621.989	0.226654	0.232382	0.537284	0.371809	0.537756	0.430313
	171.427	0.802809	399.07	2991.5	896.987	61.3873	0.770037	236.416	2061.81	630.087	0.268831	0.258044	0.514645	0.380941	0.537437	0.429371
	164.25	0.810356	399.423	2883.79	856.966	48.2267	0.792713	273.293	2235.64	652.432	0.23205	0.241178	0.526181	0.373886	0.559457	0.421367
	130.489	0.825157	399.87	2798.76	808.427	34.1362	0.780277	231.38	2191.77	621.711	0.214372	0.225487	0.557851	0.366471	0.523208	0.430246
	97.25	0.837059	436.233	3504.97	905.446	29.7606	0.801782	242.835	2277.54	601.912	0.245993	0.204628	0.534638	0.362343	0.577607	0.423411
	103.633	0.831852	462.092	3185.6	904.617	23.95	0.792685	188.576	2398	575.742	0.196269	0.218667	0.561994	0.367157	0.505271	0.425798
	92.8761	0.838575	427.405	3455.06	877.383	30.8805	0.815983	235.411	2143.67	543.448	0.255614	0.199988	0.536844	0.361598	0.587491	0.404494
	129.848	0.812487	439.676	3074.27	916.801	31.3401	0.814775	205.016	2209.45	542.094	0.19594	0.232188	0.536444	0.37533	0.564563	0.414252
	130.189	0.77501	431.103	3250.98	1050.49	42.6368	0.805434	201	2087.12	537.715	0.253231	0.281287	0.468047	0.391383	0.566572	0.41749
	193.405	0.742477	407.959	2850.04	1026.6	55.9124	0.761863	202.537	1941.6	576.847	0.229291	0.345366	0.471622	0.402779	0.544216	0.426032
	169.806	0.825527	399.879	3010.77	849.279	52.0362	0.773547	221.615	1924.62	580.152	0.240396	0.22785	0.535479	0.371407	0.576832	0.424998
test_2022_05_06_17_15	149.207	0.794045	316.385	2672.36	788.555	85.8662	0.757988	218.234	2163.74	673.058	0.371205	0.274616	0.491446	0.385079	0.504579	0.442982
test_2022_05_06_17_17	153.924	0.793011	309.303	2586.18	767.417	90.581	0.764158	213.039	2174.85	659.549	0.374112	0.272263	0.483433	0.385883	0.490799	0.441903
	157.261	0.805767	297.076	2492.8	707.693	83.9963	0.76209	218.327	2111.32	656.486	0.350324	0.255648	0.515577	0.378034	0.509212	0.440757
	189.068	0.790175	307.484	2730.83	805.983	94.5352	0.773487	220.268	2172.77	649.132	0.332799	0.273194	0.473264	0.389891	0.512278	0.436861
	197.855	0.820805	304.19	2413.24	675.313	105.763	0.747755	207.366	2098.76	672.731	0.349522	0.240618	0.532734	0.370313	0.503511	0.446937
	127.898	0.80557	321.165	2631.57	748.601	72.4476	0.774264	195.264	2089.79	609.924	0.370363	0.252477	0.507318	0.377282	0.507777	0.43944
	200.718	0.818948	287.469	2313.45	646.302	89.7179	0.774401	232.513	2275.42	676.026	0.311121	0.235337	0.555864	0.36957	0.506824	0.43662
	195.997	0.761008	306.587	2613.19	849.465	89.8363	0.779067	236.792	2174.65	645.167	0.316779	0.307738	0.452908	0.40052	0.517243	0.431078
	177.5	0.778123	306.057	2566.83	794.15	104	0.766982	257.321	2245.04	701.847	0.369533	0.291283	0.475407	0.392973	0.510448	0.436261
	169.698	0.775243	284.925	2568.33	788.41	103.258	0.736234	234.39	2065.08	697.466	0.379286	0.30845	0.476448	0.395531	0.510767	0.445681
	192.06	0.801892	341.284	2750.83	808.722	94.2571	0.752431	215.666	2227.82	691.652	0.332784	0.264577	0.486617	0.384317	0.485825	0.444954
	193.23	0.808831	304.093	2440.39	701.079	107.472	0.76222	219.624	2088.72	649.638	0.359009	0.25174	0.533079	0.3754	0.511417	0.438231
	195.243	0.790037	309.684	2560.32	768.761	123.189	0.753906	221.066	2148.92	681.882	0.384042	0.279947	0.491856	0.387228	0.500004	0.444626
	201.134	0.769892	327.036	2568.28	826.674	86.5609	0.760993	213.047	2032.56	628.973	0.305346	0.304519	0.482567	0.393039	0.51596	0.437991
	179.37	0.785236	309.04	2351.86	743.028	117.137	0.780376	194.904	2081.83	607.558	0.391437	0.279143	0.506938	0.384247	0.501443	0.43393
	154.581	0.753073	324.612	2767.01	913.208	91.125	0.771303	208.018	2087.84	623.075	0.373983	0.320961	0.44182	0.402873	0.509443	0.436905
	188.428	0.814246	301.18	2196.26	648.147	89.027	0.773844	218.951	2143.71	636.717	0.324701	0.241442	0.56149	0.366503	0.515914	0.435402
	174.826	0.789088	318.446	2688.65	805.245	96.1129	0.76027	196.079	2055.42	628.587	0.358257	0.277697	0.482422	0.38756	0.502578	0.443772
	126.622	0.799303	301.162	2285.71	682.624	63.7086	0.776006	218.651	2089.76	616.022	0.344571	0.260162	0.539282	0.376313	0.527852	0.432774
	134.042	0.826431	305.001	2308.69	643.097	65.1569	0.777292	173.397	2080.4	578.878	0.331196	0.224585	0.574943	0.361841	0.499052	0.44127
	201.158	0.810294	317.023	2488.17	718.761	87.8933	0.762205	209.943	2123.64	654.111	0.308124	0.250084	0.528757	0.376208	0.491659	0.444021
	167.569	0.76572	323.473	2781.58	884.301	65.3548	0.781542	197.04	2104.68	595.964	0.283981	0.302716	0.44798	0.398342	0.515824	0.435815
	153.622	0.8057	320.228	2614.67	753.294	48.1501	0.782259	200.3	2118.88	599.121	0.248281	0.249917	0.519726	0.378995	0.511589	0.436095
	162.654	0.750374	331.034	2715.29	906.582	81.3938	0.778193	198.755	1939.57	568.634	0.342422	0.322663	0.450232	0.402662	0.527941	0.432267
	155.389	0.807847	327.464	2345	702.287	65.5997	0.788502	190.938	2131.71	584.996	0.305484	0.244804	0.556681	0.373385	0.510396	0.434294
	150.791	0.770809	337.771	2773.77	884.286	81.1149	0.780334	219.588	1999.34	594.024	0.347098	0.294649	0.470791	0.395061	0.540499	0.428009
	150.957	0.788937	296.432	2278.74	702.016	74.3408	0.775055	251.192	2051.77	641.175	0.335674	0.273392	0.519144	0.381491	0.56775	0.428535
	124.14	0.793212	293.403	2315.92	693.951	93.5428	0.779225	252.493	2064.07	628.192	0.396778	0.266577	0.535323	0.379124	0.566936	0.423523
	164.149	0.804304	341.868	2443.78	742.235	80.0314	0.777634	254.007	2019.72	629.055	0.337581	0.2527	0.53944	0.376768	0.5767	0.424899
	129.429	0.798147	305.07	2361.62	702.645	71.123	0.795928	230.097	2136.66	595.056	0.343162	0.255502	0.539806	0.377402	0.551987	0.422263
	156.484	0.810467	321.102	2457	713.99	88.5032	0.77686	198.787	2002.32	582.238	0.349038	0.245149	0.541392	0.37283	0.532221	0.430962
	141.538	0.767439	347.983	2530.1	835.436	62.5058	0.791427	214.081	2124.99	587.646	0.310452	0.294749	0.50155	0.391902	0.546826	0.423736
	107.04	0.818071	318.323	2436.47	688.125	42.1033	0.805995	180.492	2012.97	510.275	0.2879	0.225497	0.562361	0.366157	0.528996	0.419751
	168.508	0.792337	343.805	2559.74	787.547	69.8725	0.776637	229.81	2033.51	610.507	0.302928	0.268941	0.518375	0.381961	0.55212	0.428099
	179.903	0.785837	363.748	2618.43	836.668	68.6387	0.776314	209.137	2020.07	590.866	0.282671	0.277135	0.500499	0.387663	0.530295	0.431588
	124.516	0.798075	337.954	2640.87	784.604	67.5461	0.7898	222.673	2002.91	573.571	0.348177	0.257445	0.50846	0.381835	0.565897	0.422002
	145.645	0.820121	324.823	2566.09	714.561	60.6068	0.78921	195.886	1967.01	546.736	0.295988	0.22961	0.544824	0.368881	0.551267	0.425323
	163.515	0.802579	356.774	2714.35	809.891	73.4697	0.781632	215.777	1963.28	575.226	0.311648	0.25464	0.510316	0.381441	0.565138	0.423487
	148.135	0.819021	349.961	2625.73	750.711	69.3209	0.785542	212.041	1919.17	559.814	0.322401	0.23119	0.54408	0.372198	0.582261	0.422679
	163.835	0.798	382.826	2809.24	858.556	77.6089	0.781072	245.225	2017.29	611.329	0.329295	0.260764	0.50855	0.381904	0.562367	0.424473
	137.034	0.793953	337.4	2703.25	812.835	58.0745	0.789858	224.627	2083.61	587.637	0.299742	0.262688	0.503097	0.384857	0.555183	0.422084
	137.795	0.798295	337.129	2581.52	775.17	52.5652	0.780912	214.56	2117.72	601.263	0.273142	0.260517	0.520876	0.380027	0.533963	0.431306
	196.912	0.839327	338.38	2415.32	662.148	52.816	0.774656	213.426	2012.31	591.382	0.216859	0.209829	0.588454	0.355521	0.535137	0.430554
	142.314	0.833491	319.673	2624.08	691.586	48.9497	0.780953	224.879	2055.05	591.125	0.258068	0.214976	0.558324	0.363076	0.540245	0.425498
	146.987	0.835051	335.548	2637.1	702.969	49.8391	0.785283	215.426	1944.29	560.52	0.255091	0.211206	0.561693	0.361712	0.557702	0.421468
	142.819	0.837406	329.246	2664.88	694.843	82.6387	0.79333	253.225	2105.17	615.08	0.347605	0.206351	0.561605	0.359982	0.563513	0.420573
	141.081	0.790931	356.737	2619.15	815.507	45.5034	0.782115	204.534	2060.62	577.424	0.248591	0.269438	0.520634	0.383718	0.540325	0.430365
	139.696	0.814405	375.311	2677.74	788.288	53.0422	0.794393	221.712	2170.91	600.72	0.27528	0.235034	0.542703	0.371926	0.550892	0.42608
	104.874	0.81785	374.955	2927.92	809.164	43.865	0.799098	191.684	1954.4	527.636	0.296773	0.228817	0.53108	0.370203	0.573231	0.421004
	122.781	0.810019	356.929	2749.76	795.428	43.3243	0.794662	186.907	1957.47	526.039	0.267939	0.240326	0.524884	0.375108	0.561423	0.422776
	95.1587	0.809864	390.743	3004.52	868.19	38.321	0.787211	180.58	1762.56	490.075	0.293037	0.24444	0.504438	0.376741	0.583659	0.418337
	82.2831	0.789863	372.748	2965.8	893.266	36.1908	0.798812	214.683	1955.21	540.409	0.30744	0.265305	0.503741	0.385491	0.582256	0.414725
	37.5402	0.813148	402.906	2607.85	739.238	16.908	0.799528	289.863	2557.22	678.429	0.309343	0.236665	0.577634	0.357171	0.53701	0.417356
	86.1412	0.848231	415.555	3159.88	804.02	27.9735	0.787158	192.867	2130.88	567.508	0.243242	0.194377	0.564679	0.35543	0.533715	0.428042
test_2022_05_06_17_19	155.552	0.778979	274.726	2491.33	757.646	86.4858	0.757184	238.512	2044.25	662.948	0.360369	0.293661	0.473367	0.397091	0.524082	0.438843
test_2022_05_06_17_21	185.674	0.810674	284.829	2228.77	646.572	91.5314	0.76186	211.887	1944.59	610.855	0.33589	0.249565	0.534035	0.373709	0.529531	0.437286
	178.307	0.818856	301.566	2532.27	697.848	90.8957	0.773605	222.292	2107.5	638.331	0.341909	0.235028	0.524822	0.375611	0.525286	0.435894
	181.5	0.805844	257.861	2223.48	630.435	81.5287	0.772398	198.449	2118.26	618.941	0.319628	0.252329	0.523221	0.378254	0.501131	0.440459
	158.936	0.807547	268.813	2192.32	626.259	76.5841	0.767147	234.754	2149	659.156	0.329711	0.252101	0.548257	0.372178	0.523596	0.437094
	156.297	0.784658	274.087	2302.37	700.769	88.341	0.783024	229.038	2245.46	647.627	0.363242	0.276112	0.50452	0.387336	0.523259	0.433165
	136.938	0.784003	249.597	2319.62	686.955	85.6733	0.779325	175.644	1918.33	546.964	0.387357	0.27881	0.487178	0.392586	0.520907	0.435807
	155.997	0.795809	230.887	2056.81	596.228	86.5879	0.762078	200.855	1980.69	608.609	0.363995	0.269555	0.518501	0.384745	0.529143	0.438604
	125.956	0.788667	242.37	2291.23	667.949	89.3396	0.777927	217.421	2108.83	623.15	0.420582	0.273417	0.486078	0.39287	0.526372	0.434639
	160.703	0.804386	277.157	2254.69	650.207	89.607	0.78149	203.613	2100.19	604.347	0.355929	0.251627	0.533569	0.374779	0.518041	0.435323
	173.277	0.810574	256.072	2099.5	597.993	84.2894	0.781901	225.547	2052.86	603.375	0.328428	0.243505	0.552866	0.370418	0.546588	0.427828
	194.339	0.845464	251.919	1987.54	517.056	97.6379	0.779258	206.091	1885.56	565.05	0.337729	0.198772	0.606171	0.348116	0.558002	0.430066
	127.926	0.758404	277.156	2318.2	755.945	60.0543	0.774795	212.647	2295.94	655.241	0.324737	0.31357	0.487001	0.396615	0.485425	0.44042
	104.025	0.766517	275.213	2473.51	772.954	64.0339	0.786965	202.512	2170.31	604.287	0.395778	0.297643	0.475412	0.398145	0.507897	0.43525
	120.552	0.737436	312.73	2469.44	869.086	63.8793	0.789483	247.201	2265.58	654.862	0.346734	0.333256	0.460568	0.408106	0.509259	0.431264
	170.64	0.817168	271.348	2100.65	600.671	64.957	0.762929	190.198	2112.34	632.557	0.281776	0.240679	0.570681	0.365025	0.484237	0.445133
	173.651	0.812904	274.34	2132.2	612.524	78.1077	0.761611	199.75	2116.52	638.237	0.30139	0.247238	0.56466	0.367298	0.491807	0.442409
	150.887	0.798606	257.749	2187.6	636.716	108.16	0.763874	228.452	2028.23	634.438	0.391955	0.265963	0.526553	0.379459	0.539408	0.43487
	158.208	0.796179	267.588	2262.88	667.296	89.6687	0.758337	247.077	2116.21	678.472	0.365821	0.269634	0.515188	0.383259	0.529515	0.436825
	155.846	0.82622	265.276	2257.04	602.47	66.3183	0.773518	200.515	2094.93	613.688	0.305805	0.225816	0.554227	0.363942	0.50822	0.438649
	155.987	0.805444	263.179	2200.64	631.407	71.8065	0.761517	214.047	2075.57	639.751	0.312858	0.256596	0.524464	0.377954	0.50431	0.440156
	161.426	0.80974	246.207	2174.67	603.554	86.0485	0.756267	234.132	2009.98	649.118	0.342062	0.252999	0.537391	0.376173	0.52586	0.435965
	122.478	0.779313	259.66	2225.49	685.481	84.4644	0.753505	193.207	2096.95	644.65	0.397948	0.295628	0.506778	0.391495	0.489931	0.445899
	118.234	0.783529	262.715	2527.9	734.199	66.7164	0.778275	186.322	2011.06	572.129	0.353855	0.280426	0.476859	0.39205	0.526867	0.43508
	110.099	0.770651	279.951	2465.24	765.819	60.8314	0.775042	226.153	2085.46	624.121	0.357787	0.298102	0.485346	0.395885	0.532686	0.433951
	128.299	0.785079	278.452	2471.1	737.191	74.9344	0.774142	203.546	1943.99	578.115	0.369781	0.279106	0.49702	0.390632	0.538335	0.432057
	124.158	0.80056	276.106	2268.65	659.652	63.1443	0.783693	198.795	2063.53	585.813	0.33901	0.256745	0.533996	0.377784	0.521198	0.434218
	123.424	0.809333	285.157	2381.7	671.458	56.8693	0.795063	201.001	2032.05	553.939	0.320811	0.24049	0.535688	0.37447	0.547568	0.423136
	119.964	0.801817	309.452	2390.81	708.514	48.6082	0.784391	226.335	2045.17	592.296	0.296497	0.255197	0.533423	0.378691	0.559269	0.424641
	133.188	0.793874	287.262	2298.15	688.54	47.9219	0.787549	228.157	2061.27	591.893	0.270304	0.264422	0.532757	0.380588	0.568746	0.42392
	136.592	0.801819	283.458	2166.49	643.163	48.4167	0.762259	214.572	2057.86	630.408	0.266361	0.26139	0.545832	0.372643	0.521787	0.438832
	152.114	0.79378	280.06	2358.89	699.792	58.9961	0.776581	240.55	1974.37	608.731	0.288109	0.267572	0.516647	0.383798	0.553408	0.427495
	165.758	0.813325	278.503	2226.89	631.073	60.0818	0.780761	214.532	2135	610.856	0.270594	0.240225	0.552673	0.370129	0.521585	0.432009
	143.996	0.783371	275.732	2153.1	671.248	53.7607	0.779083	181.742	2140.91	588.825	0.280188	0.280198	0.543127	0.38405	0.480853	0.437125
	185.719	0.815996	304.56	2310.45	665.59	60.8136	0.788309	241.074	2156.51	617.638	0.251379	0.235859	0.540977	0.369805	0.545129	0.42356
	118.02	0.742136	303.243	2477.02	851.916	56.7054	0.781206	179.193	1982.76	554.55	0.327229	0.331281	0.469843	0.406969	0.52681	0.432195
	128.177	0.779515	317.086	2316.23	739.313	60.2845	0.815693	210.719	2029.07	522.336	0.322079	0.274245	0.513915	0.382279	0.580384	0.412335
	123.664	0.800026	304.38	2536.66	733.58	59.1935	0.805426	231.504	2045.67	562.028	0.327443	0.249543	0.520951	0.380048	0.582514	0.414247
	144.566	0.773185	304.577	2395.92	767.351	53.5767	0.785294	243.972	2091.05	615.388	0.278607	0.290695	0.504251	0.390907	0.5595	0.425566
	102.722	0.786795	300.781	2414.57	735.874	48.9259	0.776903	235.046	1990.36	597.99	0.321921	0.276185	0.520542	0.384411	0.577261	0.423117
	115.216	0.830566	303.76	2457.19	663.321	46.7755	0.799224	226.778	2177.95	589.379	0.288277	0.213188	0.557202	0.362748	0.553533	0.420934
	125.793	0.817912	316.326	2446.83	691.504	51.7789	0.809227	200.139	1921.5	509.725	0.283836	0.226444	0.553067	0.367628	0.579399	0.414887
	115.077	0.845832	310.325	2317.35	600.99	37.5802	0.796406	210.912	2159.61	572.338	0.241698	0.196141	0.605384	0.346279	0.539655	0.424105
	106.388	0.809376	332.209	2476.77	733.101	40.3416	0.782534	194.411	1899.97	534.032	0.286171	0.246652	0.534341	0.375381	0.570491	0.420121
	103.432	0.780085	354.933	2558.88	820.652	56.6985	0.824463	189.781	1835.39	461.26	0.358656	0.267123	0.517317	0.386725	0.61407	0.401099
	85.1068	0.790563	305.527	2468.04	748.154	51.3808	0.815901	178.353	1771.08	445.121	0.382105	0.257725	0.507233	0.386327	0.612692	0.401591
	77.3484	0.773008	313.077	2580.2	800.147	41.457	0.78333	273.796	2069.14	624.31	0.366765	0.294454	0.486831	0.390723	0.590621	0.414208
	88.802	0.783299	294.59	2311.71	709.957	55.0721	0.785253	238.079	2025.58	597.539	0.380189	0.278614	0.523946	0.381069	0.565929	0.423519
	106.71	0.796032	324.315	2418.01	734.585	37.6564	0.7851	205.618	1916.58	533.581	0.264516	0.262836	0.540855	0.377803	0.577237	0.415135
	114.532	0.809726	325.112	2421.55	709.711	43.104	0.803202	252.954	2165.44	595.92	0.276993	0.238712	0.547003	0.372485	0.57998	0.412332
	102.22	0.819766	296.65	2304.23	643.077	42.9564	0.776881	202.176	2002.19	571.238	0.289895	0.235112	0.561959	0.364695	0.545119	0.430404
	112.639	0.798564	313.508	2693.5	772.551	42.053	0.810475	226.702	2088.15	552.425	0.278331	0.249062	0.510198	0.38198	0.580354	0.412396
	102.353	0.814955	298.364	2255.67	645.186	37.1784	0.796884	201.532	2057.12	543.023	0.271426	0.234638	0.565391	0.36591	0.558367	0.420817
	110.381	0.799892	302.178	2365.56	704.869	41.8396	0.792276	202.024	2018.95	552.706	0.280117	0.254028	0.530078	0.376631	0.546262	0.425182
	91.2277	0.828547	325.29	2706.02	713.321	29.7991	0.78736	219.528	2018.87	565.98	0.250282	0.220392	0.544055	0.36403	0.57198	0.423321
	106.164	0.807273	350.877	2694.12	785.95	53.5896	0.781882	253.194	2052.9	618.055	0.314128	0.249083	0.536326	0.376052	0.567203	0.422065
	63.3274	0.769555	345.827	2575.08	825.867	33.4126	0.812886	195.495	1867.79	477.606	0.352925	0.284292	0.516718	0.387717	0.607266	0.403667
	75.8214	0.777884	340.915	2510.68	801.832	43.5179	0.831822	217.254	2168.27	523.25	0.374103	0.267641	0.511934	0.385666	0.589753	0.403668
	85.2701	0.815317	382.476	2875.27	824.468	35.4633	0.801813	223.523	2082.43	556.605	0.295211	0.232146	0.534476	0.373069	0.596429	0.413568
	93.053	0.7858	307.116	2225.27	692.118	40.7528	0.786184	232.185	2049.15	589.357	0.310868	0.276212	0.551387	0.375273	0.577732	0.419057
test_2022_05_06_17_25	125.377	0.775225	299.71	2533.75	779.9	106.585	0.757185	296.513	2313.74	758.996	0.465626	0.299837	0.483039	0.39193	0.524915	0.433989
test_2022_05_06_17_27	140.917	0.766509	276.707	2551.55	795.536	112.512	0.739075	291.513	2391.92	820.376	0.44364	0.317688	0.467133	0.399166	0.490969	0.445127
	165.889	0.796111	290.554	2391.8	712.22	73.0262	0.744206	253.394	2373.14	771.255	0.313409	0.277506	0.518652	0.380734	0.469572	0.444808
	168.554	0.758679	322.425	2652.79	873.052	102.381	0.749683	274.706	2283.68	759.315	0.381631	0.323481	0.461647	0.400712	0.510688	0.440569
	159.834	0.772835	314.661	2599.29	820.578	102.827	0.749039	234.532	2068.1	676.666	0.396586	0.304771	0.482667	0.393417	0.524486	0.438861
	171.003	0.801436	288.315	2297.33	676.328	80.003	0.76421	286.332	2524.56	788.822	0.32628	0.262034	0.535816	0.377117	0.490514	0.435703
	168.548	0.798179	304.585	2438.24	733.633	90.0636	0.747647	266.052	2287.57	753.107	0.351409	0.271392	0.524084	0.379299	0.501146	0.440915
	138.153	0.768115	333.624	2691.64	866.574	55.724	0.771504	241.584	2379.72	705.897	0.297095	0.301605	0.476932	0.395121	0.498923	0.435331
	139.334	0.808152	308.273	2707.06	756.493	70.7812	0.769806	271.783	2346.36	714.951	0.343227	0.251321	0.500719	0.381767	0.51723	0.431955
	179.706	0.806443	334.195	2517.48	748.286	80.8322	0.763205	255.116	2189.1	689.788	0.319909	0.254772	0.534455	0.377397	0.53335	0.43267
	144.839	0.76989	281.579	2347.9	748.542	105.097	0.761975	243.298	2184.39	691.138	0.425245	0.304108	0.493825	0.394728	0.515255	0.435979
	143.514	0.753053	269.013	2309.99	763.407	102.978	0.76913	258.413	2234.73	701.8	0.424392	0.322899	0.470877	0.401702	0.513501	0.43456
	186.996	0.801139	274.523	2342.36	678.543	142.579	0.790181	194.694	2042.21	571.246	0.440538	0.252167	0.509338	0.38372	0.524972	0.429576
	177.274	0.811628	288.138	2126.05	625.594	87.4048	0.76247	239.923	2190.12	680.304	0.336598	0.248069	0.55395	0.369159	0.520547	0.437552
	181.536	0.807924	296.478	2328.76	683.121	97.4774	0.773607	261.657	2278.36	698.311	0.355785	0.249612	0.537499	0.377116	0.523889	0.431211
	150.699	0.80075	300.203	2379.71	702.441	82.8658	0.778402	280.37	2236.28	687.586	0.362544	0.257609	0.525054	0.379224	0.545978	0.424397
	162.718	0.788958	305.351	2391.43	731.779	83.9755	0.785426	321.831	2389.8	745.928	0.344561	0.269575	0.521713	0.382591	0.543211	0.425099
	119.25	0.792684	301.604	2257.52	691.253	75.1396	0.786676	257.384	2212.67	651.518	0.392028	0.26502	0.530477	0.377659	0.546348	0.424396
	150.202	0.778274	331.088	2516.59	799.49	66.9793	0.768457	250.641	2178.17	667.438	0.321183	0.291763	0.509163	0.388069	0.529554	0.42957
	202.483	0.80839	294.786	2170.36	648.168	92.7957	0.76872	257.536	2193.27	682.387	0.316555	0.250351	0.566583	0.368647	0.537349	0.429161
	127.705	0.800683	260.503	2238.49	640.067	80.3307	0.775507	229.979	2239	666.617	0.392743	0.258483	0.533766	0.378527	0.500189	0.436879
	147.348	0.815806	302.654	2290.88	658.743	62.848	0.778903	279.882	2200.87	674.959	0.305444	0.238237	0.549124	0.370519	0.562127	0.423973
	169.632	0.819436	317.378	2490.23	699.51	67.2568	0.766531	251.468	2246.13	701.816	0.289834	0.236333	0.547537	0.370078	0.529671	0.437111
	163.799	0.802147	336.894	2532.62	760.211	51.6547	0.764998	243.181	2269.04	691.535	0.243517	0.259867	0.525059	0.377678	0.51575	0.435999
	166.136	0.778942	328.641	2463.12	786.443	65.6477	0.768477	261.275	2213.45	679.346	0.288335	0.291533	0.511998	0.389005	0.539582	0.42828
	161.197	0.825193	320.037	2378.67	673.164	57.1579	0.770658	277.457	2181.43	684.801	0.267944	0.227986	0.563663	0.36401	0.558628	0.425006
	140.806	0.831916	348.297	2652.17	722.436	43.0865	0.770229	220.79	2232.71	641.2	0.243808	0.220829	0.54908	0.365075	0.511873	0.431021
	175.085	0.823035	313.788	2379.98	668.582	64.8708	0.789544	259.694	2128.11	621.268	0.272815	0.226094	0.56744	0.36529	0.571116	0.417543
	110.622	0.813412	341.346	2818.72	783.137	49.2755	0.776924	293.548	2255.8	676.376	0.312787	0.244774	0.519882	0.375232	0.575083	0.418238
	115.876	0.800648	325.95	2512.35	744.551	49.5188	0.785394	283.62	2313.05	679.519	0.301323	0.255734	0.527787	0.375644	0.555801	0.42132
	126.45	0.804849	353.212	2512.5	752.57	54.6213	0.803671	235.889	2257.07	606.964	0.30512	0.244051	0.542006	0.374794	0.543079	0.420427
	88.8202	0.788156	326.783	2438.39	753.35	46.2213	0.792826	263.717	2200.38	632.687	0.349781	0.26918	0.538508	0.378645	0.57567	0.41773
	102.179	0.752798	303.912	2781.83	883.657	52.9784	0.760719	229.464	2268.89	700.754	0.34846	0.326086	0.448764	0.401	0.509273	0.442302
	114.505	0.795305	292.11	2570.61	737.925	50.9973	0.784451	214.777	2388.76	657.172	0.316591	0.262217	0.506151	0.38218	0.483767	0.43368
	120	0.81921	277.28	2408.45	647.788	73.0844	0.740804	227.284	2198.07	711.176	0.370856	0.24398	0.543812	0.370054	0.513301	0.444289
	108.496	0.806161	271.572	2302.14	654.515	65.5513	0.753489	233.867	2188.16	689.007	0.360723	0.260309	0.531026	0.374804	0.500264	0.437447
	100.013	0.79888	342.016	2646.05	780.913	45.9777	0.790093	248.319	2232.65	635.086	0.317179	0.255557	0.53029	0.376554	0.555686	0.422907
	96.3568	0.810562	346.178	2633.9	764.012	48.9978	0.787831	222.273	2057.18	580.869	0.33308	0.242556	0.529117	0.374551	0.566069	0.418861
	126.844	0.814163	340.326	2414.03	708.031	108.955	0.792833	282.494	2198.21	667.629	0.44184	0.235152	0.571821	0.36885	0.573438	0.421031
	114.893	0.806621	368.733	2771.65	825.596	44.5	0.789554	293.673	2295.64	674.35	0.288276	0.247644	0.538298	0.373208	0.58221	0.41679
	121.267	0.806412	320.604	2464.59	722.428	54.1619	0.783217	255.165	2432.42	701.32	0.314654	0.24861	0.540464	0.375794	0.509103	0.430054
	134.432	0.77896	295.503	2497.98	768.006	70.0334	0.757734	273.981	2310.12	738.489	0.346798	0.29357	0.492893	0.391083	0.517941	0.437969
test_2022_05_06_17_30	141.733	0.789375	290.102	2506.1	742.555	92.993	0.754463	268.022	2399.35	765.315	0.39658	0.281152	0.489631	0.38709	0.490416	0.439661
test_2022_05_06_17_31	147.941	0.779318	310.715	2620.25	809.845	98.1518	0.755922	273.9	2314.67	750.872	0.393932	0.293278	0.476297	0.393385	0.502982	0.437654
	145.18	0.803963	268.756	2256.82	657.577	119.553	0.767599	259.647	2197.86	691.193	0.451482	0.256461	0.537726	0.373099	0.528151	0.432213
	158.463	0.807205	269.032	2207.79	635.893	119.455	0.765378	251.398	2188.96	685.06	0.424712	0.253404	0.537415	0.374929	0.523391	0.431686
	172.287	0.814396	263.241	2104.51	596.36	145.227	0.763842	258.137	2162.32	693.311	0.445112	0.243716	0.562817	0.365487	0.535752	0.434007
	165.241	0.79999	280.655	2146.99	641.012	132.545	0.784841	255.919	2243.9	668.473	0.448036	0.255752	0.549845	0.372773	0.538004	0.428466
	161.303	0.765099	321.732	2639.23	849.879	111.992	0.732373	283.305	2320.56	803.898	0.423781	0.322962	0.478857	0.397666	0.487666	0.444962
	131.258	0.81534	287.092	2346.88	654.584	57.5934	0.769107	251.493	2437.66	726.777	0.313599	0.241892	0.54337	0.370119	0.493244	0.438993
	152.694	0.786428	289.89	2494.57	748.286	105.963	0.74931	267.299	2306.87	756.898	0.40185	0.287364	0.495279	0.388253	0.499902	0.440108
	107.076	0.800157	311.226	2432.52	720.764	67.2707	0.776328	215.474	2280.51	656.604	0.386332	0.258575	0.525686	0.37932	0.496818	0.436097
	159.82	0.805174	300.959	2404.54	697.723	72.5833	0.768229	283.922	2520.02	780.348	0.315048	0.254656	0.528579	0.37511	0.508767	0.435964
	141.547	0.803561	301.736	2501.7	718.728	84.1351	0.764083	271.54	2325.66	727.224	0.359588	0.258212	0.516234	0.378024	0.515727	0.433787
	137.403	0.80418	301.783	2351.03	691.673	59.5644	0.746163	275.615	2307	763.79	0.309952	0.265808	0.535546	0.37487	0.50808	0.439515
	93.9451	0.6947	327.161	2787.99	1058.05	64.4116	0.78377	258.923	2210.64	655.695	0.410957	0.393613	0.411076	0.421562	0.550093	0.426387
	123.361	0.807085	305.421	2315.13	677.493	68.6268	0.785709	275.583	2271.91	680.383	0.359993	0.246496	0.546777	0.372702	0.556364	0.424727
	125.224	0.82593	298.649	2282.54	624.356	66.0977	0.806288	296.39	2495.98	703.155	0.347074	0.216129	0.582843	0.35925	0.560203	0.420042
	129.822	0.816193	299.617	2326.59	664.87	82.6217	0.788045	289.187	2227.79	675.877	0.391342	0.235229	0.555782	0.368599	0.572879	0.420084
	128.807	0.7946	341.508	2557.14	776.143	58.0663	0.771991	260.054	2345.15	708.407	0.317688	0.267936	0.526801	0.380169	0.52133	0.433218
	132.774	0.815626	329.217	2590.46	733.542	54.3743	0.768848	266.993	2260.67	690.436	0.295444	0.243084	0.536855	0.372186	0.536489	0.42916
	119.161	0.808196	342.686	2580.6	753.398	57.1123	0.79084	236.458	2256.12	628.53	0.329118	0.243299	0.539397	0.375247	0.535917	0.424194
	102.085	0.809622	335.061	2588.16	738.058	49.9824	0.772419	257.255	2221.63	666.246	0.336211	0.248383	0.537886	0.371101	0.545089	0.426055
	102.335	0.813893	336.37	2377.09	704.922	51.0905	0.771863	246.507	2096.02	643.242	0.340927	0.243017	0.580139	0.367374	0.554257	0.425766
	90.7695	0.777374	339.232	2652.3	828.591	60.4935	0.772274	294.168	2220.46	693.987	0.403483	0.291586	0.496725	0.389578	0.567676	0.423514
	80.8937	0.7853	339.246	2662.68	817.531	50.0725	0.782739	318.501	2317.39	704.234	0.390626	0.27748	0.508864	0.386383	0.585233	0.420285
	105.58	0.80265	341.849	2530.08	747.981	43.726	0.781961	267.141	2344.98	671.56	0.298453	0.253784	0.557173	0.372302	0.545788	0.420762
	82.6026	0.803479	371.054	2783.81	811.072	43.2508	0.796679	253.856	2227.83	616.262	0.342146	0.24884	0.529682	0.375367	0.569607	0.415281
	102.115	0.816707	347.523	2503.91	726.288	55.5662	0.799405	278.102	2152.62	623.843	0.349822	0.23051	0.558441	0.367717	0.594304	0.412811
	133.859	0.820188	358.92	2570.93	745.947	58.39	0.779019	282.164	2264.76	695.624	0.312588	0.232143	0.556689	0.367261	0.568881	0.428376
	105.014	0.776389	343.683	2511.94	808.329	48.8525	0.782375	270.87	2295.74	672.634	0.321469	0.287751	0.52065	0.385189	0.542161	0.424127
	97.6519	0.789701	346.591	2636.95	804.78	43.6409	0.778402	286.159	2401.26	711.266	0.313662	0.273261	0.51618	0.382562	0.54318	0.427028
	102.796	0.77641	347.987	2560.24	826.01	50.7577	0.775597	279.28	2258.85	686.58	0.335016	0.290344	0.515254	0.388702	0.553981	0.424629
	102.842	0.761125	389.753	2696.46	918.059	56.3859	0.774599	251.745	2093.99	627.005	0.35138	0.312597	0.503788	0.394008	0.567508	0.420859
	99.9754	0.775728	330.16	2627.15	828.245	57.0057	0.758944	262.643	2244.03	710.957	0.369666	0.298745	0.489106	0.391651	0.519889	0.434927
	104.381	0.795697	323.228	2550.8	762.147	47.9837	0.770403	226	2173.07	631.696	0.32166	0.268847	0.519077	0.37945	0.537456	0.429205
	82.1283	0.804604	359.994	3028.07	856.661	45.3509	0.808141	300.125	2356.53	668.749	0.362689	0.242263	0.487472	0.380757	0.571998	0.418429
	83.4139	0.802659	353.405	2863.27	812.798	41.0231	0.797492	254.821	2371.47	653.054	0.334697	0.249179	0.506829	0.375959	0.542332	0.422057
	97.7933	0.825147	323.537	2519.64	689.245	40.9275	0.791036	257.786	2327.71	660.498	0.297015	0.22352	0.563597	0.36241	0.533988	0.42532
	84.8013	0.79959	351.128	2670.36	792.407	29.5855	0.798742	236.782	2353.16	619.516	0.264646	0.254237	0.524797	0.377669	0.542657	0.419211
	91.976	0.79749	339.157	2627.41	779.88	38.5429	0.794328	298.456	2365.35	683.005	0.301979	0.256941	0.534054	0.377379	0.56872	0.418885
	101.786	0.828333	338.464	2662.32	716.026	51.4064	0.788781	254.912	2039.95	608.256	0.340936	0.219691	0.555305	0.366199	0.591488	0.418324
	129.051	0.792809	287.426	2318.23	696.041	86.9901	0.772232	261.732	2277.75	692.288	0.406215	0.270741	0.516264	0.381042	0.520677	0.428741
	75.2395	0.773325	372.669	2767.03	890.771	46.1138	0.786047	267.724	2146.31	629.488	0.368211	0.292622	0.496089	0.389859	0.581361	0.416531
	66.5628	0.828165	367.436	2654.62	738.953	29.2884	0.772344	233.169	2101.73	611.563	0.303477	0.224505	0.594003	0.36081	0.572184	0.423086
	123.433	0.815649	289.401	2209.3	629.334	70.1007	0.77452	278.63	2402.1	735.489	0.369774	0.239441	0.569068	0.365336	0.513466	0.432456
test_2022_05_06_17_34	93.3376	0.8139	297.807	2616.53	702.542	65.6368	0.764639	279.322	2531.83	793.764	0.419804	0.246445	0.530686	0.36959	0.529328	0.444453
test_2022_05_06_17_35	95.5418	0.811016	305.731	2592.05	718.684	67.4552	0.770443	323.138	2723.03	861.361	0.422467	0.246953	0.533871	0.370989	0.515255	0.445272
	85.3519	0.793127	309.705	2632.14	762.065	67.1222	0.751977	313.946	2716.25	897.558	0.445837	0.276112	0.504474	0.381014	0.497701	0.451381
	89.9373	0.805883	305.953	2608.31	733.134	84.8094	0.748324	306.576	2667.25	892.509	0.49306	0.26037	0.527375	0.376686	0.500844	0.453047
	91.0024	0.782347	338.668	2725.67	836.758	79.0095	0.767847	286.598	2653.26	828.372	0.48253	0.284647	0.502389	0.385411	0.507803	0.446065
	87.287	0.741006	283.985	2542.59	838.498	91.8519	0.766426	308.601	2735.45	868.246	0.50995	0.339325	0.47028	0.403758	0.509899	0.447758
	99.1202	0.790456	335.268	2632.32	798.126	102.822	0.774371	314.082	2645.16	831.739	0.510137	0.271293	0.51856	0.384103	0.532115	0.440811
	106.02	0.805967	313.659	2489.85	716.067	86.0154	0.768074	324.862	2705.18	868.674	0.459247	0.253821	0.539416	0.373693	0.51816	0.444919
	91.037	0.773339	314.863	2590	810.323	87.0144	0.750125	304.531	2613.08	872.567	0.488184	0.302685	0.494144	0.392349	0.514981	0.452054
	95.8	0.787145	335.074	2643.44	803.962	81.3829	0.75618	326.384	2629.82	879.326	0.470565	0.282786	0.505179	0.385317	0.516582	0.446605
	108.98	0.802234	331.343	2614.78	768.303	86.7672	0.787831	318.315	2654.22	804.622	0.449742	0.252037	0.522964	0.378642	0.546289	0.436854
	65.6182	0.78187	321.035	2674.78	811.098	54.8876	0.775274	285.099	2586.3	787.487	0.446717	0.282935	0.49902	0.387547	0.526243	0.444411
	102.601	0.782063	325.819	2503.52	775.843	88.8185	0.776001	306.09	2552.14	799.902	0.469469	0.281447	0.512045	0.385102	0.549474	0.440942
	86.5101	0.800078	332.365	2607.29	763.856	78.596	0.779717	303.7	2620.48	804.915	0.477857	0.257359	0.524311	0.376293	0.533676	0.439759
	127.273	0.802655	346.776	2509.78	765.335	68.5909	0.777659	326.776	2711.18	840.396	0.360415	0.255218	0.549516	0.373545	0.534094	0.439394
	89.5248	0.813143	349.748	2799.63	785.001	51.0783	0.785968	262.628	2607.98	750.374	0.371002	0.239811	0.529798	0.373387	0.526768	0.440854
	73.0199	0.821821	304.222	2255.68	626.89	53.1971	0.778615	273.097	2567.5	766.178	0.430497	0.229904	0.59667	0.355615	0.525472	0.441655
	112.653	0.792133	343.587	2727.75	817.218	88.8017	0.788196	346.695	2613.05	816.311	0.451396	0.265251	0.508733	0.383519	0.564369	0.436419
	87.4056	0.803687	345.808	2787.42	803.881	62.9775	0.766566	314.943	2543.37	820.121	0.425907	0.25719	0.516183	0.379674	0.55329	0.445547
	78.4528	0.78875	316.585	2630.73	780.482	54.7197	0.788591	329.629	2556.48	785.259	0.418548	0.268954	0.506699	0.382537	0.569519	0.434384
	99.5442	0.798172	328.193	2529.73	753.094	65.2929	0.795047	315.352	2553.02	757.481	0.403516	0.254333	0.53643	0.377611	0.567533	0.431167
	89.5067	0.814993	353.91	2782.61	786.47	50.2411	0.781899	285.082	2707.04	796.99	0.369445	0.23689	0.535539	0.372919	0.519233	0.441598
	86.1487	0.825682	348.347	2757.15	747.974	59.5036	0.803801	280.931	2430.24	684.992	0.411635	0.218006	0.555301	0.365629	0.575509	0.426125
	96.3679	0.827605	318.186	2436.46	664.714	55.079	0.799543	285.307	2658.78	747.244	0.370793	0.216928	0.583503	0.357525	0.546497	0.434496
	70.6851	0.807887	351.449	2781.96	791.824	42.0176	0.789447	303.201	2601.49	765.319	0.380884	0.244587	0.532708	0.372154	0.548673	0.43573
	95.8874	0.807476	323.274	2460.57	711.896	46.8874	0.79661	354.004	2782.4	833.18	0.340092	0.242613	0.564588	0.368847	0.542359	0.434685
	78.9826	0.795525	323.421	2719.91	786.439	49.1122	0.790828	319.071	2586.54	773.47	0.390536	0.260531	0.512847	0.381896	0.559994	0.433834
	79.4602	0.83029	336.431	2636.44	697.361	44.2244	0.774137	301.41	2558.56	792.971	0.365012	0.220466	0.572782	0.35872	0.549789	0.443918
	80.6373	0.806845	349.784	2684.95	770.662	50.6169	0.781041	328.768	2642.31	820.158	0.395396	0.247368	0.538222	0.371649	0.54485	0.439351
	83.5576	0.821615	351.574	2688.28	746.061	60.1152	0.777187	313.988	2528.08	790.979	0.417449	0.230782	0.55885	0.36506	0.552171	0.439097
	84.7398	0.808763	372.661	2751.29	801.737	56.9094	0.799344	327.181	2516.63	749.559	0.408694	0.239081	0.529411	0.373566	0.583022	0.4286
	66.0333	0.802951	360.774	2800.98	807.251	38.0963	0.786749	294.106	2603.86	765.176	0.378636	0.25273	0.535108	0.375151	0.543204	0.437328
	76.8109	0.797221	363.056	2877.28	850.025	48.3458	0.791817	319.826	2470.51	749.362	0.398648	0.258029	0.514171	0.380841	0.574806	0.431054
	85.0047	0.822997	338.864	2931.1	777.208	47.1305	0.792319	318.858	2593.16	768.317	0.363298	0.224838	0.524682	0.370064	0.55217	0.431465
	70.5325	0.804326	353.853	2799.56	802.385	53.0693	0.800132	308.594	2484.43	725.025	0.432786	0.24603	0.531746	0.376749	0.579264	0.426822
	57.2766	0.798512	415.843	3239.23	940.819	39.6117	0.790378	296.169	2343.94	693.967	0.410469	0.256297	0.504275	0.382809	0.578924	0.423167
	50.5665	0.791536	404.278	3177.8	914.09	31.2633	0.799182	301.495	2609.38	735.338	0.387766	0.26203	0.513263	0.379571	0.55673	0.42926
	62.2236	0.773515	387.833	2952.38	930.029	43.4472	0.807489	344.046	2648.08	764.297	0.414093	0.282871	0.503309	0.389016	0.577337	0.426922
test_2022_05_06_17_38	79.589	0.799847	262.302	2314.88	654.157	70.2309	0.767892	215.181	2237.44	663.117	0.471062	0.263733	0.530093	0.379192	0.493955	0.439746
test_2022_05_06_17_41	95.3209	0.823468	263.845	2241.83	590.256	73.6028	0.783355	238.765	2408.17	687.356	0.440989	0.226681	0.561478	0.361283	0.501957	0.432833
	81.5635	0.805749	288.153	2403.79	676.259	49.6403	0.782952	171.453	2322.87	610.918	0.391284	0.250463	0.530925	0.3751	0.456668	0.439613
	90.9393	0.803609	265.391	2283.2	644.25	56.6933	0.804877	121.385	2298.89	537.009	0.394132	0.244905	0.532511	0.376869	0.450024	0.44991
	68.0297	0.804085	272.417	2362.83	661.285	81.5676	0.786481	151.24	2164.51	566.693	0.498709	0.250335	0.546245	0.377987	0.469819	0.443796
	77.5082	0.790206	298.999	2371.64	713.651	82.7678	0.795898	156.405	2295.91	575.025	0.461991	0.265862	0.535329	0.380636	0.460785	0.440195
	89.685	0.802009	265.165	2288.4	645.543	51.9817	0.799923	158.059	2421.6	592.913	0.379143	0.249204	0.537854	0.376421	0.449614	0.442211
	94.1175	0.776808	258.979	2028.23	638.578	62.0372	0.772374	181.95	2278.58	635.812	0.399771	0.290652	0.548766	0.382853	0.471908	0.442821
	69.991	0.810877	232.572	2063.88	563.129	59.2748	0.789657	185.275	2408.33	631.485	0.4563	0.240348	0.561228	0.36603	0.467585	0.438195
	70.0385	0.771485	279	2671.95	796.032	75.8962	0.747785	253.546	2223.15	722.194	0.519437	0.307126	0.453261	0.396731	0.5167	0.438941
	80.703	0.791684	274.11	2406.34	698.337	47.3188	0.780793	182.061	2248.11	610.331	0.384357	0.267728	0.509241	0.383071	0.470325	0.440192
	69.223	0.768132	295.816	2455.01	767.212	49.6713	0.764663	253.562	2349.89	712.699	0.422443	0.307486	0.492882	0.391625	0.508087	0.437252
	97.0784	0.766593	284.614	2485	772.418	86.8568	0.809335	179.595	2197.67	551.394	0.457376	0.288906	0.49226	0.394839	0.508218	0.427719
	112.581	0.82621	254.563	2126.83	570.181	69.5389	0.77928	195.6	2202.16	621.719	0.384748	0.223419	0.579775	0.361237	0.495582	0.438385
	109.134	0.822783	282.196	2265.86	622.109	56.4397	0.784384	233.539	2367.01	675.486	0.354947	0.227992	0.568472	0.359208	0.508205	0.433361
	78.814	0.767038	288.482	2340.65	741.346	46.8953	0.78102	177.353	2359.96	623.867	0.37815	0.301965	0.508223	0.388005	0.474253	0.442542
	88.6875	0.777641	314.352	2464.32	763.102	61.3413	0.748954	242.003	2267.77	716.378	0.410476	0.301955	0.529472	0.384965	0.496925	0.443153
	103.127	0.809761	267.32	2316.82	641.051	43.6067	0.785161	210.502	2439.87	668.23	0.308053	0.244341	0.547075	0.371954	0.463545	0.439503
	59.3257	0.766527	323.286	2627.51	830.536	50.7622	0.788543	168.779	2170.98	570.367	0.459979	0.298301	0.488276	0.392779	0.498411	0.440545
	63.2386	0.785166	281.601	2351.55	682.613	50.186	0.786409	250.154	2246.65	639.36	0.446704	0.274679	0.531689	0.377888	0.540475	0.424032
	63.3679	0.788277	279.609	2433.29	703.858	57.4387	0.780993	253.66	2317.61	679.043	0.471086	0.273125	0.506803	0.382034	0.522109	0.429588
	64.5328	0.793034	302.011	2470.77	736.642	36.4318	0.803407	151.304	2129.86	520.1	0.373001	0.25862	0.5222	0.381975	0.491827	0.438096
	70.3449	0.761354	299.54	2547.54	801.966	33.8221	0.810287	155.842	2436.57	568.039	0.334746	0.296204	0.480477	0.397171	0.456262	0.439283
	76.7444	0.788828	280.481	2470.66	713.563	42.9082	0.783584	164.809	2119.67	560.046	0.357872	0.275329	0.507608	0.384764	0.490544	0.441506
	77.4309	0.79115	283.059	2565.91	729.225	50.0521	0.778793	240.82	2157.19	633.639	0.399682	0.27058	0.491673	0.385327	0.537172	0.425687
	107.183	0.794902	293.919	2443.28	715.954	60.2951	0.765459	253.24	2101.14	661.1	0.365703	0.271035	0.519192	0.383919	0.552364	0.430241
	102.303	0.797372	309.624	2384.03	712.152	54.0483	0.783237	214.416	2148.29	617.659	0.352792	0.259855	0.536297	0.373266	0.535543	0.433856
	63.1433	0.792469	315.749	2570.18	751.131	33.0421	0.812126	178.493	2311.67	540.37	0.353833	0.259727	0.523341	0.381182	0.488954	0.42645
	64.3042	0.809961	294.665	2448.08	670.247	37.0875	0.797047	188.837	2235.49	555.892	0.366123	0.240432	0.555303	0.364308	0.519038	0.425373
	78.3858	0.82662	285.464	2219.39	608.712	40.9475	0.798473	218.374	2320.54	609.934	0.349174	0.218944	0.588413	0.358084	0.529345	0.424191
	82.2189	0.823292	276.711	2239.2	607.019	41.9358	0.789171	240.376	2276.25	634.778	0.342151	0.225938	0.565264	0.361194	0.52561	0.424409
	65.7478	0.780007	289.34	2557.84	762.752	49.1128	0.786014	211.347	2209.12	604.943	0.421497	0.283243	0.503943	0.386607	0.511586	0.428403
	67.1897	0.822462	273.568	2460.26	641.091	41.298	0.797143	273.155	2457.21	687.875	0.375534	0.224277	0.539602	0.367324	0.525154	0.424295
	94.3964	0.836789	292.382	2252.15	603.545	30.9675	0.791683	217.726	2309.93	616.343	0.252518	0.208812	0.601813	0.348825	0.512245	0.426819
	63.1127	0.765472	324.275	2600.52	825.95	45.6648	0.78602	236.308	2274.99	624.917	0.415017	0.303627	0.490714	0.395013	0.533084	0.425431
	67.3408	0.811675	315.351	2525.51	705.423	34.1184	0.808282	180.234	2287.06	561.608	0.335716	0.234212	0.541864	0.36949	0.486336	0.427766
	73.8488	0.765395	327.551	2702.89	841.524	66.3372	0.763392	239.931	2208.62	679.702	0.490366	0.308778	0.480821	0.393642	0.506274	0.435735
	65.5307	0.819116	297.745	2609.17	689.246	40.9093	0.784774	243.022	2198.34	614.465	0.385782	0.233268	0.544338	0.366315	0.555124	0.42149
	67.8328	0.793308	304.776	2517.42	736.101	44.6627	0.787769	275.615	2273.13	664.242	0.400485	0.265235	0.520618	0.378914	0.562966	0.421478
	84.4275	0.780481	274.996	2301.7	701.641	80.9765	0.773175	240.164	2265.44	681.462	0.49421	0.285567	0.503189	0.387973	0.513953	0.43498
	83.0473	0.777173	263.935	2458.07	727.165	81.8087	0.766908	210.504	2129.7	639.487	0.498306	0.292087	0.498652	0.393529	0.512356	0.440725
	53.2814	0.772424	286.686	2247	694.21	35.3769	0.803067	188.235	2077.79	530.482	0.401744	0.287319	0.530665	0.377614	0.548948	0.421125
test_2022_05_06_17_47	143.202	0.765865	307.455	2705.27	846.442	88.1875	0.748394	241.686	2359.49	755.264	0.386188	0.314384	0.463855	0.395824	0.50447	0.420532
test_2022_05_06_17_49	165.34	0.746388	320.284	2603.09	888.934	93.417	0.736261	257.064	2339.91	785.62	0.369475	0.347352	0.459232	0.404938	0.507878	0.421578
	106.788	0.822464	331.967	2494.55	692.064	44.8639	0.77027	180.087	2258.34	627.668	0.30937	0.232592	0.555746	0.362772	0.492322	0.420766
	126.081	0.780584	352.511	2813.78	871.716	63.0316	0.768193	210.514	2246.08	659.795	0.337595	0.287217	0.487287	0.387536	0.517725	0.413954
	142.032	0.73292	340.213	2697	937.115	70.9499	0.75167	217.849	2380.43	726.625	0.345256	0.358258	0.45205	0.403361	0.49073	0.421459
	145.62	0.756463	351.382	2732.07	919.39	79.6914	0.746653	272.406	2477.14	802.147	0.35676	0.327755	0.479267	0.39565	0.503194	0.416084
	118.23	0.791515	354.696	2745.95	820.603	51.9811	0.779535	206.037	2227.44	618.624	0.321108	0.270761	0.498757	0.382553	0.52137	0.407137
	151.78	0.836439	340.469	2510.27	681.1	56.112	0.742612	194.723	2284.45	701.919	0.278997	0.222449	0.585668	0.357104	0.47051	0.424135
	157.478	0.781556	317.24	2858.62	860.223	87.0928	0.756814	244.216	2207.68	700.131	0.357747	0.290304	0.458271	0.391847	0.526797	0.413398
	164.659	0.701484	351.954	2905.97	1096.7	86.2513	0.748034	228.239	2349.04	739.103	0.349867	0.402918	0.405707	0.415748	0.49015	0.421789
	132.562	0.766991	345.724	2807.39	897.234	88.5478	0.74991	232.286	2371.25	747.699	0.415183	0.312419	0.460495	0.395212	0.48951	0.421594
	115.522	0.669807	303.671	2665.93	1066.41	95.328	0.749731	261.884	2480.91	804.295	0.4622	0.443447	0.39721	0.425431	0.493537	0.420084
	96.144	0.677239	301.899	2770.42	1066.47	72.6693	0.770599	209.718	2446.24	704.455	0.437333	0.421485	0.383937	0.424788	0.480301	0.418526
	141.879	0.749114	344.446	2726.49	921.926	104.93	0.767644	206.845	2285.05	675.288	0.431374	0.327614	0.457174	0.399212	0.508994	0.418699
	173.057	0.758458	342.667	2727.02	901.91	104.381	0.762216	212.823	2290.15	694.223	0.380251	0.318136	0.455657	0.399705	0.500026	0.419775
	146.067	0.709526	371.454	2918.28	1083.35	86.4121	0.772003	230.545	2307.62	678.408	0.382006	0.379161	0.42343	0.412203	0.525228	0.409222
	138.519	0.737627	333.567	2727.2	943.123	89.0426	0.75769	211.427	2385.35	721.402	0.400301	0.34885	0.448603	0.405535	0.49258	0.423187
	154.745	0.794579	328.722	2569.73	776.087	92.9234	0.772619	243.502	2213.33	672.846	0.379403	0.267213	0.512159	0.383571	0.539506	0.40651
	160.333	0.756498	349.279	2688.26	907.526	108.702	0.743654	236.611	2239.33	733.253	0.403878	0.328617	0.473933	0.398567	0.51409	0.421411
	163.136	0.816959	323.427	2354.12	683.181	91.4146	0.776426	263.427	2413.05	725.998	0.358842	0.236537	0.562223	0.365212	0.531297	0.408301
	101.871	0.764281	334.218	2672.51	862.729	52.4316	0.784024	242.574	2321.34	665.538	0.347077	0.301824	0.476478	0.393216	0.532238	0.404638
	127.814	0.776132	354.898	2829.82	889.211	57.045	0.761961	240.722	2412.9	718.952	0.317047	0.296517	0.46999	0.39162	0.507669	0.416646
	156.329	0.763267	350.341	2740.6	900.07	107.237	0.753771	220.135	2289.03	706.146	0.406617	0.315984	0.468152	0.396413	0.505825	0.419058
	143.084	0.78433	360.282	2781.85	864.362	45.4936	0.793863	189.377	2425.86	622.965	0.246303	0.273687	0.503398	0.385745	0.482403	0.409604
	122.783	0.786654	357.747	2798.08	858.806	41.4311	0.778077	183.478	2231.69	612.392	0.263222	0.276236	0.503572	0.384747	0.506701	0.41396
	144.118	0.771081	365.692	2801.6	902.365	54.7475	0.786036	188.937	2282.91	616.804	0.283493	0.293128	0.486464	0.391342	0.512374	0.412393
	156.806	0.768665	365.074	2793.03	912.382	58.2269	0.77836	244.124	2187.71	651.19	0.272539	0.299021	0.483473	0.392843	0.56119	0.403954
	135.166	0.781851	342.933	2924.38	888.394	51.6734	0.789517	194.027	2292.55	614.887	0.283887	0.27813	0.468192	0.389611	0.510637	0.412169
	146.229	0.761245	353.31	2840.52	921.927	60.7193	0.774747	204.151	2065.53	601.127	0.295498	0.310021	0.46665	0.394382	0.54654	0.405852
	143.412	0.797762	357.811	2723.25	823.004	52.7282	0.783206	229.091	2244.46	633.422	0.270208	0.259895	0.519479	0.378791	0.550461	0.401213
	182.566	0.756478	409.623	3218.43	1078.18	40.5138	0.776537	190.94	2553.66	695.64	0.195381	0.315996	0.441085	0.397915	0.47475	0.422646
	126.391	0.805606	380.782	2804.35	831.569	33.1726	0.785324	212.948	2323.12	624.01	0.215643	0.248194	0.529673	0.376478	0.519815	0.40673
	127.43	0.79994	374.547	2804.73	836.65	30.6914	0.787819	231.128	2390.25	641.666	0.205563	0.255861	0.519191	0.378518	0.535998	0.403028
	115.153	0.799796	358.464	2713.16	808.246	36.4146	0.796112	200.126	2193.8	578.985	0.246084	0.253764	0.524718	0.378024	0.547718	0.4003
	115.104	0.758566	346.738	2631.38	876.495	37.2857	0.805439	229.924	2291	592.729	0.24946	0.303197	0.485522	0.393135	0.555343	0.391594
	101.675	0.749824	379.373	2903.24	980.823	36.3311	0.797115	208.599	2285.29	590.659	0.261407	0.320428	0.464151	0.398631	0.550769	0.398814
	122.335	0.721776	343.984	2799.9	999.59	44.7216	0.781623	221.562	2231.59	631.594	0.27457	0.358749	0.445397	0.409172	0.543108	0.401735
	131.489	0.741279	374.019	2997.46	1023.45	54.1435	0.791011	269.037	2545.98	716.222	0.297069	0.330446	0.438476	0.402263	0.536448	0.401527
	97.8487	0.794606	389.131	2857.58	867.113	29.1292	0.806928	213.772	2249.8	573.949	0.237664	0.25642	0.522446	0.37868	0.571527	0.391474
	81.9763	0.786884	407.029	3134.67	950.465	22.5657	0.806081	193.332	2183.14	545.506	0.223415	0.268728	0.494215	0.382313	0.550172	0.391377
	94.5941	0.791288	406.516	3085.58	935.568	29.414	0.801062	234.977	2417.41	639.235	0.237006	0.262703	0.488934	0.38403	0.552106	0.400116
	83.7713	0.81043	381.762	2892.68	834.761	39.1064	0.820971	190.564	2389.21	557.136	0.300537	0.231921	0.539228	0.372772	0.520868	0.393843
	123.168	0.778416	344.821	2827.66	877.065	64.7111	0.788155	219.731	2240.3	623.555	0.352584	0.282108	0.478768	0.390241	0.530732	0.402984
	123.971	0.77974	349.461	2680.79	844.274	65.4699	0.768587	220.942	2101.49	636.052	0.354763	0.287831	0.489002	0.389081	0.542892	0.406811
	122.134	0.810976	386.693	2971.42	854.79	50.7458	0.789946	214.082	2239.44	614.831	0.300877	0.2402	0.515121	0.375572	0.535505	0.404929
	151.301	0.832238	389.054	2747.72	763.152	64.7942	0.799831	238.82	2206.92	617.333	0.301813	0.210415	0.576128	0.360329	0.576001	0.394775
	103.769	0.779004	347.265	2711.24	844.157	60.4713	0.785597	238.773	2267.63	646.889	0.363388	0.283406	0.497408	0.388413	0.545811	0.400106
	108.504	0.773445	341.273	2547.45	821.744	59.2201	0.790527	249.542	2296.44	651.698	0.349115	0.288043	0.511666	0.38844	0.55951	0.396071
	129.271	0.753401	398.664	2857.27	980.137	61.1857	0.80002	245.381	2225.64	614.235	0.326018	0.30979	0.472143	0.398913	0.587479	0.390508
	116.383	0.769817	370.911	2899.62	928.936	68.7338	0.785857	232.902	2178.54	627.495	0.357171	0.294228	0.481009	0.393234	0.567036	0.399212
	86.1905	0.743345	378.927	2970.2	1002.47	37.0306	0.781383	226.403	2537.58	699.649	0.301504	0.329263	0.467544	0.398304	0.495084	0.411011
	82.5483	0.789944	444.649	3164.17	977.248	35.0052	0.803885	207.356	2097.42	548.061	0.30002	0.263093	0.503082	0.383687	0.574414	0.388167
	78.652	0.779639	395.42	2814.18	895.389	34.4523	0.822412	222.159	2255.85	555.491	0.30595	0.269806	0.513225	0.384969	0.589058	0.380751
	86.8295	0.769652	374.963	2950.64	941.243	39.8273	0.788244	185.086	1933.55	526.166	0.318387	0.29551	0.478463	0.393005	0.580785	0.391645
	99.0897	0.788918	432.477	3183.74	981.495	34.7425	0.793476	254.027	2541.36	678.509	0.269841	0.268989	0.501515	0.38257	0.521808	0.400925
test_2022_05_06_17_52	167.322	0.758415	301.562	2510.11	819.669	116.191	0.787667	217.886	2038.56	592.469	0.420499	0.307664	0.487173	0.39637	0.555204	0.427726
test_2022_05_06_17_53	148.624	0.808009	289.101	2305.55	668.298	89.1745	0.77483	246.648	2197.23	668.606	0.386224	0.248525	0.546576	0.374625	0.529729	0.433479
	128.261	0.777528	273.598	2255.43	696.079	79.3179	0.76144	178.428	2029.97	610.373	0.385853	0.292671	0.507079	0.3852	0.497628	0.445446
	129.246	0.758046	300.361	2520.33	827.369	88.5842	0.772368	197.399	2179.13	636.196	0.408673	0.31554	0.472685	0.399738	0.494818	0.4407
	102.368	0.71112	327.367	2717.32	991.315	77.747	0.76773	177.18	2206.56	636.164	0.437943	0.377125	0.425127	0.415084	0.477289	0.447274
	138.012	0.788864	291.819	2321.64	708.562	106.848	0.777859	201.26	2065.66	602.794	0.440807	0.272442	0.522918	0.381933	0.52246	0.435863
	123.182	0.781534	272.655	2252.89	693.047	91.6701	0.777058	187.564	1981.23	572.347	0.434389	0.282675	0.513958	0.38785	0.525356	0.434105
	116.228	0.741491	248.211	2276.7	762.843	88.8886	0.775621	215.106	2143.47	631.913	0.439586	0.33583	0.463296	0.404595	0.515198	0.434896
	114.064	0.767003	245.331	2244.11	697.889	75.4089	0.795625	170.035	2149.98	562.663	0.409296	0.293996	0.491215	0.393891	0.488946	0.438594
	165.35	0.784368	273.002	2148.28	668.224	98.8359	0.762547	222.184	1984.48	625.989	0.382859	0.284304	0.527539	0.383015	0.528588	0.435098
	153.36	0.816807	268.424	1872.61	553.925	90.9249	0.785976	193.845	2009.48	567.647	0.380161	0.233914	0.603194	0.35418	0.534581	0.430293
	110.178	0.798877	276.598	2188.83	640.545	65.8636	0.786466	175.725	2007.72	553.588	0.394476	0.25573	0.550302	0.372494	0.513477	0.436135
	126.904	0.753483	287.728	2359.67	784.531	78.3088	0.775625	198.174	2104.69	605.307	0.392854	0.319996	0.481506	0.398753	0.513455	0.437282
	120.496	0.745884	299.871	2602.47	867.71	80.4835	0.785742	199.133	2119.42	598.494	0.406343	0.32454	0.459088	0.404303	0.5174	0.435251
	115.824	0.766664	329.529	2484.17	818.495	62.3394	0.77063	187.706	2147.32	611.403	0.361787	0.304517	0.488289	0.393611	0.501008	0.437631
	107.019	0.761373	320.297	2523.33	823.252	68.9668	0.759683	199.341	2136.06	642.877	0.394934	0.315473	0.489497	0.394745	0.493008	0.441663
	140.181	0.776754	305.501	2349.71	746.943	87.5288	0.789406	220.988	2153	610.097	0.38637	0.284149	0.521821	0.386476	0.528945	0.428859
	168.966	0.801411	269.677	2381.63	678.772	73.3537	0.769652	214.74	2012.2	612.116	0.31227	0.259197	0.517262	0.381364	0.528528	0.432243
	117.455	0.757172	305.559	2581.96	843.443	68.5504	0.787246	214.035	2082.05	593.079	0.371565	0.309481	0.466688	0.399599	0.536222	0.427183
	129.083	0.794578	304.549	2423.86	724.825	73.094	0.794926	169.671	2072.13	546.232	0.373368	0.258772	0.520305	0.380187	0.50821	0.433923
	163.34	0.794292	297.49	2415.15	723.735	75.5776	0.791959	213.588	2173.22	602.582	0.322991	0.260701	0.524151	0.380355	0.526296	0.428275
	141.58	0.77885	293.476	2356.45	736.462	76.4623	0.792177	198.49	1950.76	545.475	0.354638	0.280031	0.500355	0.38783	0.546662	0.424146
	121.498	0.791136	293.893	2367.45	716.295	63.6549	0.776262	227.037	2179.35	643.773	0.345158	0.27054	0.517559	0.383229	0.523938	0.432507
	119.571	0.778016	317.511	2514.75	789.632	53.6221	0.790544	199.552	2092.85	573.107	0.317534	0.282265	0.493858	0.389747	0.538829	0.428325
	96.4895	0.7942	309.262	2487.72	742.5	51.0018	0.799014	153.966	2151.61	539.609	0.35792	0.258554	0.52539	0.380838	0.488603	0.438858
	149.396	0.766397	333.909	2454.86	816.191	73.1551	0.7895	233.915	2083.54	605.856	0.334169	0.297464	0.496984	0.392041	0.542488	0.425804
	108.995	0.776253	334.063	2604.06	824.316	33.4044	0.838168	157.779	2437.31	507.69	0.248264	0.267341	0.504381	0.389235	0.493843	0.424006
	124.289	0.756414	323.562	2442.57	821.812	44.9038	0.79554	177.987	2060.76	540.752	0.283507	0.307289	0.495673	0.395643	0.522984	0.430751
	120.625	0.78147	295.665	2508.39	768.343	54.2548	0.809346	197.116	2014.33	521.882	0.31565	0.272043	0.498566	0.390554	0.556489	0.415425
	88.5165	0.792341	308.9	2497.79	743.125	41.6447	0.788598	199.818	2205.17	601.415	0.323739	0.265651	0.524515	0.381209	0.512308	0.43219
	91.7824	0.778595	304.573	2504.73	770.011	46.3393	0.807638	179.464	1981.51	506.844	0.338972	0.275671	0.508576	0.386328	0.554313	0.421354
	95.3441	0.770735	309.731	2371.28	763.489	67.0386	0.782212	177.953	2066.08	572.898	0.396351	0.294805	0.508845	0.389886	0.514662	0.437809
	89.0505	0.798217	318.602	2493.54	735.932	39.101	0.788743	195.285	1912.3	532.716	0.308815	0.257545	0.53629	0.376354	0.580289	0.421308
	86.7527	0.79536	340.547	2497.78	758.713	36.6596	0.808674	205.281	2265.03	568.758	0.299831	0.254052	0.534108	0.376075	0.543762	0.419606
	133.464	0.750621	317.297	2485.13	848.397	64.0761	0.816668	185.221	2038.39	508.728	0.328	0.306164	0.487852	0.399422	0.564858	0.416953
	132	0.761936	326.324	2507.54	832.607	68.4873	0.836328	189.592	2098.77	492.498	0.344794	0.284906	0.496148	0.394709	0.582506	0.408693
	161.744	0.762214	294.058	2181.54	732.698	69.2154	0.825375	171.383	1830.57	446.099	0.305712	0.289982	0.516373	0.391374	0.599298	0.406636
	114.848	0.774882	322.001	2570.73	809.764	55.1575	0.807583	182.483	2151.57	541.216	0.332631	0.278805	0.501131	0.391493	0.521379	0.424437
	126.305	0.82863	334.044	2334.54	660.381	38.2788	0.801591	171.907	2356.92	589.965	0.23938	0.214211	0.590895	0.355461	0.474963	0.437889
	102.208	0.78941	283.727	2057.37	642.791	57.4886	0.784298	212.314	2023.35	581.947	0.361949	0.26971	0.57014	0.371949	0.547942	0.426704
	118.987	0.825069	328.214	2497.2	696.821	50.0192	0.791878	232.355	2168.41	604.337	0.296133	0.223186	0.56306	0.36531	0.551839	0.422563
	90.3477	0.794516	318.444	2525.21	745.538	54.9104	0.765115	224.548	2029.21	611.194	0.385108	0.27161	0.525735	0.378592	0.552044	0.427957
	92.6704	0.740782	314.942	2546.25	880.437	50.2704	0.805476	182.687	2060.51	519.847	0.346945	0.323722	0.452351	0.403501	0.555141	0.419948
	95.9054	0.745139	335.215	2636.65	899.575	52.4358	0.801785	203.024	2185.43	565.23	0.351466	0.3207	0.469034	0.401136	0.53435	0.423944
	67.119	0.779312	416.857	3045.22	961.431	23.1316	0.816809	214.721	2145.75	541.391	0.2571	0.272514	0.490009	0.387143	0.573811	0.417495
	69.8774	0.790222	382.704	2902.13	875.048	27.5382	0.798983	201.642	2187.81	566.082	0.292095	0.265524	0.507454	0.382931	0.545126	0.422353
	75.1592	0.74754	343.587	2483.28	844.765	44.1083	0.798377	202.389	1999.83	544.151	0.388507	0.317289	0.497882	0.392722	0.568518	0.421869
	66.8722	0.763004	374.462	2734.32	885.266	27.812	0.804266	228.652	2230.79	589.452	0.294538	0.297051	0.500503	0.388726	0.56174	0.420866
	58.1848	0.834042	398.754	2859.06	775.658	23.3981	0.799186	208.131	2177.96	562.066	0.28429	0.209101	0.577577	0.355615	0.558985	0.420656
	89.5737	0.813357	324.445	2409.73	690.334	31.0408	0.796021	169.817	2035.42	517.769	0.256437	0.238391	0.572006	0.365551	0.545542	0.43029
	88.5475	0.815491	380.807	2824.19	790.142	62.4118	0.792786	218.445	2073.23	577.267	0.371858	0.235888	0.55216	0.364979	0.554462	0.422388
	79.4857	0.716227	403.583	2853.75	1062.27	39.2686	0.777483	244.977	2279.85	648.656	0.332146	0.370382	0.446018	0.410767	0.537731	0.42456
test_2022_05_06_17_56	127.108	0.785556	277.132	2356.83	705.522	93.4628	0.78078	171.353	2075.31	574.308	0.429671	0.276093	0.505778	0.383128	0.491947	0.441702
test_2022_05_06_17_57	119.56	0.775795	285.61	2527.94	781.933	103.399	0.781358	196.438	2094.71	603.001	0.462139	0.288495	0.486795	0.391058	0.514593	0.438178
	95.7504	0.764774	284.499	2621.03	813.526	81.0499	0.785806	156.675	1984.58	536.52	0.459674	0.300343	0.461476	0.396964	0.505953	0.441533
	112.156	0.788235	294.669	2561.95	753.065	69.8043	0.800408	144.589	1935.79	492.995	0.392006	0.266478	0.494811	0.386853	0.509349	0.436007
	117.757	0.782174	266.603	2355.69	707.286	77.289	0.789913	153.242	1865.96	503.536	0.405016	0.278501	0.492064	0.38914	0.527696	0.434487
	90.7823	0.765544	298.577	2554.33	801.054	59.5571	0.815004	124.664	2025.16	461.953	0.402988	0.288475	0.481471	0.394529	0.495233	0.43831
	79.2759	0.71742	303.696	2626.13	926.047	53.119	0.792998	149.305	1991.19	516.399	0.406532	0.358108	0.438516	0.412805	0.498964	0.439538
	106.891	0.795904	285.584	2167.38	647.598	61.9771	0.791841	156.372	1952.18	509.491	0.370887	0.259043	0.537627	0.37188	0.526202	0.436064
	101.064	0.790018	296.85	2413.83	720.508	55.4915	0.820828	137.404	2090.28	468.792	0.362648	0.257338	0.511905	0.383246	0.518092	0.432146
	75.9202	0.811819	303.226	2474.08	691.661	60.4264	0.812391	136.447	1978.93	469.677	0.428698	0.232862	0.540439	0.372402	0.511786	0.435103
	77.7357	0.779153	302.826	2440.58	734.626	44.2952	0.828587	105.263	1941.06	409.168	0.375903	0.267745	0.527207	0.382995	0.491598	0.438974
	128.299	0.815248	289.184	2331.19	651.737	70.241	0.795756	165.461	1922.98	515.879	0.357218	0.233467	0.546675	0.36886	0.541405	0.431782
	137.751	0.808267	276.188	2090.64	607.577	79.2712	0.806774	164.493	1919.67	494.432	0.368719	0.237877	0.57963	0.363695	0.552452	0.426964
	98.7424	0.798765	294.543	2271.71	672.639	59.8704	0.818212	150.605	2038.23	476.25	0.388776	0.248178	0.549873	0.373315	0.526518	0.428218
	103.956	0.792669	309.957	2377.26	712.138	71.0655	0.816173	142.03	1798.83	441.31	0.417925	0.255062	0.535901	0.377633	0.558873	0.424037
	95.9853	0.780269	310.068	2541.01	778.408	55.0824	0.796466	158.494	1889.34	496.695	0.374673	0.276293	0.500523	0.388198	0.541733	0.431371
	138.733	0.766442	322.621	2540.83	819.315	98.1388	0.775981	161.78	2078.78	584.708	0.424372	0.302766	0.495622	0.392505	0.474318	0.447058
	83.034	0.779549	323.089	2675.05	807.197	50.4738	0.811691	162.482	2013.18	494.886	0.380969	0.273137	0.494094	0.386396	0.533238	0.427242
	115.099	0.788768	337.931	2423.05	758.161	59.6513	0.803476	167.792	1907.9	487.503	0.347866	0.26454	0.53946	0.378635	0.554881	0.422967
	61.559	0.781379	296.27	2492.93	734.168	49.459	0.797852	212.604	1963.12	538.682	0.437444	0.275481	0.503755	0.38091	0.582399	0.418838
	82.669	0.786063	317.538	2436.48	728.857	62.7034	0.78994	187.484	1781.83	501.1	0.431423	0.271931	0.531677	0.377646	0.588061	0.417111
	70.5561	0.785848	329.986	2770.5	829.478	46.9854	0.795851	214.951	1959.74	541.688	0.402046	0.270282	0.503802	0.385124	0.581345	0.419292
	63.7964	0.798035	332.236	2462.92	729.782	38.0059	0.818246	155.513	1873.95	446.347	0.373491	0.246939	0.554289	0.372501	0.563617	0.417086
	85.3248	0.821336	295.274	2271.54	629.792	53.906	0.811058	174.001	1884.43	478.646	0.384355	0.220501	0.575996	0.361632	0.578227	0.416415
	78.7956	0.797471	328.129	2632.93	771.686	44.6635	0.800318	165.304	1744.74	465.188	0.364821	0.254189	0.526974	0.375494	0.578021	0.420879
	87.5431	0.796896	349.106	2668.67	796.859	35.8073	0.823703	173.085	2118.02	495.789	0.297441	0.247893	0.523027	0.379247	0.535452	0.420366
	81.3149	0.758135	312.682	2469.2	807.454	48.8593	0.80492	145.24	1955.26	483.298	0.367334	0.302549	0.514195	0.391164	0.524365	0.43134
	82.8947	0.783654	329.165	2519.76	771.186	43.7735	0.811392	177.395	2008.58	500.986	0.346908	0.267562	0.531683	0.378304	0.544531	0.421851
	74.1988	0.782981	357.02	2731.7	836.874	36.8351	0.813153	179.319	1962.17	495.318	0.334754	0.267846	0.511353	0.383992	0.56064	0.420307
	75.6037	0.772718	344.736	2482.71	804.725	35.8433	0.80488	170.556	1898.36	482.17	0.326397	0.284482	0.521232	0.385842	0.568077	0.419421
	69.6201	0.800357	334.257	2563.75	747.514	29.4347	0.821853	135.797	1916.63	433.379	0.308304	0.245939	0.545276	0.372587	0.520985	0.423209
	77.2382	0.783509	338.294	2557.59	790.975	46.3255	0.834553	152.437	1973.56	440.911	0.374298	0.259798	0.524521	0.383828	0.545895	0.417108
	73.1457	0.795962	300.916	2348.96	686.27	57.9865	0.815521	162.241	2066.15	497.393	0.429892	0.250925	0.546377	0.373613	0.528647	0.428279
	90.2481	0.79833	270.626	2235.38	636.796	58.0407	0.803017	156.031	1958.65	495.433	0.419766	0.25172	0.547457	0.372314	0.514904	0.431764
test_2022_05_06_18_04	71.3321	0.775912	285.867	2682.13	782.695	78.1879	0.785856	185.832	2270.8	617.398	0.525666	0.286206	0.481638	0.389772	0.46902	0.444076
test_2022_05_06_18_05	68.9646	0.770165	305.112	2641.89	793.621	65.584	0.798863	191.415	2347.69	611.042	0.517415	0.288172	0.500649	0.389258	0.474939	0.438998
	98.7331	0.789325	340.147	2592.3	798.512	84.3722	0.747942	239.962	2122.73	688.671	0.464729	0.28475	0.511539	0.383996	0.514165	0.443588
	84.1343	0.795436	323.925	2662.1	776.469	74.3519	0.777592	221.75	2213.87	638.588	0.486967	0.264524	0.50966	0.38207	0.512877	0.435841
	71.1966	0.800587	326.918	2703.19	766.848	59.5651	0.784182	182.071	2227.44	603.35	0.478328	0.255917	0.513011	0.374795	0.478159	0.444109
	89.1262	0.774893	347.169	2796.95	862.878	70.6602	0.778261	190.828	2195.98	618.696	0.457006	0.29137	0.475104	0.389724	0.485885	0.44334
	93.5242	0.772511	330.946	2782.47	858.08	88.7785	0.805672	175.347	1971.22	512.866	0.494867	0.283624	0.472678	0.391506	0.542681	0.428465
	77.6956	0.780289	316.346	2570.68	781.2	71.2904	0.784281	209.098	2214.67	624.343	0.493254	0.281789	0.499283	0.387577	0.510454	0.439071
	56.5974	0.786531	293.94	2493.99	720.071	63.6767	0.81041	155.62	2337.01	550.82	0.550525	0.264682	0.518165	0.379807	0.475256	0.440981
	64.708	0.793152	311.447	2619.65	752.183	70.7996	0.792462	182.877	2229.6	591.502	0.534836	0.261779	0.511435	0.38126	0.497819	0.43931
	59.5303	0.78289	288.874	2571.27	745.418	58.2602	0.795549	166.518	2208.13	568.497	0.509949	0.274059	0.500737	0.384113	0.486398	0.442249
	70.2475	0.784099	310.413	2861.65	821.398	73.7017	0.789497	206.128	2145.85	586.321	0.522778	0.274904	0.483263	0.387146	0.520732	0.432609
	118.576	0.829104	324.568	2527.71	685.858	90.2857	0.778402	215.989	2192.07	634.368	0.442311	0.220015	0.55658	0.362711	0.516846	0.437587
	61.514	0.800451	327.813	2710.39	768.004	45.236	0.813908	133.449	2218.15	505.298	0.461471	0.246971	0.527376	0.378589	0.470396	0.442418
	84.2676	0.759164	309.731	2561.5	822.48	60.5915	0.786038	191.454	2016.5	568.112	0.426239	0.308348	0.489009	0.393354	0.537576	0.436051
	66.0233	0.783258	321.82	2722.28	797.358	73.0349	0.804487	173.323	2166.66	548.593	0.52662	0.271288	0.503339	0.386371	0.497674	0.436084
	95.475	0.780343	330.793	2628.23	813.105	63.0154	0.789187	207.407	2190.84	602.628	0.408227	0.280108	0.509882	0.384131	0.516791	0.433826
	65.8845	0.774774	318.412	2531.27	785.387	50.4521	0.805225	181.119	2164.29	545.693	0.445681	0.281484	0.507863	0.386828	0.524197	0.431654
	88.2934	0.782721	319.269	2623.1	793.622	67.6206	0.782508	213.522	2022.5	589.882	0.433778	0.279641	0.506487	0.386621	0.54105	0.432451
	71.0742	0.792274	309.19	2657.99	759.427	56.2773	0.804193	161.225	2182.89	540.448	0.455334	0.259743	0.511382	0.381026	0.490467	0.438556
	56.1833	0.787477	295.39	2544.11	735.372	73.3396	0.802067	162.926	2084.9	527.983	0.578852	0.26626	0.520616	0.388316	0.497284	0.435785
	71.7509	0.772414	353.86	2775.49	865.341	61.845	0.81407	165.371	2143.42	518.799	0.479331	0.280418	0.493339	0.388803	0.51726	0.43359
	47.2407	0.780711	348.717	2891.62	861.073	47.7171	0.81679	152.97	2207.77	510.426	0.517074	0.269777	0.488744	0.387725	0.494125	0.435234
	65.8428	0.780541	309.642	2551.64	758.082	57.2751	0.795625	173.377	2275.61	584.943	0.492886	0.277486	0.50919	0.380616	0.485071	0.440553
	67.2633	0.77474	294.461	2475.9	756.535	56.8768	0.786901	188.621	2191.96	593.168	0.472921	0.287959	0.500933	0.387086	0.487806	0.439175
	54.9306	0.765117	311.314	2617.66	802.224	56.4087	0.800365	194.767	2266.77	590.498	0.523398	0.294116	0.498671	0.391766	0.504502	0.434726
	59.8155	0.767844	268.744	2186.2	671.685	59.7767	0.789799	228.796	2062.7	590.352	0.512018	0.295508	0.526642	0.382954	0.541335	0.426431
	48.5115	0.750291	293.183	2487.42	791.494	65.2708	0.807193	179.821	1951.37	506.39	0.579198	0.310359	0.483113	0.396651	0.556737	0.425321
	74.6997	0.776968	307.191	2414.14	747.715	66.9898	0.792022	171.781	2058.39	548.435	0.487184	0.28308	0.516895	0.385159	0.516474	0.439348
	93.7326	0.771469	345.432	2529.92	827.558	74.6434	0.805086	202.961	2098.57	558.513	0.45247	0.284429	0.514434	0.388174	0.538312	0.426126
	65.0512	0.786929	355.645	2736.07	827.051	55.4245	0.807675	171.218	2076.25	520.4	0.46532	0.265286	0.5158	0.382463	0.522648	0.429745
	65.632	0.771617	361.156	2746.76	857.051	42.5135	0.810883	189.559	2132.33	534.771	0.410846	0.282477	0.516449	0.384931	0.532931	0.425112
	49.3406	0.758676	355.074	2900.51	901.908	44.712	0.811055	192.995	2217.37	554.127	0.480802	0.29785	0.480021	0.393572	0.518605	0.42894
	65.3358	0.782255	356.697	2708.94	829.388	50.584	0.789918	240.366	2029.17	598.449	0.446452	0.277174	0.505333	0.383112	0.576262	0.425359
	67.3862	0.781527	359.064	2858.4	855.218	59.6796	0.806855	178.317	2154.91	538.825	0.43772	0.271938	0.505858	0.382821	0.513354	0.43308
	57.049	0.78893	415.993	3113.46	949.109	38.2411	0.801171	170.124	2091.71	526.98	0.412081	0.265852	0.504238	0.384286	0.530208	0.430758
	39.8816	0.77965	360.043	2793.49	851.552	24.2951	0.823973	156.178	2273.14	498.758	0.398558	0.269997	0.507639	0.386432	0.488784	0.432327
	52.875	0.80617	395.903	3141.29	882.249	35.227	0.785963	179.544	2151.57	574.456	0.410882	0.24998	0.520572	0.376567	0.518691	0.437832
	70.2304	0.814935	317.817	2498.92	679.903	44.6391	0.810816	193.85	2293.41	562.302	0.412213	0.228932	0.559203	0.362131	0.519145	0.428095
	56.2545	0.780539	294.355	2420.15	710.741	69.5168	0.810171	155.578	2146.48	518.406	0.555537	0.271395	0.537998	0.38115	0.504741	0.435988
	53.5734	0.764633	310.774	2570.72	792.305	35.0629	0.802321	170.187	2121.11	525.453	0.407184	0.295666	0.507676	0.38225	0.515295	0.429804
	44.0481	0.788509	336.231	2836.92	808.486	29.9346	0.821379	168.348	2264.54	516.043	0.424165	0.259152	0.514786	0.378914	0.497067	0.427251
	68.6124	0.767876	367.022	2883.22	907.704	42.6006	0.820041	182.842	1970.82	485.683	0.390079	0.283332	0.48616	0.388298	0.56078	0.417889
	42.3487	0.776126	365.958	3079.38	893.057	28.0714	0.815227	200.282	2169.36	535.829	0.415095	0.277657	0.484342	0.383871	0.548005	0.420741
	41.4637	0.792997	374.695	3055.1	832.82	25.1336	0.804792	199.31	2274.35	570.551	0.385422	0.259169	0.526247	0.373493	0.513595	0.432244
	37.3149	0.785349	386.108	2780.66	827.996	23.4682	0.818009	187.039	2395.32	552.403	0.401947	0.264162	0.5489	0.37512	0.511699	0.425313
	53.0224	0.787905	345.017	2770.36	805.196	40.9382	0.81248	185.214	2054.99	510.559	0.449903	0.2643	0.524616	0.379719	0.542921	0.423091
	22.5404	0.751067	353.684	3087.09	954.502	18.7075	0.817656	179.758	2373.15	535.603	0.461073	0.308603	0.467779	0.397738	0.502209	0.426706
	42.909	0.80539	376.299	3194.23	862.165	22.9493	0.835935	160.366	2281.8	475.715	0.365921	0.234386	0.514258	0.373688	0.520733	0.420146
test_2022_05_06_18_08	51.3764	0.801769	297.986	2554.43	706.247	53.8591	0.791605	164.431	1884.67	508.736	0.518156	0.25115	0.530581	0.373052	0.537729	0.43374
test_2022_05_06_18_09	46.8399	0.757941	309.329	2599.84	820.769	57.6909	0.814081	173.47	1968.94	492.433	0.557992	0.299468	0.484743	0.395056	0.555642	0.426305
	60.1538	0.783442	322.93	2501.57	763.881	66.6446	0.784303	173.248	2049.77	561.532	0.53379	0.279029	0.519566	0.383631	0.50968	0.43836
	48.2008	0.799324	258.525	2384.66	658.211	79.7008	0.808901	182.337	2035.11	522.327	0.62424	0.248676	0.514293	0.379768	0.553649	0.427283
	58.9206	0.734	332.535	2746.4	938.002	100.53	0.796797	154.837	2048.56	530.953	0.62995	0.333984	0.451568	0.407334	0.506254	0.441637
	55.5966	0.780195	290.961	2571.17	753.49	65.2552	0.778042	181.438	2016.39	568.846	0.546736	0.284668	0.493797	0.38631	0.523308	0.438479
	64.1581	0.79927	291.37	2460.37	696.397	67.2675	0.775583	185.963	2015.98	579.887	0.518159	0.258973	0.533198	0.376399	0.526549	0.443068
	69.6976	0.787746	297.556	2378.89	707.046	70.4605	0.797477	202.733	2043.96	562.753	0.507306	0.267271	0.531801	0.379935	0.549289	0.430676
	54.6422	0.770837	286.698	2548.2	772.917	59.6422	0.781251	200.333	1977.06	563.352	0.510484	0.294044	0.502724	0.388792	0.538289	0.430341
	57.0776	0.786008	288.2	2584.24	752.742	62.8595	0.783846	191.348	1934.25	551.492	0.527616	0.275292	0.512717	0.385555	0.549526	0.432357
	77.731	0.813829	294.883	2393.85	661.945	74.5163	0.806039	183.96	1937.72	512.431	0.489956	0.230857	0.56053	0.368069	0.559332	0.425983
	73.5467	0.790319	322.877	2514.95	756.206	70.98	0.777674	215.272	2045.25	608.347	0.496298	0.271188	0.521606	0.381895	0.546503	0.437149
	65.281	0.815332	300.386	2448.94	674.315	56.7522	0.791959	199.554	2114.61	575.63	0.46558	0.235118	0.545131	0.36927	0.540539	0.431348
	76.8595	0.822567	316.226	2526.85	686.292	57.087	0.783962	169.395	1781.72	501.887	0.429898	0.227903	0.553867	0.363655	0.553968	0.430057
	69.5925	0.810483	278.466	2271.9	614.854	52.2973	0.79734	188.643	2117.37	560.504	0.436452	0.237827	0.582338	0.356282	0.524397	0.435878
	68.7524	0.789032	281.535	2196.55	659.319	65.3286	0.794347	184.758	1882.95	519.772	0.492855	0.267669	0.553921	0.373273	0.560269	0.427017
	73.2116	0.797785	340.417	2575.61	762.205	63.254	0.793899	152.627	1824.53	476.682	0.468802	0.255135	0.519907	0.376363	0.556264	0.428474
	67.1504	0.8045	310.164	2641.7	735.511	65.2117	0.799643	189.22	1817.57	501.372	0.497336	0.246285	0.523399	0.376256	0.577081	0.420687
	61.1202	0.778673	282.127	2418.3	727.119	59.1841	0.785653	172.603	1867.48	519.035	0.500729	0.283819	0.513055	0.386843	0.552219	0.432184
	55.6042	0.765338	312.196	2861.27	866.126	67.4333	0.784285	197.63	1903.67	548.343	0.551561	0.300522	0.463141	0.392666	0.557842	0.428621
	71.798	0.778083	321.514	2663.94	806.553	61.7088	0.797207	191.584	1935.82	527.727	0.474071	0.278402	0.505016	0.386537	0.562724	0.426266
	65.8855	0.77736	320.655	2675.23	801.643	60.5843	0.812055	166.856	2026.03	507.67	0.47797	0.274154	0.498657	0.387402	0.545062	0.432706
	54.123	0.80588	314.388	2563.17	717.144	41.9481	0.800447	178.368	1963.84	515.039	0.443273	0.244265	0.548372	0.366902	0.540856	0.429672
	60.8157	0.780008	301.946	2512.84	749.361	56.2304	0.799055	189.246	1915.21	514.834	0.473561	0.277842	0.522997	0.377508	0.542045	0.423086
	60.1483	0.810206	340.665	2939.87	794.364	58.8052	0.799532	173.766	2002.98	526.362	0.483948	0.237806	0.508401	0.373955	0.546852	0.431699
	62.2427	0.795031	338.392	2904.4	832.34	53.3454	0.812835	175.532	1910.79	486.956	0.468013	0.253068	0.502635	0.380164	0.568583	0.422912
	53.704	0.78643	335.857	2602.65	779.952	39.7578	0.803631	186.147	1833.6	484.991	0.425577	0.267876	0.532794	0.378705	0.583017	0.416548
	50.0602	0.734867	352.699	2964.21	995.531	42.7917	0.791147	194.494	1921.83	533.062	0.460973	0.336173	0.442798	0.403911	0.582267	0.424913
	45.7451	0.780588	382.063	2864.82	903.954	31.5529	0.808401	193.638	2071.68	515.482	0.418133	0.275455	0.501587	0.388729	0.544383	0.419398
	44.0213	0.790548	364.822	3025.06	872.958	37.8766	0.786283	193.798	1978.91	542.084	0.454926	0.269774	0.498367	0.38219	0.533123	0.430251
	66.9649	0.798201	346.62	2692.11	773.751	38.4825	0.819211	168.37	1956.47	472.483	0.371787	0.246628	0.537705	0.370692	0.55345	0.419556
	59.3889	0.746949	321.551	2566.52	848.977	96.4722	0.816821	165.083	1922.57	476.384	0.580683	0.310546	0.492115	0.396639	0.55924	0.425255
	52.4202	0.823978	321.32	2690.28	692.593	43.4049	0.806608	166.153	1929.77	482.092	0.451218	0.219381	0.557849	0.361278	0.536963	0.424656
	52.2158	0.731972	298.542	2789.69	921.332	138.178	0.79396	163.64	1723.8	473.765	0.673244	0.339061	0.44091	0.407116	0.57997	0.423683
	68.3425	0.799332	310.707	2561.67	739.839	80.8927	0.80737	185.321	1789.13	482.587	0.544165	0.25008	0.532011	0.378503	0.586128	0.418013
	57.6509	0.769499	314.536	2549.77	793.816	93.5126	0.808821	157.588	1891.33	477.154	0.564284	0.285406	0.511198	0.389021	0.549895	0.427836
	46.2982	0.802223	276.578	2206.85	632.377	53.0843	0.809462	155.845	1988.92	489.021	0.536742	0.244447	0.576134	0.366926	0.531809	0.432504
	42.7958	0.778864	294.923	2697.42	796.162	71.0576	0.780896	191.961	1843.84	540.529	0.621342	0.283926	0.465429	0.392547	0.572441	0.431779
	57.3103	0.778875	306.734	2491.02	748.751	59.9253	0.802556	210.577	2184.18	584.341	0.513706	0.276665	0.515185	0.38426	0.538135	0.427333
	50.8052	0.797299	282.948	2227.65	637.997	61.1835	0.797809	189.679	1950.56	526.192	0.547805	0.255472	0.550432	0.366399	0.561621	0.426452
	56.0519	0.801361	321.355	2528.82	720.68	72.3111	0.794099	211.751	2044.25	569.226	0.565712	0.250811	0.539582	0.371391	0.561686	0.426872
	59.0274	0.770296	320.121	2578.72	801.125	80.3726	0.785097	183.83	1946.84	550.559	0.562106	0.293498	0.495098	0.387403	0.523993	0.43587
	54.9162	0.814417	297.08	2371.72	651.517	63.5447	0.802299	175.664	2042.9	529.444	0.53174	0.232304	0.57078	0.360272	0.520416	0.432066
	58.8478	0.792603	308.846	2566.51	733.373	52.3877	0.813075	133.255	2025.41	472.287	0.504719	0.257377	0.537326	0.377438	0.513242	0.437764
	41.3382	0.784969	311.045	2451	710.04	41.9465	0.835297	174.695	1900.49	442.34	0.50719	0.258634	0.552271	0.369374	0.604934	0.406706
	46.1365	0.798859	324.522	2494.66	718.412	45.0167	0.821554	168.328	2047.93	485.53	0.484653	0.245363	0.566602	0.366371	0.563871	0.422122
	49.7607	0.803326	349.961	2734.53	775.372	37.6182	0.805019	183.71	1916.05	496.813	0.434848	0.246162	0.53527	0.374146	0.573384	0.41917
	50.1694	0.804408	348.693	2623.08	754.666	55.3643	0.811668	190.216	1960.29	500.89	0.496174	0.242395	0.553506	0.369309	0.580363	0.419373
	48.336	0.832472	384.833	2765.82	751.73	36.6761	0.793361	161.044	1760.21	469.924	0.430593	0.211637	0.587683	0.359232	0.581717	0.423888
	40.3209	0.796532	321.233	2587.58	738.945	49.3881	0.806433	204.927	1925.22	502.222	0.552686	0.254106	0.547694	0.373935	0.594373	0.411123
	47.7131	0.812665	349.183	2875.61	781.994	43.377	0.78294	174.338	1730.99	491.952	0.47855	0.240819	0.541882	0.370841	0.599548	0.422959
	46.4113	0.816189	379.122	2778.88	789.422	33.5844	0.81288	191.688	1984.49	500.791	0.419934	0.226468	0.558481	0.367442	0.596957	0.415416
test_2022_05_06_18_12	38.9228	0.787997	343.294	2836	825.841	69.8216	0.809482	155.008	1925.92	479.15	0.648482	0.262357	0.522791	0.381892	0.544836	0.429835
test_2022_05_06_18_13	42.7286	0.812014	300.079	2715.76	716.715	86.7832	0.777487	166.708	1808.42	517.798	0.66479	0.241756	0.543222	0.367729	0.556583	0.435809
	42.6544	0.768802	322.602	2758.99	850.204	75.7157	0.801366	179.179	1882.25	503.405	0.64613	0.289008	0.488194	0.392925	0.574656	0.423932
	45.5249	0.819529	294.724	2613.03	672.187	70.4626	0.800798	166.416	1930.31	505.429	0.621892	0.227029	0.552033	0.364023	0.545265	0.431074
	33.5904	0.814184	326.502	2840.77	743.226	66.1327	0.821239	129.271	1988.23	450.328	0.678441	0.227233	0.546617	0.368311	0.511484	0.434632
	36.4421	0.802473	355.941	2794.9	769.092	69.5793	0.823823	132.48	1985.67	445.949	0.673569	0.239591	0.541856	0.369419	0.516274	0.432737
	36.5019	0.809154	344.88	2802.54	757.913	63.393	0.818617	131.996	1884.05	436.485	0.649735	0.23344	0.530431	0.371059	0.523246	0.432099
	40.3564	0.783859	337.86	2758.71	809.442	80.2566	0.808383	161.465	1973.05	495.501	0.677062	0.268095	0.518662	0.383682	0.534294	0.431728
	43.5058	0.820516	360.051	2920.76	778.919	69.7312	0.807068	139.048	1983.28	483.913	0.629846	0.223119	0.548378	0.366146	0.513128	0.437646
	40.0334	0.755422	301.072	2669.25	826.766	75.7685	0.802837	145.142	1964.26	489.572	0.664058	0.304729	0.485832	0.392553	0.530268	0.437455
	44.2705	0.809349	321.071	2708	742.85	67.8932	0.813631	154.684	2061.34	497.951	0.615829	0.234732	0.542179	0.371767	0.513236	0.434199
	37.5	0.79705	297.597	2575.15	678.763	74.637	0.803182	147.568	1911.34	480.306	0.656902	0.253223	0.569862	0.366457	0.532381	0.433824
	43.9167	0.813636	302.378	2621.5	697.615	93.1218	0.790039	175.721	1891.65	525.174	0.67635	0.235859	0.557451	0.366625	0.555996	0.434695
	43.8908	0.767176	371.954	3057.68	952.937	63.1463	0.822059	132.303	1901.79	436.298	0.602312	0.28466	0.475671	0.394167	0.535618	0.430333
	33.5094	0.777678	367.95	3068.15	894.303	51.4195	0.816459	153.504	1992.46	478.424	0.622651	0.274222	0.503127	0.385716	0.52997	0.431772
	33.7202	0.760042	336.544	2859.05	881.3	55.0325	0.82296	136.89	1921.09	434.044	0.631586	0.293883	0.490871	0.391603	0.544083	0.426808
	40.9972	0.798772	333.006	2691.09	758.418	61.7514	0.82884	146.48	1965.51	447.086	0.612706	0.243727	0.545211	0.372208	0.54478	0.429388
	39.5283	0.804004	363.387	2882.26	810.536	52.2432	0.831988	129.777	1900.66	412.169	0.59098	0.236623	0.538197	0.372948	0.533104	0.427459
	36.3248	0.741699	371.46	3088.22	1018.95	50.2009	0.826541	114.231	1965.73	424.998	0.601534	0.314148	0.457673	0.401346	0.511558	0.436038
	35.9959	0.769858	382.778	3264.31	997.342	48.7265	0.821163	147.64	2170.64	493.899	0.589675	0.282281	0.447834	0.391741	0.502851	0.435682
	32.4231	0.799393	341.944	2841.96	788.765	51.6087	0.824728	122.17	1992.22	433.852	0.628765	0.244487	0.535109	0.375199	0.497758	0.435605
	31.7559	0.786055	332.903	2825.03	797.397	57.9676	0.80133	144.534	1956.29	487.956	0.650834	0.268197	0.510226	0.383554	0.526555	0.437062
	42.6808	0.807887	341.875	2925.57	794.702	63.3208	0.806706	164.267	1987.66	502.827	0.595553	0.23886	0.533412	0.372778	0.538907	0.431115
	39.6777	0.787707	332.066	2712.26	775.274	64.1584	0.818871	150.87	1891.7	453.758	0.63399	0.2591	0.528808	0.37806	0.542516	0.427519
	56.2993	0.752717	362.934	2804.55	929.294	68.5109	0.807808	153.111	1772.67	453.729	0.555418	0.306207	0.497193	0.395679	0.569621	0.425084
	29.2765	0.748752	327.724	2512	815.196	46.0353	0.818547	149.264	2075.12	478.973	0.622249	0.307444	0.522041	0.395444	0.516417	0.430323
	41.8534	0.773437	369.937	2812.86	881.634	55.6514	0.808286	174.214	1955.21	504.306	0.574097	0.281916	0.51118	0.38667	0.561316	0.427224
	38.623	0.799856	381.447	3002.02	852.656	48.0213	0.814331	179.121	2061.48	507.572	0.563242	0.24605	0.541867	0.376465	0.53836	0.426144
	31.085	0.813866	358.397	2969.7	792.046	41.0567	0.842205	138.523	2121.62	432.398	0.575556	0.221959	0.552032	0.368589	0.52206	0.420595
	47.5347	0.79253	341.666	2697.92	762.561	107.486	0.803433	184.043	2072.89	543.289	0.623617	0.258731	0.549687	0.372505	0.540402	0.432558
	40.4406	0.800523	333.019	2663.08	745.451	43.3924	0.822267	148.275	1852.34	432.704	0.526187	0.242074	0.551661	0.371794	0.561551	0.419575
	39.1627	0.803124	355.511	2949.13	810.218	45.3732	0.818225	139.95	1732.61	419.848	0.537265	0.24073	0.532176	0.373931	0.570121	0.42192
	26.4628	0.806831	329.471	2899.99	746.651	34.3036	0.838714	130.347	2081.84	426.656	0.580906	0.231621	0.540617	0.367084	0.51283	0.424826
	26.4162	0.769411	330.969	2800.52	843.628	33.7654	0.824806	136.443	2027.31	444.673	0.577985	0.280964	0.504647	0.390226	0.514798	0.426105
	30.7045	0.796489	386.959	2951.46	835.677	34.6455	0.836228	127.798	2061.76	426.222	0.545624	0.244289	0.54007	0.374943	0.521638	0.427132
	29.7934	0.808821	366.319	2950.05	796.546	34.4749	0.835023	129.662	1933.38	408.141	0.56252	0.229665	0.538122	0.372656	0.542717	0.424274
	30	0.798871	363.453	2832.43	789.867	28.5697	0.854134	109.985	1977.61	364.005	0.504139	0.236229	0.555136	0.368925	0.549503	0.417071
	24.7094	0.776175	340.038	2983.14	858.836	29.3068	0.826194	146.743	2032.23	453.057	0.550982	0.272969	0.50946	0.383082	0.525998	0.423762
	23.3358	0.775225	348.393	3004.05	870.339	39.5547	0.839315	124.889	1796.21	379.005	0.628289	0.268833	0.492828	0.388957	0.559558	0.414356
	23.6844	0.795232	337.351	3004.28	814.895	39.0851	0.80527	161.714	1977.31	491.386	0.616582	0.257756	0.516331	0.378242	0.544074	0.426544
	28.1046	0.767302	356.134	2963.04	883.368	34.2062	0.806081	182.457	1831.03	476.733	0.55384	0.291355	0.515177	0.389906	0.57716	0.416405
	26.7486	0.766139	353.345	2925.85	886.388	26.7351	0.827648	159.259	2082	464.229	0.512098	0.284195	0.506926	0.390743	0.537311	0.420347
	24.7809	0.807241	369.464	3106.45	834.745	35.868	0.813064	165.276	1868.35	465.796	0.596138	0.237766	0.522123	0.37504	0.583655	0.420997
	24.787	0.787691	410.531	3424.03	960.476	27.5185	0.832975	146.294	2100.73	454.632	0.540101	0.254594	0.509104	0.385635	0.544013	0.425373
test_2022_05_06_18_16	53.7413	0.804364	286.62	2464.25	676.623	72.205	0.772935	230.239	2054.48	623.338	0.58104	0.253902	0.534487	0.371364	0.531909	0.435258
test_2022_05_06_18_17	54.7778	0.797458	289.163	2576.97	727.151	71.7432	0.777885	198.597	2005.77	586.809	0.57134	0.26136	0.515071	0.375826	0.530779	0.437466
	46.8486	0.788265	285.628	2507.19	710.141	61.8675	0.788162	156.234	2022.42	541.713	0.578841	0.270649	0.515551	0.379799	0.494009	0.44695
	48.2783	0.772008	289.493	2487.72	743.231	69.7637	0.78044	167.66	2026.9	560.65	0.593859	0.293133	0.501095	0.387884	0.503758	0.44305
	58.0796	0.76976	264.788	2366.93	706.358	73.8962	0.805738	166.082	1929.52	499.175	0.567512	0.286446	0.50783	0.388249	0.543596	0.432799
	53.0686	0.784939	290.28	2787.23	793.124	66.5083	0.781789	189.19	2050.61	583.572	0.559344	0.276667	0.468218	0.388031	0.535673	0.441099
	58.5908	0.788585	291.99	2454.34	726.324	59.0951	0.770256	187.143	2018.07	589.478	0.512901	0.275909	0.510155	0.382614	0.518767	0.44249
	52.6213	0.781893	263.291	2147.58	649.167	67.1036	0.76106	202.197	1800.25	566.852	0.559353	0.288936	0.538471	0.380313	0.560414	0.433464
	48.8027	0.807373	285.736	2487.53	678.753	73.4784	0.819919	164.814	1849.29	458.33	0.607124	0.235419	0.523019	0.372601	0.566563	0.419888
	44.0568	0.798356	279.862	2218.01	634.763	70.6681	0.807142	192.313	1971.35	522.186	0.619429	0.249454	0.555633	0.367742	0.562846	0.422822
	42.9781	0.757547	258.415	2346.92	722.986	76.4973	0.798649	185.313	1791.67	496.977	0.638668	0.30478	0.477664	0.397147	0.587313	0.421706
	60.2101	0.782602	304.343	2288.18	710.108	81.0156	0.806408	188.085	1889.93	504.443	0.581612	0.271597	0.546078	0.381561	0.576816	0.422825
	43.8136	0.78659	310.383	2509.68	746.275	66.0068	0.806224	188.191	1999.77	514.359	0.604243	0.265366	0.511071	0.385399	0.55749	0.421986
	41.6471	0.740698	310.125	2809.66	900.525	73.2696	0.802833	192.097	1876.17	511.264	0.635088	0.325091	0.443538	0.402093	0.577423	0.42168
	46.8603	0.769395	343.761	2466.85	778.055	68.1453	0.78681	183.115	1911.02	538.765	0.590343	0.293975	0.505192	0.382837	0.553	0.434705
	46.3119	0.812996	292.415	2569.11	680.604	54.6972	0.772856	190.853	1828.07	545.801	0.537315	0.243588	0.529455	0.369776	0.554509	0.433551
	57.1528	0.786826	285.877	2668.13	751.133	57.8734	0.781373	151.732	1746.18	482.467	0.508301	0.272212	0.50664	0.384772	0.533698	0.434333
	53.8143	0.790669	306.021	2677.12	773.748	60.989	0.807171	171.692	1827.39	479.682	0.534598	0.260032	0.511328	0.3818	0.562846	0.42303
	66.5378	0.816923	294.623	2209.6	625.753	72.4709	0.784829	191.481	1940.69	552.613	0.517504	0.234337	0.569746	0.363665	0.54186	0.434724
	64.0655	0.77109	297.88	2496.17	770.896	91.6845	0.784019	188.558	1744.86	514.642	0.5856	0.292236	0.492762	0.39325	0.564996	0.42501
	58.2869	0.797368	275.999	2408.2	684.878	67.4553	0.773178	201.344	1880.68	566.991	0.539137	0.263309	0.530857	0.377994	0.550983	0.432863
	54.1281	0.802932	283.8	2551.26	699.389	59.3417	0.772085	192.732	1930.12	569.925	0.526899	0.255887	0.520681	0.377076	0.540242	0.434869
	72.2843	0.805339	292.349	2258.05	650.236	69.8978	0.788825	178.828	1856.3	517.287	0.49748	0.248995	0.566746	0.367709	0.558849	0.429896
	58.1195	0.781768	298.923	2392.18	723.349	50.4909	0.815744	158.983	1949.35	480.512	0.469932	0.268595	0.529275	0.379613	0.551482	0.427988
	61.1379	0.818203	299.84	2338.98	648.216	71.7806	0.78819	172.355	1795.8	504.761	0.5339	0.231993	0.558331	0.364963	0.562198	0.429487
	52.8539	0.808328	317.343	2590.45	720.369	36.0082	0.800857	145.831	2037.78	503.272	0.415249	0.239868	0.534311	0.368755	0.50992	0.436527
	54.0054	0.786233	311.529	2501.55	743.95	50.9049	0.814427	178.456	1963.65	496.875	0.49123	0.263272	0.53323	0.378828	0.573412	0.422189
	50.3889	0.810293	338.612	2888.87	783.401	57.6919	0.810443	183.045	1925.71	494.692	0.52658	0.235626	0.520434	0.374788	0.579246	0.420154
	54.8394	0.774916	355.086	2952.36	894.215	43.2845	0.789579	165.971	1768.42	481.772	0.449749	0.286622	0.484025	0.389353	0.580321	0.425956
	56.9757	0.788744	322.688	2630.73	779.306	44.4711	0.814735	192.589	2069.84	522.459	0.445791	0.261078	0.516833	0.380376	0.559581	0.42685
	52.4944	0.809103	302.584	2607.99	698.334	41.3139	0.787993	179.504	2025.92	554.493	0.43592	0.242461	0.546039	0.366211	0.523881	0.438544
	51.6943	0.784786	307.054	2750.51	792.716	61.4671	0.772496	190.633	1872.4	556.734	0.542178	0.27976	0.494731	0.386818	0.551248	0.435012
	60.8219	0.797058	294.646	2295.77	673.563	80.4394	0.77299	208.682	1958.1	587.357	0.545552	0.263122	0.560095	0.371127	0.555664	0.435631
	60.2263	0.802874	327.229	2691.87	754.281	55.9769	0.799743	190.137	2025.87	538.025	0.481313	0.247246	0.523256	0.375257	0.547108	0.429926
	62.0329	0.808491	335.974	2680.86	767.195	49.6901	0.801168	177.277	2043.25	525.669	0.4405	0.24028	0.536504	0.374229	0.527025	0.43019
	55.525	0.77733	310.89	2612.56	777.123	50.875	0.803871	175.772	1894.06	499.6	0.476999	0.278048	0.519183	0.38311	0.564041	0.426571
	75.1106	0.801739	307.105	2460.66	706.875	51.8479	0.794392	199.99	1826.45	519.36	0.410108	0.250814	0.548251	0.373216	0.580499	0.421951
	49.8843	0.793909	349.35	2894.05	830.762	47.5398	0.788418	174.863	1917.34	519.135	0.484825	0.262919	0.512648	0.373895	0.547107	0.430022
	46.6921	0.766764	349.563	2543.61	801.905	41.5662	0.799692	181.627	2072.84	542.37	0.480086	0.293538	0.517825	0.381242	0.544131	0.430562
	52.7006	0.7901	310.884	2597.71	754.728	55.0395	0.80528	183.44	1833.42	492.398	0.51343	0.262325	0.511649	0.378595	0.585215	0.423993
	51.7611	0.759375	332.946	2947.42	847.773	52.8614	0.790511	193.435	1903.98	535.917	0.509554	0.305212	0.495605	0.389408	0.562728	0.427214
	42.4396	0.798135	301.005	2392.98	678.383	51.0451	0.792101	179.111	1882.05	512.482	0.544207	0.255883	0.563084	0.366247	0.569995	0.426429
	38.5292	0.802027	286.743	2634.3	710.246	52.8708	0.794861	206.125	1863.23	529.682	0.583295	0.250527	0.522976	0.370272	0.573332	0.420929
	46.6102	0.792136	370.307	2976.95	849.334	56.9184	0.802416	172.227	1759.63	469.352	0.543556	0.25916	0.529596	0.377943	0.5907	0.417754
	47.9189	0.786532	362.67	2872.98	854.637	52.0933	0.79301	170.278	1975.29	526.711	0.517917	0.270549	0.503078	0.37846	0.53386	0.43523
	47.3333	0.802792	345.426	2442.77	707.644	45.8259	0.797546	221.676	1957.49	557.052	0.49375	0.247462	0.588823	0.361539	0.56813	0.424606
	53.1806	0.811127	362.749	3085.46	832.054	41.1605	0.801668	197.071	1999.64	530.906	0.435475	0.236813	0.508916	0.372824	0.559294	0.426536
	53.5718	0.794188	336.748	2926.79	817.625	51.4365	0.792559	184.238	1820.68	504.838	0.490569	0.262014	0.504834	0.379125	0.583434	0.423657
	52.5708	0.809869	343.483	2799.52	780.319	50.1394	0.793239	193.935	1877.45	523.494	0.485783	0.240245	0.539185	0.372915	0.578735	0.424657
	51.9322	0.811204	329.884	2751.94	761.216	45.3616	0.810771	189.479	2046.33	524.573	0.462774	0.23256	0.548786	0.371537	0.570664	0.424066
	43.3649	0.81839	399.597	3113.85	852.894	34.1595	0.794712	169.842	1982.14	520.758	0.44206	0.229012	0.543891	0.368669	0.551697	0.431923
	43.9128	0.774597	241.987	2287.62	673.54	84.4642	0.764035	200.448	1907.52	592.332	0.654808	0.295245	0.511038	0.387149	0.530214	0.439213
test_2022_05_06_18_23	118.606	0.782155	316.243	2617.66	805.223	78.0637	0.791169	268.537	2441.98	702.273	0.401462	0.275707	0.490422	0.390507	0.508435	0.431244
test_2022_05_06_18_25	123.673	0.789252	354.216	2717.64	835.872	70.3616	0.776194	216.007	2154.49	630.471	0.376589	0.272797	0.502386	0.386901	0.519052	0.437859
	115.528	0.779173	318.938	2565.93	789.907	76.1221	0.757044	253.604	2277.96	725.764	0.401088	0.293546	0.493759	0.387778	0.50017	0.442548
	110.969	0.77392	316.026	2567.52	805.179	71.5685	0.764797	262.31	2311.67	718.971	0.401032	0.297189	0.493007	0.391566	0.508697	0.438974
	160.738	0.791717	327.64	2609.27	788.95	111.422	0.764007	255.517	2307.43	723.845	0.414401	0.273689	0.504857	0.384634	0.509735	0.440874
	140.274	0.777151	334.116	2631.85	828.721	97.7233	0.757469	213.372	2224.51	685.186	0.415797	0.295793	0.485663	0.390252	0.487558	0.446013
	154.179	0.811765	317.914	2561.2	722.28	79.6375	0.767475	243.108	2391.3	724.428	0.348299	0.246439	0.537203	0.373475	0.488849	0.442559
	158.819	0.808249	320.59	2617.5	747.571	92.4128	0.756788	244.733	2223.1	709.547	0.373439	0.254914	0.518193	0.376576	0.511136	0.44394
	184.124	0.80689	320.666	2398.69	711.358	102.872	0.769748	247.53	2360.28	719.904	0.362962	0.251792	0.536689	0.374047	0.511066	0.441687
	130.601	0.800959	320.203	2681.98	774.167	75.6208	0.76187	219.636	2210.32	680.728	0.374631	0.262588	0.503494	0.380445	0.494318	0.446284
	164.244	0.814758	317.449	2480.39	705.173	99.7392	0.756602	261.106	2318.12	743.739	0.38058	0.245787	0.540761	0.371928	0.499762	0.443202
	127.68	0.761987	322.82	2712.01	878.179	89.4712	0.770798	237.241	2367.48	709.692	0.419126	0.310348	0.456804	0.398447	0.487124	0.44019
	133.205	0.792658	324.336	2743.03	805.155	81.7873	0.76976	225.096	2263.58	677.629	0.384398	0.271061	0.491654	0.383612	0.510872	0.440639
	121.754	0.77589	334.473	2623.5	833.524	73.0641	0.767117	195.416	2068.94	619.431	0.389984	0.29498	0.486168	0.392093	0.496026	0.442458
	179.619	0.779998	346.04	2786.81	871.528	102.72	0.738734	223.971	2163.9	710.442	0.364929	0.301748	0.483356	0.39205	0.503651	0.447337
	137.799	0.794253	348.635	2685	816.943	76.012	0.774938	230.052	2298.25	673.702	0.378265	0.267007	0.513303	0.382107	0.505113	0.439165
	132.006	0.790173	332.634	2542.85	781.925	72.9316	0.790766	185.811	2198.44	601.785	0.369915	0.265406	0.513718	0.382241	0.497973	0.441272
	148.748	0.816595	353.033	2808.12	790.885	67.8152	0.773783	203.67	2213.15	641.423	0.320727	0.23819	0.530726	0.373121	0.51182	0.443789
	131.139	0.723066	344.003	2837.52	1014.11	75.74	0.779776	216.951	2266.77	650.683	0.374085	0.357929	0.428184	0.409991	0.506695	0.438135
	155.754	0.789947	330.019	2482.01	764.045	76.7812	0.76522	202.035	2184.79	649.981	0.341259	0.275864	0.520968	0.38112	0.507276	0.444243
	154.455	0.814442	312.676	2400.99	683.885	74.1337	0.784904	220.647	2281.77	647.418	0.344827	0.237968	0.551986	0.368887	0.514894	0.437217
	168.87	0.810643	317.697	2496.05	722.874	88.016	0.778216	219.676	2184.56	640.373	0.35097	0.244098	0.53885	0.372211	0.526797	0.437782
	156.779	0.797596	340.094	2585.6	784.567	77.4786	0.776989	238.612	2219.73	657.817	0.338165	0.262083	0.521178	0.381791	0.530339	0.433858
	131.4	0.760042	341.685	2596.97	869.526	73.584	0.790071	223.269	2231.8	627.641	0.362813	0.304699	0.491115	0.395314	0.523531	0.433003
	93.3021	0.781351	364.479	2768.13	852.321	69.9532	0.782864	199.448	2221.58	617.333	0.429323	0.280531	0.503898	0.38439	0.507721	0.439151
	125.414	0.784736	345.441	2624.82	821.067	62.399	0.789224	219.358	2239.42	623.298	0.342065	0.273948	0.502822	0.384766	0.514426	0.432448
	117.64	0.777927	351.057	2847.21	885.125	51.9887	0.78495	209.824	2290.96	633.48	0.312097	0.285113	0.483788	0.388835	0.506393	0.437009
	139.973	0.812064	340.271	2672.61	762.786	65.9072	0.778356	231.423	2109.05	620.878	0.318482	0.243561	0.53152	0.373308	0.540283	0.430285
	137.746	0.765481	354.945	2651.89	872.744	75.8538	0.759165	263.608	2232.2	717.597	0.362658	0.310564	0.496039	0.394221	0.518259	0.440676
	126.227	0.768611	355.465	2839.72	911.707	63.0682	0.778797	241.58	2262.31	662.14	0.349831	0.299557	0.480414	0.391932	0.534862	0.433687
	131.991	0.825287	368.834	2759.43	762.193	61.489	0.792533	218.44	2216.19	616.308	0.325736	0.22087	0.5516	0.364783	0.524574	0.435416
	121.506	0.779822	290.092	2659.9	797.294	130.928	0.827752	166.964	2091.48	493.018	0.519073	0.266237	0.462607	0.394332	0.534992	0.423949
	116.173	0.788807	319.283	2537.81	772.813	73.566	0.786825	248.247	2164.19	637.876	0.392921	0.269832	0.510206	0.385706	0.557921	0.42828
	116.148	0.789122	325.458	2659.36	795.928	79.2088	0.783738	258.125	2225.87	665.668	0.41319	0.270185	0.499741	0.383497	0.553955	0.431978
	99.4106	0.775029	324.683	2670.61	829.014	94.094	0.801375	263.085	2290.49	647.879	0.488021	0.281562	0.483657	0.390231	0.556116	0.424278
	83.7175	0.766656	349.238	2780.85	879.833	67.631	0.795636	237.475	2228.84	623.227	0.44969	0.294764	0.488626	0.39184	0.551309	0.427227
	103.154	0.80153	335.937	2728.67	789.286	48.2202	0.805445	173.882	2026.29	512.886	0.329039	0.248317	0.517084	0.377346	0.536719	0.424544
	143.144	0.787929	346.479	2649.41	819.43	93.5625	0.792684	243.829	2180.96	631.45	0.398383	0.268568	0.507837	0.385326	0.545558	0.429131
	95.2921	0.816146	362.856	2858.32	796.036	46.5528	0.818609	180.97	2086.33	500.821	0.327722	0.224344	0.53672	0.369168	0.542332	0.418919
	110.093	0.810554	367.011	2789.32	807.388	46.2821	0.792471	235.34	2092.7	596.973	0.300336	0.240729	0.528593	0.374201	0.560752	0.424972
	119.23	0.766482	366.823	2824.5	925.301	54.5871	0.794873	264.449	2314.86	657.943	0.322999	0.295228	0.478442	0.394921	0.54198	0.426891
	120.62	0.75654	406.017	2904.59	1001.17	54.4294	0.79147	207.228	2071.51	578.227	0.319107	0.309071	0.473208	0.400387	0.550773	0.429339
	121.13	0.780477	368.398	2885.15	900.253	80.475	0.767914	253.585	2317.29	707.018	0.363882	0.289246	0.491244	0.389117	0.506524	0.438339
	123.167	0.813206	370.947	2845.94	812.363	54.3824	0.791369	283.019	2274.08	668.301	0.315399	0.238123	0.535596	0.371324	0.562648	0.423901
	93.3519	0.78525	419.478	3224.46	986.604	44.9785	0.80878	239.869	2327.14	608.321	0.335219	0.266473	0.479801	0.384836	0.551454	0.423079
	88.622	0.826678	418.052	3230.97	880.684	40.2332	0.796341	221.644	2175.4	584.693	0.318787	0.218461	0.528225	0.368207	0.561012	0.423464
	77.7748	0.771502	432.03	3156.57	1021.57	35.2387	0.798344	218.26	2254.83	601.612	0.318833	0.288562	0.477272	0.393312	0.533048	0.429491
	86.4674	0.818318	412.206	3130.62	872.37	39.3333	0.798755	243.802	2273.15	629.411	0.313162	0.228349	0.533449	0.366485	0.551872	0.429333
	95.9468	0.793375	368.384	2761.96	843.584	49.9131	0.796219	236.376	2308.64	639.685	0.34595	0.26026	0.510693	0.383044	0.535434	0.431371
	89.4978	0.804039	360.893	2588.31	771.685	41.9665	0.816696	184.415	2281.01	543.825	0.31197	0.240621	0.559663	0.372514	0.515159	0.427178
	107.394	0.804221	387.444	2863.65	848.572	47.3716	0.783209	254.8	2234.87	647.116	0.31038	0.251318	0.521843	0.376563	0.560835	0.427608
	92.7444	0.800977	389.535	2898.21	858.601	57.6211	0.783016	244.029	2187.06	624.668	0.372368	0.257065	0.522728	0.377512	0.553733	0.424585
	80.8883	0.772801	468.209	3393.03	1103.14	44.1702	0.79317	273.249	2235.73	646.598	0.350616	0.288984	0.468898	0.392233	0.568476	0.425239
	87.2127	0.79728	382.781	3133.24	920.008	38.3815	0.811429	252.268	2239.46	596.543	0.30876	0.251656	0.495811	0.381968	0.580217	0.415284
	85.3302	0.822174	386.618	2917.18	803.555	35.3994	0.808688	200.21	2135.16	539.243	0.300627	0.220467	0.551095	0.366116	0.551656	0.422181
	65.9134	0.803356	431.353	3216.51	935.739	30.13	0.818024	230.15	2356.17	582.965	0.320105	0.242788	0.50744	0.379541	0.555413	0.416392
	95.2312	0.775927	423.246	2993.24	971.788	41.1694	0.77384	251.608	2127.05	638.345	0.303492	0.291429	0.492113	0.389728	0.563513	0.428575
	101.229	0.798249	335.27	2693.15	785.974	57.3271	0.798652	215.835	2292.55	609.147	0.373377	0.253175	0.51581	0.380267	0.523967	0.429667
	127.775	0.759789	340.883	2685.42	886.081	86.4813	0.790656	232.952	2278.38	650.657	0.408128	0.304948	0.477196	0.397604	0.528728	0.434111
test_2022_05_06_18_31	112.067	0.832004	299.189	2359.64	627.779	96.8089	0.794393	190.344	1996.26	549.945	0.476611	0.212122	0.579551	0.356788	0.533644	0.433513
test_2022_05_06_18_33	121.107	0.825154	298.55	2299.77	640.092	98.0536	0.785135	199.14	1963.48	565.852	0.453891	0.22341	0.568662	0.360735	0.532842	0.432484
	106.887	0.791361	290.768	2463.89	722.184	85.3537	0.791504	201.26	2056.67	574.49	0.448902	0.265041	0.51976	0.381261	0.527189	0.433795
	105.841	0.793129	311.413	2513.39	754.746	82.9469	0.787134	181.961	1949.71	547.138	0.452824	0.263348	0.519096	0.383919	0.529213	0.435704
	118.507	0.79949	318.471	2393.77	722.564	78.5831	0.772946	188.891	1958.53	576.896	0.407772	0.260364	0.534065	0.379003	0.5344	0.439683
	113.777	0.799245	305.738	2412.45	714.154	75.5784	0.79242	178.986	1963.05	536.207	0.406309	0.254089	0.529566	0.377321	0.536935	0.432948
	115.49	0.80464	307.974	2462.67	713.322	79.5042	0.776956	191.568	1881.17	556.307	0.410252	0.252398	0.53657	0.375477	0.545563	0.436449
	112.097	0.826722	306.228	2288.92	633.63	70.0909	0.791124	183.46	1997.68	547.479	0.39542	0.220174	0.589913	0.358155	0.532506	0.434636
	106.468	0.793996	313.184	2459.7	736.293	76.2289	0.792391	184.147	1949.09	536.11	0.426058	0.260612	0.522049	0.381062	0.544297	0.432378
	92.5762	0.795882	311.815	2570.99	750.116	65.702	0.796526	178.437	1946.52	517.941	0.420506	0.257957	0.50755	0.380732	0.550561	0.428945
	116.815	0.791733	336.604	2754.2	820.969	82.0457	0.793841	168.871	1959.33	526.899	0.421009	0.262819	0.492519	0.38532	0.530608	0.436617
	105.915	0.790839	324.698	2537.77	768.931	56.9717	0.806555	156.349	1949.73	486.912	0.357031	0.261169	0.522297	0.381205	0.526719	0.431242
	97.1088	0.792628	350.787	2533.32	779.537	70.2971	0.817756	215.272	2210.87	565.245	0.432347	0.255017	0.533978	0.376623	0.549314	0.422578
	97.6165	0.797752	316.356	2489.68	724.471	64.358	0.797707	188.451	1980.38	534.833	0.401424	0.255639	0.537191	0.374199	0.539594	0.43072
	91.35	0.812125	309.643	2393.01	674.711	64.1469	0.797747	167.855	1867.33	497.248	0.408567	0.237289	0.556113	0.364922	0.547423	0.429356
	100.234	0.819348	335.721	2621.72	721.61	60.5556	0.799504	173.861	1977.17	519.765	0.389173	0.226214	0.555704	0.366144	0.538782	0.430888
	113.927	0.802563	323.008	2535.35	741.762	75.0899	0.799246	181.142	1965.14	524.718	0.401528	0.247686	0.528037	0.377926	0.5411	0.430754
	83.1593	0.754157	336.459	2678.11	886.903	53.4932	0.815752	157.315	1929.51	468.058	0.396558	0.302328	0.474664	0.398246	0.553638	0.425786
	88.3623	0.775269	294.534	2589.56	782.565	122.225	0.797829	173.849	1951.52	524.536	0.549057	0.282423	0.493878	0.390972	0.550068	0.435386
	82.5937	0.745666	402.055	2983.58	1014.35	67.971	0.798755	177.905	1910.43	509.136	0.440518	0.319371	0.462553	0.400645	0.549038	0.427192
	75.198	0.741964	356.778	2884.97	980.001	63.4356	0.800033	163.761	1945.39	501.675	0.452674	0.323429	0.459407	0.405101	0.5437	0.431723
	61.0508	0.828758	351.612	2678	712.782	35.2603	0.809349	148.33	2022.85	486.361	0.369467	0.212857	0.579588	0.354448	0.518272	0.434568
	101.667	0.784947	355.581	2723.38	851.802	80.7754	0.808253	185.733	1824.43	485.642	0.448531	0.267013	0.498214	0.388023	0.587402	0.419604
	94.2143	0.772545	284.676	2348.36	724.41	102.504	0.789705	184.716	2024.45	555.375	0.520075	0.290039	0.514852	0.386404	0.530035	0.43408
	86.6886	0.791338	272.435	2328.29	680.131	98.3246	0.789893	180.827	1908.47	534.788	0.531255	0.265112	0.516262	0.382308	0.546067	0.432201
	96.1053	0.776465	262.408	2423.59	723.824	86.2297	0.794945	190.499	1947.11	536.738	0.485413	0.282147	0.485665	0.3922	0.550119	0.425918
	77.1694	0.78478	299.567	2348.86	717.281	78.875	0.789183	188.478	1821.23	518.975	0.513033	0.273372	0.513068	0.385891	0.561032	0.424775
	58.219	0.768209	330.663	2514.39	792.549	57.9606	0.795962	203.196	1896.49	530.962	0.503969	0.292031	0.505005	0.385758	0.576278	0.422254
	78.2159	0.796981	304.248	2522.02	731.824	67.6444	0.80623	187.75	1827.29	492.308	0.469219	0.252407	0.528672	0.381455	0.587285	0.420268
	81.5556	0.785772	325.512	2506.26	767.335	68.994	0.804074	168.54	1824.67	480.511	0.46047	0.266582	0.520345	0.382487	0.561633	0.42583
	82.6154	0.810585	322.695	2458.6	707.784	70.2504	0.804203	192.355	1885.83	509.739	0.444259	0.236507	0.554896	0.36835	0.581691	0.420549
	93.5067	0.803979	347.686	2450.87	733.904	75.3036	0.805474	191.03	1921.51	513.96	0.444055	0.244322	0.560856	0.371432	0.574258	0.422524
	61.0575	0.815801	286.786	2500.53	668.695	61.9753	0.809888	178.15	1978.39	501.747	0.491062	0.229997	0.552455	0.36989	0.548092	0.42501
	71.18	0.835803	309.701	2334.15	612.518	48.4789	0.81126	160.897	2041.33	498.026	0.387504	0.203897	0.602699	0.349839	0.530498	0.432704
	79.0608	0.801669	323.723	2643.77	764.163	53.4753	0.822457	172.764	1869.54	462.145	0.407543	0.241331	0.527052	0.376565	0.585408	0.418406
	85.5764	0.806664	342.666	2830.73	797.699	50.0211	0.831679	152.006	1878.62	429.426	0.380741	0.232733	0.501467	0.377713	0.569744	0.416915
	66.4757	0.784238	361.552	2894.62	865.091	50.4486	0.818131	174.65	1864.48	459.935	0.402017	0.265105	0.521083	0.380534	0.598216	0.414176
	69.1596	0.796317	350.749	2878.42	834.628	40.9184	0.807669	189.467	1951.65	502.394	0.3709	0.253461	0.512657	0.379089	0.56542	0.418827
	61.5132	0.808975	372.168	2962.89	846.806	36.3092	0.823058	190.244	2053.14	493.526	0.376427	0.231616	0.518788	0.377902	0.58128	0.414109
	49.9623	0.82307	364.459	3287.78	837.428	29.3632	0.830465	177.734	1946.51	447.975	0.375339	0.213544	0.504124	0.368032	0.598038	0.406043
	61.2353	0.800307	366.628	2856.57	829.154	36.2794	0.790435	201.548	1842.21	522.236	0.378865	0.254148	0.511976	0.380636	0.594513	0.42096
	88.3512	0.825988	349.899	2553.45	719.007	47.8843	0.833026	147.283	1915.99	430.144	0.364095	0.209318	0.572786	0.365427	0.558103	0.421013
	68.88	0.80198	335.506	2592.59	750.549	53.0303	0.806698	177.176	1829.99	478.649	0.437617	0.245937	0.546684	0.372987	0.584521	0.41868
	77.1983	0.808097	349.547	2773.36	791.712	43.8059	0.792849	189.027	1669.52	470.564	0.356308	0.242987	0.532177	0.374696	0.601916	0.411635
	60.7176	0.829254	395.865	2998.87	814.944	34.3647	0.856276	178.691	2015.21	427.421	0.367465	0.200322	0.54559	0.36405	0.607372	0.399147
	56.7512	0.798012	322.57	2457.11	721.789	55.0742	0.812882	217.903	2032.19	540.742	0.491047	0.249183	0.549326	0.373185	0.589243	0.417924
	77.0377	0.769463	329.748	2719.23	840.447	55.6402	0.835582	138.039	1732.21	388.396	0.421992	0.27614	0.488069	0.3889	0.595129	0.412223
test_2022_05_06_18_35	98.1214	0.764411	329.308	2596.92	835.356	67.0253	0.768361	207.141	2457.09	706.409	0.424955	0.308472	0.503877	0.392969	0.459643	0.446311
test_2022_05_06_18_36	94.8075	0.827159	299.653	2223.49	621.219	65.3102	0.807061	174.73	2194	546.888	0.412895	0.214133	0.586477	0.35915	0.513944	0.431562
	87.0407	0.766892	342.784	2717.29	874.275	82.4441	0.803254	246.036	2248.56	624.405	0.49285	0.290864	0.484625	0.395736	0.54717	0.42506
	91.4497	0.761453	308.548	2688.01	857.768	68.0794	0.77681	215.372	2158.19	631.743	0.442763	0.308033	0.482733	0.397371	0.522325	0.439998
	72.7601	0.771286	290.522	2653.75	807.661	62.2297	0.803069	194.811	2340.3	594.34	0.465385	0.28633	0.479542	0.392451	0.517994	0.432363
	105.322	0.772496	325.732	2704.03	837.921	79.6079	0.801186	215.224	2101.62	574.88	0.435403	0.285203	0.483494	0.392242	0.545742	0.426118
	85.6156	0.805909	321.921	2538.47	729.845	69.5613	0.805711	232.938	2133.48	582.556	0.448676	0.241198	0.537708	0.374361	0.559949	0.419962
	80.7699	0.802478	303.358	2443.26	707.664	89.2832	0.789201	231.823	2035.5	589.409	0.505505	0.251157	0.555469	0.375174	0.575103	0.423708
	82.799	0.782221	325.923	2565.18	796.554	69.1985	0.793476	236.152	2190.22	617.195	0.452193	0.275267	0.512144	0.384252	0.544808	0.428434
	99.2286	0.776603	309.652	2738.31	832.057	121.124	0.764988	226.858	2185.31	668.454	0.511706	0.294461	0.477528	0.393442	0.507261	0.440114
	110.017	0.79612	315.384	2577.88	762.19	94.8843	0.781819	259.697	2306.83	685.889	0.467202	0.261836	0.514245	0.381588	0.524231	0.432223
	85.867	0.759567	312.946	2579.62	825.574	96.6233	0.785655	265.13	2348.27	695.84	0.537331	0.307443	0.480627	0.393444	0.528788	0.433164
	82.022	0.790909	289.057	2424.15	719.759	83.868	0.781492	249.182	2243.8	668.832	0.508917	0.268654	0.51912	0.377505	0.531	0.434011
	87.3915	0.78801	300.567	2494.18	732.865	97.8859	0.787406	225.291	2203.97	630.841	0.524659	0.269558	0.51583	0.381612	0.521021	0.435207
	92.1505	0.780216	295.933	2401.6	737.055	99.695	0.771437	240.339	2254.08	683.055	0.52371	0.286087	0.503712	0.386139	0.531236	0.437642
	115.356	0.806116	315.844	2377.35	700.654	82.8016	0.775526	226.615	2404.53	697.528	0.423968	0.251066	0.557646	0.3694	0.486163	0.440192
	109.893	0.78862	332.46	2605.45	796.64	104.081	0.767981	244.413	2101.16	655.301	0.488656	0.277029	0.506267	0.385223	0.538576	0.434472
	131.267	0.757631	325.809	2566.75	858.558	107.941	0.774474	227.357	2092.41	631.417	0.454964	0.314466	0.493343	0.398891	0.536533	0.432737
	87.126	0.812983	317.867	2431.1	689.092	67.5244	0.788225	175.343	2188.49	584.379	0.441858	0.238317	0.57245	0.366403	0.493418	0.440064
	73.3446	0.795233	316.245	2773.84	791.718	72.7975	0.781947	216.558	2271	644.753	0.491917	0.262534	0.500888	0.384484	0.512667	0.437148
	76.1671	0.798624	279.584	2502.83	704.265	65.2785	0.788032	229.297	2365.13	656.272	0.473646	0.256566	0.511481	0.380724	0.50966	0.43496
	72.7135	0.79116	320.543	2476.36	736.611	56.0642	0.79284	234.968	2285.71	637.919	0.440437	0.264102	0.529707	0.375605	0.526482	0.430872
	75.7971	0.805785	317.37	2341.22	682.27	78.9589	0.802494	195.285	2252.44	581.66	0.480929	0.242745	0.576457	0.365202	0.512767	0.431549
	88.3109	0.789046	300.895	2286.63	694.687	91.0224	0.788981	203.679	2139.66	594.319	0.48809	0.268444	0.548602	0.375247	0.527685	0.433086
	81.0491	0.799661	329.943	2580.21	758.727	68.578	0.803714	276.49	2499.9	691.741	0.45839	0.250003	0.529456	0.380366	0.534782	0.426716
	109.538	0.781313	343.441	2607.44	817.208	79.4556	0.791803	251.204	2223.51	644.541	0.420689	0.276951	0.515188	0.38609	0.556586	0.427846
	108.468	0.7873	311.557	2429.02	746.417	74.7585	0.787688	255.411	2172.81	636.657	0.414411	0.272331	0.519593	0.383418	0.560473	0.425707
	94.5063	0.778438	327.657	2689.51	830.038	67.7271	0.790479	233.353	2197.37	625.004	0.425447	0.281513	0.494933	0.389155	0.540303	0.429473
	106.907	0.82892	330.258	2501.95	685.711	77.0487	0.804739	239.655	2142.72	589.216	0.420235	0.213408	0.572306	0.360658	0.575035	0.420977
	86.5812	0.771122	313.163	2531.4	800.969	58.4137	0.783513	241.314	2311.69	667.406	0.412951	0.294499	0.514982	0.388882	0.520847	0.435467
	112.973	0.819385	308.039	2442.56	677.704	58.5156	0.802219	221.579	2198.22	591.028	0.344569	0.226552	0.561568	0.365976	0.539293	0.424389
	127.127	0.792482	327.392	2563.49	773.255	92.5801	0.785501	218.694	1949.49	572.063	0.420453	0.264802	0.518813	0.382007	0.567387	0.425702
	104.795	0.779726	323.537	2765.42	840.441	59.9701	0.807983	261.018	2454.38	661.21	0.368536	0.274183	0.482153	0.39269	0.542977	0.424406
	110.412	0.804176	358.478	2710.38	801.687	85.1849	0.818572	232.697	2205.78	574.384	0.440664	0.239866	0.526679	0.377458	0.574338	0.416764
	109.37	0.788447	320.233	2682.5	799.576	87.2433	0.780075	256.519	2083.85	639.277	0.461222	0.272478	0.504808	0.385922	0.566668	0.427584
	73.3548	0.813861	330.817	2601.93	724.192	70.9004	0.802411	212.742	2232.65	596.178	0.464579	0.233152	0.545292	0.367525	0.529676	0.430854
	67.6364	0.780971	320.5	2537.17	778.717	50.2335	0.802772	249.349	2273.32	621.943	0.428835	0.274224	0.523634	0.38416	0.551831	0.422499
	94.2676	0.812246	347.499	2586.15	743.169	55.9099	0.809459	253.869	2257.76	613.534	0.375942	0.233128	0.556813	0.368597	0.565588	0.41957
	75.46	0.786439	369.875	2895.38	876.672	54.916	0.783033	252.519	2266.26	661.652	0.421565	0.275436	0.510513	0.383855	0.544443	0.431294
	80.4895	0.792291	364.033	2719.19	830.331	52.4726	0.804335	264.857	2318.57	641.904	0.402423	0.260297	0.523417	0.383579	0.554024	0.42186
	81.8897	0.815473	342.938	2697.14	756.184	58.2552	0.812561	295.357	2444.04	661.4	0.417434	0.228302	0.550171	0.36844	0.577812	0.414545
	78.8481	0.807175	362.231	2757.19	800.517	49.689	0.800385	258.617	2149.59	608.352	0.392612	0.242051	0.541249	0.371784	0.580397	0.417134
	74.2458	0.785892	341.592	2865.92	834.283	43.9164	0.808406	230.023	2332.24	602.368	0.376525	0.266136	0.4989	0.382192	0.546934	0.421922
	70.9284	0.801676	371.404	2757.6	814.735	46.3723	0.793706	235.192	2231.73	604.266	0.401446	0.253127	0.534702	0.37458	0.556048	0.420746
	75.4169	0.830185	353.178	2906.24	751.82	39.9401	0.803109	226.2	2124.7	569.389	0.346974	0.213546	0.551705	0.361177	0.570191	0.419248
	72.3943	0.805558	376.122	2923.73	848.852	53.9809	0.808328	252.605	2255.48	613.466	0.423032	0.242202	0.524736	0.377204	0.567387	0.419701
	74.7657	0.820536	398.094	3139.39	849.789	47.7711	0.792448	227.651	1984.23	566.161	0.386357	0.228185	0.528449	0.370568	0.582179	0.418186
	61.7298	0.787482	373.331	2821.35	858.797	33.8992	0.801597	258.473	2261.93	610.415	0.355667	0.268146	0.519011	0.383392	0.56913	0.419652
	63.5561	0.83611	368.845	2685.96	723.659	30.8163	0.834519	225.552	2088.71	499.544	0.328979	0.197006	0.57986	0.357345	0.610733	0.400048
	56.1758	0.813004	384.573	2979.7	839	24.0282	0.808574	208.926	2205.45	554.371	0.30204	0.233203	0.533335	0.371736	0.556686	0.420859
	62.7865	0.777713	360.526	3015.96	905.893	41.6	0.814682	214.367	2305.64	567.1	0.393093	0.273518	0.492584	0.387601	0.552021	0.418596
	114.175	0.777055	315.832	2447.91	774.702	107.15	0.781723	278.009	2328.73	698.659	0.492149	0.287917	0.505232	0.387581	0.536424	0.429881
test_2022_05_06_18_38	86.9631	0.822085	337.183	2790.18	752.877	74.172	0.784444	212.205	1965.95	569.329	0.4628	0.227828	0.53942	0.369138	0.556147	0.427748
test_2022_05_06_18_40	87.3597	0.809573	336.736	2647.91	760.962	101.281	0.766782	226.957	1961.62	612.471	0.526586	0.24963	0.545122	0.370641	0.544266	0.434227
	104.055	0.842859	331.554	2606.03	670.451	76.8777	0.776844	226.167	1950.12	586.508	0.429232	0.205023	0.58373	0.351522	0.555599	0.427406
	111.913	0.813531	325.883	2618.11	737.272	97.354	0.778332	238.006	1995.69	610.179	0.468066	0.240472	0.55281	0.372545	0.555182	0.430205
	78.1605	0.793304	342.723	2849.63	834.56	64.9753	0.80583	202.512	2023.61	534.874	0.458832	0.257475	0.501033	0.379907	0.561838	0.421251
	82.676	0.838771	309.559	2533.94	642.624	53.554	0.799908	188.039	2092.72	545.549	0.399365	0.203577	0.586988	0.351505	0.510587	0.429909
	96.3362	0.747387	372.661	2861.27	969.495	76.6293	0.774225	220.52	2045.08	611.842	0.452331	0.327833	0.474547	0.398758	0.540945	0.433521
	83.9107	0.81204	336.902	2653.63	749.979	83.2893	0.809697	180.594	2107.74	532.966	0.504467	0.232987	0.536116	0.372225	0.523232	0.429958
	84.5352	0.832874	329.461	2715.28	704.426	97.4922	0.784231	216.145	2104.8	605.719	0.487671	0.214012	0.55946	0.359	0.529688	0.436142
	106.131	0.822297	338.189	2591.62	727.204	54.8224	0.813022	200.605	2142.91	550.15	0.348181	0.219336	0.55439	0.368087	0.547908	0.424245
	103.664	0.793404	335.058	2719.06	806.259	68.7647	0.79808	210.082	1910.14	536.595	0.404411	0.259979	0.514605	0.380715	0.562971	0.422187
	76.1569	0.786928	340.804	2618.77	794.601	57.7774	0.79765	213.733	2162.51	580.369	0.421107	0.270693	0.526828	0.377852	0.537842	0.42796
	73.1865	0.828538	369.46	2973.25	787.556	40.3393	0.825938	187.461	2119.88	507.347	0.356001	0.208013	0.551825	0.361707	0.534967	0.420049
	75.3459	0.805281	352.639	2698.75	777.589	41.4465	0.790894	195.299	1982.03	538.304	0.361236	0.24777	0.536952	0.373653	0.550806	0.425034
	100.11	0.798136	316.842	2504.79	740.18	102.492	0.806744	198.534	2104.11	550.367	0.513124	0.251636	0.538233	0.37882	0.541375	0.425582
	106.684	0.806558	318.228	2561.92	735.524	104.68	0.793842	227.146	2154.28	603.607	0.499518	0.244255	0.533175	0.376575	0.553276	0.428049
	103.673	0.820369	301.12	2406.44	662.47	97.5069	0.778702	199.31	1912.68	565.438	0.485369	0.231622	0.554015	0.367078	0.548126	0.432515
	105.846	0.801738	296.351	2384.5	690.577	95.8811	0.800454	233.537	2150.53	602.157	0.481648	0.247988	0.540464	0.374586	0.552511	0.426536
	111.304	0.781365	341.549	2557.4	801.662	109.033	0.781432	219.849	2061.22	601.65	0.500952	0.281201	0.514896	0.385566	0.535322	0.431156
	93.5407	0.803984	354.523	2637.79	775.442	79.3202	0.791083	210.605	2159.6	599.138	0.465133	0.247706	0.538481	0.374741	0.511578	0.432571
	112.148	0.820569	316.837	2442.56	680.072	103.593	0.78694	201.496	1928.4	557.511	0.479933	0.228521	0.556335	0.365233	0.539647	0.430746
	98.6773	0.802483	336.5	2566.23	755.06	88.4142	0.783095	222.566	2034.28	601.308	0.478413	0.253557	0.540676	0.374711	0.548274	0.43159
	105.618	0.8083	348.924	2690.69	769.4	80.8806	0.774854	189.143	1964.17	574.637	0.436361	0.248758	0.539646	0.373011	0.507503	0.439415
	98.3209	0.799153	352.071	2606.13	773.215	87.5571	0.789315	179.532	2089.93	568.711	0.47761	0.255652	0.543408	0.375124	0.506848	0.438278
	87.3538	0.813678	322.822	2735.94	747.193	73.8038	0.804823	193.355	1943.81	518.66	0.466587	0.231968	0.519177	0.372437	0.560194	0.423354
	82.026	0.793123	319.75	2544.43	748.398	71.1905	0.791186	192.816	1895.62	529.38	0.473923	0.263183	0.512121	0.378027	0.554693	0.425671
	91.6934	0.781844	320.077	2590.53	784.795	77.1095	0.799338	209.883	2079.69	566.821	0.46427	0.274157	0.516246	0.385355	0.536139	0.42669
	110.467	0.809439	334.49	2451.79	724.716	104.501	0.778513	237.246	2025.41	616.274	0.484508	0.246944	0.546728	0.370551	0.552866	0.430903
	91.4377	0.786386	346.086	2709.42	830.959	95.303	0.797495	180.962	1970.48	529.626	0.517332	0.26803	0.499072	0.386344	0.540796	0.430382
	94.5071	0.825603	336.302	2537.56	700.323	76.2475	0.79367	177.169	2077.14	549.632	0.434085	0.220799	0.559956	0.363078	0.51613	0.435888
	127.804	0.832526	351.892	2577.28	712.768	72.9476	0.782505	210.63	2019.4	586.583	0.362591	0.215868	0.574955	0.362844	0.54214	0.432654
	136.831	0.817968	345.055	2650.12	754.942	125.599	0.792738	211.382	2001.63	572.414	0.466067	0.23032	0.544124	0.37101	0.555945	0.429667
	108.584	0.818985	335.782	2573.66	718.345	80.557	0.785889	208.349	2007.33	571.558	0.424973	0.230711	0.562066	0.366124	0.542275	0.429782
	115.169	0.80452	350.444	2737.17	794.235	75.4055	0.787511	192.949	2041.32	571.775	0.407478	0.249292	0.521721	0.377215	0.525226	0.435791
	103.175	0.813056	328.37	2476.52	710.283	82.5168	0.784784	224.869	2152.21	621.198	0.427486	0.23958	0.551585	0.368562	0.539212	0.433046
	89.0396	0.826167	342.583	2681.8	723.892	92.7784	0.786905	211.939	2271.22	627.311	0.460176	0.2227	0.562419	0.364437	0.507172	0.435951
	98.5683	0.806171	343.061	2726.92	783.796	78.9098	0.808899	207.379	2031.21	537.809	0.446166	0.240636	0.528346	0.376894	0.566994	0.419079
	70.2219	0.793999	350.869	2796.4	816.913	64.7533	0.796084	225.564	2107.1	587.743	0.478426	0.259799	0.509987	0.380405	0.556073	0.425352
	95.0236	0.794816	346.98	2758.41	824.82	63.6486	0.808729	194.322	2062.1	540.136	0.406907	0.255263	0.513408	0.384263	0.547679	0.427641
	91.4118	0.805075	339.073	2684.93	772.899	71.6814	0.81249	206.965	1972.09	524.903	0.444389	0.241974	0.528797	0.378507	0.562341	0.418529
	87.5271	0.806696	360.232	2844.79	815.855	63.6245	0.804157	186.452	1954.43	514.083	0.424481	0.241816	0.525461	0.37544	0.545785	0.424508
	69.4718	0.817522	335.11	2536.59	714.335	57.4014	0.794944	237.746	2059.02	583.035	0.445656	0.230357	0.561406	0.366203	0.577014	0.420921
	62.1956	0.790266	334.359	2666.07	772.311	61.2082	0.792883	227.969	1937.41	555.569	0.486735	0.267003	0.522797	0.377699	0.581312	0.417874
	76.6809	0.810659	346.026	2821.87	791.811	66.6403	0.810346	214.338	2079.22	551.182	0.46401	0.234714	0.521209	0.37569	0.560768	0.42038
	117.769	0.792761	356.759	2649.89	808.746	55.4202	0.77461	210.535	2000.44	586.574	0.329754	0.270824	0.537128	0.378021	0.562491	0.434114
	79.0905	0.826613	336.496	2710.65	723.436	46.2397	0.822388	179.547	2203.98	519.939	0.375951	0.211693	0.553377	0.363606	0.528621	0.422862
	106.779	0.82636	364.469	2839.65	782.854	58.0455	0.803143	220.191	2015.39	549.126	0.354454	0.216627	0.552725	0.364404	0.558238	0.418397
	97.013	0.789213	345.619	2741.98	824.03	57.1169	0.813088	210.823	1960.39	515.858	0.370334	0.260803	0.518767	0.382613	0.584147	0.412422
	81.8728	0.834659	404.25	3020.76	805.699	48.9643	0.799139	212.851	2045.68	552.783	0.369056	0.20795	0.556917	0.36051	0.569458	0.422361
	66.6693	0.812193	354.683	2890.84	796.492	39.8661	0.815553	230.83	2297.45	561.23	0.382188	0.232272	0.525972	0.371881	0.573331	0.413507
	71.7878	0.814766	407.338	3201.74	893.037	38.1583	0.796419	234.8	2075.04	570.425	0.344952	0.23604	0.514638	0.37505	0.583153	0.418407
	68.8498	0.789949	380.694	2873.37	874.303	38.1717	0.820508	183.078	2145.49	507.92	0.358032	0.259158	0.517369	0.381885	0.537376	0.420341
	71.2684	0.810759	391.56	2904.6	834.788	51.9705	0.809554	228.092	2053.99	558.42	0.418449	0.234736	0.540151	0.372742	0.587439	0.418444
	77.6314	0.822778	399.138	3212.21	873.612	47.9237	0.779327	253.51	2139.42	629.664	0.38495	0.231322	0.519861	0.370876	0.570182	0.425082
	73.7902	0.798416	387.992	3075.69	900.267	40.8585	0.805552	186.851	2056.14	532.954	0.363316	0.251189	0.501392	0.37944	0.538905	0.428952
	59.3333	0.806143	402.41	2968.41	866.267	34.6486	0.811594	214.832	2237.74	562.343	0.36889	0.241295	0.543666	0.374102	0.540999	0.419271
	105.305	0.825403	355.682	2913.63	780.911	75.226	0.800877	197.48	1881.07	511.867	0.420036	0.218873	0.530474	0.368133	0.568911	0.419034
	75.1233	0.798866	416.668	3195.19	928.683	45.8502	0.802179	165.014	1978.32	507.294	0.374736	0.251291	0.499838	0.377975	0.541329	0.430248
	61.2799	0.833265	403.423	2986.52	795.522	33.8121	0.814181	219.164	2051.64	528.484	0.356376	0.206189	0.564673	0.360094	0.582424	0.411273
	76.9235	0.789089	347.463	2813.82	834.689	40.4063	0.802657	189.395	2035.54	528.733	0.352542	0.264171	0.516982	0.386183	0.535487	0.426421
	51.8016	0.801643	357.086	2898.78	809.452	49.5855	0.822928	194.241	2036.47	499.641	0.482227	0.242912	0.519334	0.373033	0.577467	0.412838
	79.0159	0.821274	340.928	2653.99	730.035	72.8571	0.816558	207.77	1996.23	510.356	0.463209	0.220389	0.548402	0.368206	0.594659	0.410141
	73.6744	0.804588	339.067	2808.81	789.086	45.8395	0.809455	169.255	2118.94	525.613	0.392727	0.241598	0.528259	0.374839	0.514698	0.431819
	86.1805	0.79539	330.666	2586.55	759.046	55.2401	0.80436	173.509	2079.83	530.573	0.402248	0.256332	0.535037	0.376563	0.513285	0.434123
test_2022_05_06_18_42	79.0327	0.771433	317.461	2491.94	784.532	106.635	0.764023	250.805	2007.45	646.631	0.575324	0.299823	0.509464	0.386633	0.538627	0.434453
test_2022_05_06_18_44	62.5015	0.807456	321.005	2581.27	721.122	82.0816	0.782283	214.92	1980.09	582.832	0.572916	0.247038	0.539146	0.372142	0.534526	0.430618
	55.1387	0.797552	340.02	2735.22	784.214	66.8102	0.773091	234.639	2113.47	636.087	0.548321	0.263902	0.519746	0.37827	0.527758	0.434272
	64.3794	0.819412	334.332	2742.17	732.238	83.4502	0.755682	252.825	1977.41	646.195	0.569784	0.242222	0.537378	0.366711	0.542005	0.433107
	65.2843	0.789284	316.714	2651.21	782.771	81.5508	0.776265	246.801	2141.4	651.208	0.564488	0.273152	0.511245	0.385428	0.53356	0.434349
	67.8203	0.796793	317.969	2452.41	723.841	77.0634	0.756529	249.255	2077.45	666.737	0.535943	0.271491	0.547646	0.376568	0.519371	0.436829
	84.2045	0.810485	309.883	2449.29	687.14	67.3591	0.774567	246.683	2206.24	667.746	0.451963	0.246245	0.553523	0.369091	0.523715	0.435687
	57.2958	0.751014	310.235	2622.9	861.949	68.5493	0.759051	242.282	1963.28	628.666	0.545191	0.331479	0.47175	0.399987	0.544279	0.431906
	69.9335	0.79191	297.542	2275.26	682.232	63.7979	0.77467	245.227	2333.35	689.567	0.480366	0.270108	0.55927	0.375313	0.499826	0.436866
	54.5343	0.775377	312.215	2509.44	770.946	73.7463	0.756969	219.964	1880.61	597.398	0.568586	0.298301	0.52249	0.384707	0.535274	0.43383
	66.0678	0.732245	323.803	2588.67	898.956	63.7203	0.788299	211.483	2182.29	606.952	0.485007	0.341531	0.476979	0.406793	0.507856	0.432655
	59.8205	0.754098	327.712	2504	831.455	80.5282	0.768621	245.447	2059.83	645.521	0.560386	0.321744	0.485392	0.394786	0.515318	0.434527
	57.1477	0.75719	303.663	2634.26	849.141	57.9275	0.814986	153.6	1971.61	472.561	0.502696	0.300357	0.487072	0.39726	0.510621	0.422895
	74.6324	0.819987	360.073	2620.23	740.31	77.6917	0.791957	235.642	2285.69	644.968	0.512744	0.228798	0.556153	0.367772	0.516978	0.432706
	56.229	0.833861	350.46	2925.46	752.363	50.2613	0.77263	230.363	2056.13	612.056	0.478782	0.217283	0.55768	0.360902	0.534553	0.43326
	62.2436	0.824463	324.959	2496.78	681.671	43.0353	0.799908	205.726	2081.47	561.203	0.422824	0.219391	0.581585	0.364584	0.524798	0.428453
	56.8821	0.751979	362.65	2622.38	877.741	45.2217	0.766283	285.677	2125.03	673.785	0.449523	0.326402	0.494026	0.392039	0.54951	0.426162
	58.4469	0.772678	368.702	2772.63	873.35	43.7765	0.78743	230.322	2199.04	611.199	0.422649	0.292921	0.493618	0.38718	0.51269	0.42658
	73.6973	0.857616	353.945	2891.94	699.766	44.4378	0.799064	173.789	2206.49	556.936	0.367792	0.179391	0.582299	0.349227	0.490957	0.438083
	64.5762	0.797226	362.62	2847.29	808.167	37.7571	0.803632	286.235	2497.96	677.431	0.377838	0.252984	0.5239	0.374505	0.546018	0.419206
	43.9236	0.738938	290.379	3044.33	962.335	72.0278	0.790724	273.343	2218.11	664.049	0.62987	0.330822	0.416302	0.410586	0.557137	0.428939
	72	0.796511	324.656	2589.01	758.411	84.4543	0.80177	210.322	2112.57	569.001	0.541197	0.254803	0.52921	0.37933	0.538815	0.425945
test_2022_05_06_18_53	104.539	0.767316	279.989	2592.64	796.162	92.4266	0.772303	286.672	2359.72	736.97	0.47874	0.30351	0.469936	0.396268	0.522912	0.435374
test_2022_05_06_18_54	91.8274	0.768875	317.801	2457.33	789.394	96.2611	0.750371	264.69	2287.42	749.865	0.520106	0.309887	0.498258	0.389299	0.507385	0.4454
	92.9369	0.793536	279.101	2298.45	676.473	100.493	0.784506	288	2334.58	710.714	0.525258	0.264954	0.526131	0.381423	0.544861	0.430702
	79.6638	0.825629	276.791	2340.77	617.571	74.8419	0.773258	248.194	2212.6	671.49	0.490841	0.227361	0.549201	0.364124	0.526404	0.436226
	104.896	0.799724	309.047	2504.85	730.043	94.7352	0.771671	243.058	2118.24	656.074	0.48201	0.260892	0.517004	0.381431	0.542434	0.437537
	115.198	0.787015	297.033	2288.03	698.919	100.711	0.794451	242.276	2150.5	619.184	0.475098	0.269271	0.535015	0.379663	0.55986	0.427578
	91.7616	0.789442	287.109	2425.71	719.158	72.5535	0.780326	239.865	2123.02	632.785	0.449154	0.272264	0.513988	0.383916	0.539671	0.43028
	88.2426	0.781782	291.275	2295.34	709.953	82.7054	0.774082	207.806	2051.66	606.814	0.490426	0.283307	0.520446	0.387059	0.528086	0.43841
	104.612	0.788316	302.087	2400.74	726.659	71.8532	0.773622	223.54	2268.47	670.988	0.416111	0.27528	0.523344	0.384255	0.503865	0.441054
	95.2409	0.812065	317.432	2559.94	726.85	82.562	0.764246	240.541	2148.4	668.305	0.47449	0.247158	0.520852	0.376565	0.531732	0.436773
	93.5364	0.805252	299.033	2616.64	727.047	73.9603	0.743646	215.644	2020.22	659.638	0.450733	0.263171	0.518604	0.377041	0.515478	0.44623
	100.647	0.793893	295.211	2564.21	744.39	72.789	0.770632	238.816	2230.33	677.164	0.422242	0.269018	0.512513	0.382358	0.521186	0.43949
	80.6559	0.793335	307.943	2469.77	735.396	65.6953	0.772825	214.747	2150.15	636.307	0.45626	0.269132	0.515002	0.377508	0.513527	0.441124
	103.971	0.79855	318.912	2527.64	741.136	67.0887	0.761004	235.536	2194.83	683.189	0.403209	0.26565	0.522155	0.378757	0.512209	0.441517
	83.3016	0.81148	287.824	2468.5	673.96	73.6957	0.777071	216.74	2027.57	601.808	0.470274	0.244334	0.532918	0.371042	0.540527	0.43412
	103.304	0.790291	323.512	2591.61	776.638	87.396	0.780445	240.897	2137.7	639.176	0.462844	0.269542	0.507902	0.383544	0.541666	0.432285
	78.8845	0.800281	311.709	2383.54	703.444	50.0802	0.799794	195.93	2075.45	554.155	0.393187	0.251259	0.550565	0.37055	0.538629	0.429463
	96.7197	0.821208	325.089	2453.38	685.639	68.1629	0.782411	224.666	2095.1	607.893	0.416102	0.229701	0.564299	0.364468	0.547407	0.430066
	104.31	0.774405	297.904	2507.84	781.52	83.0484	0.78465	254.127	2173.19	650.67	0.450838	0.288785	0.48619	0.392732	0.545293	0.43081
	92.7082	0.798398	298.569	2619.68	747.367	76.6295	0.772609	257.622	2272.63	698.48	0.443328	0.263275	0.506533	0.382034	0.522669	0.438116
	98.5432	0.800609	292.462	2551	722.053	67.7939	0.786102	228.181	2223.61	632.875	0.415987	0.256545	0.515297	0.379181	0.529168	0.430229
	106.328	0.798749	318.513	2539	746.199	58.8966	0.780988	219.674	2245.37	640.383	0.376581	0.260244	0.534065	0.376642	0.518	0.436196
	91.5904	0.828383	319.207	2712.35	709.486	82.4539	0.778785	214.919	1981.8	591.457	0.468227	0.220935	0.543541	0.36589	0.554292	0.432469
	99.7994	0.778627	333.535	2511.11	788.628	94.5627	0.776002	229.208	2003.68	609.002	0.489617	0.287127	0.519505	0.385378	0.557556	0.431066
	118.116	0.825318	339.115	2666.6	735.554	97.5216	0.777613	254.122	2303.93	694.267	0.455723	0.224582	0.539921	0.369029	0.527065	0.436697
	82.066	0.771181	290.714	2306.02	730.426	78.0119	0.795103	245.901	2152.73	616.631	0.487354	0.288833	0.519335	0.386718	0.56061	0.424283
	85.0189	0.826958	273.404	2187.68	588.683	89.5849	0.791723	235.436	2286.02	643.051	0.484082	0.219232	0.577297	0.357719	0.535817	0.430229
	113.456	0.809103	305.446	2503.24	702.388	118.444	0.78032	236.449	2198.28	649.804	0.504285	0.246207	0.533879	0.373835	0.520656	0.433603
	113.494	0.777066	338.92	2823.41	867.462	71.269	0.795394	232.034	2204.82	612.801	0.390339	0.281495	0.485176	0.391035	0.543857	0.427637
	79.1662	0.753132	334.266	2748.58	889.303	89.2205	0.792902	255.009	2230.84	641.338	0.528472	0.313357	0.473767	0.397488	0.556197	0.425753
	110.394	0.792546	316.218	2482.2	754.232	88.9231	0.792513	267.587	2253.51	661.287	0.440444	0.262465	0.516376	0.38421	0.55799	0.42672
	71.0323	0.766205	322.604	2667.03	848.447	57.7495	0.787872	214.819	2240.57	622.866	0.452754	0.298184	0.479353	0.396275	0.516529	0.435954
	119.169	0.822655	309.512	2626.9	699.229	95.2446	0.794881	219.21	2070.98	587.952	0.443859	0.22421	0.539875	0.367647	0.548976	0.427525
	88.6033	0.806573	310.554	2433.86	689.386	78.832	0.787961	213.764	2152.66	606.542	0.475308	0.246843	0.540479	0.372401	0.535507	0.433027
	84.7821	0.774849	299.412	2508.46	769.157	74.0224	0.778302	226.575	2137.88	629.98	0.465008	0.290815	0.497001	0.387392	0.531861	0.433365
	105.245	0.814159	304.428	2524.09	696.286	81.3286	0.792658	226.719	2177.63	608.968	0.434415	0.235528	0.536162	0.372276	0.535175	0.427387
[truncated: 80 more rows]

## Sheet: M2
	NADH.Intensity	NADH.a1	NADH.t1	NADH.t2	NADH.FLIM	FAD.Intensity	FAD.a1	FAD.t1	FAD.t2	FAD.FLIM	Redox.Ratio	FLIRR	NADH.G	NADH.S	FAD.G	FAD.S
[truncated: 1,706 more rows]
