# Supplementary material for: Comparison of phasor analysis and biexponential decay curve fitting of autofluorescence lifetime imaging data for machine learning prediction of cellular phenotypes
Source: Front Bioinform. 2023 Jun 29;3:1210157. doi: 10.3389/fbinf.2023.1210157 (PMC10342207; doi:10.3389/fbinf.2023.1210157)
Supplement: Supplementary file 3 [file Table1.XLSX]

## Sheet: Control
Unnamed: 0	NADH.Intensity	NADH.a1	NADH.t1	NADH.t2	NADH.FLIM	FAD.Intensity	FAD.a1	FAD.t1	FAD.t2	FAD.FLIM	Redox.Ratio	FLIRR	NADH.G	NADH.S	FAD.G	FAD.S
test_2021_07_11_13_28	342.078	0.698627	318.146	2189.59	878.209	47.9154	0.648471	481.539	3553.68	1429.99	0.122819	0.477946	0.508208	0.410465	0.358194	0.469517
test_2021_07_11_13_32	259.554	0.655732	315.003	2270.7	979.316	41.2971	0.638145	621.785	4789.39	1680.83	0.161433	0.561726	0.480474	0.42286	0.350839	0.475112
	287.418	0.718818	358.104	2347.5	909.972	45.8616	0.647779	547.647	3442.08	1445.33	0.145699	0.452856	0.519013	0.403655	0.386965	0.472259
	328.203	0.67635	343.533	2329.48	981.726	52.5882	0.65984	475.502	3401.12	1379.05	0.142337	0.505951	0.487973	0.416394	0.379883	0.466013
	360.131	0.732479	328.274	2205.54	824.615	57.564	0.649478	463.083	3106.14	1347.19	0.12336	0.428108	0.543601	0.39856	0.381447	0.471908
	326.429	0.687848	306.903	2142.51	877.708	72.6071	0.565997	564.58	3403.5	1692.93	0.202618	0.571379	0.507499	0.411987	0.329808	0.484618
	412.087	0.761537	321.433	2022.67	723.715	61.3043	0.69712	442.801	3291.07	1256.3	0.106723	0.346979	0.589441	0.380313	0.389178	0.460592
	378.9	0.721362	325.568	2195.66	843.62	35.6737	0.722724	478.607	3439.86	1195.28	0.0924902	0.394886	0.537827	0.401654	0.425071	0.453134
	251.749	0.72106	346.707	2410	913.934	48.0177	0.678622	531.488	4033.76	1433.19	0.178129	0.426776	0.508923	0.403888	0.373848	0.460894
	387.415	0.754074	315.992	2073.07	748.898	60.7476	0.705044	455.962	3023.31	1151.6	0.132948	0.359344	0.574069	0.38648	0.420906	0.460673
	307.623	0.665248	328.268	2322.33	989.371	59.2585	0.622514	476.697	3455.3	1468.1	0.149184	0.560333	0.47874	0.420221	0.352884	0.471891
	354.086	0.690978	315.616	2198.28	895.719	54.5265	0.648802	441.185	3304.59	1346.48	0.131435	0.487475	0.502881	0.412063	0.370377	0.473298
	258.201	0.709587	372.196	2462.27	971.488	26.2518	0.62234	525.242	3790.91	1537.98	0.0987459	0.486123	0.507103	0.408837	0.347904	0.474149
	394.952	0.728463	323.342	2168.96	825.064	61.7067	0.676669	472.743	2807.73	1175.61	0.134665	0.418745	0.541111	0.397234	0.439461	0.464744
	378.07	0.697454	349.402	2301.31	935.597	46.6973	0.659733	481.666	3270.49	1374.73	0.116453	0.471022	0.501305	0.410585	0.368622	0.464316
	283.968	0.709809	305.948	2227.18	851.592	47.0379	0.673336	461.003	3127.53	1291.94	0.194	0.444566	0.510395	0.406596	0.39308	0.465733
	172.138	0.708619	284.264	2220.22	833.565	55.0827	0.651734	378.068	2824.92	1192.26	0.281299	0.459873	0.497493	0.409704	0.371158	0.476682
	337.13	0.677055	334.629	2253.11	948.633	40.4022	0.725888	491.424	3346.42	1184.76	0.108569	0.46046	0.499136	0.41613	0.42434	0.451564
	377.039	0.735011	362.196	2426.54	903.807	44.1765	0.656152	402.668	3103.1	1276.05	0.108198	0.415581	0.516152	0.399854	0.378288	0.471325
	221.271	0.694426	339.654	2401.82	957.934	36.8623	0.644036	493.494	3475.08	1417.74	0.168967	0.491451	0.490011	0.412224	0.352757	0.468507
	359.54	0.717791	323.437	2196.63	853.36	40.1422	0.608232	523.223	3063.4	1461.66	0.101302	0.479716	0.532603	0.401547	0.373325	0.480211
	390.625	0.733188	325.079	2141.83	817.769	49.5259	0.730574	479.899	3187.06	1149.92	0.117996	0.380559	0.546754	0.390325	0.432569	0.451199
	281.502	0.727677	330.958	2136.28	816.266	41.1542	0.629394	409.934	3350.8	1398.79	0.129736	0.452617	0.544663	0.395414	0.327061	0.473931
	335.616	0.704724	336.8	2289.54	909.01	60.1205	0.677272	444.475	3012.66	1215.91	0.164706	0.450903	0.508747	0.407793	0.426433	0.467486
	364.402	0.685257	335.088	2200.99	919.035	39.0268	0.668715	451.739	3233.88	1301.6	0.0964833	0.488624	0.51296	0.413529	0.359559	0.465604
	430.826	0.752221	322.849	2140.53	772.14	49.3632	0.689954	454.681	3473.12	1234.73	0.102658	0.371214	0.559374	0.388159	0.41631	0.459614
	266.25	0.674854	317.672	2248.62	940.314	40.7101	0.614229	480.139	3238.21	1460.7	0.190344	0.54801	0.487737	0.417839	0.338544	0.48046
	361.143	0.717666	322.493	2257.91	865.234	63.3295	0.6071	413.097	2819.78	1327.79	0.150606	0.4771	0.514682	0.404929	0.374377	0.480147
	294.522	0.699474	322.046	2285.58	905.297	58.8696	0.635826	443.567	3514.36	1330.39	0.160599	0.489953	0.502665	0.410645	0.388539	0.472938
	301.997	0.742116	335.983	2194.25	811.835	41.2284	0.647899	515.644	3415.1	1445.79	0.1256	0.409504	0.553777	0.392155	0.336445	0.46825
	360.128	0.714099	337.701	2300.54	897.017	42.7207	0.648054	393.574	3702.19	1372.41	0.109035	0.449686	0.511088	0.405343	0.34928	0.476404
	265.759	0.712555	319.33	2153.09	839.754	37.0227	0.630982	516.721	2727.87	1268.08	0.128744	0.473028	0.528101	0.402923	0.336073	0.483913
	382.605	0.714974	364.873	2379.61	937.099	49.0294	0.622807	475.435	3450.71	1384.33	0.121799	0.48193	0.506262	0.405737	0.391083	0.473036
	400.762	0.734988	292.887	2107.9	773.998	53.9032	0.67277	439.038	2954.68	1224.28	0.12287	0.403222	0.541897	0.395373	0.399262	0.464001
	331.71	0.721904	327.491	2284.51	868.131	36.9034	0.693718	461.837	3204.98	1252.71	0.104335	0.407816	0.523943	0.401088	0.398063	0.462816
	367.294	0.71189	371.769	2370.1	949.562	43.2302	0.677514	428.652	2920.53	1183.83	0.117993	0.435219	0.521515	0.401765	0.419101	0.468087
	352.686	0.740883	311.615	2126.97	782.532	92.7297	0.639063	340.285	2673.98	1152.26	0.190346	0.413966	0.547507	0.393289	0.396317	0.47863
	280.461	0.706801	326.85	2291.18	898.648	37.3313	0.646127	458.83	3352.33	1354.25	0.126293	0.469339	0.50875	0.407606	0.374394	0.473769
	416.44	0.681952	334.04	2397.39	982.36	55.9845	0.600756	445.485	2901.25	1383.48	0.119927	0.545629	0.477199	0.417114	0.366922	0.478938
	338.818	0.705803	348.749	2428.65	954.899	46.6174	0.633281	370.721	2856.47	1229.73	0.128048	0.478887	0.489607	0.409187	0.362876	0.476374
	249.221	0.692669	323.182	2277.65	914.949	42.4456	0.632142	387.713	2824.04	1250.91	0.150543	0.498082	0.503181	0.410899	0.382711	0.480075
	327.765	0.758247	357.588	2238.91	815.031	40.6417	0.685063	451.173	3139.04	1242.12	0.119308	0.362642	0.563918	0.384579	0.40009	0.463068
	293.352	0.710612	341.245	2434.64	942.442	61.2228	0.625594	425.507	2865.28	1300.52	0.171991	0.478137	0.497336	0.408114	0.386401	0.475435
	398.758	0.729311	323.402	2254.85	840.6	67.375	0.633092	388.656	2923.5	1272.9	0.144148	0.434943	0.524828	0.399679	0.380244	0.476159
	363.292	0.726001	304.624	2125.63	798.023	54.3111	0.631757	425.054	3116.13	1346.2	0.132475	0.445383	0.536979	0.398295	0.353112	0.475217
	348.915	0.713417	359.519	2382.05	931.064	47.582	0.643858	454.969	3080.47	1304.65	0.138303	0.458885	0.515313	0.405555	0.383735	0.475047
	277.346	0.731577	345.04	2344.03	876.875	33.8299	0.656368	361.787	2880.87	1185.24	0.114208	0.424192	0.526842	0.399633	0.361368	0.475927
	310.664	0.668675	356.515	2417.71	1032.3	45.3435	0.675089	529.057	3543.81	1366.87	0.135291	0.513562	0.473553	0.419828	0.385066	0.460242
	298.502	0.687676	358.294	2451.5	1000.28	52.8116	0.676445	426.8	2930.91	1201.04	0.154393	0.470001	0.482277	0.414142	0.415081	0.468311
	351.071	0.753265	336.812	2201.11	799.631	52.3141	0.678901	464.964	2917.82	1173.74	0.130917	0.375715	0.561878	0.387512	0.41997	0.463293
	259.029	0.708929	371.397	2409.06	954.575	58.0676	0.682602	448.361	2991.15	1179.03	0.184195	0.439152	0.518385	0.406182	0.434444	0.463874
	368.07	0.728196	316.923	2160.25	819.068	44.3925	0.680283	438.154	3079.35	1226.46	0.111624	0.408153	0.545234	0.398029	0.390845	0.465622
	323.835	0.715608	328.179	2281.77	880.489	58.446	0.680724	355.756	2713.53	1085	0.158438	0.428307	0.513356	0.403721	0.408168	0.464621
	267.912	0.72406	323.351	2245.61	847.325	42.5038	0.682892	418.574	3246.58	1203.66	0.142366	0.41436	0.521177	0.402449	0.367542	0.46863
	347.823	0.715045	329.494	2291.01	881.194	89.232	0.745856	271.029	2667.8	886.611	0.217656	0.387578	0.523056	0.406822	0.423907	0.446949
	352.262	0.716012	330.428	2211.3	859.484	56.8168	0.638372	427.732	2925.66	1272.74	0.143955	0.456919	0.524181	0.403014	0.374153	0.471432
	368.938	0.73001	324.01	2328.55	865.338	76.2605	0.722751	417.446	2724.73	1025.06	0.168629	0.385781	0.51936	0.400933	0.453771	0.453766
	285.924	0.781993	255.828	2022.45	646.898	94.4177	0.733749	313.989	2472.18	889.174	0.24592	0.304507	0.575753	0.374109	0.472894	0.446008
	221.667	0.703358	313.582	2315.78	903.504	59.2952	0.666153	364.114	3046.81	1209.73	0.202094	0.4562	0.495483	0.412693	0.354606	0.470688
	378.85	0.7663	337.157	2251.4	786.302	41.2409	0.716916	432.973	2930.78	1098.73	0.101105	0.337527	0.565689	0.383598	0.440057	0.448139
	327.418	0.715267	326.597	2288.06	879.251	49.8361	0.705616	437.447	2882.63	1095.9	0.133498	0.411965	0.508873	0.406054	0.442987	0.46081
	358.169	0.722279	341.199	2316.83	880.285	75.4044	0.739621	344.236	2543.95	877.482	0.187415	0.383342	0.515699	0.403585	0.487088	0.449203
	267.569	0.722466	331.418	2203.62	845.6	50.8944	0.651019	453.291	3226.7	1288.66	0.15644	0.441728	0.524048	0.399739	0.362872	0.473556
	319.078	0.690864	330.386	2328	944.775	48.1783	0.689521	436.286	2715.28	1088.45	0.139537	0.46347	0.493964	0.4146	0.441184	0.460384
	359.789	0.737057	334.734	2331.55	851.76	51.7536	0.666629	432.912	3057.23	1225.11	0.128889	0.406294	0.523996	0.397809	0.38377	0.470136
	271.239	0.67503	362.957	2469.38	1035.61	38.116	0.637233	438.16	2997.47	1292.96	0.132841	0.527952	0.474023	0.418619	0.340714	0.481771
	264.753	0.689764	318.698	2210.23	906.129	56.6791	0.665437	376.906	2813.21	1149.73	0.200599	0.479958	0.505028	0.409195	0.404008	0.469353
	342.859	0.729239	331.055	2312.91	861.97	53.1792	0.662198	400.233	3062.47	1207.91	0.137351	0.419947	0.51945	0.400074	0.383496	0.468954
	303.116	0.722376	341.934	2321.16	888.616	66.6744	0.67852	358.548	2611.14	1053.11	0.194211	0.424008	0.522146	0.403196	0.431702	0.467417
	295.212	0.748894	335.856	2210.14	805.51	51.2011	0.715705	387.809	2670.51	983.472	0.154298	0.368865	0.55822	0.389538	0.484081	0.451096
	324.181	0.70902	363.681	2477.77	973.463	47.0258	0.677753	429.598	3309.56	1271.39	0.134521	0.436506	0.48143	0.409201	0.390978	0.465805
	304.105	0.699425	314.398	2281.17	895.335	43.1744	0.655473	368.802	3067.7	1268.22	0.128666	0.469587	0.497193	0.411168	0.351981	0.475341
	351.754	0.701831	336.749	2324.68	924.261	62.3792	0.672506	419.113	2975.83	1210.17	0.160911	0.452128	0.495796	0.40952	0.403847	0.465445
	298.189	0.732885	333.68	2305.06	857.554	34.3811	0.741822	445.116	3265.92	1074.98	0.110467	0.372012	0.532086	0.398441	0.418544	0.443346
	305.905	0.738383	327.394	2235.06	823.01	38.2976	0.65717	388.333	2762.09	1151.19	0.121603	0.413331	0.537387	0.396023	0.354692	0.480118
	206.754	0.674424	353.689	2520.68	1050.34	46.5908	0.699264	372.525	2824.72	1077.02	0.186599	0.475714	0.4718	0.418079	0.410698	0.46493
test_2021_07_11_13_36	354.274	0.749931	322.693	2182.38	787.456	31.5943	0.719041	442.706	3123.38	1112.6	0.0801882	0.357467	0.547496	0.39099	0.452585	0.44114
	285.107	0.773707	333.982	2178.44	748.656	46.1378	0.751541	441.635	3125.77	1046.83	0.134217	0.308282	0.579001	0.379169	0.466434	0.434795
	294.976	0.709488	342.368	2301	902.307	35.1128	0.705496	461.591	3383.12	1222.06	0.108349	0.4249	0.515294	0.405223	0.416188	0.445056
	356.27	0.720278	302.515	2105.24	805.234	43.0842	0.691204	429.918	3063.84	1166	0.106569	0.417001	0.534009	0.401264	0.42017	0.448233
	444.261	0.730211	313.645	2164.21	814.92	43.5273	0.675762	449.732	2927.88	1182.24	0.0871861	0.411183	0.535884	0.396664	0.424704	0.453303
	327.6	0.735618	332.277	2212.23	827.252	33.6762	0.666188	516.961	3409.11	1374.6	0.0903024	0.415033	0.539795	0.395478	0.376338	0.458941
	323.146	0.690464	316.258	2307.01	930.2	42.1973	0.667902	417.818	3128.77	1250.99	0.117732	0.482003	0.487569	0.413502	0.382868	0.455432
	332.881	0.71888	318.03	2205.77	843.719	30.0548	0.684842	406.864	3188.96	1212.23	0.0806796	0.425992	0.526846	0.402508	0.384638	0.454023
	350.123	0.667236	284.276	2156.42	901.61	41.7826	0.657868	458.883	3162.82	1303.35	0.108693	0.526373	0.490238	0.421088	0.388387	0.453373
	349.416	0.748644	304.469	2068.52	744.077	36.2093	0.669763	403.097	3135.48	1205.7	0.0934828	0.387285	0.550711	0.388878	0.402713	0.453913
	334.156	0.732719	320.063	2125.83	800.169	35.8671	0.707815	388.403	2812.04	1050.16	0.0975119	0.388173	0.548422	0.393908	0.447429	0.448022
	348.22	0.729377	309.751	2170.45	811.814	44.5809	0.660296	431.343	3135.62	1282.5	0.111728	0.421025	0.526008	0.399975	0.382138	0.457128
	389.923	0.704006	315.162	2165.22	860.427	48.527	0.683163	481.927	3072.67	1206.37	0.108942	0.447001	0.515801	0.407271	0.432262	0.453202
	348.897	0.699749	345.817	2304.93	929.452	37.8424	0.700226	383.79	3008.36	1103.48	0.0963547	0.444418	0.508432	0.411484	0.424372	0.447191
	333.427	0.677865	311.251	2251.74	928.676	32.1517	0.68699	521.879	3991.94	1395.51	0.0871226	0.480473	0.495473	0.417405	0.384464	0.452534
	411.444	0.715134	332.43	2115.73	837.336	42.4795	0.737077	396.238	2930.94	1007.85	0.0934578	0.396884	0.554687	0.401091	0.463854	0.437374
	392.163	0.717045	326.947	2118.11	829.99	39.549	0.699405	433.967	3306.85	1180.47	0.0930186	0.411099	0.542124	0.401237	0.437774	0.451149
	354.264	0.663068	358.741	2357.31	1027.28	46.0952	0.63746	474.446	3549.85	1411.11	0.110389	0.541664	0.48111	0.421263	0.38278	0.467151
	311.824	0.69018	303.243	2185.54	883.625	54.5992	0.633773	401.814	2944.51	1261.9	0.157438	0.509499	0.503786	0.411812	0.38101	0.466325
	321.203	0.739001	316.797	2131.59	789.347	43.3055	0.663743	379.097	2671.62	1093.24	0.124401	0.406642	0.543038	0.391861	0.388659	0.463855
	286.582	0.666538	352.491	2388.08	1022.21	54.5862	0.620448	407.745	2694.4	1222.98	0.151416	0.560434	0.473115	0.419154	0.41382	0.468137
	391.817	0.707224	320.598	2228.64	876.09	57.4911	0.672404	402.303	2827.37	1164.57	0.124306	0.442947	0.502919	0.407006	0.414405	0.457317
	389.618	0.703659	318.206	2185.96	869.575	57.903	0.653061	391.007	2963.1	1228.34	0.129808	0.463222	0.50823	0.407131	0.391968	0.462317
	413.711	0.697727	299.102	2061.95	832.12	55.1157	0.71503	422.499	2714.94	1038.84	0.116893	0.429555	0.525536	0.406614	0.469476	0.444918
	314.659	0.663168	381.75	2421.36	1064.86	35.8016	0.685378	466.343	3724.13	1320.52	0.102615	0.501004	0.482197	0.423248	0.391875	0.451258
	328.801	0.702577	298.472	2302.11	892.338	61.4861	0.644285	421.992	3024.34	1324	0.133485	0.4733	0.491403	0.412997	0.378737	0.464857
	322.914	0.692275	300.879	2176.97	870.532	72.9571	0.621811	342.54	2626.08	1173.33	0.191321	0.508899	0.491004	0.412858	0.399709	0.467879
	472.624	0.696945	286.854	2010.24	805.825	62.6575	0.708193	389.961	2731.96	1037.4	0.115231	0.435077	0.525461	0.405977	0.461417	0.445986
	375.217	0.70465	308.557	2122.74	842.7	55.7729	0.637563	393.083	2897.79	1248.78	0.127622	0.474906	0.515942	0.406223	0.391112	0.465974
	300.154	0.675237	333.352	2331.88	968.272	41.9624	0.688319	371.219	3046.58	1127.76	0.12419	0.482788	0.485244	0.416146	0.406315	0.451612
	360.21	0.727085	309.6	2125.55	804.838	60.345	0.649336	346.35	2744.04	1146.17	0.142397	0.429264	0.537166	0.397152	0.403851	0.463736
	391.641	0.690474	296.182	2165.63	871.61	66.2757	0.656052	337.4	2592.09	1081.66	0.150345	0.48116	0.502237	0.413183	0.413899	0.464329
	300.674	0.691004	309.674	2204.97	888.648	52.0304	0.633377	379.16	2996.28	1285.83	0.145389	0.498942	0.499757	0.411402	0.363336	0.467516
	373.776	0.742035	314.419	2308.91	828.298	42.8601	0.657922	406.088	2795.1	1167.65	0.103006	0.404783	0.51785	0.398082	0.410919	0.458658
	309.448	0.712038	309.516	2236.56	860.942	49.8779	0.624449	447.669	3012.71	1368.94	0.138984	0.472858	0.506777	0.406653	0.372987	0.472534
	441.847	0.690671	328.971	2293.21	929.114	73.5	0.640259	359.509	2434.11	1080.41	0.142313	0.497058	0.490536	0.413503	0.436996	0.461554
	374.084	0.724761	292.322	2099.33	783.004	104.06	0.648575	366.737	2614.34	1115.54	0.196666	0.433458	0.532367	0.400448	0.429403	0.461965
	378.253	0.661052	324.009	2212.19	962.61	48.7874	0.635419	343.708	2693.18	1127.85	0.111417	0.546272	0.484796	0.42115	0.390018	0.469265
	374.676	0.746858	319.89	2179.88	786.59	49.5455	0.657109	531.795	3100.63	1341.62	0.111528	0.399675	0.547903	0.390822	0.398259	0.46326
	412.299	0.71421	314.576	2226.49	857.873	47.8354	0.663276	366.8	2767.22	1133.73	0.100856	0.438223	0.516519	0.405379	0.40769	0.458842
	337.527	0.688239	301.118	2207.05	890.832	51.6485	0.672737	333.673	2646.28	1066.74	0.138296	0.475277	0.500666	0.415269	0.411442	0.462354
	332.006	0.721425	297.244	2135.22	806.223	40.05	0.679493	393.485	3120.19	1193.8	0.107991	0.421711	0.537538	0.401611	0.393955	0.454898
	434.273	0.741689	318.901	2103.01	775.121	58.2955	0.686496	359.769	2575.51	1033.98	0.117681	0.384427	0.554695	0.393275	0.451852	0.452527
	411.14	0.700013	319.349	2213.78	887.85	58.0896	0.655532	377.828	2747.3	1169.26	0.117733	0.465617	0.513847	0.408278	0.404393	0.463298
	355.109	0.664481	300.053	2321.83	983.776	64.0402	0.628094	418.049	2939.91	1302.01	0.150473	0.552075	0.461608	0.420488	0.380624	0.463962
	349.221	0.748532	324.114	2160.98	779.205	40.3081	0.654138	496.537	3176.51	1330.2	0.10262	0.395853	0.549966	0.39158	0.394881	0.461125
	431.036	0.698336	320.637	2199.72	886.408	59.5437	0.676297	350.061	2638.08	1058.55	0.120861	0.455413	0.513133	0.409223	0.4388	0.457378
	350.724	0.687499	346.039	2491	1009.58	42.5833	0.635409	382.398	3162.42	1280.47	0.109761	0.504399	0.466448	0.417818	0.399941	0.465303
	319.665	0.708867	286.856	2136.25	829.569	63.2812	0.661166	416.677	2713.43	1150.36	0.224492	0.45594	0.51166	0.405079	0.407515	0.459955
	417.76	0.702342	330.599	2255.18	899.569	66.7103	0.65329	410.561	2949.33	1258.66	0.13472	0.462749	0.500866	0.410135	0.403296	0.461098
	493.806	0.747795	320.771	2113.56	772.732	58.7915	0.60078	484.952	3033.91	1420.65	0.103854	0.436093	0.546322	0.390705	0.362276	0.468593
	312.759	0.727856	315.275	2305.57	854.138	35.9643	0.639729	412.701	2910.04	1257.54	0.132742	0.437556	0.508153	0.403985	0.37021	0.469675
	476.035	0.766288	311.34	2039.61	715.494	46.5141	0.657915	498.806	3051.84	1329.39	0.08787	0.363652	0.578641	0.380354	0.380184	0.464545
	450.148	0.702203	318.912	2163.04	864.477	67.2953	0.689032	349.15	2692.92	1053.25	0.129854	0.437232	0.509985	0.407458	0.439074	0.456119
	354.95	0.736473	308.563	2170.34	795.648	50.8997	0.684097	416.509	2757.73	1101.85	0.119674	0.397911	0.53005	0.396649	0.433892	0.453246
	283.11	0.70674	330.783	2320.88	907.468	40.3333	0.672889	385.115	3371.66	1193.29	0.125257	0.447124	0.510862	0.409181	0.398019	0.45897
	406.718	0.708124	311.614	2183.25	852.93	95.326	0.678499	363.795	2565.29	1041.74	0.182242	0.435851	0.50845	0.406702	0.449025	0.453945
	398.304	0.755916	308.4	2163.31	757.441	51.7611	0.657292	374.988	2873.49	1192.56	0.114836	0.378777	0.542806	0.391365	0.384855	0.464901
	409.218	0.745495	313.086	2096.48	761.648	72.7433	0.648633	380.053	2710.94	1150.34	0.12887	0.402735	0.554267	0.391272	0.394263	0.463396
	463.579	0.768607	305.281	2047.39	708.187	49.2956	0.645905	386.034	3408.99	1251.26	0.0951078	0.370032	0.572254	0.381051	0.378493	0.461709
	404.35	0.692259	309.81	2284.02	913.708	54.3008	0.609611	407.078	2955.93	1347.5	0.117556	0.521969	0.497558	0.412539	0.371171	0.468294
	399.252	0.730022	315.642	2251.35	838.622	48.8531	0.650951	351.759	2682.03	1119.22	0.108932	0.429273	0.521772	0.401425	0.398288	0.463532
	385.786	0.724669	314.192	2234.7	840.149	55	0.672804	385.32	3006.32	1184.39	0.121116	0.417623	0.519369	0.402113	0.394254	0.45796
	398.975	0.73943	307.307	2125.1	777.695	63.8517	0.633662	382.114	2664.56	1177.49	0.134709	0.424202	0.549293	0.3955	0.400581	0.465303
	347.136	0.70837	324.994	2325.46	902.238	41.0409	0.679789	405.272	2921.62	1158.85	0.106011	0.438885	0.500836	0.408857	0.402484	0.458425
	354.428	0.736721	333.1	2161.57	812.025	49.8616	0.675536	440.455	3202.23	1275.96	0.121354	0.398676	0.54736	0.39614	0.391304	0.455053
	407.517	0.736876	327.771	2106.42	793.524	66.4957	0.675938	398.676	2735.94	1103.52	0.138458	0.399616	0.546559	0.393403	0.438072	0.453532
	306.37	0.761726	313.743	2205.52	758.657	35.1681	0.720009	317.584	2811.47	972.684	0.101496	0.337333	0.560014	0.385969	0.413131	0.446908
	315.664	0.716204	335.358	2307.94	888.017	43.9526	0.677409	390.472	2745.72	1104.25	0.123931	0.429757	0.510538	0.40639	0.428882	0.455468
	324.756	0.743072	302.929	2127.14	768.973	47.3333	0.710231	350.728	2902.28	1039.05	0.125874	0.368419	0.545068	0.393799	0.417148	0.448065
	320.572	0.732766	328.613	2206.83	823.21	39.64	0.690195	364.898	2872.07	1087.67	0.106964	0.396894	0.537182	0.396704	0.424908	0.454337
	343.81	0.729204	324.19	2174.3	820.007	47.9286	0.702588	405.975	2860.91	1079.76	0.122003	0.394241	0.534982	0.398417	0.42981	0.451783
	284.351	0.72249	346.283	2370.74	897.124	29.4167	0.676567	361.868	2606.31	1023.61	0.0943035	0.424654	0.50479	0.403911	0.426301	0.454127
	345.843	0.727981	303.624	2037.58	769.79	52.5303	0.680525	354.423	2658.9	1049.51	0.128308	0.409824	0.55244	0.392363	0.429148	0.456279
test_2021_07_11_13_40	356.587	0.742658	349.956	2327.5	853.381	40.5397	0.687753	454.71	3343.18	1282.27	0.102259	0.382545	0.544663	0.396235	0.438693	0.425163
test_2021_07_11_13_42	391.402	0.754563	331.883	2164.65	787.281	51.8182	0.76787	490.237	3116.88	1062.93	0.119557	0.33351	0.576917	0.383259	0.522744	0.395102
	340.271	0.727137	337.236	2217.13	847.194	39.6514	0.705149	469.743	3211.68	1210.45	0.105611	0.396631	0.544685	0.398041	0.454069	0.420083
	349.848	0.77534	346.065	2253.05	770.472	54.6747	0.693544	512.042	3172.65	1257.85	0.150308	0.335384	0.583735	0.380831	0.466594	0.423516
	263.942	0.742042	347.608	2337.02	851.075	33.6446	0.632076	462.224	3199.84	1367.69	0.1142	0.420764	0.540109	0.394978	0.423707	0.441542
	303.74	0.718798	356.521	2503.34	951.6	37.4528	0.627183	543.998	3185.96	1464.69	0.108946	0.46022	0.501242	0.406286	0.411653	0.442367
	340.629	0.753883	366.335	2407.98	865.558	36.8946	0.660668	440.332	2970.34	1233.86	0.0958811	0.387901	0.543997	0.391849	0.456829	0.429505
	278.257	0.683069	365.925	2588.23	1062.18	33.6754	0.63494	439.472	3173.02	1351.67	0.10733	0.520299	0.468203	0.415617	0.400813	0.44198
	368.07	0.700107	333.654	2362.81	943.811	46.7668	0.679366	523.816	3272.79	1318.57	0.107603	0.459719	0.506115	0.408536	0.443004	0.42489
	319.737	0.709652	363.342	2650.29	1018.81	46.8136	0.62313	351.881	2733.48	1225.14	0.131412	0.480586	0.481445	0.409659	0.438323	0.442167
	425.924	0.690813	301.37	2304.03	915.151	125.132	0.641094	512.337	2928.23	1357.46	0.219328	0.487081	0.487522	0.416399	0.450972	0.436564
	363.854	0.708353	325.974	2307.11	898.77	42.061	0.707958	486.28	3227.62	1178.48	0.101992	0.427323	0.520576	0.408567	0.461055	0.417923
	368.163	0.704326	342.004	2363.33	935.64	51.9106	0.726041	472.84	3211.95	1180.98	0.119614	0.415117	0.504008	0.410276	0.472876	0.411695
	437.761	0.750886	329.407	2210.13	796.732	54.1935	0.747854	485.782	3298.23	1168.18	0.105569	0.336261	0.556892	0.390839	0.491666	0.408156
	314.819	0.73372	339.897	2389.46	877.868	38.2034	0.667887	476.576	3186.62	1338.12	0.106762	0.404088	0.521838	0.398604	0.43008	0.433328
	386.168	0.738491	329.216	2326.05	849.674	35.8485	0.692994	460.948	3271.31	1247	0.085921	0.387749	0.530422	0.399416	0.434215	0.423381
	366.098	0.72163	359.349	2479.91	942.057	48.9595	0.723359	497.264	3147.43	1183.85	0.116482	0.392108	0.506813	0.405641	0.485039	0.415088
	392.669	0.728651	330.979	2281.79	858.474	40.7323	0.723158	429.228	3448.12	1193.98	0.092691	0.379439	0.530167	0.401665	0.441314	0.41334
	293.169	0.70104	328.829	2400.88	938.21	36.4868	0.672808	438.211	3068.01	1248.16	0.170127	0.454623	0.501301	0.411983	0.419788	0.431762
	370.724	0.730379	342.564	2332.03	877.196	47.9929	0.658126	378.751	2813.7	1177.33	0.119505	0.416164	0.531398	0.40112	0.427797	0.436461
	243.533	0.723494	301.282	2367.71	862.218	37.7028	0.653096	411.789	2780.8	1172.85	0.23353	0.44061	0.506242	0.40668	0.42133	0.437789
	410.31	0.757566	329.15	2328.55	812.67	43.0264	0.720339	433.57	2907.96	1080.02	0.0928575	0.346611	0.549879	0.391306	0.497618	0.413588
	430.562	0.727865	335.664	2346.85	882.718	42.6952	0.676459	514.924	3601.6	1337.38	0.0902123	0.418801	0.520619	0.401114	0.444539	0.427883
	472.386	0.700792	340.372	2421.89	960.975	48.2982	0.617596	459.291	2888.92	1336.33	0.0927155	0.50172	0.492633	0.412916	0.42853	0.441797
	338.328	0.769336	357.926	2359.98	819.443	33.648	0.64704	563.314	3021.43	1349.54	0.0890083	0.371051	0.564946	0.38498	0.424436	0.439694
	327.149	0.697198	313.891	2277.92	903.464	68.623	0.635768	456.089	2988.9	1292.39	0.194929	0.493998	0.513611	0.411001	0.450757	0.437925
	342.869	0.728279	325.819	2161.96	820.52	72.973	0.636414	455.28	3044.55	1321.35	0.18346	0.439235	0.539408	0.399127	0.426873	0.438452
	402.509	0.723496	322.083	2274.53	861.28	47.0252	0.693841	401.734	3020.84	1174.57	0.10255	0.403538	0.531623	0.400991	0.444703	0.428007
	353.329	0.747579	350.435	2296.65	837.904	38.5689	0.688539	505.323	3737.96	1331.68	0.0979347	0.380426	0.554691	0.392334	0.426132	0.420081
	416.276	0.745844	345.148	2296.1	836.196	57.6742	0.685494	419.631	3093.06	1212.26	0.111577	0.379404	0.547856	0.393786	0.438197	0.423641
	404.736	0.680567	365.001	2520.25	1047.29	50.0094	0.643877	485.442	2884.79	1242.97	0.107548	0.511683	0.483457	0.418851	0.460704	0.435513
	319.612	0.716034	340.306	2223.3	869.754	43.4684	0.648097	394.86	2968.07	1268.64	0.118818	0.452915	0.529588	0.402023	0.420563	0.44016
	399.057	0.717817	333.392	2318.92	892.139	57.6548	0.681514	462.433	2971.66	1218.92	0.122683	0.42064	0.523277	0.40599	0.458677	0.424336
	269.912	0.744239	369.371	2424.64	889.814	36.4211	0.662038	579.042	3212.17	1378.11	0.12149	0.393782	0.548668	0.395041	0.425111	0.431922
	347.807	0.775395	344.17	2257.84	777.657	33.8349	0.670515	456.007	2852.91	1206.72	0.0881566	0.340854	0.590052	0.377208	0.456059	0.428215
	370.1	0.782632	329.01	2077.4	710.558	35.5783	0.693748	531.165	3124.59	1273.96	0.0852523	0.323892	0.605948	0.368032	0.46593	0.424259
	308.283	0.663788	288.768	2550.66	1047.07	112.496	0.587799	477.704	2863.28	1445.34	0.277509	0.579977	0.435027	0.426963	0.430295	0.448785
	323.684	0.709973	324.089	2398.2	923.83	42.6437	0.644196	432.85	3038.11	1288.86	0.112619	0.468722	0.507183	0.407699	0.415304	0.436316
	390.665	0.704331	371.741	2415.83	973.704	45.2747	0.672084	476.72	2796.68	1176.24	0.102956	0.454733	0.502883	0.409486	0.469717	0.424248
	290.437	0.715722	323.663	2263.73	869.85	56.5228	0.667271	473.565	3123.09	1264.34	0.15335	0.438531	0.527362	0.403564	0.442042	0.431068
	397.451	0.625173	321.265	2628.28	1183.98	86.622	0.61304	456.31	2959.47	1404.64	0.180517	0.623459	0.420576	0.434021	0.409899	0.446493
	396.616	0.718401	341.503	2413.06	919.951	54.3402	0.653722	445.22	2894.24	1253.37	0.119959	0.438528	0.511266	0.404871	0.43295	0.432992
	415.41	0.695507	360.585	2559.05	1028.43	52.3607	0.679564	524.151	3229.52	1308.06	0.110646	0.46484	0.474168	0.413975	0.446757	0.425546
	335.2	0.687198	338.197	2477.3	1006.6	38.7238	0.647793	491.824	3046.59	1343.19	0.1019	0.498739	0.478786	0.415534	0.429026	0.435421
	328.19	0.67645	350.958	2535.18	1052.54	47.8071	0.64863	428.325	2942.11	1231.11	0.128466	0.515554	0.469985	0.419129	0.435309	0.434381
	342.041	0.718282	347.906	2381.65	917.995	45.3871	0.708077	456.983	3292.15	1201.98	0.116036	0.408646	0.514893	0.405211	0.456522	0.415971
	371.882	0.706365	347.683	2420.25	951.976	45.4444	0.684542	459.239	3146.1	1244.85	0.105293	0.438336	0.503256	0.409424	0.435695	0.423737
	444.053	0.677547	339.21	2471.82	1023.9	75.8406	0.66199	407.786	2724.83	1163.53	0.143278	0.49602	0.467242	0.418505	0.463452	0.428377
	398.705	0.745876	334.692	2287.85	837.672	64.5326	0.668611	420.406	3137.19	1175.95	0.135276	0.389876	0.546223	0.390381	0.450017	0.42763
	319.209	0.728989	366.071	2413.97	914.542	42.8682	0.68623	400.946	2942.94	1156.44	0.117488	0.406889	0.526429	0.400204	0.446077	0.423904
	407.36	0.748487	369.416	2424.49	885.154	40.1351	0.647848	572.686	3237.04	1407.72	0.0890399	0.397047	0.540001	0.392361	0.431472	0.432275
	347.832	0.699071	382.083	2556.6	1031.27	51.3767	0.65981	443.509	3061.36	1280.47	0.128389	0.46748	0.486471	0.412297	0.428797	0.43142
	314.05	0.711266	343.995	2408	933.691	49.8423	0.695484	470.359	3116.29	1201.76	0.156159	0.423776	0.509043	0.407972	0.450649	0.420475
	404.246	0.737782	347.808	2334.99	867.754	55.1111	0.690829	431.551	2711.76	1089.07	0.120848	0.388613	0.543605	0.396782	0.504241	0.420102
	322.371	0.741909	353.753	2354.77	864.513	41.7059	0.67897	380.414	2943.82	1165.63	0.114476	0.39564	0.53437	0.395678	0.444934	0.426975
	362.122	0.742188	371.319	2515.97	918.884	46.9459	0.652536	471.511	2710.5	1207.04	0.113845	0.408052	0.526135	0.397967	0.457083	0.432956
	453.592	0.755727	320.477	2269.4	796.558	98.2152	0.679521	423.921	2670.24	1124.23	0.161731	0.36514	0.548504	0.390707	0.489083	0.425529
	355.381	0.748103	349.371	2338.1	844.832	56.9796	0.674471	379.126	3017.9	1177.84	0.135989	0.383076	0.550029	0.393516	0.420245	0.425655
	332.807	0.725282	372.372	2533.84	956.863	38.3068	0.679376	473.508	3207.47	1264.81	0.103294	0.413898	0.507048	0.403167	0.443823	0.425099
	430.133	0.71335	333.382	2447.54	936.053	61.641	0.641058	477.823	3186.02	1290.17	0.11981	0.45909	0.501793	0.408798	0.445185	0.43653
	350.294	0.728183	346.299	2384.53	900.686	42.4979	0.739749	397.65	2697.19	954.953	0.107536	0.379241	0.530421	0.40098	0.534696	0.397935
	426.651	0.746813	326.738	2201.76	806.983	72.0729	0.652921	394.528	2840.65	1175.39	0.140455	0.403291	0.56159	0.38889	0.458337	0.431468
	383.636	0.712388	354.974	2415.65	944.343	51.5335	0.675539	371.79	2817.79	1133.62	0.118064	0.434329	0.508247	0.407215	0.432409	0.434688
	325.377	0.738035	315.327	2297.17	828.428	76.0088	0.675085	339.116	2645	1059.59	0.197678	0.393674	0.523692	0.398076	0.466163	0.427833
	370.701	0.713537	354.82	2405.16	937.342	50.6092	0.681817	489.591	3126.16	1268.61	0.118292	0.429966	0.514617	0.406694	0.444304	0.427069
	411.337	0.682666	354.902	2386.43	995.2	70.9423	0.630194	358.53	2683.54	1167.44	0.147004	0.516358	0.498644	0.417068	0.435144	0.438271
	307.965	0.738721	334.398	2316.65	849.879	39.2042	0.652831	344.994	2771.9	1187.95	0.114935	0.408271	0.534084	0.397567	0.431124	0.440753
	330.516	0.739008	370.654	2535.24	933.575	38.0865	0.695116	481.429	3332.88	1246.76	0.101401	0.384323	0.515476	0.39789	0.444143	0.423796
	360.969	0.738026	322.768	2256.33	824.24	72.591	0.658287	418.001	2858.37	1208.9	0.20371	0.410027	0.537911	0.396605	0.44426	0.43403
	436.703	0.747059	356.83	2334.85	854.546	59.7209	0.706868	385.716	2824.44	1075.03	0.11943	0.36389	0.542605	0.395606	0.467851	0.42117
	297.607	0.681411	355.276	2380.64	995.118	28.9786	0.693724	501.739	3663.94	1352.67	0.0875867	0.469343	0.506224	0.416961	0.420679	0.426175
	310.219	0.694214	295.643	2285.75	903.16	112.279	0.658411	391.88	2716.63	1158.23	0.287426	0.475027	0.486287	0.413547	0.451719	0.428324
	325.785	0.667363	357.711	2712.17	1139.21	60.0034	0.641634	460.418	3095.01	1356.89	0.133239	0.530508	0.453524	0.422122	0.413395	0.440381
	398.27	0.705775	344.734	2348.93	930.223	54.4858	0.680289	374.014	2894.13	1128.01	0.120096	0.441259	0.501994	0.407901	0.44507	0.426317
	274.286	0.693962	365.744	2547.33	1032	35.8135	0.65625	534.34	3257.35	1414.03	0.11535	0.483025	0.495317	0.411979	0.422354	0.437578
	363.726	0.669367	353.976	2462.3	1046.88	52.3905	0.650213	402.908	2931.53	1203.11	0.127525	0.521975	0.472787	0.420076	0.420476	0.432828
	279.69	0.72814	361.662	2586.68	958.658	38.9828	0.674164	486.979	2930.07	1224.65	0.125777	0.423219	0.50738	0.403436	0.460746	0.426273
	345.014	0.725693	342.667	2472.75	920.422	41.9556	0.679429	366.464	2771.4	1096.42	0.112074	0.412177	0.506072	0.404745	0.431911	0.432513
	316.329	0.723656	355.679	2420.94	920.822	47.5992	0.713655	428.235	3110.36	1105.52	0.131012	0.40362	0.514031	0.402567	0.475219	0.414826
	271.181	0.726446	354.739	2469.12	929.563	36.1121	0.655035	432.049	3012.5	1241.9	0.121131	0.429792	0.51172	0.403196	0.441164	0.434417
	302.963	0.703469	334.794	2445.74	958.306	36.328	0.664002	425.929	3336.91	1308.84	0.108324	0.462656	0.501947	0.409923	0.400663	0.431984
	310.943	0.746927	374.65	2520.17	912.601	45.1057	0.806435	471.76	3058.13	921.524	0.130193	0.319761	0.530872	0.396461	0.560435	0.380527
test_2021_07_11_13_44	263.008	0.771414	351.719	2341.44	792.766	34.7668	0.67467	415.338	2841.25	1167.89	0.114813	0.343761	0.571802	0.381104	0.442396	0.432656
test_2021_07_11_13_46	326.422	0.728882	370.872	2446.25	926.951	31.1313	0.686321	415.597	3165.47	1196.3	0.0866401	0.407534	0.515878	0.402047	0.412623	0.429706
	359.993	0.704561	373.493	2413.24	966.026	40.0674	0.689265	402.935	2798.38	1099.2	0.0988992	0.443445	0.502679	0.407321	0.450872	0.425233
	368.246	0.732916	326.179	2199.59	823.55	56.446	0.672115	347.747	2496.99	1017.74	0.127148	0.409145	0.536881	0.39729	0.460771	0.42662
	298.807	0.62876	322.803	2255.25	1036.12	145.361	0.601682	958.216	2966.24	1644.4	0.227919	0.689219	0.480565	0.426242	0.367612	0.449603
	303.213	0.70842	318.048	2195.44	859.184	37.9289	0.692365	329.979	2657.09	1012.66	0.111855	0.436449	0.521718	0.403482	0.430762	0.432414
	379.887	0.752909	359.323	2371.72	852.596	68.1698	0.683332	389.051	2811.43	1102.58	0.125891	0.366589	0.544456	0.389564	0.46015	0.429843
	345.655	0.701754	329.067	2206.11	881.316	48.3087	0.672506	308.599	2588.96	1025.06	0.124723	0.453136	0.518436	0.408249	0.422237	0.434639
	415.34	0.67185	343.625	2270.49	973.588	55.8822	0.657069	332.734	2514.13	1046.61	0.115954	0.511146	0.486748	0.417647	0.439303	0.434845
	293.857	0.706339	379.819	2496.57	997.723	35.2008	0.690443	380.403	2799.78	1074.85	0.10815	0.436444	0.50078	0.408222	0.435392	0.428691
	290.872	0.73775	295.295	2170.3	782.231	39.2872	0.690149	323.151	2886.68	1047.92	0.210921	0.390899	0.537136	0.397702	0.409073	0.434343
	384.5	0.717558	333.594	2242.16	870.047	55.0376	0.69391	318.097	2675.52	1017.5	0.115226	0.411673	0.517704	0.403225	0.429145	0.429887
	457.801	0.747555	325.374	1992.46	747.843	57.6641	0.713719	340.663	2367.21	889.614	0.110019	0.361496	0.576028	0.382608	0.501956	0.410811
	447.159	0.706635	322.654	2314.16	904.719	63.9034	0.667074	380.356	2675.67	1118.91	0.121294	0.449587	0.502048	0.408524	0.430108	0.432976
	463.642	0.748618	321.663	2064.78	759.041	75.7542	0.665378	375.382	2734.63	1137.96	0.12427	0.384982	0.568451	0.387607	0.422844	0.435193
	419.701	0.703534	349.793	2283.54	919.919	45.723	0.635922	409.37	2816.21	1249.12	0.0972345	0.478248	0.513825	0.408458	0.399103	0.443276
	380	0.678028	356.623	2439.14	1018.55	43.3785	0.654239	471.522	2912.26	1226.17	0.102954	0.508563	0.476198	0.416059	0.4178	0.435432
	343.737	0.713929	314.662	2151.5	831.107	58.5263	0.690433	263.212	2469.08	931.362	0.175412	0.423276	0.520124	0.403054	0.431136	0.433307
	499.224	0.744718	321.262	2148.32	786.068	82.7049	0.669939	376.405	2494.65	1036.66	0.120966	0.389537	0.552593	0.390701	0.457756	0.42792
	379.799	0.728329	353.139	2237.84	859.515	46.4573	0.657588	377.085	2688.23	1134.02	0.110389	0.427018	0.539981	0.398142	0.430291	0.435205
	427.695	0.687635	334.439	2352.84	961.164	60.02	0.646196	314.158	2485.47	1063.65	0.121873	0.495662	0.491489	0.414641	0.430855	0.438693
	235.876	0.693763	298.587	2221.94	881.579	56.555	0.739763	225.487	2636.02	843.925	0.283295	0.419891	0.499892	0.412465	0.420475	0.423472
	294.522	0.680373	293.907	2198.04	896.841	67.5121	0.662054	302.986	2585.01	1047.57	0.226408	0.495076	0.490563	0.415061	0.416619	0.436009
	432.758	0.734835	316.034	2159.83	814.45	86.5577	0.709451	344.485	2474.71	946.613	0.167241	0.377463	0.543847	0.393329	0.479342	0.419508
	373.892	0.696469	365.242	2418.79	980.526	39.7542	0.646153	354.89	2761.12	1154.77	0.09565	0.485216	0.495771	0.411276	0.429458	0.442037
	329.717	0.745339	334.883	2351.76	841.264	36.6235	0.656827	372.151	2771.13	1132.23	0.100618	0.400816	0.52818	0.395027	0.432387	0.433631
	222.03	0.731793	258.257	2076.92	736.719	84.9525	0.706213	235.754	2273.4	815.084	0.358546	0.387475	0.537228	0.399756	0.456292	0.431001
	264.718	0.723139	373.678	2467.07	946.143	31.5395	0.645432	344.097	2757.4	1155.58	0.108091	0.443659	0.513411	0.402461	0.407812	0.444352
	445.265	0.707572	343.522	2288.89	906.292	63.5533	0.657562	345.094	2755.34	1138.47	0.120599	0.454214	0.515924	0.405574	0.429185	0.43769
	379.844	0.752157	319.222	2118.57	763.267	41.6533	0.683671	298.385	2574.65	988.565	0.100604	0.375802	0.566312	0.3877	0.435418	0.435508
	337.575	0.686189	362.975	2436.14	1003.83	45.1872	0.703152	247.414	2660.14	950.276	0.117041	0.453781	0.481973	0.414103	0.407583	0.433639
	330.616	0.749241	350.661	2300.92	832.506	38.621	0.674446	359.828	2925.88	1117.66	0.100572	0.381235	0.547084	0.391319	0.413722	0.433081
	358.275	0.699497	334.7	2361.38	935.832	59.7557	0.69838	282.19	2267.62	859.475	0.143965	0.434913	0.493156	0.410994	0.482281	0.423704
	372.855	0.717444	319.545	2295.68	873.503	54.1063	0.732354	304.368	2426.31	839.454	0.124707	0.392011	0.517471	0.40703	0.49423	0.408815
	415.573	0.729848	319.795	2175.51	820.324	56.5403	0.700413	341.557	2555.46	966.468	0.117161	0.393097	0.542494	0.39782	0.463736	0.417662
	361.917	0.713441	340.447	2188.14	865.719	48.1961	0.68225	405.65	2803.06	1121.66	0.110691	0.431001	0.531668	0.400795	0.433513	0.42954
	387.737	0.72244	331.303	2336.25	885.115	55.9635	0.655673	315.413	2543.69	1064.01	0.123883	0.430851	0.513229	0.405009	0.429393	0.438385
	285.912	0.602347	318.845	2503.51	1184.35	73.1656	0.678941	287.549	2492.96	979.35	0.200277	0.596409	0.426571	0.43707	0.429607	0.436706
	452.868	0.72024	343.256	2258.61	874.041	59.1324	0.666529	320.946	2621.82	1051.14	0.114192	0.428496	0.5194	0.402757	0.425671	0.431842
	428.322	0.668035	337.462	2248.52	963.674	91.3224	0.641529	322.243	2429.71	1059.02	0.171847	0.526986	0.493492	0.418171	0.43654	0.439991
	339.683	0.74133	363.763	2382.22	881.348	40.4611	0.666291	376.545	3049.24	1192.75	0.106558	0.399656	0.538936	0.39588	0.406002	0.435066
	404.991	0.705869	343.673	2236.01	900.309	57.7956	0.664889	293.348	2593.67	1041.31	0.11885	0.455109	0.523236	0.4048	0.411263	0.439564
	329.908	0.701134	336.865	2301.2	919.52	45.3969	0.665999	344.104	2759.04	1083.51	0.123225	0.46591	0.509488	0.408839	0.420386	0.436185
	304.739	0.689716	358.32	2407.1	986.15	40.0616	0.660853	337.578	2850.5	1146.66	0.117401	0.480468	0.492862	0.411833	0.409314	0.44135
	358.952	0.757127	350.331	2260.57	807.062	40.3606	0.665682	270.438	2322.21	933.494	0.098237	0.373156	0.55965	0.387197	0.440668	0.434428
	372.936	0.716722	320.26	2198.55	846.156	56.5497	0.676041	351.314	2651.74	1068.39	0.129598	0.426679	0.525206	0.402938	0.437415	0.429878
	363.674	0.721824	325.593	2174.65	839.404	58.1842	0.680987	272.3	2325.93	898.567	0.136207	0.415295	0.536478	0.401674	0.46597	0.431479
	326.29	0.705405	349.338	2284.59	910.936	42.7596	0.675062	339.322	2689.05	1050.19	0.115593	0.453226	0.510501	0.407531	0.411773	0.440769
	387.261	0.733124	334.766	2183.55	822.984	70.1613	0.671152	288.387	2530.34	1009.08	0.147384	0.403593	0.534768	0.39631	0.435752	0.43297
	332.821	0.695543	333.787	2332.26	946.095	50.6195	0.717312	314.169	2650.41	936.01	0.131052	0.431619	0.499883	0.409708	0.430829	0.426929
	332.031	0.720159	352.122	2351.98	903.06	50.0478	0.653104	341.335	2554.85	1074.62	0.132053	0.437004	0.514701	0.402581	0.436479	0.438548
	299.489	0.716173	332.534	2089.04	824.736	48.0382	0.667666	313.096	2642.76	1047.5	0.136406	0.438438	0.54189	0.398222	0.418383	0.436055
	438.765	0.71075	326.786	2207.21	865.953	88.8577	0.701802	288.218	2200.49	842.503	0.166633	0.418386	0.524146	0.4051	0.482259	0.418564
	305.305	0.739815	362.324	2315.81	881.237	49.1795	0.678479	312.005	2493.03	981.566	0.14006	0.394446	0.551812	0.387904	0.446073	0.43081
	435.878	0.698052	326.073	2193.51	883.315	66.6323	0.671491	330.884	2596.29	1044.22	0.124694	0.457895	0.515742	0.40761	0.429977	0.436315
	362.632	0.660027	360.869	2338.15	1017.21	60.4386	0.651388	240.265	2580.99	1024.83	0.138446	0.531276	0.475641	0.418262	0.385632	0.444047
	424.576	0.679906	352.071	2290.54	968.753	56.7494	0.676378	279.807	2456.05	962.631	0.114662	0.484738	0.502247	0.413213	0.425966	0.436777
	357.667	0.714401	346.161	2335.21	921.714	57.8084	0.682068	297.321	2355.79	913.755	0.13088	0.424717	0.523467	0.402495	0.440997	0.429044
	327.424	0.733272	345.723	2383.1	885.731	43.7778	0.697468	362.328	2707.64	1038.29	0.118519	0.38977	0.522474	0.398742	0.437964	0.424577
	330.618	0.731272	289.613	2199.25	809.279	105.97	0.696784	314.119	2417.91	930.431	0.229791	0.393868	0.530971	0.399239	0.463778	0.426068
	381.117	0.729258	324.296	2177.11	820.917	52.0121	0.679028	335.679	2427	968.55	0.111536	0.411723	0.543066	0.395241	0.456792	0.425536
	429.017	0.687948	356.262	2410.33	990.964	59.4438	0.693012	286.214	2539.28	955.999	0.12012	0.455684	0.496236	0.415234	0.440898	0.433411
	304.142	0.68952	352.741	2410.52	981.305	34.6263	0.708829	305.189	2794.57	993.717	0.103341	0.447879	0.481876	0.411925	0.406764	0.429374
test_2021_07_11_13_48	297.623	0.711879	349.109	2472.03	958.696	49.3973	0.646738	406.468	2774.95	1202.91	0.146488	0.457508	0.502939	0.406844	0.437073	0.43892
test_2021_07_11_13_50	238.19	0.675597	353.807	2486.55	1052.55	38.3359	0.706778	395.102	2837.32	1032.43	0.138263	0.470143	0.489736	0.411258	0.466346	0.417065
	319.747	0.682255	330.195	2389.63	978.555	41.1444	0.648008	469.514	3199.39	1371.51	0.11348	0.504572	0.488605	0.41645	0.413517	0.435006
	255.416	0.715487	369.516	2457.74	955.593	34.1068	0.677344	418.914	2795.35	1108.09	0.118599	0.434709	0.517997	0.405431	0.467126	0.421493
	312.201	0.689334	312.77	2354.6	949.871	41.6115	0.651979	330.652	2714.98	1123.88	0.128789	0.493643	0.496619	0.413564	0.43938	0.438231
	381.385	0.739273	330.755	2246.11	830.632	39.5761	0.672941	386.855	3218.54	1211.34	0.0905681	0.400729	0.543155	0.394647	0.425486	0.433873
	260.282	0.711859	365.76	2469.11	965.448	30.4033	0.674099	361.426	3123.35	1126.71	0.105943	0.446132	0.511789	0.406634	0.438724	0.429423
	323.077	0.710079	341.001	2439.95	946.388	50.3521	0.623949	395.305	2641.43	1209.05	0.132001	0.481973	0.501966	0.407693	0.454734	0.440737
	415.13	0.663136	321.837	2264.62	975.546	48.4286	0.600469	371.05	2796.1	1288.55	0.103346	0.581177	0.495453	0.419838	0.423117	0.446053
	311.86	0.668969	327.394	2411.4	1014.99	53.1	0.658495	371.321	2818.2	1167.55	0.138209	0.519003	0.482601	0.4208	0.432708	0.428642
	305.819	0.68239	314.226	2368.59	961.082	38.6577	0.629806	315.258	2509.91	1083.19	0.136247	0.524456	0.489058	0.419604	0.402859	0.447994
	345.145	0.726453	350.96	2410.6	917.233	42.0271	0.661153	404.333	3335.5	1238.85	0.106335	0.42116	0.522669	0.398994	0.435091	0.432968
	361.865	0.745633	320.339	2322.9	826.973	67.7306	0.696676	422.24	2807.71	1088.96	0.132734	0.374659	0.541034	0.395294	0.476719	0.420132
	303.532	0.713195	325.86	2374.59	909.777	42.9402	0.650495	414.673	2944.28	1236.36	0.122152	0.451999	0.516196	0.406249	0.418638	0.438788
	423.388	0.781177	288.417	2188.71	702.662	186.417	0.671423	356.802	2626.63	1081.25	0.269621	0.33236	0.57037	0.379708	0.465748	0.430371
	386.468	0.697786	318.014	2360.62	934.801	45.5714	0.649782	384.549	2829.92	1196.13	0.107303	0.479669	0.506176	0.413255	0.427165	0.438406
	356.553	0.664327	322.699	2383.97	1011.37	45.0146	0.633579	397.032	3217.21	1266.08	0.113301	0.552969	0.481271	0.422428	0.406118	0.440798
	423.121	0.692888	324.237	2260.74	921.256	44.9836	0.645297	415.406	3182.29	1302.33	0.0907956	0.485695	0.521772	0.4096	0.406623	0.439281
	374.808	0.743737	341.741	2370.05	859.263	42.3986	0.672142	375.508	2857.59	1150.17	0.102919	0.393686	0.534289	0.394306	0.453258	0.429518
	347.67	0.692114	316.406	2258.14	912.183	47.8743	0.641295	438.409	2868.5	1252.44	0.117854	0.493694	0.511178	0.40982	0.418099	0.441163
	200.61	0.745887	348.856	2492.14	883.119	28.0915	0.677639	484.645	3517.95	1223.95	0.188785	0.387476	0.528833	0.39805	0.417677	0.436202
	261.994	0.69469	369.374	2558.01	1031.48	37.0056	0.625956	473.115	3146.2	1340.67	0.118652	0.508797	0.488276	0.413699	0.419237	0.444123
	360.849	0.719354	323.121	2310.92	880.374	43.6159	0.638117	416.186	2852.02	1251.62	0.106905	0.452997	0.524401	0.402857	0.427672	0.441686
	287.374	0.72568	307.434	2345.15	860.641	42.0998	0.622431	414.397	2925.8	1269.33	0.165777	0.457717	0.520189	0.403409	0.410661	0.446967
	190.438	0.625287	309.147	2423.92	1088.94	43.858	0.699562	434.924	3153.73	1175.54	0.18276	0.556483	0.455218	0.431596	0.431055	0.42287
	403.923	0.661716	326.078	2432.65	1034.28	52.7729	0.613884	468.435	2905.39	1338.33	0.116742	0.571593	0.472892	0.424167	0.424462	0.446847
	304.743	0.755201	332.45	2229.18	794.641	39.9646	0.661667	365.573	3041.02	1122.65	0.110887	0.380833	0.565537	0.388185	0.445672	0.434443
	317.341	0.727833	325.148	2327.82	868.312	57.9059	0.66115	256.533	2610.49	1013.82	0.149686	0.425729	0.527021	0.399225	0.413988	0.441004
	383.292	0.688489	330.209	2339.31	954.361	50.7077	0.607075	338.245	2520.75	1146.07	0.117404	0.532807	0.491849	0.414265	0.42239	0.448196
	386.79	0.698349	316.377	2407.1	946.318	61.4	0.668243	467.113	3038.75	1247.86	0.128658	0.462283	0.496662	0.41323	0.430009	0.429387
	310.385	0.726297	316.3	2249.38	840.153	47.7473	0.63961	338.86	2571.74	1120.66	0.144094	0.436561	0.530305	0.400734	0.429372	0.440158
	341.863	0.700608	327.69	2328.38	921.509	59.3858	0.655377	379.182	2612.27	1116.48	0.152059	0.466213	0.514421	0.410602	0.458343	0.434154
	321.978	0.726986	329.969	2281.39	862.391	40.563	0.6619	403.136	3004.83	1198.25	0.111081	0.424175	0.533086	0.397904	0.419145	0.439045
	391.712	0.72861	322.789	2230.11	838.774	60.744	0.653335	424.526	2913.47	1239.12	0.125816	0.423776	0.536869	0.398275	0.426325	0.435437
	441.213	0.717308	322.78	2256.52	867.717	78.0651	0.665781	329.638	2578.1	1061.62	0.144599	0.431393	0.527779	0.40451	0.457455	0.43177
	449.935	0.725163	310.347	2302.3	859.049	65.6449	0.627143	409.724	2655.52	1197.28	0.121936	0.451755	0.51352	0.402281	0.445525	0.442275
	351.952	0.747863	325.053	2208.61	798.417	38.432	0.683683	388.675	3793.23	1202.97	0.100958	0.379959	0.551522	0.388482	0.427996	0.431516
	422.853	0.746191	324.938	2121.45	781.996	53.4474	0.673311	380.913	2900.48	1155.26	0.112557	0.383164	0.562749	0.387637	0.433861	0.429985
	397.585	0.732424	332.013	2294.14	859.486	48.5902	0.635989	344.218	2790.5	1074.91	0.105748	0.431198	0.531235	0.399316	0.437375	0.436657
	409.491	0.70384	309.994	2237.43	880.21	54.9263	0.671262	348.265	2770.07	1103.18	0.119055	0.453299	0.517281	0.407441	0.429262	0.432453
	416.016	0.714433	323.279	2276.9	881.381	55.2383	0.73421	301.65	2444.2	849.296	0.11425	0.392777	0.520235	0.405279	0.501435	0.409632
	398.677	0.672148	320.971	2292.5	963.723	66.0516	0.648259	297.381	2658.87	1112.38	0.137679	0.518968	0.499657	0.419077	0.431673	0.440377
	444.984	0.744502	274.798	2096.5	735.311	133.764	0.657572	346.359	2476.32	1060.76	0.207298	0.395853	0.552536	0.393892	0.451996	0.430896
	384.973	0.730291	325.205	2357.81	871.059	51.6417	0.671464	433.493	3068.1	1265.18	0.116341	0.406382	0.514191	0.400909	0.423645	0.431604
	458.942	0.719629	326.411	2198.76	852.941	72.1053	0.703229	369.038	2824.49	1077.73	0.130022	0.404036	0.530444	0.400979	0.449346	0.42105
	386.984	0.688755	343.278	2361.07	973.54	61.4301	0.699634	357.019	3073.62	1058.43	0.134651	0.453993	0.500487	0.413029	0.473062	0.418873
	398.536	0.791735	310.169	2073.49	675.602	46.2467	0.646674	434.018	3182.13	1290.54	0.101571	0.331992	0.607232	0.368686	0.413687	0.436571
	397.541	0.780416	307.591	2129.94	704.481	50.5877	0.633152	377.796	3012.04	1251.36	0.110803	0.358991	0.587263	0.377335	0.41323	0.441498
	471.975	0.712477	332.328	2234.72	882.463	90.4279	0.680696	331.249	2354.32	953.919	0.154043	0.430917	0.528791	0.403074	0.508425	0.421704
	375.803	0.730873	316.286	2314.28	852.669	62.8063	0.635633	418.342	2776.88	1241.91	0.139764	0.430782	0.523181	0.399236	0.430914	0.439497
	401.451	0.745959	311.412	2186.39	785.054	63.7704	0.706177	291.173	2415.76	891.893	0.132679	0.367958	0.552645	0.390953	0.48103	0.423434
	286.489	0.725868	352.066	2498.58	934.486	39.7181	0.669941	436.535	3024.13	1197.1	0.12315	0.422984	0.499169	0.404531	0.424924	0.438291
	398.914	0.753473	326.408	2174.93	780.439	64.2323	0.680112	317.594	2632.81	1026.87	0.139923	0.37044	0.568456	0.387203	0.457558	0.427967
	335.882	0.716794	329.797	2398.62	907.861	50.7711	0.645197	381.609	2807.61	1208.18	0.13372	0.448773	0.504173	0.406218	0.429726	0.437788
	419.072	0.704945	326.765	2317.01	911.012	66.9203	0.72336	344.4	2937.01	1023.07	0.134836	0.41361	0.513858	0.408576	0.457666	0.420013
	387.343	0.719064	311.543	2179.1	834.231	64.4448	0.666436	342.597	2653.59	1089.42	0.141973	0.429597	0.533957	0.402133	0.44941	0.4322
	368.757	0.691946	321.224	2368.02	948.629	71.5976	0.670264	278.369	2541.7	998.396	0.176235	0.471014	0.497801	0.413664	0.442382	0.434343
	410.585	0.725384	294.124	2417.3	873.207	127.637	0.579933	375.216	2513.51	1261.36	0.244687	0.481567	0.494254	0.406926	0.433197	0.448682
	287.42	0.749504	310.55	2201.97	778.695	50.7979	0.65189	338.546	2728.15	1131.74	0.147724	0.395523	0.553777	0.391209	0.413159	0.438995
	392.342	0.73348	313.077	2338.03	850.668	76.3168	0.692288	361.111	2635.49	1027.87	0.15397	0.393988	0.52734	0.400547	0.480266	0.421287
	333.813	0.710502	330.836	2330.88	904.112	55.1811	0.674822	270.697	2554.61	998.08	0.144305	0.440829	0.516026	0.406581	0.430175	0.435807
	342.153	0.721521	315.655	2191.45	835.451	54.4059	0.770338	350.551	2630.04	834.602	0.136729	0.371075	0.54132	0.399838	0.526258	0.390206
	388.682	0.749695	297.018	2165.77	764.713	100.315	0.694956	318.723	2514.65	972.776	0.203403	0.366905	0.551963	0.391512	0.46814	0.42432
	373.27	0.690779	337.725	2386.33	969.137	64.2057	0.674279	304.021	2463.79	975.018	0.139319	0.469935	0.496244	0.413256	0.47767	0.427567
	427.17	0.758697	320.15	2224.95	774.733	62.6926	0.691263	334.064	2663.53	1014.21	0.124511	0.355446	0.564251	0.387711	0.454417	0.423476
	342.987	0.718669	324.358	2307.59	880.282	45.0415	0.673463	341.615	2677.36	1059.07	0.11604	0.42494	0.516277	0.405822	0.430814	0.435614
	363.397	0.724408	314.748	2262.66	847.364	77.4404	0.671171	300.063	2507.8	1003.81	0.194888	0.416857	0.518515	0.402616	0.456565	0.431384
	319.63	0.72654	337.979	2460.21	913.182	59.5556	0.73166	277.218	2459.23	853.664	0.160671	0.376973	0.501344	0.404651	0.484387	0.425512
	371.796	0.577777	353.502	2660.69	1319.39	69.4024	0.657134	299.515	2501.24	1034.44	0.150418	0.653857	0.406923	0.440675	0.440359	0.437793
	391.911	0.705371	330.84	2352.13	922.619	59.9965	0.67413	320.13	2928.36	1098.27	0.132229	0.445906	0.502524	0.408835	0.429448	0.434033
	364.317	0.738927	324.745	2301.89	839.072	57.7856	0.688728	334.621	2634.86	1019.46	0.130285	0.385649	0.538389	0.396363	0.460642	0.426795
	359.749	0.760227	326.176	2278.42	790.401	51.47	0.734129	340.905	2606.01	917.361	0.125446	0.331784	0.559345	0.388719	0.487265	0.413516
	296.857	0.75091	337.606	2353.8	833.787	42.869	0.686911	382.428	2853.62	1095.92	0.126817	0.374325	0.542643	0.392545	0.445519	0.425649
	417.524	0.795596	324.429	2131.22	693.893	59.0714	0.685862	341.445	2699.67	1045.36	0.118502	0.305758	0.603598	0.366367	0.445754	0.426225
	324.878	0.75573	321.114	2214.66	782.493	45.1441	0.708591	317.627	2413.54	913.72	0.124795	0.352133	0.561281	0.387578	0.488408	0.421513
	273.082	0.715696	350.249	2407.13	926.019	45.8795	0.724805	271.422	2483.54	850.675	0.143988	0.39905	0.523358	0.405247	0.462816	0.421397
	310.059	0.688806	351.571	2445.34	1000.73	55.6957	0.634332	380.076	2963.02	1296	0.153716	0.500665	0.493704	0.414283	0.396489	0.442983
	309.004	0.745452	326.195	2303.31	822.051	42.6996	0.728449	307.46	2538.24	868.868	0.120392	0.354509	0.541731	0.394503	0.489276	0.410803
	320.831	0.713785	327.68	2356.43	904.985	50.7282	0.659634	302.707	2418.41	1003.35	0.132739	0.443792	0.517678	0.404744	0.455371	0.434225
	260.314	0.725181	329.437	2316.49	869.409	37.7582	0.697133	307.574	2704.89	988.733	0.125155	0.402811	0.532686	0.400314	0.434178	0.430462
	267.787	0.688711	329.623	2422.27	973.193	39.3013	0.656688	358.507	2844.43	1160.16	0.131227	0.487956	0.493613	0.415182	0.410323	0.439162
test_2021_07_11_13_53	346.618	0.691823	355.018	2574.79	1035.76	42.0345	0.684907	445.917	3204.63	1210.03	0.098145	0.46441	0.479764	0.414165	0.443901	0.424739
test_2021_07_11_13_54	393.126	0.726004	311.902	2198.48	827.957	64.2381	0.658668	466.479	3035.6	1278.48	0.122378	0.428213	0.533503	0.400096	0.416224	0.436817
	444.713	0.751665	326.895	2113.1	774.312	56.8322	0.655157	391.923	2832.13	1194.7	0.108916	0.388755	0.571032	0.383764	0.42558	0.436046
	300.752	0.702436	322.252	2273.09	899.253	34.4563	0.720045	319.776	2895.36	987.212	0.108354	0.42109	0.524527	0.408999	0.443565	0.419986
	372.16	0.675484	296.085	2354.36	955.751	51.9808	0.73554	340.247	2802.49	952.76	0.126085	0.448732	0.468223	0.4192	0.483739	0.409619
	507.094	0.76388	315.057	2225.72	764.078	58.6866	0.745801	408.958	2691.03	947.143	0.103393	0.320459	0.562223	0.385905	0.524472	0.402336
	397.829	0.733925	311.07	2269.21	833.038	51.9621	0.645537	433.206	3078.06	1298.7	0.108937	0.425613	0.536668	0.398393	0.411859	0.439528
	345.733	0.68915	303.547	2311.97	921.744	50.8345	0.683804	345.141	2743.85	1061.67	0.128327	0.466053	0.492261	0.414245	0.448977	0.42643
	392.03	0.730314	321.649	2294.5	848.437	47.4458	0.685798	433.323	2781.56	1117.28	0.105729	0.400316	0.530324	0.399783	0.490677	0.428193
	327.684	0.74391	300.104	2336.58	818.751	54.493	0.654771	483.197	3004.74	1288.94	0.126739	0.404955	0.527072	0.398953	0.430514	0.428295
	364.546	0.747886	315.595	2284.46	809.71	38.6711	0.723426	321.691	2687.26	924.62	0.0963931	0.355094	0.538639	0.394859	0.455858	0.415906
	250.698	0.666776	317.814	2364.31	994.665	38.805	0.692241	335.871	2709.91	1006.75	0.135342	0.496616	0.48308	0.420293	0.443454	0.42959
	422.284	0.7527	348.324	2320.87	835.028	44.8531	0.688172	436.904	3024.24	1174.16	0.0955801	0.36999	0.55335	0.391243	0.451274	0.423655
	297.622	0.764898	353.793	2403.19	830.837	32.3112	0.676405	420.845	3014.14	1176.35	0.102043	0.361062	0.554494	0.387301	0.421431	0.428075
	403.364	0.740532	327.545	2325.14	843.255	39.404	0.662879	476.45	3064.78	1297.04	0.0838366	0.402588	0.537853	0.397302	0.422213	0.435012
	385.959	0.764252	332.808	2321.39	800.859	33.5174	0.697216	420.308	2847.73	1088.76	0.0788695	0.34859	0.553515	0.386947	0.457242	0.423075
	438.892	0.793087	319.143	2148.68	698.898	40.6583	0.689882	324.02	2884.02	1079.15	0.0805792	0.304982	0.598209	0.369394	0.433989	0.430584
	412.006	0.741021	330.338	2330.25	845.736	46.1988	0.649242	447.243	2891.34	1207.22	0.099983	0.411883	0.527305	0.396452	0.45104	0.434791
	420.216	0.733628	329.502	2161.37	818.415	43.0678	0.669277	347.697	2779.68	1101.1	0.091962	0.409192	0.550251	0.392328	0.444305	0.429429
	382.171	0.728263	312.962	2335.39	865.938	41.6875	0.678393	430.581	2807.49	1147.59	0.0990589	0.413544	0.520985	0.400269	0.440968	0.430075
	436.872	0.730943	334.634	2399.14	885.103	44.9311	0.658773	450.383	3092.09	1293.97	0.0934361	0.420585	0.520246	0.402323	0.414829	0.430864
	474.169	0.765614	306.887	2079.35	721.406	63.8019	0.651395	322.297	2697.58	1130.44	0.117003	0.367862	0.578218	0.382647	0.411724	0.442203
	382.352	0.752516	311.272	2178.17	774.081	47.8239	0.68124	364.346	3136.02	1155	0.108202	0.371885	0.559823	0.387847	0.434028	0.429899
	302.091	0.696188	319.543	2299.96	917.947	29.1322	0.679876	417.785	2903.54	1153.04	0.0864458	0.468124	0.514065	0.411229	0.445236	0.435665
	325.248	0.714574	359.526	2461.17	958.24	34.1714	0.658661	365.542	3020.35	1147.27	0.0957267	0.445966	0.51411	0.406715	0.425349	0.433887
	409.448	0.724063	343.981	2456.87	922.451	47.2663	0.685789	407.748	3141.29	1189.37	0.102556	0.41173	0.515724	0.404136	0.434397	0.428614
	226.101	0.698628	279.182	2238.6	864.499	45.6218	0.662609	332.942	2579.24	1047.11	0.179997	0.468704	0.506722	0.412143	0.427044	0.439736
	440.83	0.756804	309.432	2220.88	784.269	45.2185	0.658024	422.028	3004.75	1247.62	0.0951195	0.384862	0.5583	0.384537	0.417401	0.438467
	455.047	0.725705	318.635	2296.86	861.609	67.4215	0.692716	330.007	2668.12	1017.01	0.124225	0.402759	0.522571	0.402445	0.44876	0.426131
	392.308	0.734405	315.951	2287.97	846.232	43.4529	0.679764	417.604	2883.35	1146.86	0.101245	0.405137	0.545403	0.395479	0.434754	0.427951
	428.567	0.688169	319.862	2267.14	922.164	143.231	0.595679	868.43	2674.73	1507.68	0.193127	0.556239	0.496827	0.414569	0.405433	0.451711
	463.264	0.760932	309.605	2127.89	743.009	58.1695	0.701567	336.606	2594.79	979.438	0.107809	0.348006	0.576705	0.382867	0.483534	0.419758
	360.811	0.698813	320.915	2305.07	915.472	39.0769	0.684203	296.858	2719.25	1023.62	0.0983295	0.452022	0.502697	0.410147	0.422955	0.432514
	382.668	0.736905	323.253	2349.84	852.673	50.556	0.660756	366.539	2805.11	1146.31	0.114637	0.411444	0.531829	0.398581	0.434994	0.434267
	371.885	0.711082	326.018	2428.32	933.346	39.0577	0.686665	354.454	2975.13	1132.22	0.0945986	0.431321	0.502736	0.407767	0.418951	0.435022
	365.056	0.709011	332.273	2397.62	925.989	39.618	0.672039	355.736	2797.83	1132.27	0.0971957	0.445715	0.50452	0.408025	0.411095	0.438751
	413.67	0.702832	334.521	2500.96	973.402	59.56	0.663298	399.442	2832.62	1177.09	0.122983	0.460302	0.483678	0.413524	0.431981	0.432099
	329.45	0.691217	331.488	2465.65	984.383	58.8201	0.670557	307.318	2709.86	1046.14	0.133687	0.47431	0.476229	0.416227	0.429998	0.435903
	377.347	0.718253	340.97	2355.89	905.923	48.8711	0.706409	298.094	2572.82	920.6	0.116858	0.409575	0.512367	0.404977	0.466431	0.421748
test_2021_07_16_14_42	217.933	0.746623	405.348	2614.18	961.955	102.819	0.657705	538.503	3337.61	1450.17	0.314357	0.393196	0.534117	0.395438	0.418885	0.432404
test_2021_07_16_14_43	226.939	0.747036	415.244	2715.85	985.72	53.697	0.696952	545.301	3737.19	1382.82	0.199406	0.36905	0.530979	0.397219	0.44366	0.415175
	199.776	0.66832	387.319	2756.97	1168.24	82.3731	0.637898	467.788	2945.43	1329.97	0.292666	0.528275	0.441095	0.421627	0.430736	0.434128
	310.903	0.729251	412.676	2660.83	1021.99	68.625	0.646762	438.718	2882.27	1261.41	0.184622	0.425168	0.516149	0.401975	0.446171	0.433808
	280.851	0.710563	407.918	2625.32	1046.83	71.0928	0.601157	505.179	3045.85	1418.47	0.213146	0.501043	0.500844	0.40868	0.420349	0.441863
	251.55	0.683695	424.018	2931.26	1205.82	74.2875	0.657413	452.844	2913.46	1254.86	0.247585	0.493748	0.456383	0.41754	0.458223	0.429686
	361.985	0.691565	415.345	2695.02	1113.48	72.4211	0.59246	532.705	3008.05	1503.08	0.181887	0.539063	0.475683	0.414141	0.425287	0.444758
	288.97	0.734363	423.665	2846.14	1069.97	71.7879	0.646214	361.334	2583	1102.69	0.202975	0.419684	0.494711	0.402389	0.44967	0.4298
	342.543	0.740734	435.433	2906.64	1073.28	79.0433	0.640651	505.467	2915.66	1342.77	0.193159	0.413989	0.500485	0.399203	0.457302	0.435502
	315.929	0.69369	429.912	2757.36	1132.34	66.4762	0.65321	548.916	3465.38	1409.82	0.186708	0.488474	0.482881	0.413751	0.429323	0.432314
	199.215	0.724512	396.797	2633	998.93	99.16	0.687292	495.456	3124.41	1221.1	0.339097	0.407341	0.508021	0.403002	0.495337	0.422278
	362.479	0.678138	421.132	2781	1176.19	68.1831	0.630085	409.352	2719.69	1238.17	0.168809	0.520582	0.459284	0.419349	0.428773	0.438669
	400.553	0.70121	446.285	2853.56	1159.52	79.2033	0.647152	511.346	3099.63	1322.57	0.170984	0.470127	0.473128	0.412162	0.446428	0.437053
	300.163	0.669697	409.1	2607.99	1127.79	64.6589	0.597777	427.144	2912.81	1385.15	0.212188	0.56557	0.474511	0.42039	0.403306	0.446397
	367.838	0.753475	382.623	2521.53	911.233	86.3377	0.574066	452.297	2874.98	1451.59	0.190096	0.436767	0.539261	0.390573	0.405855	0.449608
	251.5	0.696113	415.072	2770.05	1133.18	41	0.716519	334.632	2550.21	938.318	0.147607	0.427125	0.470772	0.415434	0.441746	0.422413
	364.576	0.675392	429.098	2706.82	1162.86	66.3434	0.621175	445.528	2874.77	1320.38	0.162774	0.534974	0.46514	0.41977	0.422694	0.438259
	328.744	0.700599	420.333	2714.87	1102.42	75.1846	0.651379	545.711	3777.72	1413.2	0.192539	0.472581	0.479833	0.412541	0.43026	0.432574
	329.446	0.689497	416.282	2692.35	1115.74	64.973	0.641153	420.648	2841.04	1249.01	0.169155	0.495461	0.477382	0.414561	0.418203	0.439306
	420.575	0.77605	403.084	2512.95	874.674	79.9245	0.655071	449.277	2728.81	1209.57	0.170961	0.346439	0.556066	0.385967	0.458248	0.432927
	307.778	0.708256	405.587	2550.55	1017.27	110.406	0.625633	479.426	2865.88	1334.97	0.254908	0.476157	0.500255	0.407967	0.432012	0.439624
	308.684	0.752967	445.679	2928.14	1054.12	44	0.758958	232.661	2639.7	774.773	0.135806	0.32786	0.515781	0.395852	0.430557	0.419858
	305.98	0.702507	373.192	2664.18	1039.37	123.163	0.626352	506.546	2926.74	1363.04	0.28471	0.488336	0.47358	0.410755	0.436282	0.437113
	317.939	0.692877	414.374	2737.23	1119.96	60.2245	0.702881	514.045	3919.4	1267.08	0.169825	0.451808	0.474551	0.412151	0.452097	0.421555
	334.527	0.71371	411.118	2757.01	1076.81	106.076	0.581669	500.868	2719.96	1406.42	0.231354	0.500817	0.478953	0.408515	0.447219	0.447087
	314.179	0.688997	411.161	2677.84	1104.47	107.046	0.650373	429.975	2605.54	1174.27	0.241722	0.488672	0.481007	0.41504	0.473604	0.430093
	220.388	0.741274	382.124	2569.54	937.169	49.8806	0.712564	349.894	3176.73	1096.1	0.199108	0.371928	0.525485	0.395885	0.428487	0.421666
	350.629	0.669613	406.186	2561.12	1109.4	61.7857	0.680133	381.022	2936.36	1172.21	0.163225	0.493316	0.488477	0.418818	0.433695	0.431678
	298.515	0.75075	396.625	2683.08	955.603	78.0515	0.612988	367.124	2720	1251.44	0.217511	0.414838	0.515652	0.396919	0.406674	0.447712
	249.294	0.762258	410.726	2677.24	943.683	54.1765	0.674959	235.293	2735.35	1053.74	0.1806	0.354672	0.540316	0.390886	0.39795	0.441748
	354.514	0.739621	405.02	2670.94	991.247	84.7117	0.629173	401.288	3060.14	1333.72	0.20565	0.419953	0.502971	0.399297	0.406987	0.441584
	328.327	0.700573	432.865	2757.64	1116.89	73.7211	0.64667	493.538	3718.69	1368.43	0.197302	0.480217	0.479231	0.412135	0.427513	0.435995
	354.896	0.67446	434.757	2792.71	1196.61	90.7913	0.666598	427.862	2734.69	1173.01	0.206714	0.492641	0.463512	0.420462	0.466353	0.426244
	346.785	0.723949	428.306	2774.5	1071.79	102.797	0.633911	426.382	2797.47	1268.24	0.223088	0.442839	0.495298	0.406065	0.434793	0.437647
	290.829	0.748182	406.111	2561.01	943.965	71.9286	0.653398	374.287	2608.57	1113.91	0.201745	0.393578	0.529474	0.39443	0.445548	0.434562
	282.563	0.687685	406.651	2640.34	1093.32	83.6632	0.631872	448.028	3097.59	1304.99	0.26491	0.504958	0.477228	0.416615	0.442476	0.437168
	347.288	0.699096	402.386	2720.18	1087.77	88.0303	0.678628	428.998	2862.53	1192	0.203458	0.444463	0.484244	0.412151	0.458753	0.425104
	330.966	0.72937	396.939	2636.42	996.958	93.6011	0.673747	406.593	2675.59	1120.56	0.209002	0.410305	0.513612	0.402446	0.478621	0.427599
	264.562	0.677402	407.554	2788.63	1161.22	76.1875	0.661836	414.025	2710.12	1163.64	0.229199	0.498806	0.461522	0.415485	0.455822	0.434214
	322.325	0.690655	440.083	2869.28	1183.17	93.9634	0.636716	408.879	2647.1	1202.54	0.22408	0.493856	0.465285	0.415841	0.448282	0.437016
	256.246	0.696278	425.035	2787.42	1131.81	165.212	0.671146	415.78	2544.91	1094.64	0.364581	0.457512	0.475966	0.413839	0.491954	0.424051
	383.61	0.771388	401.371	2692.87	917.72	195.121	0.686766	417.491	2699.55	1099.88	0.259637	0.336222	0.541201	0.38898	0.469749	0.424795
	360.192	0.734685	425.095	2735.83	1030.81	83.9534	0.676935	459.177	2942.41	1207.13	0.189089	0.399156	0.516208	0.402136	0.457362	0.425633
test_2021_07_16_14_50	280.2	0.700738	372.773	2583.77	1023.06	63.3125	0.603819	394.445	3315.46	1241.95	0.192145	0.515022	0.47238	0.412337	0.443768	0.441936
test_2021_07_16_14_52	277.75	0.562276	463.14	2344.23	1282.29	48.75	0.449026	367.075	1962.3	1237.88	0.152808	0.989907	0.425445	0.440352	0.449092	0.45442
	426.553	0.778486	331.678	2066.69	712.531	68.8911	0.677499	384.683	2699.32	1067.45	0.139213	0.335342	0.586599	0.377128	0.475266	0.425154
	338.664	0.748313	337.919	2159.19	797.63	87.2867	0.678102	366.32	2576.56	1044.47	0.209641	0.383422	0.55831	0.38969	0.470497	0.422874
	375.67	0.719201	332.2	2268.48	878.393	132.9	0.711403	395.365	2660.24	1011.66	0.231061	0.402	0.525814	0.400867	0.505652	0.411556
	426.906	0.633931	342.39	2332.08	1067.33	77.2464	0.631491	435.887	2743.33	1214.82	0.150717	0.591661	0.453578	0.42766	0.447922	0.436251
	409.955	0.705039	425.523	2667.28	1083.95	74.045	0.628177	434.282	2717.7	1230.87	0.150939	0.476534	0.486652	0.410182	0.448353	0.436398
	405.467	0.672322	351.649	2309.64	992.193	76.7049	0.662062	423.645	2758.49	1164.73	0.151536	0.502881	0.490542	0.41724	0.454218	0.43086
	385.166	0.65942	456.782	2762.1	1231.97	73.4098	0.638531	466.702	2882.27	1277.15	0.164087	0.546975	0.446281	0.423347	0.445679	0.436291
	369.077	0.645752	383.213	2494.9	1127.32	53.0769	0.638892	373.268	2588.84	1134.3	0.131893	0.566081	0.452095	0.426227	0.436853	0.434708
	354.629	0.616676	384.058	2455.56	1168.06	82.131	0.642385	397.349	2560.13	1142.48	0.19009	0.611728	0.450713	0.432013	0.458798	0.436226
	468.554	0.657438	378.374	2522.88	1109.69	80.0601	0.636627	456.537	2872.8	1264.56	0.14486	0.553758	0.446301	0.424494	0.443449	0.438401
	473.898	0.61673	362.023	2453.55	1162.28	96.6017	0.619019	389.863	2570.37	1199.36	0.160947	0.63319	0.440599	0.433869	0.435174	0.442397
	401.791	0.674398	344.465	2304.62	975.759	80.5134	0.643686	395.831	2786.46	1193.05	0.163163	0.521497	0.483955	0.419075	0.430221	0.438827
	221.158	0.645339	352.553	2422.66	1075.18	58.9539	0.67846	293.8	2401.73	947.029	0.220531	0.537658	0.467649	0.427	0.468992	0.431852
	380.121	0.685946	379.67	2506.92	1042.99	79.5467	0.63383	352.262	3003.95	1156.52	0.178244	0.505076	0.469634	0.415113	0.4396	0.441658
	390.087	0.658259	394.606	2546.27	1123.89	74.8622	0.63036	361.419	2599.24	1165.2	0.163907	0.551873	0.444637	0.42411	0.433078	0.439929
	353.299	0.735653	373.2	2513.34	935.562	68.8824	0.666976	437.04	3667.93	1263.65	0.167597	0.404327	0.512114	0.400735	0.427468	0.430585
	343.47	0.707265	352.938	2260.24	908.747	70.5241	0.646247	355.044	2467.76	1077.84	0.179218	0.465138	0.517587	0.406842	0.460769	0.434712
	407.106	0.681547	365.364	2602.53	1071	65.5106	0.654947	455.923	3201.68	1301.57	0.137192	0.503253	0.455341	0.419881	0.422477	0.43198
	402.561	0.677918	418.447	2609.48	1107.06	66.5088	0.63611	388.761	2599.87	1170.47	0.142339	0.515296	0.466445	0.417226	0.458628	0.437504
	538.305	0.762057	360.921	2299.22	820.271	87.4753	0.604902	469.669	2912.8	1313.45	0.135873	0.406011	0.548261	0.389391	0.443638	0.442987
	414.421	0.679016	373.451	2524.21	1058.1	62.076	0.657504	512.766	3321.87	1297.5	0.130855	0.504064	0.476041	0.418693	0.457296	0.432325
	483.122	0.746155	386.053	2493.08	919.768	84.2439	0.614061	406.246	2753.18	1226.54	0.14648	0.425722	0.519317	0.397638	0.446244	0.438918
	427.588	0.72429	356.698	2424.37	922.87	73.7294	0.66088	403.447	4261.14	1213.9	0.144059	0.426101	0.499563	0.406593	0.464499	0.433108
	501.302	0.666873	385.992	2522.19	1093.85	104.436	0.626352	427.202	2812.86	1262.87	0.165226	0.544423	0.456629	0.421789	0.442773	0.438375
	337.74	0.694259	372.767	2600.73	1046.19	55.9932	0.654439	292.312	2389.66	998.245	0.143429	0.472513	0.465397	0.416316	0.458976	0.435885
	399.618	0.735965	362.059	2272.56	864.237	91.0645	0.650012	321.275	2468.55	1056.15	0.186859	0.411787	0.537286	0.396988	0.447462	0.438216
	440.34	0.736615	360.889	2280.14	865.708	100.26	0.648048	317.659	2516.22	1069.2	0.179411	0.41225	0.5331	0.397283	0.444758	0.436536
	471.604	0.688681	359.863	2442.44	1002.35	110.555	0.627669	357.976	2350.7	1078.92	0.173442	0.506231	0.481227	0.416236	0.460692	0.437425
	414.118	0.721241	373.724	2398.8	931.963	69.4292	0.646347	334.421	2435.29	1058.69	0.147958	0.440286	0.510883	0.403649	0.464385	0.438912
	463.973	0.693622	378.599	2400.63	994.197	102.8	0.624962	336.033	2366.59	1091.07	0.175282	0.498594	0.487067	0.414089	0.455485	0.438844
	465.138	0.6319	392.008	2455.81	1139.79	79.6034	0.635001	362.101	2525.22	1115.55	0.145742	0.595374	0.456149	0.42772	0.447838	0.438249
	458.49	0.678087	405.875	2595.19	1101.17	92.134	0.628165	346.288	2659.05	1112.32	0.163648	0.522624	0.463517	0.418542	0.451885	0.43787
	442.115	0.702977	363.863	2353.94	952.147	97.5562	0.650386	294.809	2286.15	973.668	0.162478	0.466957	0.502997	0.40898	0.4531	0.438095
	376.344	0.697538	368.075	2300.73	948.507	76.2158	0.69389	328.912	2309.93	910.965	0.169754	0.445015	0.509553	0.408922	0.501294	0.417969
	426.892	0.657778	401.223	2585.06	1138.95	88.6863	0.658294	343.885	2446.59	1030.33	0.167377	0.528444	0.447537	0.424223	0.461212	0.431527
test_2021_07_16_14_54	372.212	0.717241	384.376	2389.46	947.678	64.9728	0.629189	469.851	2994.58	1370.03	0.149433	0.461238	0.506762	0.405512	0.428217	0.436987
test_2021_07_16_14_56	366.966	0.681513	363.234	2347.5	986.511	63.3793	0.641539	580.643	3173.61	1423.39	0.148822	0.522092	0.491408	0.417154	0.434486	0.433503
	388.907	0.640883	381.13	2378.41	1093.38	67.4112	0.637187	441.026	2932.21	1291.31	0.147621	0.581372	0.465277	0.427053	0.440618	0.434401
	371.339	0.675777	361.441	2315.26	990.203	59.5085	0.625143	517.931	3068.47	1426.24	0.137568	0.533693	0.490402	0.41826	0.422978	0.438846
	318.529	0.748718	372.123	2271.51	846.08	62.5797	0.606365	475.88	2894.16	1369.81	0.167002	0.430487	0.550062	0.392502	0.43118	0.439204
	372.493	0.732526	377.543	2329.41	899.395	73.0714	0.660536	501.177	3035.36	1314.98	0.164236	0.415278	0.526467	0.40094	0.452837	0.430043
	419.924	0.695121	392.975	2529.07	1037.25	69.1304	0.59944	458.4	2735.05	1336.16	0.140907	0.522805	0.475565	0.414366	0.438947	0.443581
	363.85	0.676456	355.755	2275.2	971.017	80.8058	0.634451	348.814	2746.01	1184.87	0.185379	0.521587	0.494335	0.416184	0.42953	0.437965
	397.414	0.685943	396.791	2478.19	1049.61	65.5172	0.605931	485.511	2960.99	1411.72	0.140613	0.537554	0.487074	0.417345	0.414007	0.4413
	431.208	0.675022	397.442	2418.17	1048.99	83.9219	0.604852	426.861	2772.93	1317.05	0.160534	0.553023	0.481246	0.41943	0.42981	0.44212
	426.542	0.696104	358.012	2293.29	942.468	98.1718	0.635701	437.24	2687.59	1242.74	0.173543	0.490896	0.502648	0.412799	0.435151	0.439656
	324.753	0.717806	409.559	2496.72	987.965	56.5616	0.692364	448.048	2911.72	1174.66	0.160877	0.416176	0.510439	0.407377	0.45685	0.42349
	454.5	0.683938	395.293	2573.76	1077.94	78.1848	0.663775	459.088	2957.15	1282.13	0.147416	0.48198	0.46765	0.417854	0.436783	0.430145
	363.986	0.730123	386.6	2509.09	953.414	64.5676	0.632491	460.63	2880.53	1319.48	0.151475	0.433091	0.505652	0.402498	0.442405	0.437708
	393.261	0.7097	377.794	2498.41	988.584	75.3072	0.612987	417.893	2811.45	1320.35	0.158489	0.486404	0.495431	0.410713	0.431142	0.442575
	417.53	0.723717	340.373	2226.34	856.168	65.7917	0.662545	443.056	3119.87	1243.65	0.144251	0.428256	0.528196	0.402114	0.453391	0.428815
	391.789	0.711496	383.886	2550.93	1005.68	82.7763	0.675885	399.125	2830.68	1160.63	0.163509	0.430335	0.487071	0.412379	0.438294	0.429175
	301.33	0.721264	372.883	2453.74	949.131	65.5979	0.621506	349.221	2456.99	1097.3	0.183811	0.458624	0.512037	0.407435	0.468305	0.431633
	404.976	0.699427	376.2	2497.49	1009.68	83.376	0.644156	451.21	2850.79	1269.19	0.169103	0.4777	0.475584	0.414312	0.443557	0.433521
	387.072	0.773919	341.278	2320.46	786.861	66.7536	0.660638	376.857	2608.38	1104.41	0.153781	0.347582	0.565759	0.385683	0.450083	0.429809
	344.04	0.706224	372.655	2412.82	964.801	116.364	0.656622	436.785	2690.02	1182.07	0.221911	0.457826	0.501742	0.409892	0.468102	0.431306
	472.5	0.766383	361.811	2304.3	814.841	108.902	0.653155	424.835	2769.14	1205.42	0.177715	0.362455	0.554116	0.387509	0.449604	0.433264
	281.846	0.679379	340.408	2250.04	949.915	43.0769	0.665987	317.62	2605.47	1050.32	0.150119	0.490209	0.502681	0.414739	0.434203	0.439675
	449.509	0.68939	385.932	2528.76	1045.48	72.4914	0.635859	487.731	2967.44	1339.9	0.13716	0.503765	0.473757	0.416677	0.433685	0.43713
	460.562	0.687972	382.486	2480.35	1034.77	78.2628	0.654571	432.136	3301.25	1270.39	0.142562	0.483552	0.478502	0.417236	0.434278	0.432146
	442.57	0.659154	395.214	2502.25	1106.95	76.4615	0.612899	475.932	2922.06	1376.22	0.14689	0.576393	0.463243	0.424491	0.423463	0.440024
	430.225	0.781739	391.331	2414.18	827.122	71.2852	0.693395	438.675	2907.64	1171.01	0.143149	0.321564	0.567843	0.382131	0.471907	0.421106
	487	0.7642	356.542	2226.99	793.575	70.18	0.643722	430.637	2779.72	1229.55	0.127943	0.376211	0.564458	0.38744	0.44532	0.433175
	417.848	0.766694	362.432	2321.87	821.069	77.9501	0.645357	449.788	2853.14	1264.5	0.158691	0.370524	0.553654	0.385278	0.444211	0.433416
	394.01	0.719732	390.955	2512.17	996.023	155.942	0.705063	436.362	2632.32	1077.47	0.238864	0.401534	0.511343	0.402544	0.511114	0.417257
	440.634	0.734345	375.831	2427.21	914.361	76.6629	0.606338	400.83	2578.24	1239.96	0.143108	0.447883	0.514699	0.401917	0.440487	0.444751
	414.377	0.667165	368.362	2398.63	1037.28	77.4449	0.619229	435.736	2738.23	1291.07	0.159641	0.550353	0.474128	0.420317	0.44434	0.44152
	391.583	0.689584	406.549	2545.26	1064.02	82.5417	0.64541	482.73	3002.78	1309.25	0.166047	0.490545	0.479946	0.415698	0.443274	0.431478
	400.45	0.712542	372.382	2489.87	976.329	76.1074	0.622021	406.218	2800.62	1271.34	0.157968	0.477728	0.492687	0.409062	0.431126	0.438496
	434.515	0.669366	374.684	2459.28	1058.12	68.0354	0.636402	414.48	2776.13	1235.64	0.135861	0.529769	0.46803	0.421304	0.44891	0.435743
	396.984	0.633893	424.732	2768.21	1273.9	76.4239	0.642107	528.402	3189.29	1362.21	0.15923	0.587106	0.42331	0.42947	0.434499	0.434023
	414.492	0.689253	381.948	2461.76	1025.19	86.419	0.665732	327.085	2542.34	1047.69	0.16715	0.477219	0.479818	0.416674	0.448725	0.429878
	468.472	0.715017	381.904	2507.71	983.898	91.8113	0.609927	424.888	2567.14	1221.19	0.160141	0.479486	0.48836	0.409495	0.451184	0.440117
	401.312	0.690089	355.77	2431.52	993.117	70.8542	0.60434	492.687	2737.31	1348.45	0.149201	0.52471	0.480605	0.417558	0.429219	0.444472
	416.506	0.685666	389.696	2534.51	1056.38	76.1236	0.630958	401.507	2718.17	1232.87	0.153885	0.507031	0.477656	0.417531	0.450805	0.437904
	352.421	0.708019	394.141	2477.04	997.192	65.3571	0.644715	345.769	2531.59	1098.24	0.156645	0.463355	0.49862	0.409477	0.456435	0.432854
	395.306	0.742402	381.686	2397.54	897.21	88.9873	0.617591	387.493	2671.04	1213.81	0.17987	0.42632	0.52473	0.398189	0.446271	0.439649
	363.859	0.670922	406.697	2538.34	1100.98	64.7188	0.620351	366.31	2531.01	1156.06	0.152652	0.541491	0.459207	0.41941	0.466535	0.440089
	370.99	0.673962	375.157	2451.99	1046.05	82.4059	0.654862	420.734	3307.46	1249.49	0.177609	0.501934	0.47351	0.420671	0.45663	0.434491
	399.178	0.773363	358.533	2350.07	808.595	86.1705	0.656635	410.854	2598.32	1140.02	0.176982	0.348366	0.560254	0.383276	0.465945	0.431652
	329.142	0.695195	405.491	2628.37	1073.73	67.2925	0.612456	389.991	2685.43	1210.19	0.171142	0.509295	0.474285	0.415359	0.452003	0.440275
	301.105	0.758893	365.009	2476.35	864.681	70.1278	0.667677	460.511	2806.18	1214.97	0.196243	0.365347	0.532296	0.391948	0.468857	0.432821
	362.036	0.686941	386.616	2542.84	1055.93	72.3675	0.6271	429.668	2665.95	1222.3	0.164705	0.511131	0.474061	0.417907	0.450988	0.434539
	329.32	0.782923	353.028	2571.92	829.038	51	0.693247	445.664	3285.23	1265.13	0.131992	0.314264	0.544097	0.385039	0.437197	0.416855
test_2021_07_16_14_58	291.889	0.636276	399.802	2466.7	1130.98	46.4444	0.647942	434.444	3723.12	1465.54	0.139871	0.594863	0.467023	0.426988	0.409664	0.433706
test_2021_07_16_14_59	342.679	0.66511	444.589	2855.78	1249.04	63.5472	0.692429	618.078	3529.05	1453.31	0.154184	0.491601	0.442795	0.421753	0.430705	0.42279
	345.108	0.690186	444.394	2782.57	1161.83	82.2647	0.619131	567.682	3269.77	1568.5	0.184316	0.50677	0.458841	0.415367	0.41811	0.440738
	436.014	0.743586	361.555	2321.01	867.052	76.2443	0.651361	467.816	2972.27	1274.16	0.147934	0.405676	0.541143	0.394489	0.448036	0.430287
	334.8	0.733892	358.444	2354.76	889.862	68	0.656745	449.946	2809.5	1229.62	0.174727	0.414342	0.529622	0.398682	0.459777	0.429915
	377.532	0.698136	385.359	2516.91	1020.61	80.8865	0.643166	402.073	2710.31	1189.06	0.174806	0.477529	0.484798	0.413651	0.446958	0.434395
	397.809	0.639885	369.545	2432.05	1102.54	82.8168	0.616925	398.539	2790.98	1260.84	0.171078	0.600451	0.456908	0.426246	0.431984	0.440213
	346.274	0.655954	368.733	2482.15	1090.38	65.2547	0.650404	442.853	3017.14	1264.17	0.161798	0.541974	0.471157	0.425568	0.44281	0.428804
	399.395	0.739835	379.959	2471.72	920.416	75.2381	0.655764	387.139	2812.56	1175.23	0.157782	0.404824	0.51158	0.399414	0.444025	0.431839
	392.108	0.771431	357.221	2321.96	802.395	75.2877	0.63045	387.71	2794.48	1223.22	0.162649	0.373037	0.562692	0.384768	0.430148	0.436507
	387.15	0.701437	401.355	2640.6	1061.35	68.7778	0.667602	338.689	2771.76	1131.84	0.153572	0.451555	0.480433	0.412689	0.427991	0.435262
	395.84	0.666175	399.009	2557.88	1113.06	78.135	0.637252	430.232	2718.64	1224.51	0.167897	0.538911	0.467458	0.422019	0.452086	0.436399
	270.446	0.576863	400.779	2674.45	1351.65	78.0446	0.657212	451.762	2989.23	1274.43	0.223258	0.656925	0.3977	0.440626	0.439674	0.433855
	390.86	0.724181	392.89	2489.11	969.701	73.1517	0.672328	350.373	2741.38	1113.07	0.158028	0.414664	0.507148	0.404894	0.448751	0.431658
	360.352	0.727085	377.941	2455.41	937.596	92.4286	0.667006	400.245	2863.28	1195.91	0.197652	0.415237	0.509062	0.403242	0.446931	0.430564
	302.339	0.741006	397.736	2580.69	952.958	63.5402	0.641332	385.237	2574.9	1127.72	0.176498	0.41536	0.520172	0.398067	0.47398	0.430146
	424.544	0.691003	384.89	2459.11	1020.5	155.238	0.672802	473.147	2844.72	1205.07	0.259977	0.466918	0.487235	0.415166	0.470153	0.424089
	336.397	0.708042	364.522	2474.55	969.01	64.6379	0.622628	393.716	2500.41	1155.45	0.164935	0.488811	0.495963	0.407827	0.453691	0.437493
test_2021_07_16_15_01	263.467	0.664692	326.601	2349.72	994.142	83.337	0.621277	653.678	4199.72	1578.41	0.264202	0.565505	0.465624	0.422664	0.429929	0.443058
test_2021_07_16_15_03	399.476	0.681966	360.148	2405.99	1002.14	64.1786	0.632054	474.938	2920.47	1330.06	0.139864	0.515263	0.477012	0.416953	0.438125	0.438691
	416.263	0.665989	441.263	2709.12	1194.85	75.9072	0.664724	632.65	4750.11	1585.22	0.15198	0.515927	0.455968	0.422014	0.433544	0.429938
	317.304	0.679718	410.115	2633.95	1118.53	100.217	0.625635	591.936	3556.67	1518.82	0.240944	0.527971	0.467418	0.41967	0.426419	0.436176
	383.547	0.681673	359.655	2452.01	1014.24	59.3125	0.636498	367.582	2599.22	1155.04	0.135108	0.515963	0.474839	0.417908	0.456194	0.436975
	451.421	0.670303	379.959	2399.24	1037.66	78.2562	0.641693	461.996	2925.5	1315.62	0.145846	0.523152	0.46707	0.418819	0.427178	0.43567
	458.65	0.702948	353.764	2317.12	930.478	79.3064	0.628232	526.016	3099.61	1412.49	0.144112	0.490302	0.501081	0.410426	0.4374	0.438173
	382.08	0.703855	345.132	2324	926.89	64.0973	0.600232	454.084	2842.45	1344.47	0.144826	0.509423	0.504242	0.40972	0.445853	0.441428
	513.337	0.685001	358.421	2257.54	953.246	77.9526	0.626487	508.81	3108.44	1423.24	0.130076	0.514635	0.496649	0.415204	0.42501	0.43686
	449.738	0.676566	361.191	2431.86	1026.85	80.25	0.59789	506.959	2925.64	1428.91	0.150726	0.564969	0.463404	0.420571	0.427571	0.442168
	392.598	0.662648	352.375	2412.33	1041.41	81.265	0.627362	445.059	2781.25	1295.79	0.168077	0.551086	0.459692	0.422507	0.437968	0.436404
	279.455	0.679604	370.226	2551.31	1062.69	53.697	0.630163	342.881	2797.22	1228.14	0.167808	0.516382	0.464888	0.422515	0.418375	0.443494
	400.966	0.684518	357.579	2347.81	981.163	80.4958	0.637091	462.211	3086.86	1357.02	0.166796	0.504632	0.480158	0.416866	0.415756	0.437334
	440.609	0.677583	354.405	2299.51	976.194	70.0435	0.593864	461.068	3096.02	1448.43	0.137633	0.555732	0.478306	0.415892	0.415273	0.446347
	487.694	0.685402	335.334	2279.14	943.598	87.0561	0.633819	527.786	2849.49	1340.63	0.15157	0.513082	0.488812	0.415525	0.455167	0.436183
	398.511	0.714415	385.189	2463.25	976.857	60.8889	0.631604	465.883	3142.91	1390.5	0.137179	0.462933	0.503743	0.406865	0.422736	0.43587
	444.431	0.63773	364.321	2382.85	1091.79	79.4562	0.633939	418.57	2862.98	1287.13	0.154287	0.582154	0.460619	0.428296	0.43742	0.436294
	362.797	0.70015	330.601	2379.68	939.517	61.3516	0.655527	449.71	3443.38	1220.43	0.14576	0.474933	0.480604	0.413364	0.452368	0.432965
	391.871	0.681677	373.414	2341.91	997.214	84.297	0.649928	437.356	2791.18	1196.2	0.18618	0.508657	0.490469	0.415597	0.455866	0.433857
	494.93	0.640873	363.337	2404.47	1091.95	96.2196	0.627253	440.897	3234.31	1308.93	0.15871	0.58902	0.453009	0.428146	0.440148	0.438177
	449.97	0.657594	369.424	2449.4	1074.34	119.618	0.61988	434.168	2714.31	1274.15	0.202154	0.563965	0.456024	0.423171	0.434874	0.438245
	399.895	0.670879	354.671	2354.17	1003.78	76.1947	0.659983	502.859	3171.72	1350.64	0.15732	0.506256	0.484099	0.420531	0.430225	0.429679
	406.797	0.691322	353.018	2306.02	949.005	66.2464	0.637229	440.133	3057.52	1302.64	0.141589	0.501311	0.488322	0.414132	0.418631	0.436609
	412.344	0.692267	373.57	2474.39	1018.83	64.125	0.612078	515.521	3038.39	1484.27	0.134522	0.508893	0.475986	0.41725	0.422633	0.440638
	428.224	0.698219	366.083	2383.67	969.39	70.5306	0.626639	485.894	2846.08	1313.74	0.144679	0.495933	0.500994	0.413559	0.429534	0.438153
	431.425	0.688837	348.378	2404.46	981.477	82.7127	0.59892	500.971	2885.75	1370.79	0.160187	0.535076	0.476154	0.417213	0.440127	0.44416
	434.59	0.705813	395.436	2514.95	1014.74	74.7905	0.596752	498.938	2827.7	1383.61	0.146648	0.50472	0.481721	0.412626	0.433879	0.445651
	403.735	0.676317	380.338	2502.2	1057.99	63.0708	0.643936	515.254	3227.78	1336.52	0.135274	0.52316	0.473611	0.420246	0.434821	0.431368
	471.97	0.720934	359.093	2281.65	892.27	84.7872	0.63779	403.33	2536.01	1142.66	0.149451	0.452117	0.520671	0.402953	0.470673	0.433077
	441.271	0.710771	344.533	2225.19	884.144	66.5422	0.658015	418.569	2790.5	1176.57	0.127867	0.452195	0.519617	0.406928	0.477196	0.429397
	442.009	0.685522	354.538	2459.93	1008.05	66.0654	0.635535	440.443	2919.96	1296.01	0.128702	0.505405	0.475226	0.416857	0.436531	0.435511
	394	0.707576	364.911	2405.82	952.957	74.4727	0.64188	464.439	3015.05	1335.32	0.162798	0.463197	0.497348	0.409461	0.43243	0.434322
	425.512	0.741278	369.315	2397.33	886.183	71.7438	0.671099	420.975	2756.32	1138.66	0.144243	0.399543	0.514915	0.398369	0.472841	0.424847
	393.281	0.694442	391.747	2483.54	1022.81	118.053	0.625603	516.278	2999.56	1393.14	0.210394	0.499933	0.483626	0.414777	0.43574	0.438299
	434.71	0.710161	407.73	2513.14	1013.21	71.7849	0.62931	407.761	2777.61	1225.64	0.141635	0.473055	0.487688	0.410092	0.430959	0.439554
	361.831	0.704195	391.629	2434.24	991.038	64.4819	0.656837	444.034	2677.29	1157.05	0.155924	0.462745	0.496281	0.411706	0.45215	0.428932
	317.054	0.690291	353.63	2297.33	945.103	46.4054	0.647255	302.282	2699.9	1086.83	0.132247	0.500112	0.502562	0.41301	0.448394	0.434797
	403.381	0.68544	400.729	2528.2	1062.31	69.9762	0.594776	495.501	2591.65	1307.06	0.147543	0.540101	0.475177	0.415884	0.4524	0.443847
	387.632	0.700234	359.684	2460.74	985.314	103.504	0.660258	370.374	2491.72	1066.33	0.196598	0.465421	0.486888	0.41251	0.478993	0.42877
	379.587	0.725012	345.465	2373.23	899.774	62.873	0.63922	374.28	2503.22	1125.56	0.147351	0.434969	0.497309	0.405371	0.464336	0.435338
test_2021_07_30_11_27	337.266	0.715828	369.912	2237.9	891.236	85.1862	0.664139	507.596	3246.85	1369.14	0.216506	0.435331	0.526803	0.402658	0.435043	0.427646
test_2021_07_30_11_29	372.528	0.714681	339.123	2104.92	827.896	70.7925	0.69749	422.841	3112.24	1209.14	0.223843	0.414072	0.537459	0.399954	0.447974	0.421229
	344.059	0.698848	368.41	2166.6	905.608	85.1765	0.658919	540.318	3245.96	1437.59	0.202191	0.462955	0.524948	0.405336	0.430084	0.429539
	236.23	0.698412	362.455	2212.86	913.283	88.8649	0.635232	537.836	2793.87	1319.78	0.335337	0.485871	0.514781	0.407884	0.466161	0.433512
	368.889	0.706691	384.673	2226.91	925.232	86.6032	0.630439	551.267	3267.65	1504.59	0.19463	0.474926	0.534035	0.405177	0.420414	0.435721
	346.985	0.654716	402.953	2484.21	1106.8	88.345	0.647874	534.207	3155.12	1404.31	0.208284	0.544325	0.477825	0.423324	0.443976	0.433162
	318.725	0.661194	408.966	2429.29	1080.41	83.875	0.608547	452.488	2947.64	1410.07	0.212308	0.564243	0.478001	0.419425	0.428461	0.441315
	356.191	0.733948	398.12	2448.22	935.888	97.2304	0.637943	530.322	3009.24	1406.22	0.218976	0.426619	0.520702	0.398976	0.43973	0.433671
	396.429	0.668954	396.359	2398.45	1053.26	108.695	0.652741	557.081	3039.25	1387.8	0.219693	0.519563	0.486195	0.418084	0.444905	0.432359
	340.694	0.658199	423.145	2581.98	1150.49	95.2449	0.645147	503.966	3105.06	1400.64	0.230216	0.539265	0.465558	0.42257	0.426415	0.432149
	351.726	0.676475	407.994	2328.34	1023.97	94.7671	0.655281	511.587	3120.89	1393.93	0.218445	0.502576	0.502577	0.41398	0.431221	0.431331
	277.711	0.617309	401.88	2480.61	1187.77	107.463	0.641207	461.88	2875.42	1302.32	0.293946	0.603972	0.456273	0.430913	0.447194	0.432655
	348.077	0.755834	417.252	2479.16	906.143	103.385	0.599604	564.052	3017.25	1514.99	0.243749	0.417743	0.554527	0.389589	0.427265	0.443452
	360.876	0.695997	388.981	2301.52	964.041	96.719	0.649198	453.09	2893.11	1269.12	0.221234	0.484828	0.505791	0.408581	0.450878	0.429794
	367.486	0.772373	435.826	2649.97	934.995	94.9633	0.679307	565.105	3335.52	1405.66	0.213563	0.340189	0.543005	0.387754	0.451587	0.426801
	417.88	0.703463	398.327	2365.53	972.488	98.9448	0.678645	488.222	2896.95	1230.75	0.19617	0.443059	0.511776	0.408141	0.469931	0.423319
	296.077	0.757506	441.863	2697.64	985.452	75.5538	0.6332	513.944	2959.31	1372.43	0.210852	0.386642	0.529815	0.392749	0.460458	0.434388
	333.461	0.705212	411.301	2503.72	1019.04	111.719	0.624715	556.967	3203.8	1495.73	0.288713	0.483516	0.491175	0.409623	0.42819	0.439075
	322.925	0.768967	410.918	2391.38	865.675	105.944	0.666593	637.783	3114.63	1442.6	0.253542	0.351649	0.574308	0.384286	0.448577	0.43187
	299.243	0.706182	463.012	2717.1	1112.95	127.662	0.673435	588.598	2996.43	1330.22	0.292052	0.446747	0.487197	0.41004	0.490489	0.425115
	302.417	0.661686	503.128	2879.68	1295.91	64.6667	0.618548	488.183	3132.11	1468.3	0.18635	0.556285	0.454956	0.422457	0.418938	0.443157
	298.696	0.702069	392.706	2354.69	966.49	96.656	0.645952	515.674	2987.83	1345.63	0.248101	0.47583	0.518896	0.408535	0.447418	0.433982
	340.172	0.713861	407.984	2473.68	989.695	82.2069	0.661182	394.77	3295.31	1342.74	0.208587	0.441864	0.511768	0.406707	0.390795	0.429949
	333.469	0.764168	418.841	2448.53	889.321	88.4134	0.646281	490.727	3030.29	1369.92	0.219973	0.368841	0.55789	0.387391	0.443912	0.433422
	479.25	0.761218	416.197	2484.27	908.02	121.775	0.59066	406.587	2591.36	1297.57	0.197374	0.404424	0.541424	0.389011	0.445814	0.444061
	329.071	0.709209	379.432	2298.38	929.121	106.056	0.625464	468.239	2727.99	1290.74	0.252789	0.470841	0.516893	0.405551	0.458085	0.435709
	211.121	0.679465	312.303	2111.77	872.854	88.2121	0.671247	421.47	2939.55	1211.14	0.367777	0.485587	0.516877	0.413057	0.447961	0.422649
	453.822	0.786516	410.52	2249.28	801.169	94.0444	0.612985	475.43	2887.78	1383.35	0.174058	0.354004	0.595272	0.375623	0.442033	0.438122
	415.885	0.715472	402.808	2382.66	960.073	98.3607	0.618595	466.812	2800.86	1334.89	0.200153	0.472132	0.516046	0.406093	0.445216	0.438396
	360.167	0.729383	408.039	2394.59	938.122	97.5238	0.679798	446.739	3004.51	1238.04	0.228337	0.405153	0.52676	0.397105	0.454271	0.427422
	366.868	0.733346	394.376	2357.96	912.293	88.5824	0.631465	371.529	2554.13	1159.3	0.198442	0.424837	0.531891	0.398772	0.45454	0.434601
	279.662	0.721255	413.201	2446.21	972.705	92.2338	0.650103	526.972	3166.91	1399.43	0.25271	0.442533	0.524804	0.403675	0.433656	0.431548
	333.288	0.704395	375.597	2349.84	952.02	128.441	0.664215	451.711	2749.75	1197.46	0.262457	0.446966	0.520135	0.409436	0.460811	0.430878
	361.719	0.716895	411.8	2494.68	992.831	75.7416	0.658703	544.461	3073.92	1356.41	0.179586	0.439266	0.52081	0.404835	0.454034	0.429713
	308.294	0.726786	423.147	2476.59	975.545	87.6667	0.639406	507.874	3127.84	1417.66	0.235089	0.438141	0.529808	0.399387	0.43674	0.432108
	353.145	0.723895	383.799	2496.57	958.571	90.506	0.654948	526.081	3136.91	1388.38	0.213899	0.430246	0.514273	0.40413	0.437277	0.4286
	405.116	0.697144	405.431	2535.96	1049.02	90.1395	0.665493	507.075	3066.34	1306.86	0.191057	0.456999	0.498875	0.41359	0.454874	0.421988
	346.141	0.71222	401.416	2473.57	988.489	112.583	0.652936	487.854	2901.83	1306.72	0.257067	0.448412	0.504653	0.406985	0.457137	0.429868
	374.593	0.713041	421.005	2619.08	1039.73	66.1667	0.740734	535.055	3352.7	1139.76	0.158359	0.412656	0.503007	0.407874	0.524098	0.398268
	346.687	0.778236	382.054	2211.01	787.862	166.067	0.678108	521.956	2983.58	1282.87	0.306863	0.331346	0.595888	0.371451	0.471801	0.424067
	353.145	0.723895	383.799	2496.57	958.571	90.506	0.654948	526.081	3136.91	1388.38	0.213899	0.430246	0.514273	0.40413	0.437277	0.4286
test_2021_07_30_11_36	423.162	0.662246	374.772	2287.92	1015.67	90.7568	0.629315	542.146	3230.4	1494.21	0.173756	0.582801	0.501837	0.418654	0.435251	0.438166
test_2021_07_30_11_39	463.109	0.7136	428.488	2389.69	984.285	92.0156	0.645418	550.651	3087.35	1432.53	0.165215	0.4487	0.512852	0.406029	0.444941	0.433288
	482.145	0.637468	389.866	2435.02	1122.96	88.5636	0.62418	518.335	3000.02	1434.01	0.16072	0.586639	0.460303	0.426013	0.432078	0.437898
test_2021_07_16_14_50	430.159	0.692644	396.309	2323.14	984.842	88.5144	0.6711	470.463	3155.77	1279.46	0.173329	0.467015	0.51084	0.409416	0.459332	0.428524
test_2021_07_16_14_52	476.315	0.664122	440.898	2502.83	1127.46	108.671	0.610228	545.439	3290.13	1578.52	0.18429	0.563692	0.47624	0.421179	0.408873	0.439368
test_2021_07_30_11_36	425.688	0.703281	430.672	2441.86	1022.34	79.9583	0.649936	451.193	2965.75	1315.89	0.159082	0.46175	0.507859	0.409696	0.4418	0.430073
test_2021_07_30_11_39	475.582	0.699264	424.971	2502.39	1041.7	90.1233	0.63795	517.153	2952.21	1371.85	0.156825	0.477954	0.495851	0.411558	0.444553	0.434729
	478.519	0.660118	396.912	2347.42	1056.71	94.8689	0.59408	512.997	3035.28	1489.56	0.164042	0.593482	0.48848	0.418864	0.431363	0.443602
	382.351	0.694353	399.836	2313.32	979.595	89.6486	0.688233	455.689	3152.64	1283.17	0.189993	0.44774	0.515152	0.409847	0.443318	0.426146
	479.217	0.678371	388.647	2290.93	994.594	129.726	0.642684	517.96	2875.86	1330.48	0.202053	0.510188	0.498286	0.414879	0.463127	0.434651
	479.583	0.714489	416.811	2329.83	954.223	105.396	0.656533	503.68	3012.18	1344.97	0.179015	0.437276	0.516666	0.404229	0.446905	0.43412
	490.527	0.652871	436.977	2446.95	1130.24	88.4	0.623441	564.69	3029.72	1472.32	0.151761	0.566214	0.472306	0.423493	0.441113	0.436604
	399.325	0.693254	428.916	2556.81	1069.44	88.5556	0.650617	504.421	3148.81	1394.66	0.18468	0.478768	0.48371	0.413196	0.43453	0.430877
	494.853	0.685277	447.388	2532.11	1096.21	124.543	0.628483	534.844	3050.24	1448.31	0.198955	0.507211	0.486021	0.414664	0.435893	0.436419
	384.113	0.720399	395.255	2396.46	949.83	83.1613	0.650214	439.306	2963.34	1296.21	0.188859	0.439085	0.510473	0.40469	0.424423	0.432309
	483.91	0.711576	427.299	2469.83	1012.87	96.3846	0.645459	467.144	2888.65	1306.1	0.166324	0.455973	0.499627	0.409143	0.463927	0.434452
	488.381	0.667014	424.469	2467.08	1098.25	108.99	0.620512	488.067	2810.71	1336.35	0.180119	0.54761	0.472465	0.420641	0.452059	0.437237
	501.991	0.685944	417.107	2427.43	1040.1	96.1776	0.589748	478.971	2903.64	1444.52	0.16003	0.546649	0.490569	0.414264	0.430315	0.442419
	529.355	0.672047	448.97	2519.05	1121.2	103.579	0.622895	463.801	2973.46	1386.31	0.161998	0.538515	0.479453	0.417995	0.437641	0.438508
	410.217	0.650915	437.578	2462.26	1136.9	112.422	0.643133	463.579	2900.63	1304.46	0.211187	0.555046	0.472	0.42327	0.445273	0.433362
	377.307	0.698253	411.413	2510.19	1034.46	119.669	0.613067	557.25	3208.96	1550.52	0.24787	0.503118	0.494194	0.409962	0.417435	0.439157
	444.171	0.718841	420.91	2397.38	968.888	93.2412	0.680773	530.329	3205.54	1361.14	0.172731	0.419677	0.528343	0.403079	0.44793	0.424994
	450.17	0.705631	455.988	2617.48	1085.45	87.5446	0.671102	464.542	3057.82	1304.1	0.16131	0.44729	0.495727	0.409903	0.451769	0.426494
	494	0.674963	423.124	2361.09	1047.9	103.66	0.613577	546.977	2932.98	1444.67	0.172218	0.543321	0.499693	0.416807	0.445587	0.439951
	500.303	0.719276	405.884	2412.58	965.034	118.99	0.644053	500.205	2972.46	1350.07	0.187175	0.447052	0.517753	0.403321	0.443796	0.432423
	501.25	0.73099	423.93	2459.59	962.961	111.128	0.658593	475.657	2952.05	1299.31	0.181039	0.415022	0.523055	0.401484	0.450694	0.428489
	458.157	0.689408	440.633	2425.47	1052.13	88.7952	0.656089	467.523	2948.5	1300.29	0.163932	0.485381	0.50172	0.414092	0.453471	0.42927
	401.666	0.736792	402.207	2379.73	918.834	105.635	0.70179	449.286	2964.13	1176.22	0.211598	0.384925	0.543073	0.396503	0.471827	0.417455
	557.226	0.677404	416.972	2472.47	1079.23	124.887	0.651227	432.72	2918.78	1282.31	0.181069	0.50411	0.489597	0.416677	0.446283	0.429391
	603.011	0.754718	399.714	2228.15	847.375	141.63	0.71604	381.368	2611.03	1005.46	0.185063	0.352817	0.569208	0.38633	0.504249	0.406005
	497.175	0.71024	375.94	2222.61	910.065	113.12	0.670974	477.336	3043.96	1307.34	0.186056	0.436657	0.530339	0.403407	0.443813	0.427938
	447.524	0.730986	400.485	2389.6	929.678	116.122	0.668849	415.874	2878.46	1226.79	0.205461	0.40692	0.53071	0.399657	0.449936	0.4268
	492.77	0.696189	399.548	2326.47	980.451	120.914	0.635086	402.063	2785.87	1261.53	0.196342	0.484407	0.511712	0.410356	0.441425	0.438015
	539.021	0.635181	417.546	2390.14	1131.18	130.34	0.647207	417.795	2717.96	1217.65	0.190033	0.574639	0.468962	0.426303	0.45366	0.433296
	475.162	0.649554	414.876	2475.39	1126.51	101.669	0.62418	488.556	3048.07	1414.04	0.182876	0.570878	0.459395	0.423381	0.423096	0.440061
	472.633	0.712105	412.008	2398.01	979.647	113.495	0.633713	430.78	2823.99	1294.82	0.192458	0.460586	0.513623	0.405325	0.440892	0.435638
	496.288	0.728106	399.894	2349.78	926.046	114.92	0.664517	390.951	2713.53	1165.46	0.185761	0.423229	0.527072	0.40064	0.458683	0.424255
	444.42	0.70194	423.214	2494.1	1034.64	98.3185	0.649276	491.353	2957.81	1333.57	0.179263	0.469125	0.492711	0.409454	0.44556	0.433722
	543.81	0.711453	419.078	2361.89	974.805	127.699	0.630753	463.041	2792.02	1301.66	0.189653	0.466222	0.510788	0.406479	0.453318	0.436484
	480.937	0.730985	396.947	2293.13	901.83	94.003	0.665443	460.396	2892.59	1248.64	0.161301	0.411353	0.537895	0.398112	0.459541	0.427872
	512.994	0.701454	410.954	2359.12	985.564	119.641	0.653708	444.063	2846.25	1257.21	0.182726	0.461184	0.515225	0.409965	0.447703	0.432685
	553.5	0.710736	439.317	2479.35	1023.42	134.712	0.671761	409.505	2628.34	1121.7	0.193283	0.437409	0.511729	0.408157	0.484984	0.423906
test_2021_07_16_14_54	453.18	0.717213	423.125	2478.6	999.749	100.506	0.618577	451.391	2847.7	1336.12	0.184072	0.471023	0.517764	0.403921	0.441992	0.437779
test_2021_07_16_14_56	477.157	0.682821	417.252	2416.18	1049.33	112.219	0.65644	411.914	2872.42	1244.89	0.191098	0.487813	0.496864	0.413735	0.443243	0.431823
	421.827	0.671749	389.914	2403.73	1041.01	140.547	0.649969	469.789	2767.32	1257.52	0.266259	0.512741	0.484362	0.418201	0.468367	0.430652
	432.347	0.669223	435.334	2558.06	1130.63	89.198	0.660707	436.094	2733.49	1194	0.174954	0.507036	0.479804	0.419461	0.474353	0.42926
	437.202	0.737106	424.167	2402.99	940.285	105.939	0.619876	375.124	2797.7	1285.41	0.201961	0.427272	0.539646	0.397582	0.422122	0.44176
	458.142	0.708517	452.943	2613.95	1078.87	116.173	0.740925	470.63	2847.78	1069.57	0.205667	0.398766	0.498242	0.409856	0.522996	0.405255
	411.267	0.665533	447.799	2577.92	1147.91	86.8821	0.669592	462.944	2893.86	1219.84	0.17953	0.507872	0.472076	0.420782	0.462731	0.427561
	425.61	0.687012	416.46	2541.78	1074.91	96.122	0.672315	488.117	2973.1	1282.19	0.192079	0.474333	0.487305	0.416527	0.467514	0.425497
	294.119	0.657074	380.936	2492.73	1091.81	137.501	0.630874	371.118	2659.82	1198.51	0.341821	0.548888	0.470534	0.423194	0.448659	0.43752
	457.821	0.694788	436.868	2527.43	1067.03	89.7121	0.70859	426.97	2740.22	1071.06	0.1693	0.435855	0.493927	0.412544	0.504441	0.412591
	369.476	0.681537	396.626	2442.1	1035.71	98.1667	0.662396	391.227	2680.12	1138.5	0.216042	0.493103	0.494017	0.41449	0.475256	0.428556
	395	0.636026	468.111	2387.76	1153.44	82.2	0.626703	370.693	2453.27	1132.63	0.172447	0.587381	0.471744	0.426836	0.477391	0.435767
	486.65	0.726118	444.671	2627.38	1038.07	105.631	0.684438	488.903	2742.02	1177.71	0.176147	0.404738	0.504468	0.405899	0.500805	0.42286
	451.98	0.668025	422.193	2469.85	1093.2	95.1263	0.697666	448.887	2881.01	1162.84	0.175825	0.478456	0.478281	0.419647	0.474524	0.420204
	405.712	0.732816	404.79	2293.76	906.641	85.7308	0.653385	444.062	2618.55	1158.05	0.185805	0.42141	0.538513	0.3966	0.484028	0.425541
	436.833	0.704003	349.544	2080.06	856.774	78.6667	0.698521	408.493	3047.02	1205.36	0.159079	0.42624	0.533203	0.401589	0.412095	0.421816
	383.452	0.77774	405.805	2317.51	818.137	81.4384	0.694003	415.474	2738.19	1089.79	0.180231	0.329016	0.586664	0.378691	0.488639	0.418922
	592.614	0.807451	380.747	2100.48	710.279	93.1024	0.68175	441.526	2847.25	1181.75	0.134488	0.286825	0.626443	0.361129	0.483613	0.423164
	432.433	0.649108	467.96	2674.99	1232.34	78.6	0.659502	504.972	2999.35	1318.68	0.154759	0.541061	0.456595	0.424648	0.469131	0.42704
test_2021_07_30_11_42	405.172	0.706362	391.683	2427.41	984.403	108.859	0.616189	454.554	2770.71	1295.08	0.214104	0.489791	0.506731	0.409823	0.441506	0.437546
test_2021_07_30_11_44	425.696	0.669713	421.626	2423.53	1075.79	110.657	0.63063	388.339	2726.94	1223.22	0.207164	0.535329	0.489565	0.417668	0.444186	0.438417
	367.293	0.6684	457.42	2691.59	1190.05	92.3362	0.604624	434.59	2776.64	1331.97	0.20651	0.561049	0.459707	0.420136	0.424643	0.442408
	402.313	0.659046	414.495	2328.42	1061.73	117.301	0.625441	449.35	2724.02	1265.98	0.22936	0.558962	0.492736	0.419151	0.430556	0.438787
	339.146	0.638489	414.085	2527.5	1168.35	141.135	0.61833	331.832	2433.65	1124.82	0.29913	0.591719	0.458762	0.426581	0.455573	0.441628
	431.298	0.657765	432.433	2511.37	1139.52	105.511	0.639037	389.989	2932.95	1151.42	0.201261	0.550233	0.478341	0.422817	0.443689	0.441591
	389.228	0.679342	422.517	2503.24	1091.95	201.464	0.614264	407.928	2541.87	1217.19	0.32133	0.543512	0.49301	0.416521	0.453781	0.438392
	484.859	0.692194	397.262	2444.38	1023	100.198	0.64623	406.91	2787.47	1222.43	0.170318	0.48241	0.498658	0.4131	0.446255	0.433545
	468.256	0.713578	387.326	2412.93	962.624	99.2111	0.641269	357.02	2498.32	1102.55	0.173121	0.453573	0.513052	0.407828	0.463526	0.435044
	477.333	0.680436	409.139	2519.34	1081.3	113.553	0.611976	430.947	2679.17	1287.36	0.189604	0.527575	0.482065	0.41688	0.434638	0.442955
	475.286	0.675069	414.368	2465.2	1075.97	121.84	0.640549	408.068	3309.76	1281.54	0.202183	0.516943	0.484323	0.417131	0.427962	0.437109
	483.511	0.670153	420.854	2488.78	1098.76	119.993	0.618043	405.394	2755.6	1281.54	0.197374	0.539668	0.479094	0.419484	0.42507	0.442903
	473.484	0.670894	414.278	2510.75	1101.14	99.0581	0.630773	402.638	2715.98	1236.29	0.172599	0.531929	0.480801	0.41974	0.438396	0.438123
	437.474	0.699344	414.796	2552.28	1054.44	96.0889	0.610552	381.028	2720.8	1271.75	0.179866	0.498354	0.498136	0.413252	0.427315	0.443866
	427.398	0.668662	398.592	2476.04	1082.64	103.558	0.644566	340.182	2651.05	1153.69	0.194992	0.524995	0.479046	0.419539	0.432249	0.438472
	423.424	0.688309	404.22	2424.05	1030.05	97.4958	0.622988	468.908	2780.4	1313.74	0.188057	0.510603	0.499253	0.413265	0.438216	0.438194
	442.022	0.685784	409.034	2416.03	1034.31	114.888	0.586801	370.351	2576.25	1264.66	0.206724	0.546088	0.500323	0.414574	0.425525	0.448756
	496.928	0.710842	417.194	2427.44	991.361	114.874	0.636031	400.037	2582.83	1166.96	0.184207	0.46428	0.51134	0.407224	0.458365	0.436732
	420.49	0.688597	415.081	2404.72	1032.05	89.48	0.671239	394.282	2732.4	1136.37	0.174691	0.477468	0.512819	0.415119	0.443766	0.426242
	433.992	0.714974	389.388	2415.76	966.977	87.3821	0.659594	378.047	2641.46	1125.26	0.164088	0.438082	0.517556	0.406285	0.461244	0.433237
test_2021_07_30_11_42	489.461	0.698888	414.838	2547.69	1053.49	111.798	0.652619	402.24	2837.08	1228.67	0.182588	0.469295	0.489499	0.412953	0.436072	0.435826
test_2021_07_30_11_44	485.886	0.708514	415.621	2444.95	1004.01	108.861	0.655805	405.703	2710.19	1184.65	0.17873	0.448816	0.510996	0.40809	0.447265	0.434701
	466.732	0.689453	409.703	2482.66	1049.58	112.047	0.643353	350.63	2544.26	1115.16	0.189531	0.489491	0.496101	0.415272	0.452303	0.434793
	410.941	0.666546	428.903	2575.16	1138.6	92.4902	0.591336	331.002	2472.12	1185.03	0.187361	0.577387	0.47173	0.421335	0.430464	0.448171
	400.605	0.683295	391.788	2436.79	1033.6	108.279	0.628927	292.278	2525.99	1100.78	0.208634	0.517951	0.486319	0.415382	0.434083	0.441337
	436.991	0.651207	383.492	2508.83	1118.37	118.043	0.638766	356.722	2393.86	1071	0.208656	0.567806	0.466557	0.424891	0.469567	0.431233
	443.181	0.694131	430.038	2739.2	1130.36	92.0667	0.648278	372.904	2779.11	1197.33	0.172857	0.479015	0.468716	0.414264	0.435904	0.435743
	368.612	0.687965	401.349	2567.37	1070.51	221.63	0.643006	348.923	2545.3	1111.57	0.317712	0.491175	0.481491	0.415145	0.456272	0.436887
	465.267	0.688084	419.58	2540.94	1075.6	95.4158	0.669939	447.049	2793.02	1188.26	0.167157	0.473695	0.483817	0.414896	0.463636	0.425942
	447.355	0.68949	409.014	2556.64	1070.86	101.08	0.679602	401.61	2811.35	1151.17	0.182652	0.463667	0.486123	0.415595	0.450747	0.427388
	479.51	0.689885	398.458	2384.1	1011.11	105.102	0.640598	500.194	2879.54	1330.44	0.181598	0.492297	0.499722	0.411915	0.435085	0.437589
test_2021_07_30_11_47	498.694	0.739976	370.574	2193.3	834.35	95.1122	0.720282	490.517	3186.25	1217.01	0.157534	0.367995	0.557329	0.392466	0.472874	0.413369
test_2021_07_30_11_49	422.867	0.66245	432.04	2517.2	1126.77	91.2656	0.584823	493.443	2765.02	1403.68	0.18003	0.600142	0.467782	0.420469	0.442652	0.443774
	479.078	0.712179	380.044	2275.99	920.987	121.851	0.657584	480.997	2956.66	1307.99	0.199199	0.4447	0.526849	0.404352	0.452085	0.430224
	457.595	0.689057	364.806	2326.94	964.772	90.8198	0.612468	450.256	2857.7	1368.1	0.179582	0.514218	0.49169	0.412358	0.433413	0.441578
	506.174	0.700493	406.024	2544.2	1042.11	96.5	0.661287	469.996	2887.35	1261.27	0.158682	0.470663	0.498457	0.412372	0.455118	0.428266
	471.378	0.65559	417.148	2520.07	1130.71	97.3667	0.60961	520.288	2997.76	1462.54	0.171249	0.577321	0.471532	0.421559	0.428716	0.441436
	434.019	0.662034	368.946	2327.1	1022.56	101.425	0.602781	465.978	3054.47	1480.32	0.196642	0.570901	0.488404	0.419102	0.413206	0.442766
	592.245	0.716015	395.386	2333.4	945.678	106.447	0.649552	465.441	2846.73	1284.32	0.151573	0.441629	0.525357	0.405247	0.454769	0.433131
	570.101	0.722414	361.79	2267.93	891.84	135.15	0.669812	421.921	2839.64	1204.32	0.186948	0.423491	0.538355	0.400343	0.459008	0.426303
	462.245	0.676771	404.386	2479.6	1070.68	121.91	0.634158	527.368	2859.35	1360.85	0.219359	0.527272	0.486721	0.416465	0.463652	0.435528
	517.783	0.721219	398.728	2344.33	939.582	99.8882	0.674763	486.781	2981.45	1278.39	0.160884	0.418987	0.530315	0.401756	0.462502	0.426034
	454.714	0.684387	376.856	2332.47	988.239	113.445	0.58738	436.188	2871.55	1432.28	0.199648	0.546754	0.501363	0.41354	0.408401	0.444814
	464.021	0.683232	404.278	2550.4	1077.84	105.443	0.66406	504.913	3143.83	1343.71	0.182746	0.483788	0.477596	0.417274	0.443178	0.429379
	529.765	0.697674	390.383	2382.83	986.664	105.529	0.599792	547.232	3078.52	1520.59	0.164281	0.517139	0.504305	0.411007	0.42673	0.442766
	506.467	0.676014	414.921	2514.61	1091.44	103.848	0.685071	466.4	2985.22	1250.25	0.165823	0.476827	0.487536	0.41963	0.458532	0.42246
	530.98	0.688799	379.788	2377.77	994.551	110.877	0.642781	515.746	3094.67	1417.53	0.171017	0.492221	0.498606	0.414012	0.428969	0.433607
	459.594	0.665105	337.338	2197.78	958.283	206.444	0.689869	369.158	2541.85	1043.86	0.313282	0.491782	0.503327	0.417444	0.4922	0.421109
	534.468	0.679621	420.746	2461.75	1069.57	105.242	0.609839	451.833	2938.32	1393.46	0.166302	0.534765	0.483442	0.416538	0.429376	0.438613
	614.699	0.709745	464.208	2632.71	1088.14	115.765	0.652501	517.59	3028.49	1371.61	0.152032	0.448171	0.489918	0.41013	0.448948	0.432429
test_2021_07_16_15_01	427.541	0.692046	382.306	2361.24	989.764	134.535	0.667815	462.768	2912.66	1262.3	0.234781	0.467374	0.499783	0.412208	0.454787	0.429645
test_2021_07_16_15_03	517.422	0.667988	360.881	2395.06	1032.94	127.895	0.628516	419.379	2749.05	1276.77	0.197062	0.536386	0.478218	0.420554	0.438768	0.43702
test_2021_07_30_11_47	518.134	0.657446	432.197	2573.21	1159.03	102.408	0.664185	450.24	3028.85	1284.66	0.16561	0.525487	0.472047	0.422739	0.449104	0.426881
test_2021_07_30_11_49	495.487	0.699001	381.623	2469.8	1006.89	114.406	0.642007	466.794	2976.05	1339.66	0.183204	0.479868	0.477026	0.411827	0.431191	0.431475
	458.679	0.688561	314.245	2184.59	904.547	233.072	0.701828	365.726	2628.48	1051.98	0.313845	0.454114	0.50284	0.413085	0.494147	0.415378
	478.917	0.681155	380.196	2431.85	1029.42	95.5556	0.616877	469.971	2912.59	1391.29	0.165602	0.521429	0.485412	0.416973	0.434879	0.440619
	527.189	0.60314	401.583	2451.71	1208.77	106.541	0.682696	375.43	2732.76	1108.78	0.167244	0.594184	0.447256	0.434212	0.477364	0.4212
	510.547	0.692331	376.739	2413.18	998.358	116.997	0.644206	452.082	2781.22	1261.25	0.179416	0.48704	0.496271	0.413741	0.454774	0.433815
	508.219	0.62871	381.997	2435.37	1138.96	109.247	0.659392	418.474	2810.6	1220.54	0.180873	0.569216	0.458088	0.430016	0.459085	0.431979
	538.84	0.672491	420.131	2506.42	1094.93	93.9574	0.6247	422.949	2700.59	1267.77	0.148247	0.527875	0.475142	0.418042	0.460482	0.438661
	549.097	0.654185	384.719	2468.33	1102.64	104.602	0.638145	455.967	2938.81	1335.46	0.157077	0.545762	0.46972	0.423553	0.444598	0.435512
	437.535	0.69832	388.106	2386.11	985.381	104.727	0.679504	363.966	2793.72	1121.65	0.196145	0.450025	0.51512	0.412448	0.459548	0.425995
	534.776	0.669652	397.175	2380.9	1047.61	93.9605	0.670226	442.697	3003.22	1265.93	0.149468	0.496273	0.484008	0.418283	0.456587	0.427485
	516.939	0.737434	380.243	2339.76	891.68	116.069	0.608289	414.923	2926.65	1336.97	0.181544	0.441194	0.539542	0.399121	0.423638	0.442681
	457.396	0.696105	389.279	2457.86	1015.53	189.187	0.650579	395.05	2623.37	1160.04	0.273563	0.474596	0.496763	0.411611	0.468977	0.430534
	460.267	0.752982	372.818	2226.86	830.079	93.175	0.721894	485.984	2894.44	1138.6	0.165487	0.347566	0.573864	0.388451	0.498751	0.414299
	459.359	0.733344	401.364	2394.43	928.18	82.9709	0.684215	447.743	2946.89	1206.1	0.154476	0.39664	0.530236	0.402035	0.466295	0.425321
	524.739	0.725313	387.431	2326.27	916.007	170.255	0.664746	452.263	2838.09	1233.52	0.218842	0.417329	0.5347	0.401022	0.465065	0.429359
	494.09	0.70309	383.589	2301.47	946.729	98.9615	0.667512	498.337	2779.09	1235.07	0.166492	0.452378	0.517385	0.407748	0.474109	0.427765
	583.962	0.756911	382.242	2293.74	845.05	121.962	0.629729	476.618	2887.25	1349.38	0.164883	0.389533	0.553712	0.388922	0.438786	0.436519
	469.472	0.697889	413.817	2471.09	1030.01	99.5677	0.649255	471.334	2936.59	1304.5	0.18237	0.472095	0.496292	0.411265	0.450475	0.431863
	488.509	0.704525	403.538	2437.12	997.487	93.0179	0.682874	428.981	2856.25	1167.11	0.161031	0.441739	0.502672	0.409651	0.467276	0.422087
	523.458	0.714262	400.97	2437.51	978.426	97.9162	0.628926	400.729	2785.28	1258.6	0.157123	0.460914	0.509968	0.407029	0.440245	0.4364
	481.973	0.681202	379.042	2430.22	1028.04	95.6099	0.613885	472.176	2895.12	1394.21	0.164929	0.524093	0.485653	0.416961	0.435979	0.441276
test_2021_07_30_11_51	478.145	0.725733	399.948	2314.05	919.117	94.9091	0.656895	600.601	3424.66	1539.69	0.169522	0.421066	0.530737	0.401287	0.427776	0.430396
test_2021_07_30_11_54	454.24	0.716279	374.089	2420.21	946.229	126.026	0.652525	479.156	2996.7	1344.93	0.203597	0.443449	0.507916	0.405876	0.444577	0.428205
	466.775	0.643521	409.244	2435.74	1125.39	99.6923	0.637962	404.534	2866.63	1275.69	0.176766	0.565751	0.474177	0.425081	0.441749	0.435577
	575.378	0.656691	424.921	2544.62	1149.21	237.628	0.641127	435.656	2758.55	1257.7	0.278198	0.539371	0.472585	0.423375	0.450689	0.433952
	529.45	0.653867	445.212	2451.17	1127.02	122.58	0.62827	468.553	2899.96	1338.72	0.18216	0.55914	0.478842	0.421887	0.445546	0.438664
	460.507	0.688115	394.752	2310.97	986.508	99.0072	0.605508	471.036	2875.43	1383.34	0.182544	0.536729	0.50659	0.410767	0.432464	0.441842
	586	0.696796	389.443	2301.92	966.033	92.4052	0.638459	483.205	3176.22	1423.54	0.136185	0.482998	0.51784	0.410097	0.418256	0.435474
	588.712	0.684105	380.192	2378.29	1007.89	92.9153	0.626242	337.652	2717.24	1209.93	0.136008	0.508117	0.502427	0.414406	0.427898	0.443879
	541.174	0.697573	397.157	2325.83	975.764	105.88	0.649565	482.471	2854.9	1294.99	0.163049	0.47081	0.509059	0.41072	0.442214	0.433097
	522.833	0.679517	384.912	2256.91	983.631	81.8485	0.623593	424.59	2937.84	1345.34	0.136505	0.517347	0.512987	0.41448	0.420637	0.437501
	551.624	0.741326	391.015	2253.19	871.005	92.265	0.617902	435.479	2864.95	1332.45	0.14357	0.423146	0.560638	0.390492	0.437488	0.439361
	480.295	0.734884	373.424	2199.37	854.779	107.692	0.612751	455.901	2902.89	1376.34	0.19454	0.439674	0.553022	0.394024	0.431819	0.438948
	527.493	0.695312	361.405	2227.08	925.662	152.493	0.672043	468.095	2858.25	1239.27	0.2099	0.457111	0.511779	0.409049	0.471084	0.427903
	528.329	0.714241	369.571	2143.91	872.704	135.716	0.645088	472.85	2878.47	1300.22	0.200597	0.45439	0.540333	0.399797	0.444779	0.432505
	610.898	0.702135	400.318	2356.31	980.286	105.808	0.626143	448.551	2828.29	1307.48	0.145086	0.48506	0.512138	0.408871	0.439289	0.434071
	553.037	0.718783	384.021	2292.71	920.996	119.386	0.646079	443.893	2962.62	1315.13	0.170149	0.447121	0.53229	0.401713	0.438242	0.431651
	550.431	0.722845	373.471	2381.68	929.773	89.7077	0.626666	441.984	2837.57	1297.48	0.142053	0.46136	0.519343	0.405036	0.442216	0.43715
	512.026	0.689959	379.203	2269.33	959.115	92.0974	0.63336	440.769	2924.03	1319.2	0.161244	0.498631	0.513284	0.410633	0.432103	0.436858
	566.542	0.686441	376.442	2277.25	968.689	88.2083	0.652755	441.096	2792.88	1228.09	0.135232	0.488822	0.506759	0.412746	0.451049	0.432104
	579.619	0.671536	396.259	2441.84	1062.82	118.655	0.655957	449.347	2867.58	1263.35	0.165202	0.508164	0.48464	0.419625	0.4539	0.428981
	581.991	0.684863	380.968	2395.56	1011.94	108.532	0.639943	429.462	2821.1	1267.22	0.15527	0.499007	0.495069	0.415522	0.4507	0.434323
test_2021_07_30_11_51	513.617	0.712827	390.228	2357.84	954.223	108.174	0.696288	429.919	2715.19	1111.37	0.174242	0.421186	0.521834	0.403718	0.491507	0.418951
test_2021_07_30_11_54	435.055	0.660086	389.454	2387.92	1063.96	103.867	0.620595	378.579	2646.16	1214.37	0.196078	0.566624	0.477364	0.419523	0.451189	0.439095
	456.66	0.68767	427.905	2675.41	1125.15	97.55	0.617611	431.156	2984.41	1387.34	0.180009	0.514768	0.475732	0.416153	0.41043	0.441077
	535.702	0.689093	418.8	2599.86	1093.13	86.807	0.666029	525.716	3146.29	1379.03	0.140616	0.474738	0.490129	0.416901	0.442233	0.428158
	554.143	0.68194	412.368	2436.59	1050.04	86.9481	0.672597	509.241	2877.38	1261.35	0.138281	0.477919	0.494834	0.41611	0.468532	0.424632
	471.873	0.659369	413.953	2429.21	1098.67	116.946	0.664577	418.817	2873.57	1213.78	0.196228	0.52138	0.479999	0.421726	0.450243	0.430081
	472.473	0.721168	415.237	2472.36	981.185	92.7171	0.735737	477.225	2889.14	1096.12	0.161976	0.383545	0.518899	0.404368	0.509439	0.409483
	519.587	0.678225	436.675	2536.36	1105.39	112.159	0.684735	484.136	2969.74	1243.85	0.175835	0.479138	0.488051	0.418443	0.467418	0.424137
	502.876	0.685396	435.097	2584.47	1105.47	100.746	0.65655	422.475	2922.98	1261.65	0.166234	0.484515	0.479571	0.416499	0.4357	0.43093
	359.208	0.704002	369.329	2407.24	966.591	161.308	0.680313	378.569	2429.95	1012.9	0.31371	0.438519	0.503985	0.410485	0.512491	0.418993
	465.934	0.687823	426.788	2553.51	1088.64	87.0487	0.661903	480.925	3089.13	1294.8	0.159158	0.480571	0.488769	0.414346	0.458728	0.429029
	364.463	0.666621	441.813	2673.71	1170.31	80.1789	0.666778	396.787	2527.92	1086.06	0.18339	0.515135	0.472598	0.419632	0.499171	0.425896
	459.342	0.658226	422.7	2464.15	1113.84	73.2632	0.68791	339.684	2766.34	1076.82	0.13773	0.502938	0.47587	0.422141	0.441098	0.422795
	401.375	0.694382	414.828	2461.27	1037.14	83.25	0.665346	376.438	2837.64	1196.69	0.175124	0.46334	0.50221	0.413212	0.458145	0.430202
	487.52	0.715463	400.407	2406.24	973.424	87.3562	0.669294	433.35	2876.24	1212.68	0.152934	0.431566	0.528758	0.401855	0.459851	0.427069
	526.815	0.713648	367.509	2131.76	868.801	133.387	0.642899	471.309	2866.1	1298.06	0.198058	0.457638	0.541537	0.399687	0.444815	0.432815
	621.625	0.696704	396.786	2344.07	984.268	108.406	0.623136	457.815	2814.09	1309.77	0.145994	0.498269	0.509181	0.410298	0.441855	0.434841
	546.95	0.726735	385.068	2288.57	905.734	113.941	0.658513	444.029	2960.03	1286.03	0.168159	0.42247	0.53901	0.398705	0.443946	0.429053
	481.819	0.752328	378.478	2304.02	849.289	134.431	0.690127	431.863	2849.85	1161.07	0.201871	0.363468	0.544984	0.39112	0.464049	0.422554
	605.43	0.678556	381.324	2335.42	1005.87	141.814	0.604117	481.094	3111.8	1475.83	0.175792	0.552295	0.496117	0.417323	0.41508	0.441032
	496.968	0.67629	390.852	2341.46	1012.5	88.7742	0.60695	334.116	2801.74	1278.96	0.177536	0.54604	0.503126	0.415501	0.409336	0.444537
	446.714	0.687027	377.22	2272.71	968.019	74.9762	0.69774	455.796	3048.6	1193.78	0.144482	0.457228	0.510038	0.414149	0.46239	0.417198
	580.926	0.674688	384.067	2357.52	1023.27	109.415	0.65162	428.287	2837.48	1249.13	0.15552	0.50352	0.491668	0.417361	0.449895	0.43283
	585.525	0.672433	395.312	2444.37	1060.95	120.336	0.651273	454.485	2846.22	1271.82	0.165106	0.510497	0.485827	0.419454	0.455499	0.429927
	491.821	0.71421	367.554	2268.38	905.638	93.3582	0.627694	486.444	2922.39	1363.35	0.159268	0.463198	0.52489	0.403475	0.438352	0.438104
	556.48	0.691992	378.891	2346.31	979.735	97.8724	0.638644	430.611	2806.76	1260.41	0.149995	0.490144	0.504385	0.412405	0.449735	0.43397
	481.033	0.675713	387.811	2391.4	1032.29	103.533	0.661796	385.321	2653.18	1129.48	0.182388	0.512172	0.488034	0.415717	0.480072	0.426522
	454.97	0.687659	426.997	2667.52	1122.12	97.802	0.618399	430.137	2982.3	1384.18	0.181204	0.514123	0.476441	0.416017	0.41092	0.440933
	503.357	0.681651	396.535	2628.92	1102.61	88.3571	0.652989	455.532	3095.65	1351.67	0.152382	0.491243	0.483832	0.419711	0.421159	0.430328
	554.495	0.687567	420.39	2476.37	1056.85	85.8476	0.678454	538.565	2999.76	1302.1	0.135498	0.468083	0.496256	0.415107	0.46861	0.424273
	473.567	0.659398	415.521	2428.32	1099.19	115.08	0.663549	417.214	2870.47	1213.7	0.193464	0.522238	0.480294	0.421709	0.450256	0.430076
	475.153	0.71961	415.978	2467.63	983.709	92.4884	0.731803	474.665	2882.76	1101.9	0.16126	0.38802	0.518297	0.404798	0.505683	0.410407
	515.922	0.676404	432.765	2534.14	1106.69	110.355	0.690164	481.868	3015.38	1238.56	0.174006	0.478204	0.486736	0.419055	0.466522	0.422652
	506.149	0.683664	431.662	2576.73	1105.21	101.888	0.657446	421.826	2925.99	1260.36	0.166931	0.487022	0.478836	0.416965	0.43547	0.431163
	469.893	0.699236	423.188	2520.56	1052.6	83.5725	0.671322	488.864	3226.41	1298.18	0.153922	0.456376	0.498998	0.410827	0.451549	0.425685
	361.159	0.703692	370.32	2413.71	969.014	161.508	0.677066	379.288	2417.93	1019.47	0.311816	0.440553	0.503337	0.41048	0.510263	0.420158
	356.375	0.66991	442.619	2695.99	1170.81	80.7614	0.667587	399.906	2527.2	1084.29	0.187279	0.51052	0.472611	0.418758	0.500627	0.4252
	455.413	0.662029	431.325	2491.81	1120.63	74.1087	0.689138	365.108	2878.7	1123.17	0.140279	0.496395	0.476496	0.421565	0.44009	0.422121
	462.625	0.637342	436.672	2530.02	1193.82	76.3125	0.673716	401.726	2576.35	1076.5	0.143279	0.546647	0.475675	0.428493	0.46762	0.422445
	401.649	0.69411	416.208	2464.6	1039.76	83.6842	0.663823	377.037	2829.17	1197.66	0.175287	0.465036	0.501512	0.413357	0.459231	0.430526

## Sheet: 50mM
Unnamed: 0	NADH.Intensity	NADH.a1	NADH.t1	NADH.t2	NADH.FLIM	FAD.Intensity	FAD.a1	FAD.t1	FAD.t2	FAD.FLIM	Redox.Ratio	FLIRR	NADH.G	NADH.S	FAD.G	FAD.S
test_2021_07_11_15_49	258.516	0.506948	420.398	2456.89	1411.66	48.2151	0.621704	564.455	3149.85	1440.07	0.154771	0.823455	0.431204	0.452465	0.42433	0.445131
test_2021_07_11_15_51	384.154	0.694446	383.193	2427.03	998.195	49.5018	0.607325	575.774	3160.33	1527.43	0.111614	0.527196	0.500342	0.411814	0.408468	0.443637
	309.628	0.746535	400.813	2471.26	924.57	31.9183	0.630948	630.082	3413.75	1537.07	0.0929064	0.414558	0.53502	0.392916	0.402432	0.44552
	295.663	0.69956	386.34	2409.85	987.634	35.8478	0.616142	591.525	3307.66	1535.96	0.106665	0.505368	0.515906	0.409175	0.399329	0.446187
	323.225	0.699102	378.086	2484.5	1004.8	39.0732	0.616027	467.329	3067.61	1386.55	0.108066	0.512076	0.496403	0.411638	0.408637	0.443782
	397.374	0.75396	402.402	2403.39	885.002	43.9116	0.642866	577.227	3233.28	1440.29	0.0965678	0.394707	0.535647	0.392995	0.426626	0.437848
	356.043	0.782783	411.613	2562.31	869.662	31.1382	0.619243	592.566	3257.63	1496.9	0.0801974	0.362345	0.548683	0.38298	0.409105	0.445888
	396.548	0.673718	340.641	2347.83	993.486	55.1605	0.63427	375.464	3030.83	1233.23	0.123522	0.527763	0.483386	0.418064	0.417843	0.443278
	379.74	0.675097	385.868	2483.77	1059.84	52.7637	0.621539	491.962	3200.15	1388.52	0.114397	0.538713	0.482201	0.418957	0.408831	0.442834
	404.777	0.699744	357.703	2364.93	960.298	53.5358	0.613655	487.154	2918.09	1358.04	0.114	0.50481	0.507523	0.408347	0.414829	0.446579
	345.03	0.638419	378.57	2620.12	1183.54	41.4525	0.638222	489.486	3068.92	1337.75	0.105714	0.588795	0.451228	0.428157	0.421955	0.441053
	354.897	0.696344	383.882	2519.97	1028.01	43.35	0.636777	434.706	3020.75	1307.64	0.106795	0.490248	0.480336	0.412892	0.410267	0.438901
	345.849	0.615168	407.95	2524.05	1213.45	40.3333	0.603796	493.663	2850.95	1290.88	0.10519	0.660887	0.449978	0.431342	0.432488	0.446743
	515.268	0.75691	346.291	2167.66	791.298	53.8537	0.594985	486.027	2955.72	1452.18	0.0914295	0.419976	0.57175	0.384534	0.411387	0.44822
	370.777	0.756655	367.214	2311.82	837.479	36.8243	0.648799	531.069	3259.41	1446.92	0.0888199	0.383019	0.553818	0.386075	0.413134	0.438344
	299.954	0.701977	377.126	2436.21	982.742	33.3692	0.602982	496.95	2935.37	1421.28	0.101457	0.510307	0.500403	0.408689	0.398356	0.45143
	393.343	0.73281	365.821	2412.61	913.428	63.8737	0.590975	403.939	2857.77	1342.48	0.140363	0.474007	0.52479	0.399267	0.397744	0.451511
	361.266	0.662745	384.367	2580.28	1117.42	43.0887	0.610203	538.165	3334.64	1481.57	0.105137	0.572049	0.460339	0.422432	0.39649	0.448853
	366.911	0.70671	369.178	2308.27	934.353	44.7558	0.586661	528.702	2737.76	1355.62	0.111196	0.518448	0.518562	0.408091	0.410663	0.45401
	389.579	0.715526	384.701	2478.18	978.58	46.5495	0.612869	603.513	3622.69	1574.55	0.101602	0.485214	0.509143	0.4056	0.396082	0.444625
	362.23	0.705481	362.588	2435.64	965.404	42.455	0.622669	377.673	2778.31	1235.93	0.104303	0.486343	0.497704	0.409221	0.41561	0.447722
test_2021_07_11_15_55	318.423	0.721689	330.365	2327.38	882.789	61.4143	0.632071	383.365	2925.78	1268.42	0.175643	0.45499	0.515275	0.40254	0.422001	0.440818
test_2021_07_11_15_56	380.573	0.631772	351.127	2443.61	1119.17	53.6608	0.638486	369.447	2881.44	1258.04	0.124326	0.592449	0.446089	0.429566	0.418719	0.440045
	406.294	0.710475	354.887	2319.74	920.186	70.1265	0.625301	393.674	2962.98	1338.17	0.149546	0.467856	0.520321	0.40558	0.419632	0.441151
	432.498	0.716957	333.629	2220.67	863.638	112.372	0.64316	346.497	2837.57	1168.95	0.199883	0.450833	0.529104	0.405074	0.437965	0.436956
	452.899	0.763277	336.228	2053.8	739.836	54.2437	0.633413	488.026	3057.43	1379.15	0.0978236	0.381752	0.58865	0.382089	0.410145	0.441901
	314.653	0.655995	318.495	2349.59	1011.34	119.071	0.63174	407.24	2866.25	1286.54	0.254511	0.548485	0.458514	0.425686	0.419023	0.43784
	347.695	0.700134	371.231	2384.66	973.216	43.5785	0.626491	434.908	3152.08	1414.24	0.11158	0.488623	0.50688	0.410985	0.396343	0.443188
	370.7	0.653067	354.875	2388.02	1054.53	82.3596	0.614073	413.643	2735.07	1292.91	0.198018	0.57914	0.465228	0.425653	0.428811	0.444146
	439.434	0.671402	359.556	2446.81	1042.24	64.5382	0.611402	425.543	2802.26	1309.27	0.118454	0.553705	0.482028	0.421591	0.432639	0.44168
	313.312	0.653972	362.83	2455.56	1078.89	43.6222	0.604253	413.449	2924.6	1373.02	0.121232	0.587617	0.46896	0.423777	0.401118	0.448367
	362.853	0.703979	352.345	2470.54	977.333	49.656	0.643833	344.05	2673.6	1154.77	0.122215	0.46811	0.491743	0.410376	0.416597	0.442909
	399.041	0.668021	398.028	2533.59	1099.75	38.2308	0.624188	479.049	2954.15	1353.76	0.0867405	0.554022	0.474275	0.421073	0.429918	0.440778
	366.951	0.713262	355.897	2399.43	939.683	53.0664	0.602077	400.669	2882.16	1333.55	0.120798	0.489921	0.509226	0.405915	0.410198	0.446708
	366.452	0.682288	374.267	2396.05	1011.85	55.1744	0.635095	395.25	2816.8	1245.14	0.13076	0.512323	0.495441	0.416064	0.42731	0.440923
	357.176	0.706582	375.629	2490.63	989.209	45.2086	0.638303	461.478	3032.99	1351.39	0.111734	0.468116	0.499875	0.410405	0.395533	0.444497
	353.891	0.656017	409.168	2517.93	1130.53	39.2914	0.630631	552.856	3399.71	1452.71	0.1009	0.567645	0.47608	0.423469	0.41322	0.442487
	367.471	0.677467	367.122	2420.77	1021.19	53.6294	0.616694	344.473	2644.72	1203.44	0.127621	0.531435	0.480719	0.418129	0.41526	0.450881
	272.41	0.673241	396.825	2613.96	1115.72	34.224	0.639372	457.612	2904.44	1276.45	0.114041	0.528276	0.463328	0.420444	0.425358	0.441491
	292.047	0.64531	381.619	2618.12	1169.63	42.7263	0.622772	437.093	2978.2	1254.44	0.123375	0.598006	0.451968	0.425986	0.42973	0.440287
	364.847	0.710473	351.23	2400.24	939.853	52.6568	0.622278	398.482	2765.49	1259.29	0.119792	0.478447	0.501995	0.407378	0.414861	0.446097
	324.774	0.661768	409.284	2569.59	1136.6	40.8635	0.664021	424.441	2984.96	1220.46	0.112045	0.527171	0.47014	0.423238	0.452787	0.432934
	337.537	0.701026	347.055	2464.97	973.367	48.3824	0.678261	261.017	2531.38	960.234	0.13425	0.452192	0.478122	0.412727	0.428423	0.44076
	367.095	0.752891	348.02	2295.96	830.193	57.2684	0.646791	310.271	2478.25	1054.6	0.124163	0.385291	0.549853	0.390126	0.44443	0.443236
	304.542	0.742895	348.517	2385.61	868.144	32.6803	0.659093	358.394	2884.99	1159.29	0.0969809	0.403771	0.533146	0.397403	0.43072	0.438617
	382.073	0.730824	354.903	2318.02	881.335	51.551	0.632194	420.229	3084.46	1279.49	0.11961	0.439066	0.531552	0.400363	0.419816	0.442248
	339.597	0.748117	337.575	2225.81	809.425	32.8009	0.627597	541.02	3316.29	1478.11	0.0858504	0.411655	0.558867	0.39178	0.400513	0.445493
	330.547	0.756009	323.763	2200.96	778.139	73.9651	0.678272	327.297	2761.05	1073.45	0.164097	0.368966	0.564467	0.388518	0.44507	0.431199
test_2021_07_11_16_00	303.328	0.686974	391.933	2583.55	1069.96	38.313	0.640541	414.625	3378.03	1293.88	0.112466	0.502415	0.477808	0.414749	0.419003	0.439877
test_2021_07_11_16_02	343.252	0.668804	406.726	2677.79	1148.65	49.1043	0.640907	399.863	3116.96	1289.3	0.124222	0.527283	0.455309	0.419432	0.414244	0.439771
	374.132	0.710825	397.942	2531.75	1007.65	50.8926	0.652935	383.117	2911.32	1212.53	0.12007	0.453753	0.502163	0.406837	0.428402	0.435314
	321.893	0.657755	409.45	2706.02	1185.65	49.3452	0.637182	470.25	2895.27	1297.08	0.133046	0.560339	0.461286	0.423873	0.428224	0.438575
	344.172	0.646818	413.42	2591.47	1172.52	47.26	0.586605	479.741	2798.91	1390.91	0.121151	0.629429	0.467807	0.425924	0.429321	0.449595
	353.577	0.742664	401.29	2531.55	943.719	46.3469	0.614298	490.17	2860.53	1325.74	0.113999	0.437172	0.536774	0.397757	0.435926	0.446379
	317.881	0.701694	399.816	2625.24	1061.5	42.1786	0.629794	419.632	2869.45	1277.91	0.119052	0.493707	0.492438	0.411009	0.420476	0.442351
	295.783	0.718459	399.141	2557.17	1004.08	45.5086	0.639772	505.302	3247.2	1401.73	0.130251	0.457653	0.513585	0.405973	0.413605	0.442425
	287.881	0.63461	431.159	2731.62	1261.19	45.332	0.649325	301.696	2707.99	1108.96	0.139696	0.581175	0.438523	0.427571	0.420027	0.438765
	305.092	0.664738	400.19	2638.25	1140.72	38.9184	0.640103	423.293	3396.19	1293.45	0.114484	0.542866	0.466519	0.42169	0.400339	0.442962
	296.258	0.640968	397.872	2703.44	1212.92	54.5309	0.635012	386.887	2728.87	1211.76	0.156661	0.582572	0.445154	0.428026	0.431339	0.444591
	307.683	0.669663	398.295	2610.83	1120.42	42.4239	0.606874	501.431	2883.59	1390.69	0.118206	0.564715	0.465513	0.419532	0.410522	0.450724
	284.283	0.677808	433.315	2819.36	1188.51	40.7922	0.641356	368.864	2906.27	1247.66	0.126141	0.521452	0.456378	0.418229	0.410232	0.445592
	297.606	0.718558	397.197	2592.65	1007.58	46.268	0.629499	440.98	2893.41	1297.5	0.132265	0.464072	0.495309	0.406963	0.416635	0.443081
	290.097	0.706957	387.657	2528.57	1004.74	48.7727	0.623546	426.389	2741.47	1253.16	0.136637	0.484539	0.501879	0.409475	0.42226	0.444561
	275.47	0.646738	406.914	2655.75	1192.66	43.1633	0.649397	379.613	2909.83	1215.28	0.136515	0.559327	0.454039	0.426832	0.412138	0.440483
	332.643	0.71721	394.993	2535.54	990.648	45.0764	0.61562	434.134	2813.6	1316.04	0.118185	0.472069	0.506704	0.40737	0.406798	0.445748
	319.714	0.69973	396.232	2590.09	1046.75	48.1699	0.623475	370.196	2780	1229.99	0.130794	0.495987	0.483876	0.412092	0.422815	0.442947
	229.844	0.673848	448.569	2823.49	1204.99	29.5486	0.639219	425.327	3008.34	1250.85	0.114959	0.530931	0.460644	0.419646	0.407606	0.44117
	296.084	0.667655	378.419	2464.48	1064.36	59.9791	0.615407	325.342	2666.33	1210.55	0.177001	0.563439	0.482976	0.420553	0.407207	0.449995
test_2021_07_11_16_08	202.297	0.721113	404.568	2752.72	1043.92	24.6043	0.648048	570.914	4102.88	1522.3	0.11265	0.448966	0.481198	0.40617	0.402225	0.436711
test_2021_07_11_16_09	279.588	0.552441	471.962	2644.71	1433.18	58.183	0.642482	429.859	4243.61	1361.17	0.181052	0.713943	0.419093	0.444101	0.421821	0.441306
	201.299	0.797859	391.403	2455.15	797.166	30.2644	0.682138	529.307	3166.22	1285.91	0.136863	0.304992	0.584701	0.372773	0.443371	0.427638
	232.751	0.717673	367.368	2423.2	939.414	42.0161	0.63385	434.299	2847.12	1258.61	0.151837	0.459693	0.517601	0.405436	0.422492	0.442783
	193.218	0.723162	367.713	2481.5	942.857	41.8792	0.661268	363.329	2964.58	1176.49	0.180804	0.427943	0.510685	0.402846	0.4263	0.435451
	302.573	0.729543	401.518	2471.92	956.622	39.5903	0.656113	440.742	3099.08	1271.36	0.121064	0.425055	0.525619	0.402019	0.418715	0.431621
	275.304	0.777111	369.332	2281.24	794.944	40.7011	0.662212	354.089	2874.56	1144.2	0.130154	0.350202	0.594976	0.377044	0.432488	0.433936
	310.736	0.775626	359.296	2275.34	786.378	108.966	0.633613	447.347	2754	1270	0.219091	0.359141	0.574882	0.38133	0.455731	0.437506
test_2021_07_11_16_12	232.312	0.703348	386.554	2587.33	1025.22	39.536	0.667877	501.815	3544.44	1378.15	0.143431	0.45546	0.493444	0.410578	0.412447	0.43968
test_2021_07_11_16_14	298.881	0.714291	379.986	2422.27	949.367	37.1218	0.654687	494.523	3311.69	1329.12	0.109467	0.453825	0.51971	0.404765	0.42047	0.447744
	205.903	0.719248	371.184	2415.95	938.731	39.5525	0.665385	377.102	2820.84	1166.94	0.159429	0.42882	0.518267	0.403172	0.41678	0.443219
	224.465	0.65639	365.219	2453.46	1076.59	40.0612	0.659015	433.157	3058.89	1249.76	0.153122	0.534624	0.463864	0.424116	0.418068	0.441761
	254.978	0.735927	361.729	2442.62	901.73	33.4667	0.652447	476.914	3072.75	1328.62	0.11996	0.417505	0.518101	0.39749	0.405211	0.447813
	234.474	0.6545	402.07	2651.59	1154.56	37.3974	0.639113	355.471	2727.95	1177.67	0.144571	0.555269	0.448685	0.421553	0.427874	0.45064
	175.639	0.658565	356.683	2397.39	1035.17	78.5284	0.622744	457.942	2879.71	1315.89	0.290003	0.564533	0.485186	0.423653	0.420835	0.450442
	293.21	0.609785	387.787	2522.1	1208.39	62.9961	0.624406	411.237	2672.1	1233.42	0.167792	0.640978	0.450503	0.434114	0.432331	0.447223
	219.588	0.679746	374.396	2406.68	1011.85	32.1235	0.653371	344.869	2990	1215.55	0.131097	0.500804	0.498121	0.416562	0.387408	0.448241
	234.786	0.711898	384.141	2487.72	981.392	34.8636	0.619965	422.336	2598.88	1190.38	0.131631	0.480771	0.51398	0.40638	0.391309	0.459023
	247.371	0.679639	393.652	2493.84	1053.95	41.6333	0.645381	374.226	2816.12	1210.38	0.145173	0.50839	0.491479	0.417287	0.408427	0.450741
	143.219	0.6733	445.223	2690.6	1158.14	22.7466	0.664764	533.602	3799.91	1397.73	0.147898	0.510237	0.47565	0.419178	0.392316	0.443596
	148.29	0.665614	383.068	2714.36	1134.16	26.3131	0.661547	436.861	3627.36	1310.23	0.161461	0.519177	0.450935	0.420416	0.403082	0.442535
	228.653	0.656886	389.762	2608.09	1141.06	45.9085	0.64931	392.878	2946.18	1185.44	0.168988	0.544112	0.458937	0.425135	0.429992	0.447505
	303.719	0.754911	364.113	2382.59	851.157	45.0346	0.674115	447.201	3302	1269.27	0.12843	0.376076	0.541723	0.393443	0.420128	0.436571
	219.894	0.738519	376.496	2484.98	914.804	27.5291	0.646121	454.124	3171.65	1267.4	0.114741	0.420615	0.522998	0.398226	0.406661	0.451139
	263.191	0.730631	368.364	2453.87	923.493	41.9122	0.648903	404.903	2982.59	1192.79	0.137587	0.428841	0.525923	0.4005	0.421862	0.446977
test_2021_07_11_16_17	231.408	0.667782	382.752	2420.12	1047.98	56.8112	0.617057	496.301	3056.37	1427.66	0.203018	0.550429	0.46359	0.417622	0.407125	0.442509
test_2021_07_11_16_18	190.918	0.718107	353.269	2435.63	932.836	45.2102	0.634453	518.491	3146.79	1343.87	0.164029	0.461327	0.509111	0.404697	0.434188	0.43861
	178.426	0.635155	373.701	2532.36	1142.6	38.2597	0.630835	379.635	3097.51	1223.92	0.182264	0.599898	0.437407	0.427823	0.420413	0.44428
	152.954	0.690268	374.718	2408.09	986.102	32.3556	0.661697	432.303	3232.81	1264.61	0.18193	0.479824	0.49917	0.411434	0.417758	0.434449
	242.395	0.656851	357.697	2468.29	1079.07	43.5175	0.632803	413.869	2913.9	1272.34	0.156859	0.558689	0.46799	0.421389	0.415272	0.440964
	244.952	0.680982	373.982	2352.27	1005.8	49.0663	0.652153	542.995	4159.22	1479.83	0.172568	0.508478	0.500259	0.411311	0.412358	0.436486
	207.501	0.686454	354.549	2386.49	988.875	42.5567	0.637134	390.483	2938.17	1208.31	0.180115	0.513136	0.483497	0.413772	0.417506	0.442309
	184.579	0.696695	366.34	2331.8	954.925	39.4599	0.644021	429.824	3042.5	1223.31	0.175791	0.482472	0.508605	0.41027	0.437126	0.438799
	176.077	0.645309	386.635	2545.82	1139.15	36.9432	0.668223	394.963	2928.79	1168.75	0.179109	0.542159	0.457988	0.42492	0.424016	0.435861
test_2021_07_30_13_59	444.553	0.619397	461.702	2641.89	1286.66	65.1489	0.616064	519.836	2946.46	1375.01	0.128974	0.635363	0.429902	0.431577	0.434573	0.438441
test_2021_07_30_14_01	440.566	0.62959	396.663	2475.09	1158.61	64.0526	0.640587	544.509	3471.46	1501.3	0.124748	0.595379	0.45206	0.428613	0.409731	0.435102
	487.625	0.657425	414.836	2514.68	1125.74	59.7344	0.616575	555.791	2945.91	1421.48	0.108574	0.578378	0.462619	0.422635	0.432944	0.440735
	418.627	0.590423	387.277	2397.81	1210.32	70.6017	0.634753	455.761	2976.28	1341.73	0.145191	0.660656	0.453487	0.435797	0.430203	0.433207
	455.2	0.592514	400.276	2454.4	1229.95	55.6	0.6701	489.067	3847.27	1330.93	0.108781	0.626036	0.434936	0.436005	0.427502	0.430898
	149.929	0.5807	511.473	2957.12	1520.62	45.4286	0.665241	312.647	2680.88	1094.44	0.243058	0.635679	0.364971	0.437392	0.427739	0.435686
	433.704	0.604668	396.831	2469.3	1208.95	63.0306	0.662487	510.783	3242.01	1300.16	0.12928	0.610104	0.446264	0.433962	0.444861	0.431932
	481.25	0.623504	369.243	2364.22	1109.83	67.6389	0.674956	459.663	3359.78	1331.74	0.122517	0.566657	0.452377	0.429058	0.428372	0.427289
	409.461	0.622487	404.674	2525.55	1195.07	69.5345	0.604392	480.26	3184.34	1378.29	0.146598	0.647529	0.445379	0.430335	0.43784	0.440733
	453.204	0.60511	403.24	2471.92	1215.39	75.6311	0.640179	524.787	3246.62	1399.66	0.139871	0.635443	0.447496	0.433878	0.435005	0.434939
	476.899	0.611045	396.928	2426.8	1180.66	65.9275	0.655448	592.904	3263.3	1461.41	0.122209	0.606568	0.453706	0.432217	0.411156	0.437501
	463.289	0.685565	401.792	2450.16	1040.29	73.3684	0.678699	527.717	3411.88	1410.48	0.136757	0.469316	0.487737	0.415268	0.423973	0.425042
	449.328	0.648869	352.6	2308.12	1042.69	82.041	0.64095	432.166	3017.54	1279.36	0.140754	0.553965	0.471125	0.420538	0.4416	0.437562
	416.091	0.625658	474.568	2760.11	1313.41	63.75	0.659689	469.479	3123.88	1324.76	0.134703	0.578836	0.439679	0.429007	0.42049	0.432009
	431.588	0.623141	366.856	2432.53	1137.82	67.6173	0.624075	509.82	3415.51	1437.45	0.13469	0.618823	0.450759	0.429786	0.426023	0.438514
	468.195	0.669203	398.943	2481.66	1081.79	65.3117	0.636664	594.141	3334.93	1483.16	0.121035	0.539557	0.47324	0.420315	0.42723	0.436717
	496.337	0.675632	343.043	2265.19	957.605	66.6386	0.631618	403.768	2843.85	1257.8	0.116295	0.526082	0.495469	0.415749	0.428734	0.439511
	422.736	0.649023	448.492	2659.21	1215.84	58.7547	0.652827	479.422	3308.65	1396.75	0.123583	0.550537	0.454864	0.425728	0.422796	0.430211
	501.071	0.637125	449.475	2568.16	1209.7	59.5714	0.660284	434.54	2921.26	1226.27	0.110475	0.558961	0.462132	0.427949	0.418623	0.431715
	463.207	0.6495	357.409	2237.59	1015.66	55.8276	0.681033	427.406	3030.23	1239.41	0.112331	0.520107	0.485308	0.423344	0.426297	0.429251
	448.9	0.647291	441.23	2611.95	1198.77	78.22	0.636782	609.154	3511.03	1559.68	0.147239	0.572044	0.448146	0.425993	0.420005	0.436436
	378.833	0.646133	363.37	2500.4	1117.52	44.7	0.679193	306.937	2485.51	989.016	0.115664	0.525873	0.451296	0.425937	0.449337	0.430182
	335.149	0.638849	394.354	2547.17	1159.42	56.7025	0.679341	486.421	3589.88	1337.68	0.151975	0.544399	0.435364	0.426915	0.426239	0.428263
	485.889	0.588949	441.35	2410.92	1244.5	51.4444	0.65449	464.69	3303.25	1311.63	0.0953864	0.656718	0.44973	0.438519	0.447458	0.429742
	483.203	0.635	437.073	2526.43	1188.92	67.6631	0.63552	554.043	3145.1	1429.42	0.122715	0.596675	0.456085	0.427518	0.427219	0.433665
	402.815	0.640434	474.907	2583.91	1223.81	53.963	0.591251	487.488	2530.15	1276.32	0.123749	0.631256	0.4607	0.427962	0.430677	0.44196
	492.277	0.663834	388.202	2408.11	1062.09	57.4894	0.615094	600.763	3368.93	1485.67	0.104786	0.562704	0.48632	0.421374	0.43199	0.446628
	496.053	0.737247	379.92	2324.05	887.443	65.0682	0.659884	433.167	2867.81	1222.63	0.116541	0.404388	0.527385	0.398053	0.442452	0.430053
	568.789	0.667573	370.986	2416.3	1050.67	56	0.675388	352.512	2838.77	1046.09	0.0917819	0.503963	0.478364	0.42277	0.475377	0.430403
	460.733	0.64382	430.621	2571.24	1181.06	63.66	0.643983	485.555	3078.46	1356.17	0.122428	0.567705	0.452701	0.424877	0.429565	0.434776
	488	0.618417	422.842	2302.23	1133.82	55.8667	0.661916	522.521	3567.39	1431.28	0.106385	0.599783	0.475	0.429305	0.424702	0.427756
	490.545	0.647797	370.698	2266.64	1034.39	70	0.68348	426.119	2742.7	1137.48	0.127747	0.522227	0.493549	0.424858	0.475785	0.426348
	478.2	0.649858	393.263	2321.33	1064.79	47.8	0.692688	578.181	4772.5	1400.99	0.0924721	0.528683	0.49429	0.422595	0.428789	0.422952
	502.25	0.707844	398.76	2253.75	941.075	47.1875	0.720382	499.873	3527.29	1300.62	0.0866858	0.413269	0.524498	0.405334	0.405879	0.417212
	524.978	0.679224	401.435	2473.12	1062.21	63.0326	0.659312	492.482	3998.52	1375.63	0.108132	0.499595	0.475852	0.41688	0.4419	0.42644
	388.654	0.607872	398.697	2504.29	1221.43	56.8131	0.663773	440.023	3066.97	1274.89	0.132444	0.603883	0.444129	0.431437	0.433171	0.431224
	442.628	0.619201	446.618	2485.13	1211.35	64.8718	0.609239	452.537	3439.35	1363.85	0.130432	0.644946	0.453308	0.430359	0.431331	0.440171
	321.403	0.562733	410.046	2589.83	1356.16	55	0.68912	393.79	3384.76	1195.41	0.148288	0.643963	0.4116	0.441228	0.430319	0.425355
	497.75	0.65212	427.948	2455.91	1123.51	56.4688	0.656166	588.536	4156.16	1489.15	0.101162	0.560627	0.475829	0.422353	0.424067	0.431845
	386.451	0.658667	409.214	2297.02	1043.25	62.3415	0.658598	353.406	2612.73	1082.32	0.152827	0.525528	0.488472	0.416821	0.451563	0.429926
	461	0.670524	417.743	2591.58	1129.37	62.7027	0.672732	551.789	3407.35	1366.9	0.122213	0.503113	0.461814	0.420492	0.451688	0.424557
	469.938	0.677872	383.137	2518.35	1063.15	59.0625	0.638455	423.707	2934.11	1297.53	0.109704	0.509903	0.471632	0.41785	0.443784	0.437784
	468.69	0.662974	401.869	2317.85	1035.59	56.6667	0.67791	410.403	2835.81	1175.77	0.106138	0.502796	0.492163	0.417394	0.454817	0.428902
	439.429	0.717071	372.221	2172.18	880.004	48.4762	0.681218	390.075	2847.11	1143.58	0.0987834	0.417704	0.546674	0.402258	0.443575	0.427027
	430.143	0.504023	402.758	2792.49	1614.07	127	0.566175	354.449	2493.11	1284.39	0.207905	0.882759	0.315543	0.441049	0.41737	0.455187
	378.347	0.647519	385.634	2368.57	1078.07	56.1111	0.644855	392.991	2675.62	1147.64	0.151521	0.556232	0.485464	0.42345	0.46848	0.432564
	338.895	0.660324	291.401	2166.84	925.979	131.829	0.617782	444.001	2727.92	1285.23	0.288515	0.560904	0.479	0.424293	0.438583	0.438372
	441	0.644771	410.994	2407.87	1109.71	60.6	0.692654	574.055	2748.34	1184.17	0.119984	0.528735	0.484673	0.423559	0.484224	0.431443
	485.657	0.647835	436.927	2568.36	1179.41	68.2593	0.647754	504.612	3105.03	1345.29	0.125713	0.556855	0.451895	0.425515	0.427471	0.437555
	511.311	0.639439	444.102	2501.8	1180.56	79.1556	0.627535	546.604	2856.21	1349.53	0.132851	0.592609	0.452353	0.427038	0.443672	0.43779
	378.703	0.612196	401.587	2459.97	1187.09	62.1757	0.656067	544.382	3575.93	1400.93	0.140784	0.608239	0.45518	0.431208	0.427453	0.431457
	464.023	0.630239	451.156	2554.28	1221.15	71.0846	0.613695	432.458	2794.83	1302.9	0.13248	0.623382	0.454819	0.428774	0.437099	0.445038
	531.26	0.682545	414.996	2427.1	1045.75	67.64	0.652768	613.754	3463.16	1537.13	0.111046	0.506573	0.488027	0.41582	0.415093	0.433778
	278	0.692708	513.97	3278.64	1363.53	29	0.625221	234.438	2733.7	1171.11	0.0944625	0.491493	0.438758	0.409745	0.430396	0.464
	420.041	0.680152	388.22	2298.01	988.483	86.3061	0.643083	355.09	2144.76	966.683	0.161366	0.512472	0.48866	0.413234	0.530626	0.427653
	371.565	0.65562	403.201	2458.41	1096.98	50.5484	0.646031	428.263	3032.54	1286.32	0.124367	0.551432	0.470865	0.42214	0.426576	0.436026
	443.571	0.649669	427.838	2618.42	1188.23	62.9286	0.650049	474.881	2947.37	1299.44	0.127144	0.546789	0.449158	0.424849	0.451977	0.434615
	362.538	0.666108	440.463	2547.91	1125	60.5385	0.64492	419.296	2280.78	1057.96	0.151962	0.519756	0.481797	0.417815	0.48932	0.428534
	463.928	0.695751	433.719	2560.83	1080.79	59.7526	0.660961	556.055	4386.36	1447.8	0.113644	0.482194	0.490837	0.411657	0.434199	0.430534
	424.97	0.715532	444.509	2566.01	1041.22	57.9552	0.628392	444.194	3163.67	1260.53	0.119809	0.468258	0.510159	0.407743	0.436323	0.437861
	393.816	0.645823	392.007	2462.27	1120.36	55.9868	0.635832	398.842	2982.06	1268.91	0.132926	0.579337	0.461557	0.425607	0.436731	0.43664
	348.773	0.71929	420.456	2651.14	1039.68	51.0909	0.649308	413.589	2589.62	1125.85	0.127104	0.458205	0.491539	0.406505	0.483993	0.429938
	451.5	0.707489	430.221	2532.88	1041.14	55.125	0.691967	425.278	3236.86	1230.19	0.10906	0.428819	0.489786	0.410693	0.440321	0.418878
	491.091	0.586872	377.162	2324.11	1179.53	59.1818	0.655206	493.38	3425.77	1451.6	0.111238	0.639553	0.441568	0.438193	0.418491	0.428949
	478.75	0.66642	433.601	2431.89	1087.6	70.5	0.634528	507.017	3110.63	1407.07	0.129067	0.544723	0.48149	0.418526	0.437361	0.430158
	470.324	0.611424	399.854	2440.3	1186.79	52.5294	0.686794	425.425	3044.87	1113.63	0.100839	0.579645	0.455822	0.43319	0.471542	0.423871
	432.143	0.689883	442.019	2402.6	1042.58	57.6286	0.649173	567.867	3237.37	1433.95	0.11817	0.48876	0.498377	0.413744	0.441981	0.43734
	447.362	0.578457	397.88	2348.46	1213.8	51.1489	0.673263	361.281	2698.58	1068.1	0.107305	0.63744	0.442724	0.436954	0.455893	0.423784
	338.5	0.664747	394.15	2357.22	1045.51	71.0213	0.665578	421.006	2794.23	1193.13	0.186683	0.509312	0.49065	0.420753	0.451072	0.431831
	396.351	0.679668	445.482	2661.21	1143.8	58.5946	0.63777	378.797	2647.97	1167.12	0.135877	0.513744	0.467857	0.417492	0.454367	0.437037
	348.773	0.71929	420.456	2651.14	1039.68	51.0909	0.649308	413.589	2589.62	1125.85	0.127104	0.458205	0.491539	0.406505	0.483993	0.429938
test_2021_07_30_14_04	470.852	0.718057	642.177	3395.78	1410.62	94.9877	0.61124	493.631	2990.07	1416.19	0.167877	0.480668	0.454693	0.410534	0.417757	0.441018
test_2021_07_30_14_06	497.992	0.677516	630.528	3236.46	1457.92	93.576	0.632218	528.067	3172.15	1439.59	0.155425	0.522739	0.443904	0.420558	0.428836	0.434498
	508.515	0.680655	613.536	3119.53	1400.67	96.4848	0.62791	543.443	3163.2	1486.97	0.157523	0.512911	0.452424	0.420386	0.422337	0.434872
	499.49	0.683004	563.212	3035.1	1330.48	93.8824	0.648279	463.956	3098.73	1353.56	0.156198	0.497722	0.462194	0.417549	0.436084	0.431486
	417.523	0.681827	536.751	2978.5	1300.43	116.985	0.643292	506.313	2963.51	1359.74	0.220349	0.501569	0.467716	0.418138	0.441843	0.434478
	381.46	0.634016	508.382	2792.83	1335.42	109.12	0.660237	440.419	2783.16	1207.12	0.212203	0.560145	0.439022	0.428418	0.451796	0.426161
	481.113	0.692288	551.71	3105.78	1329.26	87.2742	0.618501	422.436	2716.22	1272.75	0.152141	0.506361	0.467232	0.41743	0.43278	0.439839
	488.664	0.668803	608.884	3118.41	1425.29	136.592	0.676458	362.52	2484.99	1026	0.217553	0.508435	0.445912	0.423901	0.471098	0.424361
	459.395	0.732277	527.564	3088.28	1207.39	109.286	0.6431	381.519	2698.44	1189.47	0.189105	0.425103	0.490444	0.404973	0.441128	0.434432
test_2021_07_30_14_04	496.854	0.679735	603.48	3183.67	1420.95	104.882	0.625136	412.797	2754.66	1256.76	0.173193	0.525227	0.448785	0.419864	0.428591	0.440276
test_2021_07_30_14_06	490.3	0.680877	539.817	2926.61	1290.02	84.175	0.632398	511.376	2836.61	1338.81	0.147278	0.517407	0.456624	0.417723	0.419848	0.43732
	449.457	0.732693	542.975	3153.68	1229.16	115.186	0.63306	419.945	2610.14	1193.79	0.205377	0.434963	0.483412	0.404184	0.470372	0.435437
	459.51	0.722542	566.439	3210.77	1295.52	94.2812	0.666811	387.533	2658.6	1131.68	0.167885	0.423079	0.475422	0.40732	0.456982	0.428809
	397.75	0.678418	572.33	3146.7	1389.37	93.8106	0.659458	381.097	2734.11	1164.15	0.190526	0.495226	0.445571	0.419353	0.443151	0.429536
	505.748	0.690264	608.863	3154.48	1390.51	118.306	0.616714	420.759	2710.25	1275.95	0.195212	0.516111	0.453413	0.418894	0.431972	0.439012
	555.493	0.713486	557.175	2873.64	1214.16	102.466	0.603046	471.597	2875.7	1376.3	0.153851	0.487692	0.498342	0.409382	0.430288	0.443735
	437.008	0.662631	584.841	3016.29	1395.31	97.3713	0.681052	396.037	3156.6	1165.26	0.17891	0.504559	0.450107	0.42406	0.445785	0.425913
test_2021_07_16_16_41	529.032	0.680084	617.838	3229.12	1447.17	133.063	0.638296	442.855	2786.02	1278.4	0.192496	0.511683	0.446874	0.420563	0.445578	0.432726
test_2021_07_16_16_42	472.587	0.648476	610.822	3214.7	1517.47	112.931	0.640251	477.67	3078.87	1393.34	0.189054	0.558835	0.422278	0.424186	0.417351	0.435007
	538.656	0.672257	567.466	2994.69	1357.61	104.11	0.6302	479.421	2923.53	1363.56	0.158132	0.530135	0.46231	0.421152	0.428517	0.436246
	415.41	0.667179	575.626	3187.48	1438.93	102.551	0.629544	371.303	2622.59	1178	0.196497	0.539625	0.437727	0.421487	0.431872	0.438657
	417.911	0.669659	563.749	3058.97	1374.55	104.236	0.621338	411.576	2562.64	1194.17	0.200813	0.538068	0.449276	0.420339	0.452118	0.438725
	489.51	0.720698	567.962	3102.72	1271.87	113.424	0.634265	376.261	2655.1	1197.39	0.179063	0.453312	0.486103	0.406293	0.443276	0.437693
	488.582	0.675252	620.467	3341.61	1494.04	107.927	0.66061	418.051	2805.38	1203.63	0.171566	0.50058	0.432485	0.420005	0.44591	0.431195
	458.973	0.655727	621.502	3237.28	1509.26	94.0535	0.638584	404.556	2795.25	1247.91	0.168316	0.547359	0.435718	0.424613	0.443486	0.438077
	451.936	0.667959	489.74	2914.39	1289.22	218.956	0.738313	249.322	2155.6	777.264	0.276716	0.456657	0.451722	0.421164	0.513063	0.399325
	412.303	0.694529	535.567	3024.53	1285.66	131.838	0.662141	400.214	2616.64	1132.15	0.243963	0.474449	0.467616	0.414022	0.458209	0.426794
	537.163	0.656642	628.647	3088.68	1456.23	104.192	0.62948	503.928	3029.44	1381.13	0.15983	0.57005	0.445412	0.425882	0.43551	0.432663
	508.158	0.690355	521.791	2911.98	1254.86	185.094	0.677511	332.41	2351.67	976.164	0.240077	0.464444	0.471441	0.414964	0.479252	0.42348
	396.312	0.716925	541.934	3156.35	1270.05	110.917	0.702858	370.813	2609.62	1010	0.216487	0.413052	0.471434	0.408035	0.469315	0.414298
	366.192	0.636386	491.776	3071.61	1420.92	166.615	0.643891	382.873	2393.78	1078.77	0.300352	0.569342	0.410833	0.425416	0.463985	0.43012
	503.995	0.678379	588.34	3095.13	1383.97	119.161	0.692366	331.541	2458	979.229	0.187445	0.471763	0.456218	0.42007	0.46131	0.423504
	523.283	0.704291	579.105	3265.12	1369.45	96.1321	0.675766	361.301	2608.92	1074.81	0.151884	0.444236	0.454699	0.413005	0.444423	0.432036
	518.718	0.700652	617.271	3214.36	1386.94	122.806	0.669301	382.858	2709.87	1153.53	0.186453	0.45324	0.456367	0.41601	0.447632	0.42598
	521.394	0.653956	638.244	3039.06	1456.53	102.232	0.640017	530.409	3151.86	1421.78	0.161824	0.557213	0.447389	0.427411	0.424666	0.435539
	424.408	0.683095	556.216	3203.3	1382.69	93.5658	0.669464	284.552	2289.89	944.223	0.179742	0.482474	0.448297	0.415962	0.456403	0.428527
	459.948	0.689097	580.561	3132.23	1360.96	93.9221	0.639438	518.715	3043.49	1383.66	0.169034	0.500256	0.458893	0.417066	0.429256	0.435218
	515.665	0.723304	533.719	2984.32	1206.32	89.7532	0.647284	436.956	2859.35	1262.5	0.146844	0.433488	0.493907	0.407127	0.429958	0.433487
	562.192	0.84315	497.037	2990.49	887.366	134.735	0.663972	503.55	3020.85	1292.28	0.198218	0.239279	0.609375	0.361265	0.458756	0.42913
	523.786	0.696058	589.895	3087.37	1337.01	99.2071	0.610555	449.929	2888.51	1371.53	0.159677	0.504563	0.466691	0.415705	0.416166	0.441293
	461.109	0.71206	616.482	3215.76	1355.91	82.5156	0.6522	437.973	2940.68	1277.25	0.152031	0.449802	0.471947	0.413097	0.424738	0.432367
	550.409	0.807128	504.143	3151.2	1012.34	109.288	0.646957	386.641	2623.99	1160.1	0.162063	0.303697	0.546392	0.37924	0.451578	0.434306
	506.603	0.698613	614.04	3276.5	1406.44	113.486	0.635946	395.37	2716.8	1217.53	0.184633	0.479677	0.457702	0.41575	0.43409	0.435834
	421.452	0.710082	558.297	2967.47	1248.82	105.956	0.668066	321.812	2469.87	1020.58	0.196192	0.442415	0.498785	0.410904	0.479277	0.429544
	491.723	0.723178	538.867	3032.53	1220.27	86.104	0.637253	364.493	2528.59	1118.79	0.14741	0.449303	0.488668	0.408004	0.454663	0.436636
	473.211	0.683144	583.545	3188.98	1400.08	109.887	0.625973	374.252	2433.95	1127.99	0.180901	0.516805	0.4517	0.418139	0.465082	0.43481
	560.079	0.759194	511.174	2897.96	1074.67	108.368	0.650567	396.737	2560.84	1126.07	0.166605	0.373784	0.526278	0.396476	0.457526	0.43102
	562.259	0.76759	524.523	2923.53	1076.23	104.447	0.626245	339.206	2441.49	1071.84	0.154858	0.379683	0.53702	0.3929	0.478572	0.437039
	548	0.682361	597.494	3130.9	1391.39	109.333	0.591534	396.818	2532.92	1244.39	0.16323	0.556352	0.454657	0.41953	0.436043	0.444274
	514.917	0.678947	590.188	3132.62	1398.92	106.3	0.659381	419.099	2696.26	1176.65	0.166615	0.495737	0.453412	0.420513	0.457737	0.428575
	563.018	0.702914	631.47	3277.92	1414.1	103.807	0.622776	412.072	2510.3	1182.15	0.153766	0.486361	0.453493	0.415872	0.451134	0.435925
	435.842	0.645045	611.654	3112.41	1490.63	90.604	0.630888	386.236	2500.57	1140.38	0.178398	0.57295	0.440921	0.427062	0.4659	0.435136
	456.232	0.659354	588.897	3100.75	1434.07	99.1053	0.674421	380.322	2766.64	1137.51	0.177831	0.510594	0.438145	0.423276	0.436347	0.428941
	346.005	0.744085	482.112	2885.2	1086.03	131.333	0.642748	425.796	2663.09	1203.66	0.312046	0.403581	0.517142	0.399626	0.457213	0.435393
	451.38	0.674903	561.878	3010.77	1345.56	93.8102	0.645784	376.56	2626.83	1141.21	0.172004	0.509909	0.464253	0.421132	0.447494	0.433412
	446.897	0.646391	596.915	3293.76	1555.05	90.2308	0.605576	353.762	2384.59	1140.41	0.170506	0.597012	0.409118	0.423194	0.440658	0.442461
	501.754	0.700719	612.735	3289.49	1405.95	84.7281	0.642104	418.719	2710.41	1194.59	0.146098	0.480378	0.455607	0.414833	0.448867	0.433586
	482.72	0.671775	632.908	3332.1	1510.95	86.3136	0.626933	356.408	2503.85	1127.96	0.153451	0.532247	0.425327	0.420055	0.446677	0.437012
	565.82	0.735472	586.451	3199.06	1266.86	93.7266	0.641431	441.275	2774.61	1249.37	0.141765	0.41987	0.485032	0.405755	0.443669	0.436049
test_2021_07_16_16_44	495.189	0.701138	604.932	3212.84	1376.81	79.3208	0.607891	341.686	2453.56	1144.76	0.137137	0.504564	0.459102	0.415206	0.454537	0.440912
test_2021_07_16_16_46	458.174	0.672823	625.13	3175.55	1449.98	78.7826	0.650016	392.867	2811.71	1217.16	0.146659	0.507589	0.451641	0.422328	0.432192	0.435947
	560.029	0.847044	492.066	2973.53	870.034	137.506	0.665034	507.87	3009.97	1286.96	0.202506	0.232781	0.614464	0.359538	0.461526	0.42896
test_2021_07_30_14_08	463.478	0.644154	445.028	2545.59	1188.08	88.3913	0.591779	452.009	2779.97	1370.83	0.159948	0.620824	0.463676	0.426602	0.431824	0.44268
test_2021_07_30_14_10	365.664	0.669049	468.878	2572.67	1159.77	84.1455	0.641684	465.206	2932.15	1303.03	0.189535	0.524937	0.484601	0.418282	0.445878	0.433548
	460.56	0.700481	444.965	2574.33	1079.72	100.164	0.648013	427.599	2806.05	1244.17	0.17534	0.469645	0.496714	0.411391	0.451372	0.433893
	357	0.735158	407.953	2604.49	978.124	99.5625	0.684658	432.569	2995.95	1203.46	0.22386	0.392539	0.509096	0.400156	0.454987	0.424571
	491.432	0.64641	438.84	2509.46	1164.91	100.084	0.656303	487.711	2979.98	1301.37	0.164027	0.554682	0.475227	0.425012	0.447793	0.432175
	427.274	0.674206	480.691	2605.8	1165.05	96.2742	0.624581	435.828	2925.58	1302.29	0.181639	0.531386	0.48846	0.416539	0.439191	0.439698
	431.075	0.647249	442.724	2654.98	1207.37	91.5489	0.694959	337.285	2687.12	1048.98	0.174277	0.514324	0.463297	0.425208	0.463601	0.423554
	426.098	0.624598	456.612	2614.38	1259.68	92.3706	0.624097	469.391	2908.72	1338.09	0.17832	0.622247	0.452599	0.430478	0.434918	0.43812
	518.099	0.640992	491.967	2687.91	1271.9	118.222	0.641166	483.974	2858.99	1296.68	0.181143	0.578598	0.453976	0.427297	0.4498	0.433582
	377.63	0.640533	445.76	2604.24	1210.75	127.06	0.63505	381.845	2432.6	1114.68	0.244179	0.572375	0.463529	0.426207	0.464384	0.433788
	482.391	0.620445	449.764	2390.69	1173.92	82.5652	0.64482	461.017	2932.11	1309.16	0.145091	0.601156	0.475443	0.427808	0.426602	0.429973
	464.413	0.692483	481.098	2612.23	1131.08	90.9231	0.647309	531.398	2898.72	1310.95	0.162617	0.490464	0.496468	0.413404	0.448387	0.434421
	487.362	0.65712	479.026	2553.56	1183.48	96.1724	0.58521	410.812	2673.16	1308.37	0.162834	0.605216	0.482416	0.42375	0.437016	0.442479
	424.953	0.67763	474.901	2703.35	1186.11	114.236	0.633809	425.012	2679.44	1195.84	0.205498	0.522534	0.475679	0.418954	0.452444	0.431584
	455.273	0.642789	422.784	2533.09	1161.74	77.5455	0.658675	409.842	2787.42	1217.76	0.145734	0.543073	0.478128	0.425743	0.44282	0.429733
	507.256	0.689714	447.699	2588.01	1101.28	94.3953	0.671839	599.034	4495.13	1524	0.153949	0.477544	0.491634	0.413856	0.424123	0.43183
	434.14	0.686381	555.04	3052.26	1327.42	93.1163	0.631877	612.672	3255.03	1504.36	0.176468	0.507782	0.463959	0.41777	0.419932	0.437347
	461.2	0.727172	541.607	2907.02	1180.56	73.2	0.619008	380.218	2556.92	1183.1	0.135609	0.455029	0.482004	0.408393	0.430186	0.438027
	327.036	0.666176	439.132	2758.2	1205.58	104.524	0.676964	335.179	2437.98	1003.91	0.239199	0.500304	0.4517	0.419523	0.476302	0.42529
	407.741	0.645067	506.936	2716.38	1279	99.6296	0.658548	477.205	2838.98	1236.45	0.209424	0.552259	0.45416	0.426036	0.454623	0.427515
	434.947	0.69495	437.448	2450.95	1048.03	87.3579	0.623275	458.572	2805.6	1293.51	0.167418	0.503752	0.510617	0.411886	0.442109	0.437097
	412.574	0.670856	489.249	2842.32	1253.79	82.5147	0.646668	367.882	2573.23	1130.18	0.167749	0.515831	0.459707	0.420222	0.442077	0.435269
	507.632	0.653665	454.608	2417.84	1128.19	103.316	0.566986	375.944	2337	1187.02	0.168544	0.642867	0.489663	0.421303	0.463137	0.448338
	413.366	0.68132	497.9	2823.45	1233.75	85.2418	0.631337	449.838	2805.93	1277.98	0.170552	0.520606	0.462121	0.417747	0.435787	0.435591
	443.843	0.67772	484.966	2789.66	1216.33	89.4314	0.668142	476.717	3443.58	1338.49	0.168042	0.496281	0.455736	0.417681	0.416148	0.429538
	443.667	0.646638	427.55	2613.76	1192.83	101.186	0.63444	433.948	2668.27	1207.74	0.180396	0.5769	0.45001	0.425687	0.451815	0.432025
	511.395	0.66947	456.177	2637.08	1170.49	89.8655	0.643478	457.821	2764.61	1252.06	0.148073	0.523047	0.477598	0.420399	0.444502	0.43203
test_2021_07_30_14_08	426.204	0.648858	450.567	2741.11	1236.08	92.7222	0.672338	434.632	2875.06	1198.04	0.178019	0.52966	0.453705	0.424468	0.44567	0.427643
test_2021_07_30_14_10	435.44	0.665157	441.007	2656.93	1175.66	93.2198	0.624985	395.69	2585.81	1189.94	0.175484	0.545903	0.469846	0.422804	0.460201	0.436034
	378.321	0.609504	395.601	2563.7	1231.21	73.6786	0.664424	345.454	2767.16	1135.03	0.167146	0.590703	0.433301	0.43227	0.428835	0.433238
	427.826	0.648636	501.626	2679.47	1256.39	89.5304	0.627105	403.913	2482.78	1149.43	0.172057	0.579898	0.461606	0.425398	0.462134	0.435993
	417.52	0.713665	429.384	2369.19	974.511	84.78	0.62116	360.663	2728.04	1246.28	0.173085	0.470661	0.535905	0.403834	0.42463	0.442013
	479.837	0.666592	441.634	2627.19	1164.65	109.375	0.666255	450.795	2904.66	1262.18	0.179646	0.504315	0.469784	0.421216	0.444223	0.430142
	483.643	0.682413	451.774	2663.09	1146.65	90.9286	0.605487	393.458	2642.67	1255.95	0.159782	0.533321	0.48421	0.417278	0.432346	0.442247
	459.833	0.660505	412.149	2460.81	1087.45	74.4167	0.637224	301.855	2722.7	1155.75	0.149389	0.538402	0.482939	0.418928	0.423146	0.43959
	442	0.662954	403.603	2424.17	1082.16	84.5	0.662721	508.744	3305.16	1439.05	0.160504	0.513455	0.49427	0.424491	0.423607	0.42683
	407.143	0.683106	440.672	2436.58	1060.54	70.1429	0.633318	398.407	2702.03	1166.13	0.15334	0.519476	0.503468	0.413267	0.439546	0.431091
	297.32	0.608029	493.871	2724.04	1359.57	86.06	0.630307	402.177	2851.76	1262.76	0.228469	0.63005	0.435656	0.433805	0.438573	0.435286
	414.716	0.662495	473.142	2687.38	1214.44	78.3134	0.643918	367.963	2726.98	1172.08	0.165731	0.531298	0.472842	0.423172	0.436792	0.432783
	463.444	0.641838	465.792	2630.45	1233.63	103.278	0.667884	417.043	2895.32	1230.25	0.18751	0.538184	0.480107	0.427696	0.453374	0.429247
	377.479	0.628756	465.264	2609.25	1249.46	94.359	0.654427	403.455	2710.03	1165.6	0.201257	0.578362	0.453349	0.429548	0.464397	0.431111
	397.588	0.662363	468.638	2603.68	1184.16	80.3529	0.659236	422.735	2960.37	1254.52	0.164056	0.519485	0.483005	0.423945	0.448249	0.427608
	342.053	0.691972	501.139	2547.14	1109.45	104	0.713998	390.909	2813.99	1049.56	0.224731	0.433673	0.501063	0.415645	0.493928	0.412183
	444.79	0.693732	552.822	3012.81	1297.68	100.226	0.632715	545.413	3163.23	1431.23	0.183228	0.495002	0.470138	0.416178	0.423666	0.433842
test_2021_07_30_14_12	437.714	0.743898	430.794	2479.34	948.662	58.8571	0.649169	466.169	2867.78	1303.53	0.128109	0.399447	0.521474	0.396199	0.450698	0.441211
test_2021_07_30_14_13	406.722	0.691847	373.538	2259.33	945.401	58.6667	0.690005	502.176	2976.71	1250.42	0.126465	0.448267	0.517249	0.409491	0.482268	0.427697
test_2021_07_16_16_50	336.525	0.660219	392.681	2427.05	1063.73	59.1356	0.691503	544.336	2778.91	1221.1	0.160446	0.494008	0.501567	0.417344	0.527707	0.429252
	388.929	0.671581	423.712	2646.86	1144.96	48.2857	0.685945	434.889	3078.41	1251	0.112075	0.482636	0.470887	0.420034	0.465304	0.435142
	422.57	0.647535	387.281	2279.6	1043.34	66.0165	0.619538	479.824	2935.07	1395.52	0.134374	0.578722	0.481561	0.42135	0.447007	0.44866
	506.5	0.66617	421.33	2418.29	1084.83	52.1667	0.655215	409.384	2924.79	1241.58	0.0920643	0.519963	0.504089	0.420516	0.469597	0.437461
	399.347	0.687004	370.633	2341.81	979.814	83.8614	0.623887	461.694	2788.23	1327.49	0.179566	0.504583	0.502832	0.414185	0.478355	0.449876
	375.094	0.661003	410.596	2471.42	1105.41	97.9623	0.641705	444.083	2813.67	1284.69	0.225417	0.531247	0.483845	0.422689	0.479864	0.442722
	376.597	0.657363	407.229	2295.94	1048.32	63.629	0.664926	419.932	2705.49	1177.91	0.148166	0.520073	0.496601	0.418432	0.503163	0.434337
	491.656	0.691509	431.166	2547.34	1087.96	66.32	0.638737	478.257	2910.53	1342.01	0.119043	0.48861	0.500242	0.411592	0.46127	0.443131
	446.286	0.636081	428.487	2510.86	1177.05	68.0857	0.602425	509.887	3004.01	1480.84	0.131077	0.61341	0.466006	0.425966	0.4417	0.453835
	489.273	0.65338	396.752	2285.66	1044.4	64.5909	0.606069	440.73	2825.07	1381.56	0.112634	0.580784	0.501998	0.422042	0.460377	0.455219
	388	0.713219	447.365	2593.81	1062.63	45.375	0.583765	490.79	2789.02	1448.5	0.114248	0.494596	0.492031	0.409348	0.442059	0.462685
	364.484	0.664194	426.744	2571.22	1135.85	70.4677	0.650686	387.624	2772.4	1206.09	0.161523	0.519027	0.468297	0.421273	0.480963	0.444942
	497.457	0.729581	395.354	2269	917.73	72.1304	0.648923	413.453	2947.25	1289.09	0.142185	0.424436	0.551791	0.389953	0.45187	0.443507
	399.362	0.614508	416.347	2451.99	1190.81	57.7069	0.639465	455.214	2993.8	1358.34	0.129584	0.60985	0.461279	0.432243	0.448537	0.446108
	420.968	0.657893	462.346	2664.09	1212.07	64.1613	0.611616	417.741	2729.85	1311.56	0.134143	0.567644	0.461804	0.424354	0.464125	0.451882
	471.01	0.681379	426.536	2513.67	1089.86	76.4646	0.652611	450.562	2872.34	1274.33	0.138186	0.492703	0.487256	0.417816	0.477341	0.439436
	462.098	0.612563	426.924	2496.9	1216.67	78.8696	0.604676	443.092	2863.6	1385.8	0.146261	0.65369	0.453846	0.430672	0.449874	0.451227
	486.601	0.697766	432.519	2539.78	1072.61	73.5886	0.594468	498.452	2887.98	1458.18	0.135938	0.516928	0.506773	0.408688	0.452665	0.457524
	465.727	0.634959	428.037	2447.76	1158.91	77.5396	0.63439	461.437	2921.97	1349.39	0.138847	0.585003	0.47243	0.426663	0.454246	0.445671
	487.272	0.668687	376.126	2333.2	1017.88	79	0.61609	440.169	2812.01	1339.36	0.138066	0.542567	0.493182	0.418799	0.461565	0.45033
	429.075	0.657803	432.481	2531.09	1142.24	127.94	0.625318	440.295	2764.67	1304.4	0.217011	0.553667	0.466926	0.422542	0.467965	0.445321
	537.571	0.666482	402.881	2328.62	1042.37	72.381	0.638055	460.102	2835.82	1309.64	0.116877	0.528285	0.493235	0.420309	0.474653	0.444063
	379.917	0.635061	429.621	2611.07	1215.36	70.4259	0.610138	449.68	2936.36	1410.7	0.15823	0.606136	0.448737	0.427045	0.432897	0.452293
	480.664	0.675215	432.101	2546.51	1106.36	78.2109	0.610685	495.05	2845.78	1398.79	0.133927	0.545008	0.474576	0.417096	0.466794	0.453162
	469.853	0.695171	403.027	2412.78	1005.33	78.7277	0.613593	466.898	2834.53	1370.68	0.14071	0.500565	0.511023	0.411048	0.460625	0.448747
	394.183	0.632508	297.2	2284.29	1025.84	255.596	0.630776	432.14	2704.45	1265.81	0.342558	0.591692	0.446855	0.432072	0.483266	0.444736
	441.19	0.69991	412.979	2457.87	1013.65	65.6709	0.589348	493.054	3004.35	1517.74	0.132744	0.520657	0.505002	0.407877	0.4315	0.457485
	460.314	0.64632	442.856	2420.47	1139.35	62.8983	0.652311	406.061	2953.32	1285.32	0.122762	0.545029	0.478794	0.423034	0.448115	0.442878
	384.909	0.599276	451.394	2603.45	1296.89	67.0303	0.627364	374.68	2752.77	1256.95	0.148698	0.64629	0.436232	0.435578	0.455399	0.45105
	352.533	0.573331	391.256	2451.83	1265.52	87.0935	0.663061	397.485	2807.59	1196.94	0.19633	0.64863	0.430961	0.440613	0.476767	0.437842
	433.637	0.625563	385.581	2336.4	1108.4	83.4408	0.609271	424.297	2815.96	1348.38	0.162115	0.624563	0.466089	0.428171	0.459885	0.453026
	439.527	0.724218	408.374	2480.48	976.554	82.8458	0.628808	398.837	2893.35	1311.59	0.154613	0.441496	0.510558	0.404483	0.443443	0.447192
	400.875	0.539651	475.514	2575.13	1428.45	116.217	0.649115	373.055	2701.62	1182.19	0.223696	0.714652	0.422675	0.446045	0.476286	0.441847
	472.497	0.640704	423.73	2442.21	1140.43	78.0622	0.622205	417.541	2909.91	1351.25	0.144938	0.582921	0.473114	0.425158	0.442067	0.449973
	439.841	0.63102	421.039	2437.1	1158.31	106.808	0.626509	403.485	2654.32	1232.8	0.181736	0.597873	0.466173	0.427185	0.489097	0.446032
	454.527	0.610201	412.343	2496.4	1217.47	61.5275	0.629582	426.645	2886.04	1326.61	0.121814	0.622767	0.455849	0.432561	0.455094	0.452123
test_2021_07_30_14_12	505.494	0.745473	421.346	2436.42	932.5	78.1667	0.637372	460.779	2856.04	1303.9	0.137586	0.409378	0.54076	0.396677	0.470252	0.44288
test_2021_07_30_14_13	436.411	0.664118	425.121	2389.23	1069.74	80.8444	0.597557	444.158	2800.48	1365.19	0.15436	0.566629	0.497159	0.416337	0.456435	0.450989
	339.522	0.632392	378.172	2337.09	1093.77	84.3043	0.652037	366.886	2790.29	1202.5	0.172218	0.567962	0.467392	0.428081	0.467849	0.448126
test_2021_07_16_16_52	311.34	0.643762	398.296	2448.91	1103.71	55.1509	0.698248	544.959	2795.69	1214.39	0.162545	0.514099	0.493544	0.421249	0.529604	0.428897
test_2021_07_30_14_16	415.909	0.608115	424.283	2775.6	1332.08	106.939	0.596289	411.417	2851.5	1377.16	0.205777	0.66274	0.380148	0.430511	0.397712	0.442604
test_2021_07_30_14_17	404.357	0.648206	343.503	2459.2	1080.09	211.143	0.652477	420.67	2562.71	1147.9	0.339343	0.546263	0.450557	0.42912	0.474292	0.431828
	462.446	0.622684	515.631	2792.78	1366.52	72.3385	0.650348	423.764	3037.13	1233.15	0.134912	0.592982	0.439736	0.432308	0.457316	0.434435
	461.551	0.676184	487.997	2650.54	1181.12	83.6087	0.643559	408.202	2834.47	1214.53	0.156399	0.507018	0.477055	0.418313	0.45318	0.43367
	326.141	0.603929	406.28	2462.85	1213.12	112.975	0.621366	416.384	2583.92	1197.55	0.276438	0.650344	0.450531	0.434261	0.470615	0.437862
	415.495	0.647847	424.052	2541.17	1166.36	101.495	0.651618	434.475	2647.56	1185.71	0.186182	0.545184	0.462249	0.423255	0.465224	0.432132
	349.477	0.603837	421.195	2507.4	1233.07	79.1439	0.692677	408.238	2905.17	1117.66	0.190055	0.580548	0.435445	0.43267	0.462128	0.419622
	427.214	0.634932	426.019	2616.57	1217.18	76.8265	0.709906	366.074	2786.27	1054.64	0.154147	0.520735	0.444814	0.427428	0.4452	0.419565
	385.869	0.635205	393.11	2512.37	1156.74	144.135	0.641076	427.75	2620.3	1188.4	0.261082	0.577809	0.445909	0.428553	0.460086	0.434103
	399.342	0.63422	425.392	2609.85	1213.99	78.9829	0.646916	363.904	2678.96	1143.76	0.165009	0.582872	0.448156	0.428845	0.444798	0.432765
	436.406	0.683741	459.067	2590.53	1119.49	110.109	0.664965	534.433	2980.02	1289.58	0.179772	0.484475	0.488125	0.413616	0.463529	0.429854
	412.846	0.612209	444.561	2474.79	1221.05	72.4615	0.66355	379.444	2750.7	1163.07	0.147901	0.590458	0.439947	0.43258	0.444967	0.432073
	422.81	0.595535	450.976	2528.88	1275.36	82.6825	0.661746	524.613	3068.46	1339.53	0.161324	0.624346	0.452502	0.434463	0.444006	0.431308
	464.84	0.63898	466.273	2608.52	1226.31	81	0.670137	452.899	2867.44	1218.94	0.146719	0.550685	0.463944	0.426333	0.454133	0.429545
	476.486	0.688244	388.751	2398.71	1005.45	97.3194	0.66045	374.633	2703.27	1163.98	0.165819	0.479474	0.491491	0.412762	0.43869	0.4305
	404.147	0.62645	476.972	2655.17	1273.89	78.8966	0.644308	426.197	2817.41	1238.4	0.166468	0.588226	0.444574	0.428581	0.438848	0.434593
	419.11	0.593405	495.027	2636	1357.35	84.9266	0.651486	409.727	2660.62	1166.66	0.17003	0.63516	0.43443	0.435367	0.457253	0.429763
	476.458	0.700586	407.603	2464.48	1026.82	84.9821	0.666833	463.255	2887.77	1234.7	0.156759	0.457441	0.505253	0.407137	0.443503	0.428653
	476.527	0.623513	427.35	2419.07	1168.87	90.2568	0.628188	389.985	2838.09	1270.02	0.161731	0.614316	0.466832	0.428746	0.425327	0.438869
	444.924	0.605839	439.815	2489.18	1240.56	94.7619	0.661882	396.119	2638.04	1137.73	0.17365	0.603726	0.450026	0.433412	0.452653	0.431401
	464.188	0.630191	440.558	2463.27	1179.45	84.425	0.652731	450.897	2695.89	1188.76	0.159838	0.587513	0.467824	0.427295	0.455701	0.43332
	495.5	0.653802	423.831	2342.01	1081.39	110.146	0.693272	442.189	2911.68	1172.85	0.173526	0.504353	0.495629	0.421761	0.46743	0.419738
	534.25	0.649892	470.091	2472.08	1164.8	75.875	0.607098	421.694	2973.35	1382.49	0.119193	0.621194	0.479879	0.425259	0.399924	0.442272
	330.224	0.604566	345.843	2305.12	1114.96	216.298	0.610235	402.853	2709.08	1285.13	0.365155	0.663184	0.468545	0.432849	0.43117	0.442902
	448.667	0.650394	446.394	2592.6	1190.94	92.058	0.613121	389.256	2499.82	1191.36	0.167955	0.584797	0.463495	0.425368	0.470224	0.439921
	430.099	0.585815	478.375	2618.3	1352.19	83.8889	0.617553	373.254	2641	1218.46	0.165746	0.682798	0.427913	0.436482	0.439945	0.440206
	489.094	0.587595	468.691	2657.29	1371.99	90.5	0.622134	355.615	2513.33	1146.89	0.15857	0.675067	0.413071	0.435715	0.463112	0.43933
	471.333	0.686649	409.088	2517.66	1068.63	125.688	0.625076	413.822	2477.16	1161.9	0.207679	0.514462	0.49688	0.41352	0.475383	0.438384
	494.57	0.63623	422.62	2514.78	1175.96	120.547	0.649871	378.655	2755.83	1202.85	0.186328	0.561891	0.464679	0.42744	0.452102	0.434539
	482.362	0.697201	466.695	2676.81	1130.66	84.1724	0.672239	458.657	2894.1	1207.58	0.15043	0.457098	0.488257	0.413605	0.456693	0.428895
	497.346	0.673443	412.024	2416.88	1064.96	87.1154	0.63108	392.087	2578.08	1176.49	0.153476	0.521107	0.497336	0.419603	0.452298	0.439016
	462.25	0.675647	422.365	2583.9	1117.98	70.3125	0.715202	433.787	3250.5	1214.86	0.12844	0.458138	0.486144	0.420488	0.430221	0.413463
	423.406	0.58379	433.591	2505.02	1288.35	79.2323	0.672089	353.801	2635.16	1069.65	0.159059	0.632452	0.441578	0.437699	0.456417	0.428683
	425.51	0.668332	414.902	2519.82	1111.54	78.6562	0.622298	412.043	2728.86	1230.56	0.157118	0.545891	0.471512	0.420213	0.439018	0.437942
	436.785	0.727999	439.849	2663	1042.12	142.738	0.596575	385.526	2373.56	1169.52	0.231883	0.467873	0.508706	0.404654	0.474092	0.442509
	379.742	0.73577	392.895	2342.64	906.454	156.387	0.637901	427.982	2545.3	1172.74	0.289092	0.422634	0.549323	0.39543	0.482785	0.434687
	394.578	0.630508	311.107	2308.53	1047.4	234.741	0.634951	422.083	2726.94	1256.52	0.319439	0.590237	0.447525	0.432025	0.478148	0.444493
test_2021_07_30_14_21	468.748	0.678777	480.805	2694.63	1180.83	73.8992	0.674068	640.608	3746.58	1543.78	0.135064	0.49134	0.464109	0.418103	0.420428	0.426377
test_2021_07_30_14_23	458.932	0.679162	391.029	2457.72	1046.98	173.078	0.633777	526.574	3154.92	1393.28	0.235206	0.515224	0.48468	0.417259	0.449223	0.436691
	447.28	0.658418	456.472	2650.37	1198.64	81.0996	0.628217	515.609	3024.25	1402.58	0.153628	0.556795	0.463505	0.421819	0.430135	0.435507
	422.835	0.651661	452.252	2589.27	1187.82	79.3351	0.622073	506.267	3030.88	1428.49	0.156702	0.567814	0.457757	0.424806	0.435148	0.438489
	403.312	0.636812	539.238	2771.45	1338.72	70.3375	0.680159	595.259	3567.17	1482.2	0.14921	0.544549	0.459618	0.428851	0.424339	0.426009
	427.337	0.6143	469.505	2644.62	1299.32	72.7791	0.66333	571.511	3456.47	1474.77	0.144521	0.596892	0.447413	0.431503	0.433882	0.426316
	355.341	0.637166	564.527	2989.08	1426.86	64.5909	0.647411	570.363	3385.31	1508.43	0.152776	0.57262	0.432192	0.42902	0.417216	0.438299
	482.618	0.67147	401.426	2339.25	1031.76	78.8137	0.638347	507.669	3158.23	1445.18	0.13655	0.521449	0.508966	0.417744	0.42322	0.436591
	423.277	0.661043	451.82	2471.11	1128.6	68.0723	0.612297	550.036	3073.91	1438.48	0.139952	0.574158	0.485446	0.421143	0.455295	0.444335
	507.199	0.672256	433.118	2553.63	1120.91	89.7176	0.648222	552.658	3690.26	1463.31	0.144985	0.519638	0.479711	0.418652	0.433214	0.431463
	369.944	0.646652	466.645	2649.42	1227.08	84.4333	0.629934	511.835	3131.58	1445.37	0.184816	0.56664	0.463175	0.424048	0.429762	0.433744
	473.687	0.630052	422.388	2322.92	1116.16	113.835	0.659825	521.287	3137	1358.58	0.169509	0.577837	0.481276	0.426227	0.452157	0.432692
	475.731	0.660581	449.882	2447.25	1116.42	77.5224	0.629267	467.396	2927.22	1343.94	0.138354	0.552176	0.479565	0.419789	0.440717	0.43544
	440.57	0.630199	484.689	2549.53	1238.41	82.385	0.647474	546.827	3150.9	1408.21	0.154513	0.590627	0.461427	0.428363	0.435245	0.432689
	418.789	0.672798	427.516	2559.68	1113.91	76.8778	0.656158	486.885	3060.51	1345.71	0.152655	0.50717	0.475492	0.418813	0.429263	0.431974
	420.137	0.652524	487.177	2502	1180.3	75.4314	0.653456	514.275	3447.92	1439.69	0.149284	0.546345	0.477825	0.424307	0.423617	0.430232
	429.578	0.679414	428.328	2385.22	1044.45	71.8944	0.677871	546.534	3282.17	1394.69	0.14531	0.477979	0.503411	0.412823	0.437355	0.426931
	395.879	0.634982	449.101	2550.24	1208.85	70.1589	0.689906	537.318	3194.75	1328.98	0.15438	0.550409	0.461803	0.427345	0.450715	0.41946
	427.552	0.647747	431.606	2505.24	1151.16	80.0207	0.645744	533.028	2984.53	1353.55	0.159308	0.561056	0.465133	0.424126	0.450726	0.430315
	491.509	0.610934	534.988	2940.23	1459.38	78.9649	0.635663	512.486	3105.02	1391.9	0.138711	0.627679	0.413339	0.4321	0.442966	0.43582
test_2021_07_30_14_16	372.857	0.656515	477.949	2720.77	1236.65	73.7778	0.700223	585.719	3518.15	1415.68	0.169259	0.500094	0.460198	0.42286	0.435093	0.423147
test_2021_07_30_14_17	423.326	0.640892	453.906	2617	1221.64	77.383	0.622526	516.653	2966.29	1392.93	0.156794	0.596076	0.461131	0.426391	0.431465	0.438909
	403.414	0.62872	539.312	2819.37	1374.55	68.8621	0.588662	538.477	3083.19	1550.08	0.143356	0.649993	0.447949	0.431136	0.423948	0.443401
	378.191	0.718909	424.554	2576.04	1028.61	82.9551	0.667252	538.454	3150	1367.17	0.175032	0.428267	0.502125	0.406358	0.425596	0.428299
	467.331	0.606128	443.596	2520.19	1258.09	85.6612	0.649733	493.731	3500.29	1433.97	0.150001	0.615017	0.454691	0.434813	0.420317	0.434143
	401.436	0.733221	424.056	2480.52	976.444	115.203	0.648571	554.07	3342.63	1498.18	0.205155	0.418758	0.531687	0.399093	0.423731	0.431141
	448.206	0.681438	437.404	2595.38	1119.92	79.6459	0.629851	543.761	3125	1434.62	0.151746	0.523543	0.471493	0.416913	0.439364	0.436332
	396.313	0.643419	475.63	2700.88	1261.38	78.5	0.68068	535.21	4020.29	1388.22	0.164109	0.537401	0.446584	0.426817	0.442344	0.422181
	403.972	0.690049	415.174	2527.74	1057.37	73.1818	0.650187	505.48	3114.87	1349.65	0.153396	0.486801	0.494164	0.412838	0.435274	0.429289
	371.014	0.667799	450.95	2480.07	1116.6	76.4621	0.659314	394.834	2652.33	1146.31	0.172492	0.513374	0.485181	0.418058	0.456201	0.430049
	483.282	0.597521	464.206	2750.69	1375.24	81.1955	0.640584	498.043	2944.18	1339.05	0.145374	0.646064	0.412311	0.435111	0.452193	0.433798
	397.618	0.644603	406.807	2420.44	1113.85	122.544	0.666041	492.335	3172.17	1359.97	0.200437	0.542695	0.46544	0.421027	0.431093	0.425921
	490.034	0.670245	463.968	2707.91	1195.1	102.933	0.659	477.03	3188.31	1325.35	0.16841	0.509875	0.451837	0.420621	0.430831	0.429564
	383.606	0.640506	452.106	2722.23	1257.54	112.683	0.651731	505.001	3253.87	1346.29	0.244739	0.560703	0.442319	0.426661	0.441738	0.432589
	389.698	0.655543	466.95	2588.24	1187.22	72.873	0.668725	544.134	3177.69	1368.2	0.160502	0.527266	0.473403	0.423134	0.447212	0.429068
	422.415	0.612752	472.035	2668.12	1324.27	80.2258	0.657281	454.838	2984.05	1275.49	0.158126	0.601175	0.428576	0.430248	0.44221	0.431358
	430.462	0.647859	500.112	2720.18	1273.33	78.1538	0.670902	551.315	3386.27	1463.92	0.149968	0.530867	0.465304	0.425501	0.425176	0.427218
	405.44	0.687356	442.609	2572.34	1100.43	73.1844	0.68126	492.22	3063.88	1264.25	0.153638	0.472642	0.48925	0.412917	0.45001	0.424802
	393	0.638326	415.193	2534.4	1175.81	76.5973	0.674447	467.379	3013.95	1254.61	0.163762	0.543127	0.462219	0.427303	0.440712	0.427389
	434.97	0.601827	533.103	2787.39	1414.6	106.134	0.638164	421.581	2622.19	1191.75	0.199315	0.632054	0.432533	0.434061	0.452334	0.433511
	460.329	0.634153	440.364	2464.27	1171.17	84.9726	0.656914	453.037	2743.52	1184.8	0.162231	0.57766	0.468702	0.426243	0.457425	0.432018
	478.097	0.620942	426.022	2416	1172.24	90.6759	0.626419	384.004	2798.75	1255.92	0.161455	0.620817	0.466054	0.429237	0.426899	0.439389
	437.569	0.603364	443.049	2481.31	1241.11	89.125	0.653496	373.522	2585.34	1126.82	0.171303	0.61444	0.450789	0.433469	0.453724	0.433383
	463.58	0.673496	415.897	2482.99	1090.7	87.4493	0.655747	544.51	3192.31	1385.06	0.159278	0.514045	0.484978	0.418755	0.428996	0.43248
	489.398	0.647258	418.675	2355.73	1097.91	107.656	0.660564	430.068	2779.95	1195.2	0.17252	0.544974	0.486117	0.423539	0.455059	0.428439
	494.333	0.650134	451.45	2502.94	1163.94	75.3889	0.641918	476.754	3188.99	1419.34	0.134752	0.567493	0.473821	0.425329	0.406851	0.43478
	327.704	0.604505	345.812	2310.72	1116.15	217.085	0.610006	402.417	2695	1280.7	0.366858	0.663702	0.467649	0.433065	0.43231	0.443017
	447.194	0.650718	445.823	2598.52	1191.83	91.2985	0.611539	392.194	2504.74	1197.87	0.167081	0.586096	0.463424	0.425343	0.469773	0.439997
	427.988	0.585273	478.926	2615.57	1352.45	83.575	0.613949	374.291	2638.74	1226.71	0.165786	0.687482	0.427713	0.43661	0.439463	0.441046
	490.069	0.588706	468.381	2654.64	1368.46	91.0534	0.624972	354.128	2512.96	1139.74	0.15919	0.670223	0.414112	0.435497	0.463569	0.438793
	433.062	0.720638	401.984	2423.79	973.437	76.7708	0.645409	447.155	2746.71	1231.13	0.156271	0.434374	0.532488	0.398446	0.449882	0.434398
	638.502	0.799826	376.123	2156.95	740.521	110.527	0.644988	444.192	2747.35	1209.93	0.146344	0.315493	0.620971	0.364211	0.469428	0.432931
	462.301	0.656786	440.189	2671.96	1196.46	89.9295	0.665563	402.514	2696.07	1127.2	0.164723	0.527565	0.458257	0.42315	0.464986	0.427961
	461.639	0.678432	449.105	2539.46	1111.37	92.3889	0.64551	402.786	2770.6	1195.17	0.165371	0.520698	0.483228	0.41754	0.445009	0.432789
	482.523	0.691619	420.085	2478.67	1045.6	85.0625	0.633016	410.937	2748.91	1237.38	0.152895	0.500505	0.498249	0.412521	0.435669	0.439173
	458.645	0.661769	409.333	2534.27	1122.55	145.529	0.616791	412.653	2383.55	1146.68	0.233136	0.561059	0.474462	0.422407	0.479609	0.438821
	495.351	0.63507	420.828	2509.16	1175.98	119.404	0.651959	381.398	2783.26	1203.03	0.185025	0.56243	0.46462	0.42764	0.452052	0.434377
	479.484	0.69689	466.384	2662.32	1126.92	84.0781	0.672956	470.806	3006.64	1233.81	0.150708	0.458439	0.488766	0.413568	0.453964	0.428094
	485.842	0.673628	416.098	2491.25	1089.93	77.9211	0.668669	409.523	2864.96	1190.87	0.139825	0.493314	0.491929	0.420162	0.441313	0.427892
	471.944	0.58661	445.544	2568.94	1314.59	91.9145	0.660516	361.572	2556.13	1074.91	0.161071	0.638458	0.436265	0.437406	0.466352	0.429871
	420.862	0.599029	437.869	2507.79	1259.39	77.6897	0.678417	404.745	2784.99	1153.82	0.157991	0.594293	0.444192	0.433395	0.434137	0.431238
	426.289	0.671812	412.331	2498.9	1094.68	79.7778	0.619064	406.669	2700.1	1223.7	0.159055	0.54372	0.474381	0.419395	0.439712	0.438356
	455.573	0.664603	419.435	2518.83	1113.38	165.669	0.627294	388.556	2454.22	1136.56	0.252008	0.546005	0.46812	0.420901	0.470366	0.436739
	366.735	0.684119	385.936	2310.78	989.655	89.2647	0.640944	347.491	2329.33	1027.08	0.197316	0.497991	0.516677	0.414067	0.473035	0.431611
	443.433	0.724451	445.478	2666.08	1054.69	131.717	0.585015	376.149	2354.83	1181.31	0.213809	0.483083	0.505093	0.40586	0.466427	0.44489
	378.323	0.736096	394.691	2364.36	912.894	157.835	0.642377	431.343	2560.26	1171.03	0.290881	0.418211	0.547219	0.395801	0.483932	0.433679
test_2021_07_30_14_21	420.789	0.663393	370.98	2443.32	1060.38	235.408	0.633845	519.735	2798.42	1342.77	0.300778	0.535288	0.470758	0.42199	0.460175	0.437607
test_2021_07_30_14_23	469.591	0.683307	478.972	2699.06	1170.64	72.5545	0.680423	652.299	3817.84	1558.51	0.13294	0.476942	0.465414	0.417082	0.420115	0.425462
	336.115	0.623227	427.304	2450.21	1180.08	153.625	0.630986	539.161	3053.97	1448.87	0.333874	0.610433	0.454713	0.429161	0.440234	0.434859
	417.02	0.66538	449.722	2616.59	1168.86	66.6939	0.678221	528.747	3612.28	1467.08	0.137565	0.499065	0.460517	0.420714	0.423208	0.423256
	432.452	0.644244	464.908	2654.68	1236.83	78.1705	0.631283	508.578	3013.64	1392.72	0.153495	0.576867	0.454668	0.425504	0.428172	0.435602
	381.207	0.675889	423.605	2639.52	1135.74	105.22	0.678588	546.577	3464.52	1397.74	0.213265	0.489987	0.476888	0.420085	0.448531	0.426596
	422.339	0.648628	449.969	2578.59	1189.13	80.506	0.620344	522.995	3051.45	1451.74	0.158792	0.574458	0.457891	0.425382	0.433313	0.438795
	405.939	0.638965	530.345	2750.43	1320.57	71.5354	0.672603	577.502	3467.69	1465.42	0.150048	0.547488	0.460754	0.428404	0.42699	0.428473
	428.769	0.583974	492.748	2700.71	1400.24	77.3846	0.637215	540.862	3102.23	1406.26	0.152709	0.669334	0.435226	0.438258	0.450132	0.432141
	540.893	0.705206	419.705	2480.96	1020.45	86.3202	0.638098	548.656	3606.75	1479.61	0.135905	0.474668	0.50667	0.409313	0.428479	0.432118
	349.22	0.638221	549.068	3000.64	1416.46	60.3659	0.64765	582.651	3403.24	1522.2	0.147508	0.570438	0.429314	0.428269	0.414346	0.437407
	414.5	0.657909	446.589	2441.71	1119.99	68.5	0.616309	566.703	3119.07	1447.62	0.143502	0.576724	0.487689	0.42115	0.458019	0.44366
	482.993	0.671382	438.573	2608.15	1142.86	91.4503	0.645407	556.773	3740.96	1467.57	0.151396	0.523816	0.472481	0.418924	0.433594	0.432741
	493.235	0.664444	406.584	2256.68	1018.66	81.3951	0.619416	511.172	3050.17	1457.34	0.137956	0.548785	0.513821	0.417607	0.423674	0.441343
	377.294	0.6503	477.732	2655.42	1229.33	85.3176	0.628661	507.293	3122.55	1440.72	0.183835	0.562406	0.464867	0.42355	0.428377	0.434268
	465.413	0.626211	417.164	2321.71	1121.23	118.635	0.670241	509.187	3096.5	1318.27	0.17773	0.565841	0.475791	0.427224	0.458626	0.429811
	471.775	0.664359	442.612	2473.19	1112.86	75.3314	0.630305	470.815	2950.3	1351.15	0.136349	0.545028	0.478858	0.41947	0.442028	0.435775
	487.8	0.648994	411.197	2420.29	1117.5	65.2	0.538852	414.65	2771.15	1494.17	0.116279	0.659242	0.489025	0.424635	0.420499	0.456715
	483.03	0.631871	476.264	2664.02	1276.82	88.806	0.648721	579.119	3166.22	1429.69	0.150196	0.584688	0.458744	0.429049	0.452004	0.436428
	410.767	0.667816	430.901	2491.6	1105.81	75.1	0.652276	487.102	3030.89	1347.88	0.15173	0.517475	0.484843	0.420244	0.431347	0.432561
	414.795	0.6412	484.363	2469.42	1187.69	77.375	0.644609	508.166	3432.44	1430.74	0.153884	0.578882	0.475308	0.425921	0.421268	0.430727
	439.24	0.686534	431.999	2398.35	1036.79	71.3636	0.676086	557.182	3320.39	1417.25	0.141199	0.469415	0.505599	0.411131	0.436111	0.427256
	375.756	0.634323	451.855	2580.51	1220.19	71.9359	0.707691	525.295	3351.5	1328.12	0.164484	0.531351	0.459924	0.427686	0.442817	0.415042
	440.09	0.64179	463.148	2450.88	1170.9	80.8315	0.649771	475.275	2984.23	1319.71	0.151952	0.562164	0.472471	0.426316	0.438305	0.431973
	445.824	0.657038	433.115	2554.16	1149.51	83.1862	0.629783	532.674	2926.5	1361.82	0.15937	0.565264	0.463814	0.422115	0.446895	0.434789
	459.575	0.629683	474.507	2596.87	1261.44	64.15	0.628309	532.614	2837.23	1364.09	0.122668	0.62284	0.456708	0.428904	0.454549	0.436339
	476.267	0.6117	526.33	2895.47	1433.98	76	0.62742	522.15	3063.35	1416.08	0.137617	0.632674	0.419867	0.431987	0.441437	0.43823
	369.607	0.659423	478.559	2730.48	1234.63	73.2623	0.698732	582.92	3500.58	1411.84	0.169532	0.497457	0.460825	0.422342	0.435303	0.423737
	408.533	0.624334	535.278	2773.83	1363.57	71.2333	0.610435	553.593	3187.53	1544.72	0.146017	0.630274	0.449506	0.43178	0.423326	0.438991
	464.727	0.606999	443.356	2522.41	1256.77	83.1322	0.650277	491.669	3503.12	1432.18	0.148487	0.613307	0.455029	0.434668	0.419409	0.434133
	377.515	0.720513	420.704	2544.94	1015.57	85.8144	0.663262	541.183	3171.5	1383.81	0.178521	0.43131	0.506302	0.405025	0.425535	0.428486
	396.587	0.741599	423.421	2479.99	958.21	115.967	0.648305	560.938	3353.61	1505.52	0.206674	0.406348	0.53711	0.396787	0.423183	0.431191
	430.42	0.669444	435.788	2593.87	1143.68	78.5725	0.638849	530.832	3121.44	1408.79	0.155732	0.53306	0.468692	0.419839	0.437008	0.434048
	402.561	0.642871	473.701	2698.57	1260.21	80.8243	0.677629	528.396	3934.84	1387.95	0.165599	0.539597	0.447593	0.427053	0.441341	0.423294
	417.133	0.706339	415.217	2536.07	1028.6	74.7979	0.646933	519.627	3198.43	1387.02	0.149743	0.465001	0.503625	0.409087	0.43317	0.430608
	367.681	0.646093	413.041	2503.55	1133.44	72.9275	0.66001	460.045	2882.94	1243.46	0.168121	0.544426	0.469144	0.422924	0.441137	0.425797
	371.877	0.667924	451.218	2477.42	1115.7	75.9041	0.659703	396.663	2659.13	1149	0.171468	0.51279	0.485487	0.417998	0.456164	0.430002
	422.771	0.650052	482.902	2649.01	1227.99	74.3373	0.637644	437.44	2909.86	1305.96	0.153315	0.565345	0.458974	0.423131	0.431174	0.437823
	472.99	0.596382	458.246	2735.51	1369.98	79.0291	0.647179	515.321	3015.77	1357.85	0.144618	0.642553	0.412255	0.435433	0.449434	0.43191
	399.729	0.646925	406.581	2431.22	1112.08	122.514	0.667278	485.575	3150	1345.74	0.200911	0.538083	0.46552	0.420528	0.432228	0.425901
	409.125	0.647915	454.96	2715.58	1240.66	111.225	0.653363	507.023	3274.06	1354.59	0.227174	0.548598	0.444982	0.425126	0.437859	0.432139
	470.087	0.596182	460.2	2796.81	1403.5	88.5665	0.632388	433.889	2762.66	1255	0.156526	0.648933	0.398506	0.43314	0.447632	0.435886
	395	0.653958	468.899	2598.02	1196.16	71.1603	0.667159	526.171	3111.54	1347.08	0.156819	0.52989	0.471202	0.423726	0.448449	0.428502
	396.252	0.634999	486.182	2528.12	1219.67	69.6396	0.671686	459.599	3109.6	1284.95	0.151853	0.553601	0.469899	0.427649	0.445646	0.429878
	430.462	0.647859	500.112	2720.18	1273.33	78.1538	0.670902	551.315	3386.27	1463.92	0.149968	0.530867	0.465304	0.425501	0.425176	0.427218
	391.318	0.70352	436.936	2543.72	1052.14	73.5727	0.695175	503.686	3158.92	1266.01	0.159005	0.436382	0.50256	0.408253	0.44925	0.421544
	392.3	0.638087	413.528	2521.61	1169.23	78.4444	0.677146	482.013	3037.8	1260.68	0.166891	0.54236	0.463184	0.427391	0.4419	0.425991
	434.97	0.601827	533.103	2787.39	1414.6	106.134	0.638164	421.581	2622.19	1191.75	0.199315	0.632054	0.432533	0.434061	0.452334	0.433511

## Sheet: No Glucose
Unnamed: 0	NADH.Intensity	NADH.a1	NADH.t1	NADH.t2	NADH.FLIM	FAD.Intensity	FAD.a1	FAD.t1	FAD.t2	FAD.FLIM	Redox.Ratio	FLIRR	NADH.G	NADH.S	FAD.G	FAD.S
test_2021_07_11_16_30	218.265	0.729377	390.301	2624.63	984.43	20.4286	0.642317	598.806	3245.53	1380.43	0.0961281	0.458912	0.493172	0.40233	0.368201	0.43463
test_2021_07_11_16_32	210.921	0.72149	335.659	2439.42	913.162	16.2105	0.742439	419.435	3567.34	1109.89	0.0753182	0.383629	0.497199	0.405532	0.401878	0.415725
	291.737	0.687673	368.695	2517.37	1036.19	21.5066	0.680183	530.317	3201.31	1313.14	0.0706635	0.475094	0.469645	0.416119	0.36553	0.453171
	331.762	0.673329	320.71	2309.84	964.828	30.9109	0.668047	489.553	4096.14	1491.83	0.0853627	0.498549	0.492085	0.419471	0.37798	0.436615
	317.955	0.68402	336.556	2394.62	982.145	32.6494	0.647664	499.405	3651.88	1425.01	0.0945087	0.505426	0.48477	0.41658	0.378641	0.442164
	229.222	0.702937	339.774	2473.22	966.358	20.9603	0.690459	465.259	2965.38	1141.12	0.0880594	0.44864	0.484159	0.412001	0.41664	0.436835
	265.692	0.755537	273.862	2167.73	754.497	82.5123	0.726476	371.032	2434.31	892.651	0.167124	0.358708	0.543367	0.383329	0.50267	0.407859
	212.433	0.625901	346.266	2610.18	1178.02	32.1023	0.622479	510.774	3182.58	1431.9	0.134118	0.627643	0.412052	0.431705	0.380596	0.452499
	197.807	0.651448	337.612	2730.36	1160.14	26.7311	0.59497	864.894	3765.57	1736.5	0.12274	0.617596	0.411137	0.426942	0.360425	0.455922
	310.059	0.726429	320.818	2240.51	843.024	25.3514	0.642281	631.127	3748.21	1538.56	0.0769638	0.444822	0.528994	0.399722	0.374014	0.445858
	330.007	0.679341	318.185	2285.12	943.406	29.88	0.668726	450.116	3227.5	1295.3	0.0828477	0.490697	0.487824	0.417343	0.387746	0.439689
	296.601	0.740119	314.135	2186.92	803.207	28.068	0.660344	503.894	3389.72	1344.36	0.0862091	0.41079	0.550822	0.393276	0.375003	0.439881
	398.233	0.719882	293.609	2149.15	809.703	36.8493	0.665539	405.156	3533.69	1263.1	0.0856757	0.432211	0.530808	0.402825	0.381188	0.440932
	347.36	0.712338	319.217	2299.31	886.906	26.2	0.693026	444.82	3343.39	1267.85	0.070237	0.424499	0.508525	0.408487	0.392623	0.444274
	340.215	0.721856	336.35	2405.73	908.108	37.8834	0.603986	506.702	3010.93	1432.14	0.0986688	0.47808	0.509814	0.405625	0.381696	0.459752
	324.435	0.707086	335.164	2377.76	928.21	45.2427	0.620642	504.101	3125.61	1411.99	0.121568	0.489486	0.501004	0.409168	0.361469	0.452276
	251.838	0.722394	293.79	2240.22	827.247	45.197	0.630716	427.86	2692.19	1214.79	0.143046	0.453945	0.50912	0.404082	0.404873	0.453737
	377.861	0.70248	321.727	2272.57	896.929	68.8606	0.66027	333.29	2501.57	1047.76	0.149852	0.458019	0.503073	0.410032	0.456183	0.440235
	388.578	0.758324	311.583	2194.63	768.103	48.8329	0.711498	389.212	2754.94	1030.53	0.111161	0.3492	0.5555	0.387286	0.459587	0.425509
	361.684	0.705961	331.645	2300.64	913.729	40.0111	0.683285	467.142	3324.91	1254.69	0.100956	0.452386	0.51338	0.4053	0.411745	0.43505
	332.759	0.717983	311.753	2318.95	874.908	29.6786	0.670088	430.293	3013.71	1208.95	0.0826059	0.43711	0.510505	0.405287	0.391756	0.447548
	313.576	0.686073	322.413	2421.28	977.851	31.3571	0.627598	416.21	2524.29	1148.99	0.0923191	0.523121	0.487207	0.417395	0.410118	0.454659
	318.532	0.769275	308.62	2186.35	746.183	31.0922	0.687575	353.003	2903.02	1099.09	0.0885785	0.344723	0.565817	0.379548	0.404578	0.438875
test_2021_07_11_16_35	422.464	0.78152	334.117	2177.77	733.434	35.6145	0.70385	439.314	2779.4	1081.66	0.0786973	0.322243	0.581232	0.377639	0.472774	0.424566
test_2021_07_11_16_36	255.704	0.707543	351.057	2299.69	917.237	26.1481	0.654461	426.017	3045.09	1244.47	0.0929872	0.463446	0.514479	0.406042	0.390422	0.439823
	273.75	0.771134	337.886	2258.23	771.277	23.6853	0.718208	482.98	3600.2	1203.35	0.0792594	0.329556	0.56496	0.383551	0.418135	0.416655
	272.665	0.688294	312.447	2189.95	888.717	32.6548	0.648844	450.675	3282.9	1334.81	0.106	0.502067	0.513301	0.410234	0.407046	0.437914
	216.172	0.74485	374.529	2424.67	884.851	23.9258	0.682055	445.621	3317.64	1269.04	0.0981299	0.386497	0.531313	0.393771	0.410406	0.425939
	209.103	0.732987	395.333	2611.91	971.629	21.7397	0.701961	539.556	3840.96	1288.88	0.0923694	0.400088	0.500887	0.399927	0.403472	0.420519
	358.552	0.745113	345.66	2169.78	806.429	31.2985	0.669638	531.254	4048.54	1373.4	0.0784709	0.394438	0.554269	0.391929	0.379232	0.431996
	211.583	0.670708	352.872	2586.94	1047.84	31.9688	0.649938	474.294	3360.63	1348.64	0.156734	0.525014	0.475609	0.418557	0.397271	0.434092
	240.906	0.69442	347.387	2541.19	1024.23	40.8564	0.639024	486.569	3070.1	1344.94	0.158004	0.500087	0.465603	0.40954	0.392827	0.443259
	251.355	0.686904	301.541	2295.46	925.097	46.9915	0.646088	365.166	3055.92	1151.56	0.183796	0.504509	0.46987	0.414708	0.413953	0.441022
	211.065	0.699666	334.359	2613.82	1013.82	41.3676	0.653995	528.36	3188.07	1349.04	0.149248	0.479197	0.452237	0.413347	0.363164	0.439625
	209.415	0.741939	388.257	2501.49	923.166	21.6798	0.671995	504.527	3973.6	1394.62	0.0944523	0.404591	0.519624	0.395669	0.374767	0.428548
	285.412	0.726379	353.154	2369.92	899.649	32.0137	0.627057	539.504	3384.81	1486.91	0.101452	0.451163	0.523275	0.398712	0.383872	0.44293
	251.08	0.629731	332.506	2395.84	1089.3	42.4887	0.65062	477.067	3029.39	1282.67	0.145555	0.586143	0.448007	0.429742	0.414424	0.436119
	230.916	0.690111	391.346	2597.43	1058.04	27.1683	0.62835	515.665	3613.57	1468.96	0.110085	0.521499	0.46911	0.413546	0.362073	0.433981
	258.324	0.661653	341.251	2360.66	1008.45	35.5221	0.673095	403.373	3095.3	1192.56	0.119548	0.518083	0.469888	0.4195	0.394415	0.435174
	302.235	0.689226	371.742	2406.62	993.657	40.3716	0.667203	373.292	2861.08	1146.97	0.118215	0.479574	0.487797	0.413515	0.41428	0.437383
	357.48	0.799462	334.671	2098.82	688.429	35.0461	0.657994	512.088	3047.73	1304.26	0.0884447	0.312878	0.617241	0.361184	0.408401	0.435462
	340.225	0.816914	336.16	2115.28	658.827	33.2208	0.646828	462.754	3263.41	1313.41	0.087873	0.295649	0.62812	0.356073	0.400062	0.437317
	207.855	0.691283	392.592	2559.17	1043.13	21.3969	0.705468	474.067	3912.71	1322.15	0.0955405	0.458061	0.470222	0.412376	0.379519	0.418693
	236.475	0.686056	363.821	2380.47	982.159	33.4302	0.657332	477.543	3406.87	1283.87	0.127385	0.49479	0.49498	0.412458	0.40781	0.440698
	168.024	0.684491	345.907	2307.23	941.772	26.0597	0.657901	507.94	3994.53	1440.63	0.201783	0.501174	0.498502	0.41365	0.355603	0.440549
test_2021_07_11_16_40	249.801	0.763819	358.106	2381.98	821.604	25.8007	0.656099	523.409	3530.1	1357.45	0.0953716	0.377789	0.552224	0.385164	0.414052	0.442805
test_2021_07_11_16_42	159.252	0.777541	346.052	2404.55	792.556	19.699	0.680572	576.616	3999.12	1461.59	0.121619	0.339814	0.558625	0.380315	0.367645	0.429427
	221.655	0.717983	333.336	2232.77	852.759	21.4315	0.69704	656.674	4297.05	1507.25	0.0942153	0.417151	0.529825	0.39756	0.381784	0.432858
	127.786	0.68497	374.752	2678.62	1069.34	18.2419	0.719072	481.698	3793.84	1210.43	0.127644	0.455505	0.450873	0.415488	0.42663	0.425842
	233.566	0.730411	326.487	2149.75	808.515	34.5447	0.645461	558.63	3067.63	1292.24	0.128599	0.443161	0.535387	0.395358	0.415629	0.443475
	242.751	0.750292	336.058	2333.2	822.512	30.2742	0.645997	562.441	3601.88	1463.2	0.11306	0.403392	0.537644	0.39097	0.381157	0.443544
	250.406	0.705083	355.543	2434.23	958.46	47.9278	0.688107	472.783	3268.12	1227.3	0.143592	0.445725	0.49481	0.408474	0.432917	0.433083
	158.63	0.769449	362.785	2417.4	812.792	22.4327	0.701651	469.027	3595.1	1244.37	0.126356	0.337339	0.54958	0.380726	0.378756	0.424909
	181.007	0.743888	355.096	2402.67	869.266	24.1773	0.682624	429.796	3667.65	1221.25	0.122024	0.387471	0.519564	0.395262	0.376347	0.433865
	221.945	0.760611	329.888	2332.24	802.19	31.8207	0.691285	453.538	3069.4	1175.16	0.126428	0.362187	0.546197	0.386982	0.407486	0.433528
	202.577	0.752089	343.365	2254.16	806.473	31.8834	0.639614	525.471	3427.79	1487.27	0.143299	0.399478	0.556573	0.387592	0.352179	0.450975
	253.76	0.751503	348.402	2441.45	860.19	32.6146	0.676761	404.611	3096.69	1195.71	0.11287	0.378232	0.535392	0.394553	0.409796	0.435064
	306.896	0.625217	367.752	2666	1213.6	95.224	0.608931	395.237	2632.73	1244.33	0.237394	0.627794	0.420497	0.430942	0.42231	0.450217
	244.342	0.641135	367.075	2419.47	1087.61	29.8224	0.694953	355.345	3192.1	1144.91	0.110378	0.529229	0.451947	0.424943	0.381251	0.442213
	245.32	0.699958	359.982	2317.35	926.245	28.9335	0.667968	398.227	2947.41	1188.26	0.107343	0.459408	0.506884	0.406568	0.400596	0.44465
	262.067	0.72831	350.132	2554.94	932.094	31.0843	0.636984	503.395	3225.04	1353.08	0.104934	0.445491	0.500689	0.402834	0.394858	0.447515
	225.439	0.669281	333.661	2277.16	966.762	33.5087	0.620114	630.5	3720	1613.22	0.133945	0.554406	0.490482	0.417067	0.342301	0.45209
	262.582	0.704138	341.513	2353.87	930.112	35.1148	0.658167	581.497	3192.98	1355.9	0.119439	0.467835	0.499225	0.409522	0.392756	0.440023
	326.572	0.796021	342.742	2225.88	719.885	33.9694	0.640104	463.225	3127.12	1360.51	0.0918524	0.327789	0.592405	0.367993	0.372394	0.450173
	206.775	0.761935	349.078	2439.8	826.987	23.525	0.693484	541.125	4092.35	1345.33	0.109668	0.359233	0.546885	0.386886	0.376748	0.429691
	213.255	0.716339	363.318	2398.7	921.84	42.4428	0.681531	460.513	3200.93	1232.25	0.163613	0.42753	0.515637	0.40418	0.399669	0.43823
test_2021_07_11_16_44	257.398	0.701214	304.153	2286.53	891.129	39.8652	0.612501	554.666	4067.38	1643.48	0.135959	0.509498	0.489501	0.41196	0.385822	0.44195
test_2021_07_11_16_46	254.558	0.708157	295.756	2245.44	859.201	38.8069	0.661909	628.077	4124.9	1520.07	0.123683	0.459053	0.504216	0.408604	0.403026	0.433153
	245.562	0.694101	310.739	2270.37	904.521	39.9938	0.675604	551.312	3758.11	1477.69	0.133838	0.474685	0.496654	0.41376	0.388841	0.426931
	283.732	0.670793	333.446	2435.61	1020.33	32.1527	0.627355	573.499	3579.47	1483.34	0.101945	0.549138	0.461848	0.421086	0.396827	0.44123
	279.239	0.696666	298.312	2260.72	888.659	44.4756	0.672017	516.762	3391.05	1354.39	0.133354	0.463813	0.492492	0.413999	0.422333	0.428226
	218.631	0.689847	297.066	2333.55	922.719	25.888	0.645102	698.654	4615.4	1680.14	0.109233	0.505432	0.481018	0.415772	0.386282	0.438816
	282.922	0.674838	282.733	2272.68	925.645	50.4216	0.650329	515.761	3682.55	1381.21	0.152237	0.516416	0.46777	0.420993	0.432095	0.43389
	272.504	0.715688	290.114	2168.11	821.147	30.0787	0.697998	517.786	3340.69	1284.29	0.100878	0.421924	0.520807	0.405091	0.426954	0.423516
	229.071	0.681378	325.765	2307.98	947.629	24.7367	0.628703	671.342	4295.33	1699.78	0.10609	0.534973	0.489415	0.416176	0.341108	0.446681
	226.142	0.69176	312.381	2340.7	928.077	27.4976	0.640907	553.648	3577.55	1545.85	0.112349	0.496518	0.482957	0.414017	0.36986	0.439019
	174.403	0.695333	331.848	2405.65	958.278	20.1509	0.648749	610.915	4181.96	1687.35	0.112352	0.491384	0.483028	0.414006	0.349915	0.434439
	246.631	0.72515	315.249	2274.07	850.157	27.4463	0.634051	711.933	4253.01	1638.63	0.102751	0.45675	0.522235	0.400989	0.383534	0.441307
	270.152	0.692932	307.806	2211.36	886.174	36.3773	0.628804	561.647	3981.61	1548.1	0.119596	0.506581	0.505735	0.411136	0.391676	0.439839
test_2021_07_11_16_48	98.4286	0.679866	348.028	2621.44	1047.19	13	0.720945	357.651	3546.85	1154.77	0.1253	0.450518	0.460629	0.415839	0.374845	0.421724
test_2021_07_11_16_50	289.366	0.738214	307.85	2106.9	775.324	31.7453	0.672705	442.538	3066.56	1181.52	0.0985177	0.401805	0.560096	0.392203	0.437702	0.42947
	146.069	0.645528	374.198	2777.09	1206.92	18.2487	0.692172	687.036	4274.27	1487.74	0.119169	0.536553	0.430014	0.425814	0.371455	0.420733
	222.574	0.759509	342.656	2548.17	864.336	30.497	0.647203	591.537	3945.49	1539.09	0.121184	0.390848	0.516964	0.393009	0.372688	0.436224
	215.609	0.718907	303.233	2260.05	843.307	38.9916	0.646427	425.294	3392.83	1307.94	0.161048	0.452153	0.508414	0.40548	0.390509	0.435023
	232.827	0.760002	322.148	2298.2	787.662	25.2374	0.691545	514.847	3661.99	1311.81	0.0971709	0.362195	0.546692	0.386737	0.406361	0.425027
	308.049	0.770579	312.178	2112.87	721.344	39.6913	0.670104	489.727	3190.84	1285.46	0.111704	0.356518	0.578943	0.3773	0.416472	0.4285
	355.041	0.79475	322.278	2171.23	701.259	54.6015	0.690044	455.161	2927.75	1165.21	0.127316	0.305627	0.601292	0.369476	0.467046	0.420837
	286.894	0.779845	306.714	2199.88	718.728	43.529	0.681993	455.574	3238.18	1162.95	0.12606	0.33685	0.568326	0.377666	0.470104	0.42283
	197.071	0.717195	348.178	2458.88	930.129	22.1577	0.672747	657.128	4484.27	1559.37	0.105013	0.440212	0.502907	0.405597	0.39398	0.43329
	201.805	0.701618	361.665	2446.08	967.139	22.0773	0.689454	665.737	4591.85	1516.8	0.102273	0.45323	0.493422	0.410311	0.383207	0.427187
	162.527	0.67453	327.039	2373.24	978.301	34.7448	0.658572	444.019	3212.77	1246.19	0.180071	0.514762	0.493353	0.419119	0.399451	0.432548
	198.525	0.71469	339.582	2419.83	916.226	37.7815	0.67139	450.061	3755.25	1314.06	0.169379	0.437775	0.51946	0.405551	0.400183	0.431638
	225.407	0.735277	320.755	2273.07	828.668	32.7462	0.714238	355.338	2785.62	957.814	0.125046	0.38631	0.532178	0.395138	0.461915	0.413728
	193.947	0.668163	346.334	2403.74	1015.49	27.6136	0.700413	423.839	2981.9	1120.41	0.12529	0.485839	0.470551	0.419989	0.406209	0.426124
test_2021_07_16_17_50	331.897	0.720897	413.897	2549.45	998.449	28.5431	0.725174	421.031	3803.37	1117.03	0.0827632	0.400934	0.512625	0.403226	0.379575	0.470031
test_2021_07_16_17_52	400.954	0.723622	413.304	2482.01	981.921	41.7303	0.665334	416.752	2701.92	1108.22	0.0938088	0.428781	0.519358	0.403751	0.388343	0.487029
	343.366	0.677485	418.895	2666.63	1137.26	46.302	0.608298	463.113	2781.03	1283.36	0.128998	0.552639	0.467562	0.418403	0.34685	0.496977
	419.697	0.672471	435.782	2672.63	1160.46	38.7339	0.667391	517.264	3228.33	1342.98	0.0835906	0.504491	0.472384	0.419417	0.366153	0.486491
	385.615	0.677054	411.882	2614.24	1118.69	35.28	0.659027	472.874	3202.42	1306.56	0.0831576	0.509582	0.47857	0.419626	0.349787	0.485131
	368.478	0.648896	392.539	2497.56	1127.1	35.3532	0.653971	442.217	3340.02	1290.74	0.0871416	0.560094	0.466556	0.425726	0.347692	0.488242
	330.331	0.657414	424.54	2577.71	1152.5	41.4518	0.657377	419.28	3015.64	1202.88	0.109369	0.541805	0.460285	0.422222	0.37495	0.491528
	378.678	0.649776	421.651	2636.89	1189.42	38.5411	0.657522	445.718	3048.21	1254.92	0.0912684	0.551835	0.455377	0.425855	0.357223	0.48982
	346.028	0.693407	422.821	2574.33	1076.79	37.5795	0.653182	547.53	3185.79	1337.41	0.0962287	0.486401	0.488783	0.413233	0.364173	0.493657
	405.937	0.667278	389.443	2488.78	1084.41	41.2421	0.678515	387.93	3538.96	1259.13	0.0898978	0.499725	0.473462	0.421277	0.345454	0.481413
	358.172	0.649142	454.726	2848.89	1280.03	43.5508	0.65167	516.015	3200.55	1358.9	0.10676	0.555615	0.434013	0.424716	0.355546	0.4933
	341.098	0.661488	398.686	2678.1	1164.51	34.1127	0.633756	421.075	3208.77	1302.96	0.0907784	0.556058	0.451191	0.423731	0.35333	0.497238
	425.461	0.708247	372.353	2366.2	946.156	38.2242	0.636238	458.283	3634.63	1339.23	0.082507	0.478885	0.509603	0.407573	0.353176	0.494219
	330.48	0.606545	439.186	2749.64	1337.43	42.4314	0.643384	435.28	3149.91	1298.1	0.118151	0.634573	0.413146	0.433186	0.365628	0.49443
	339.443	0.652829	425.744	2566.54	1157.93	42.6962	0.636258	454.902	2862.68	1264.12	0.11093	0.566812	0.458375	0.42279	0.368187	0.494513
	380.848	0.64471	448.192	2765.19	1262.49	42.1793	0.643041	472.883	3019.64	1306.09	0.0985494	0.575221	0.435364	0.426149	0.368499	0.49304
	404.294	0.700151	365.87	2394.16	969.413	34.4706	0.639342	618.319	4110.72	1594.26	0.079647	0.480237	0.500276	0.411273	0.338847	0.49192
	339.685	0.677648	430.093	2587.96	1119.42	38.9227	0.677927	473.401	3258.99	1264.16	0.113516	0.487624	0.485611	0.41836	0.357107	0.484722
	352.647	0.678004	387.409	2590.44	1092.62	63.4265	0.641021	452.234	2705.75	1226.76	0.153656	0.518668	0.464446	0.419809	0.384546	0.498163
	391.605	0.629888	421.847	2579.56	1212.93	36.0944	0.649438	546.461	3496.5	1363.34	0.0851296	0.595803	0.446427	0.42953	0.366589	0.495205
	349.623	0.635643	414.727	2578.12	1194.46	37.6739	0.696672	441.214	3593.08	1209.35	0.090281	0.537114	0.444316	0.427335	0.370264	0.482561
	409.118	0.680335	406.707	2688.02	1125.68	54.7516	0.660809	333.792	2665.69	1080.47	0.117701	0.497755	0.460401	0.418234	0.374992	0.492145
	333.004	0.680583	441.785	2804.06	1184.18	45.9779	0.643779	462.658	3343.8	1275.53	0.119817	0.512034	0.450843	0.417834	0.361122	0.4928
	352	0.686222	418.822	2717.48	1130.43	33.3315	0.694145	427.222	3486.38	1174.9	0.085987	0.465476	0.467581	0.416772	0.378902	0.487861
	371.908	0.677901	427.148	2691.58	1148.26	40.977	0.642348	462.684	3050.62	1295.36	0.098429	0.523087	0.465888	0.418079	0.362242	0.495143
	420.596	0.703249	394.236	2621.98	1045.78	100.418	0.682046	319.236	2570.72	1032.1	0.154944	0.448309	0.474101	0.411801	0.393978	0.484546
	328.048	0.68264	394.818	2649.67	1102.43	33.9444	0.604424	521.899	2976.59	1390.91	0.0925324	0.550756	0.472735	0.418481	0.340026	0.493312
	333.957	0.663492	407.533	2676.63	1155.71	45.8889	0.65402	496.657	4022.17	1419.78	0.122215	0.528311	0.459609	0.422207	0.360312	0.492441
	366.367	0.678259	445.461	2765	1182.2	40.8469	0.660992	483.941	3237.55	1279.7	0.0981854	0.510315	0.456724	0.419142	0.355335	0.487762
	389.563	0.708765	424.066	2792.54	1105.28	39.9244	0.622788	455.118	3144.01	1286.79	0.0915564	0.486807	0.473415	0.408827	0.366526	0.497644
	338.802	0.719887	399.868	2575.34	1005.89	31.198	0.652354	439.339	2894.97	1221.99	0.0853491	0.447509	0.490995	0.406903	0.33565	0.488949
	427.251	0.665929	405.296	2612.77	1138.35	49.8256	0.645924	523.087	4461.31	1443.05	0.102151	0.535812	0.459681	0.422591	0.364464	0.491008
	385.873	0.714078	428.836	2730.26	1081.16	39.6957	0.615407	568.311	3371.34	1438.28	0.0929082	0.484176	0.487027	0.408242	0.351454	0.500726
	358.195	0.720401	393.12	2518.29	984.832	35.5179	0.619065	607.542	3758.56	1506.22	0.0903128	0.476162	0.512401	0.404309	0.334421	0.493187
	411.9	0.695127	409.309	2582.03	1066.4	54.1663	0.631548	396.874	2801.68	1196.9	0.112963	0.497219	0.485601	0.4134	0.375724	0.495704
	391.101	0.701763	403.331	2528.27	1030.99	47.0033	0.651182	433.961	2932.81	1196.34	0.104047	0.474806	0.494305	0.41162	0.365262	0.491831
	375.636	0.68458	417.055	2679.78	1119.2	47.556	0.613409	433.912	3037.75	1308.87	0.108677	0.533692	0.466201	0.416625	0.348789	0.496783
	371.134	0.678113	442.317	2702.84	1161.33	44.067	0.638908	544.572	3536.91	1364.93	0.104503	0.525106	0.474059	0.419179	0.349417	0.492958
	393.25	0.671001	405.645	2589.97	1119.32	49.9213	0.657877	417.125	2937.11	1202.31	0.109919	0.51461	0.469384	0.420502	0.360194	0.492106
	399.471	0.65774	454.361	2858.99	1270	45.6125	0.644522	538.049	3253.93	1369.58	0.101484	0.546352	0.440031	0.423205	0.368719	0.49835
	442.519	0.723524	403.693	2510.35	979.43	51.4469	0.644198	399.302	2855.37	1190.63	0.101434	0.44408	0.513635	0.40445	0.366945	0.493114
	276.287	0.665293	428.896	2563.32	1134.33	33.4395	0.633575	570.988	3842.41	1488.98	0.109873	0.555479	0.468674	0.419332	0.329967	0.49328
	367.238	0.669848	457.652	2893.14	1250.93	46.1165	0.603878	526.57	2900.16	1403.52	0.109571	0.567443	0.438686	0.420056	0.356102	0.502212
	342.904	0.648794	401.288	2669.05	1188.67	73.5978	0.604512	429.316	2971.06	1282.11	0.188664	0.601724	0.426773	0.425081	0.360455	0.500623
	400.047	0.69888	423.084	2598.51	1064.54	51.0581	0.62272	438.485	2949.44	1289.72	0.11689	0.499499	0.475455	0.410798	0.350115	0.494742
	432.238	0.713915	412.745	2647.67	1044.94	37.8178	0.655524	407.573	3034.04	1220.87	0.0798748	0.448412	0.495922	0.408341	0.360222	0.490977
	351.141	0.636759	409.994	2589.41	1197.28	37.9248	0.658569	477.069	3240.66	1255.78	0.0972552	0.572412	0.44753	0.42776	0.373062	0.489326
	380.424	0.683711	428.52	2657.79	1126.01	38.3295	0.639699	452.557	2861.66	1256.85	0.0918558	0.511692	0.475037	0.417741	0.354721	0.497133
	376.047	0.612686	511.233	2902.08	1426.68	30.1946	0.642177	424.945	3026.97	1240.87	0.0776954	0.622291	0.419514	0.432686	0.33985	0.493308
	396.047	0.701946	440.552	2788.38	1132.81	42.9569	0.634392	462.289	2688.38	1209.39	0.0951496	0.491047	0.471725	0.412604	0.363155	0.496041
	385.892	0.677852	440.224	2753.72	1178.93	50.414	0.611464	435.435	3804.18	1330.95	0.114631	0.546974	0.454917	0.418901	0.343445	0.505224
	381.464	0.638003	416.724	2560.24	1184.74	46.3876	0.675336	402.52	2875.6	1155.62	0.105627	0.549717	0.452137	0.427671	0.367242	0.484
	424.663	0.688015	409.679	2573.45	1076.61	59.8575	0.630094	395.451	2723.1	1197.66	0.11596	0.510571	0.480219	0.415543	0.37059	0.497847
	353.825	0.663582	399.356	2530.14	1108.48	41.798	0.667722	408.781	3243.75	1198.17	0.104989	0.518022	0.465838	0.421178	0.368965	0.488558
	367.469	0.739788	389.316	2563	951.682	52.1219	0.639445	438.05	2919.8	1221.45	0.114287	0.423419	0.515067	0.399081	0.356397	0.489712
test_2021_07_16_17_54	334.107	0.67911	423.776	2649.61	1129.2	33.9805	0.683549	414.089	3530.41	1251.98	0.0919768	0.483762	0.472983	0.4183	0.348833	0.479936
test_2021_07_16_17_55	321.081	0.70599	337.314	2285.39	907.308	35.2741	0.683816	487.144	3560.2	1275.87	0.103761	0.445494	0.50957	0.406132	0.440528	0.42732
test_2021_07_16_17_54	320.743	0.708193	347.694	2330.16	923.724	35.1743	0.68232	476.599	3497.8	1267.05	0.103163	0.442637	0.508194	0.406402	0.440495	0.427944
test_2021_07_16_17_55	238.978	0.68291	383.462	2552	1063.84	37.8516	0.67763	554.718	3505.03	1356.91	0.147577	0.487801	0.469756	0.416507	0.441032	0.423727
	309.44	0.658669	392.181	2516.94	1108.08	39.3452	0.618733	604.123	3295	1432.17	0.113752	0.571555	0.471678	0.421967	0.435653	0.440912
	281.595	0.645734	386.746	2613.31	1167.19	37.4486	0.657573	509.325	3287.41	1325.05	0.115852	0.560233	0.444525	0.427118	0.41338	0.433645
	331.502	0.655501	357.621	2346.87	1032.81	32.9225	0.676951	450.279	2858.38	1146.38	0.089496	0.528751	0.47794	0.422422	0.435964	0.428136
	348.06	0.658891	375.389	2418.82	1067.06	37.0351	0.625076	457.325	3257.06	1326.36	0.0942174	0.572838	0.47409	0.423015	0.427634	0.439637
	344.2	0.649714	410.834	2535.21	1148.21	30.4421	0.683573	369.254	2769.09	1088.26	0.0816075	0.525916	0.470769	0.426699	0.437468	0.433555
	282.267	0.680406	402.678	2629.32	1107.99	27.8721	0.655393	524.173	3780.22	1370.01	0.0910698	0.516192	0.478939	0.417334	0.443181	0.435166
	369.447	0.666175	380.827	2562.34	1101.5	32.1842	0.632657	549.051	3233.62	1401.15	0.0834652	0.54987	0.479462	0.4231	0.423385	0.438081
	367.785	0.658253	362.073	2440.17	1065.32	38.6316	0.642112	480.624	2833.41	1257.63	0.0960618	0.55057	0.470209	0.424327	0.430463	0.434346
	245.782	0.698882	394.883	2710.45	1083.58	34.1864	0.612702	470.186	3178.64	1338.7	0.123879	0.514304	0.473431	0.413048	0.421216	0.445102
	357.39	0.704681	365.966	2598.02	1021.5	42.461	0.653816	448.644	2735.97	1185.17	0.103823	0.465774	0.471009	0.413422	0.445809	0.433169
	351.661	0.678973	361.755	2470.09	1031.38	39.6426	0.655077	419.032	2827.91	1150.91	0.102428	0.509068	0.478231	0.417989	0.450865	0.432426
	294.447	0.703115	377.106	2522.09	1007.77	29.6	0.680672	456.452	3251.3	1246.71	0.0926696	0.449338	0.489599	0.412204	0.415341	0.423927
	357.382	0.696734	371.952	2554.26	1028.9	41.2369	0.627722	413.835	3112.76	1233.86	0.100938	0.508977	0.482018	0.412049	0.421198	0.434716
	360.29	0.666419	367.239	2399.54	1037.99	46.5952	0.658784	454.882	3116.86	1266.93	0.114723	0.518971	0.475873	0.420607	0.435519	0.436595
	312.372	0.637734	355.122	2337.69	1066.78	38.7905	0.680347	420.423	2852.7	1135.15	0.109937	0.546189	0.479795	0.427803	0.446375	0.428974
	279.251	0.684966	375.301	2471.35	1025.25	36.7866	0.630339	519.022	3070.62	1375.67	0.116809	0.518925	0.480003	0.414858	0.413851	0.441507
	261.356	0.676378	355.951	2449.62	1028.11	52.4972	0.645099	411.129	2712.78	1164.97	0.164517	0.520665	0.476957	0.419105	0.448254	0.436031
	269.358	0.71349	393.823	2722.36	1050.91	36.3311	0.639005	443.009	3395.25	1307.41	0.11911	0.458761	0.47778	0.408226	0.423159	0.44214
test_2021_07_16_17_57	336.442	0.691455	388.909	2633.21	1075.07	48.2596	0.627216	443.483	2636.76	1215.35	0.125756	0.508614	0.462771	0.417483	0.4389	0.439998
test_2021_07_16_17_59	257.144	0.703202	370.784	2598.3	1019.51	33.7908	0.685721	373.893	3078.56	1139.69	0.117779	0.451734	0.485957	0.409013	0.413708	0.426945
	286.711	0.653563	393.293	2576.99	1136.01	37.7584	0.624191	474.608	3003.18	1324.77	0.115464	0.580251	0.455486	0.424505	0.409101	0.442417
	340.494	0.732274	391.423	2593.22	978.278	43.1462	0.626199	366.12	2682.32	1173.05	0.11236	0.439107	0.498264	0.401669	0.439367	0.439442
	196.895	0.693265	336.957	2627.74	1025.52	49.7385	0.636711	411.225	2677.78	1185.62	0.266195	0.497232	0.444974	0.41849	0.441587	0.4396
	258	0.683109	397.027	2644.82	1093.36	27.4565	0.686853	355.473	2915.06	1101.52	0.0967452	0.472231	0.470652	0.415811	0.422914	0.429374
	287.273	0.674217	419.199	2585.25	1116.16	32.8909	0.667764	458.479	3510.44	1293.68	0.105594	0.5051	0.453674	0.418595	0.412031	0.435085
	288.905	0.678549	406.328	2665.82	1127.9	40.6764	0.660987	373.583	2805.82	1140.41	0.123743	0.4991	0.454621	0.416622	0.438488	0.435305
	330.113	0.697875	361.374	2386.57	968.646	74.1271	0.656221	404.495	2682.76	1094.37	0.138805	0.47609	0.498481	0.411622	0.456633	0.431718
	264.704	0.671294	395.162	2519.88	1083.84	35.1398	0.676429	355.566	2745.86	1060.81	0.117854	0.500262	0.482808	0.419654	0.447232	0.427667
	328.585	0.685347	384.873	2530.94	1050.99	44.1383	0.649222	329.015	2844.22	1124.49	0.120106	0.502587	0.480953	0.416787	0.419705	0.439115
	288.313	0.644325	446.736	2769.85	1262.29	28.64	0.666445	445.081	3290.48	1262.98	0.0902594	0.556111	0.445415	0.427093	0.429657	0.432081
test_2021_07_16_17_57	278.508	0.652618	459.847	2734.02	1239.09	27.1695	0.639509	525.065	3233.56	1378.66	0.0904208	0.568751	0.452055	0.425301	0.427345	0.443772
test_2021_07_16_17_59	312.122	0.645645	442.627	2714.18	1238.01	61.2177	0.654962	499.29	3521.92	1367.08	0.146616	0.555388	0.444759	0.425315	0.43745	0.43314
	314.222	0.670015	393.758	2690.37	1139.19	38.9145	0.628519	437.224	3344.89	1332.25	0.110313	0.538855	0.443947	0.419207	0.438931	0.442247
	307.414	0.67637	402.419	2645.78	1116.23	34.0837	0.653263	519.716	3402.36	1378.35	0.0998646	0.514956	0.46716	0.41753	0.422979	0.432416
	291.429	0.634599	453.385	2703.49	1263.82	33.3056	0.671961	488.944	3715.86	1344.32	0.103663	0.55676	0.453307	0.428136	0.438017	0.4348
	441.263	0.668763	404.922	2555.46	1108.04	41.0947	0.650775	457.1	2767.89	1205.88	0.0832888	0.522418	0.466232	0.42007	0.446937	0.434656
	260.551	0.667159	385.079	2595.09	1110.86	38.8248	0.659599	463.292	3186.76	1282.99	0.130836	0.521189	0.461442	0.42157	0.428167	0.433867
	288.537	0.632136	457.084	2779.91	1298.76	27.6423	0.656235	433.513	3322.67	1267.94	0.0865258	0.589488	0.441824	0.429466	0.428141	0.435127
	253.36	0.678126	353.534	2477.98	1030.28	90.1419	0.640327	550.859	4118.32	1441.07	0.246601	0.517118	0.460903	0.419348	0.437387	0.437169
	304.264	0.600092	437.418	2716.82	1335.59	37.2286	0.634999	418.352	2909.21	1257.75	0.109231	0.647321	0.421695	0.435461	0.431467	0.437911
	344.97	0.716459	390.592	2590.28	1005.81	50.6689	0.6337	505.511	3892.84	1377.79	0.123226	0.465565	0.488533	0.407354	0.442438	0.441874
	284.493	0.648173	431.189	2727.84	1229.06	36.1933	0.642246	473.71	3250.17	1316.06	0.11376	0.572261	0.441895	0.426631	0.436948	0.437041
	299.249	0.703542	393.084	2497.06	1008.21	57.1878	0.664999	414.284	2624.41	1108.96	0.153234	0.465061	0.500076	0.410645	0.475665	0.424965
	331.738	0.676317	405.369	2576.14	1098.62	44.8507	0.644584	504.517	3086.64	1346.82	0.118648	0.514735	0.474547	0.418202	0.430584	0.435682
	301.164	0.680756	413.615	2676.5	1128.09	36.3115	0.618292	469.418	2938.02	1317.3	0.111436	0.538159	0.471957	0.418141	0.419414	0.439055
	346.205	0.703804	398.389	2569.96	1033.01	45.8895	0.67219	457.083	3003.85	1227.14	0.115625	0.455533	0.492968	0.411297	0.448881	0.428882
	371.738	0.700303	419.605	2683.78	1094.02	41.4562	0.648736	430.142	3331.82	1330.9	0.0979438	0.478612	0.476124	0.412888	0.425508	0.43564
	290.908	0.683729	394.385	2532.32	1063.47	44.4335	0.646898	381.669	2691.55	1148.16	0.143062	0.509005	0.480673	0.414558	0.445142	0.434216
	144.487	0.60892	364.571	2673.57	1244.88	60.6569	0.636617	466.417	3450.46	1344.84	0.308304	0.636056	0.393138	0.433617	0.426743	0.436901
	327.096	0.686772	432.328	2602.73	1101.98	33.9559	0.666386	503.779	3483.87	1278.99	0.0926259	0.497648	0.482189	0.414829	0.432947	0.423917
	279.162	0.693357	421.028	2667.79	1096.69	35.277	0.631409	473.651	3348.82	1393.97	0.112641	0.502019	0.476662	0.413876	0.404201	0.441052
	247.632	0.655261	391.438	2569.93	1132.36	95.5561	0.655246	457.607	2950.45	1241.12	0.253393	0.538871	0.452695	0.423806	0.437558	0.435046
	262.259	0.64773	442.216	2639.82	1202.34	35.386	0.688158	386.558	3445.96	1164.25	0.121135	0.528046	0.456018	0.425068	0.433156	0.430055
	303.652	0.727939	399.02	2688.4	1020.72	37.061	0.664936	434.377	3548.38	1262.98	0.106231	0.429548	0.496439	0.403808	0.411991	0.431168
test_2021_07_16_18_00	267.084	0.668563	412.082	2719.27	1167.47	42.1883	0.66538	429.181	3404.27	1260.85	0.138973	0.513569	0.456365	0.420399	0.424963	0.431504
test_2021_07_16_18_02	266.809	0.718103	424.714	2681.16	1050.92	36.9385	0.684292	378.972	2743.97	1071.07	0.123238	0.420256	0.494774	0.408243	0.465411	0.427309
	264.127	0.685853	386.476	2511.81	1047.15	36.7324	0.641571	477.1	3269.93	1309.87	0.122219	0.511556	0.472528	0.416771	0.430406	0.432483
test_2021_07_16_18_00	263.832	0.70182	382.55	2484.41	1002.15	34.2525	0.661278	495.812	4384.06	1408.35	0.116202	0.46754	0.488396	0.412553	0.418695	0.432018
test_2021_07_16_18_02	281.195	0.672123	367.265	2537.03	1068.65	44.4569	0.663694	424.338	3099.34	1279.6	0.137778	0.505511	0.45931	0.420392	0.419088	0.432482
	262.316	0.641431	410.733	2365.55	1100.57	24.4737	0.663994	466.11	2487.07	1087.62	0.0877842	0.553372	0.480368	0.424092	0.441126	0.440631
	306.885	0.691251	415.903	2557.89	1070.58	32.4199	0.715777	442.528	3361.35	1197.83	0.0956247	0.439267	0.486481	0.415066	0.453552	0.418233
	312.028	0.69015	385.827	2535.4	1045.13	44.5648	0.638917	454.39	3098.89	1285.43	0.124032	0.502282	0.468278	0.416054	0.431071	0.43565
	289.759	0.648824	415.825	2551.7	1159.51	30.6296	0.719985	394.303	3339.7	1073.72	0.0929986	0.500152	0.463535	0.427117	0.434177	0.418312
	353.241	0.678372	431.878	2673.06	1144.21	37.3684	0.67895	441.26	3251.34	1183.52	0.0933178	0.486813	0.47433	0.419427	0.460748	0.428292
	359.449	0.639747	367.715	2439.23	1102.87	37.5362	0.643691	378.443	2532.34	1086.34	0.0932933	0.595377	0.449268	0.427571	0.448332	0.432607
	294.345	0.648657	350.137	2271.28	1019.52	54.5473	0.647184	436.588	3726.43	1230.13	0.155129	0.560106	0.480803	0.423891	0.44509	0.43126
	309.96	0.674399	360.401	2560.11	1067.87	38.8342	0.651573	450.189	3811.78	1344.4	0.112392	0.516692	0.456262	0.420742	0.407662	0.433367
	320.213	0.680776	375.548	2633.92	1092.52	37.9527	0.656941	404.305	2706.07	1129.43	0.106516	0.500623	0.463162	0.417524	0.447251	0.432911
	374.314	0.66622	394.389	2515.47	1098.28	45.6271	0.674989	419.717	3014.69	1162.28	0.10215	0.513001	0.469238	0.421552	0.433617	0.426827
	238.519	0.671979	403.299	2600.02	1112.89	34.4177	0.655114	397.774	2667.36	1115.33	0.127709	0.516202	0.473688	0.41881	0.448364	0.433193
	249.945	0.655227	379.09	2592.17	1137.29	33.13	0.65703	364.949	2664.79	1094.33	0.11947	0.544499	0.456609	0.42416	0.448879	0.433475
	181.961	0.641992	349.953	2755.08	1189.13	50.7268	0.640848	403.725	2682.64	1187.3	0.261659	0.574444	0.401158	0.427714	0.445882	0.437327
	322.192	0.680459	370.507	2506.83	1046.84	42.9167	0.685352	351.053	2809.24	1062.31	0.114636	0.47956	0.480161	0.417987	0.461574	0.42486
	291.12	0.651464	389.894	2479.25	1109.38	42.0984	0.666529	461.886	2892.75	1222.7	0.124844	0.539397	0.468308	0.423276	0.443771	0.43008
	343.988	0.663361	387.821	2633.73	1135.91	47.7117	0.664746	388.144	2847.5	1134.89	0.114907	0.518341	0.458753	0.422852	0.437392	0.431923
	281.509	0.675216	389.545	2632.01	1107.82	47.1478	0.636009	502.273	3480.96	1300.9	0.136674	0.534291	0.467424	0.418945	0.437736	0.434147
	380.404	0.682842	373.859	2470.11	1032.81	45.2267	0.65666	400.899	2707.37	1141.83	0.104029	0.497458	0.488893	0.416581	0.441055	0.433354
	271.364	0.674587	439.652	2773.3	1190.89	31.947	0.694171	434.513	2978.22	1142.73	0.105	0.479407	0.46132	0.420557	0.433362	0.423534
	330.602	0.659385	447.658	2783.26	1230.87	44.5455	0.663382	413.185	3054.34	1163.34	0.115512	0.531745	0.448114	0.42271	0.447101	0.427679
	289.573	0.694619	366.67	2387.76	977.494	48.4407	0.665248	414.945	2990.79	1183.16	0.139527	0.472953	0.497813	0.411591	0.439841	0.434175
	253.557	0.669974	375.054	2527.01	1074.29	64.5612	0.627783	370.754	2710.75	1207.82	0.207656	0.536012	0.472606	0.42098	0.429941	0.440422
	268.136	0.635658	419.308	2757.03	1253.67	35.6039	0.681149	356.189	3052.88	1087.46	0.121629	0.546568	0.423681	0.427041	0.440838	0.438691
	285.532	0.665099	404.507	2582.9	1122.95	34.6117	0.645323	402.061	2825.76	1179.93	0.111706	0.544464	0.464344	0.421376	0.415099	0.441907
	302.574	0.700955	390.907	2543.48	1024.73	38.3904	0.662059	345.317	2478.27	1018.93	0.109409	0.466026	0.484369	0.411867	0.452848	0.430855
	320.044	0.673425	363.717	2498.2	1055.05	38.4019	0.651707	419.804	2919.05	1170.1	0.107999	0.521691	0.46314	0.421316	0.434558	0.430692
	280.414	0.666977	432.513	2699.02	1170.44	36.7643	0.630617	491.702	3134.47	1271.62	0.115897	0.551234	0.458717	0.420506	0.422311	0.43822
	302.316	0.644167	402.678	2654.87	1191.55	42.0305	0.64933	374.386	2561.72	1093.96	0.120713	0.562465	0.440404	0.426258	0.44783	0.439619
	223.089	0.656546	418.924	2645.27	1167.54	37.2013	0.646602	360.86	2759.86	1155.35	0.150567	0.543997	0.454143	0.424138	0.415371	0.440607
test_2021_07_16_18_04	162.789	0.711741	324.516	2421.65	921.099	29.8553	0.665519	584.94	2944.59	1253.28	0.169534	0.451815	0.508811	0.407615	0.461803	0.428792
test_2021_07_16_18_05	257.086	0.66485	413.232	2635.06	1148.17	32.7879	0.634741	463.611	3014.74	1347.34	0.113488	0.543916	0.450455	0.423074	0.421929	0.442377
	265.837	0.639802	358.701	2407.61	1088.99	29.6304	0.670302	453.528	2840.29	1153.68	0.0986348	0.554962	0.459845	0.426703	0.438019	0.432127
	231.173	0.672836	384.415	2674.95	1121.67	24.9012	0.695881	484.435	3115.79	1194.01	0.0971527	0.491845	0.454219	0.420286	0.447625	0.419103
	292.023	0.657747	372.605	2636.46	1141.85	36.5493	0.677561	433.868	3664.72	1272.89	0.111684	0.518274	0.450876	0.424849	0.4182	0.429548
	283.143	0.672694	388.906	2650.08	1120.13	33.3631	0.653162	438.461	3107.5	1259.83	0.107282	0.516	0.46849	0.421392	0.43107	0.433814
	290.412	0.664929	392.349	2663.8	1144.6	45.9455	0.636785	432.727	2695.52	1213.58	0.133286	0.544865	0.43928	0.420358	0.423674	0.443392
	249.037	0.64165	410.343	2660.97	1209.42	33.9383	0.656583	488.247	3250.96	1348.03	0.119184	0.561636	0.439252	0.427434	0.398406	0.438582
	294.377	0.675161	387.973	2578.21	1086.52	38.3766	0.670675	454.934	3749.27	1314.15	0.11271	0.500855	0.470716	0.41822	0.421701	0.433656
	261.025	0.738024	379.653	2579.62	945.895	31.9008	0.65313	402.226	2728.2	1168.27	0.106042	0.412031	0.502726	0.400442	0.426208	0.440802
	208.21	0.660272	391.64	2606.72	1134.9	31.5726	0.659924	448.286	3134.22	1273.69	0.134796	0.530886	0.460087	0.422959	0.425974	0.434335
	277.718	0.67787	401.02	2618.95	1101.19	35.6987	0.663558	570.993	4513.44	1421.82	0.11287	0.506576	0.466903	0.417074	0.428471	0.433609
	279.511	0.662715	393.422	2664.12	1151.12	44.3138	0.630385	405.968	2694.53	1215.44	0.134517	0.553588	0.437786	0.421615	0.428068	0.439961
	257.104	0.685059	386.739	2592.16	1074.06	39.0438	0.655858	526.959	3292.65	1390.9	0.133126	0.496665	0.467362	0.414492	0.409486	0.434871
	323.311	0.67425	374.986	2451.67	1044.55	53.7664	0.642788	396.55	2775.77	1218.29	0.134248	0.51698	0.476538	0.418199	0.439788	0.438204
	356.908	0.668301	419.54	2673.02	1161.69	43.3663	0.641649	451.531	3277.04	1281.67	0.105872	0.536497	0.453986	0.421514	0.423256	0.437775
	269.007	0.66744	373.208	2566.09	1092.74	45.8229	0.663235	542.737	3709.35	1417.85	0.143999	0.516672	0.460569	0.421929	0.412147	0.433499
	218.118	0.638102	380.134	2621.73	1185.38	35.5833	0.650775	495.664	3149.6	1356.79	0.142267	0.573981	0.437414	0.427611	0.412364	0.436847
	220.494	0.606639	416.682	2733.12	1310.58	31.3872	0.646087	460.631	3119.55	1258.25	0.124909	0.641746	0.424857	0.434248	0.432857	0.437249
	303.664	0.680431	367.301	2443.38	1022.45	43.4942	0.662438	417.481	3062.9	1237.99	0.121405	0.492691	0.49192	0.418324	0.416676	0.431763
	344.712	0.629687	364.881	2424.18	1118.71	54.9336	0.610125	526.198	3368.8	1463.26	0.136516	0.639351	0.459872	0.429808	0.400402	0.440114
	256.385	0.632467	375.66	2627.5	1191.75	50.3013	0.702406	345.353	2710.34	1039.41	0.154517	0.548219	0.434678	0.428656	0.464521	0.412413
	227.213	0.671556	353.719	2541.61	1056.75	94.4638	0.620342	488.299	2889.76	1317.52	0.276311	0.550455	0.446583	0.419899	0.431156	0.438509
	271.928	0.603406	432.888	2771.11	1348.6	41.701	0.663028	433.926	2774.48	1141.36	0.130971	0.617377	0.417293	0.434517	0.451934	0.428385
	326.667	0.706882	373.825	2552.99	1005.78	58.6667	0.622547	433.65	2769.59	1281.3	0.142094	0.482338	0.466993	0.410598	0.415592	0.441929
	302.023	0.68065	393.444	2539.66	1072.17	48.7006	0.63889	496.217	3195.41	1290.23	0.137484	0.51989	0.472886	0.417449	0.424464	0.439115
	237.735	0.672343	394.404	2661.8	1127.78	37.7424	0.654488	434.417	2996.7	1270.24	0.142008	0.513213	0.461528	0.41949	0.419068	0.434706
	263.884	0.69338	399.549	2546.88	1048.82	35.3652	0.671761	365.18	2741.93	1066.74	0.126104	0.469105	0.483689	0.414162	0.457742	0.430063
	223.91	0.683807	375.727	2518.04	1044.32	42.3133	0.658044	352.49	2871.7	1116.8	0.171865	0.491889	0.478791	0.414677	0.44201	0.435796
	255.88	0.770703	403.648	2465.6	873.56	34.2933	0.677174	292.525	2652.65	900.023	0.120291	0.353054	0.552841	0.387269	0.470649	0.431472
test_2021_07_16_18_09	196.804	0.676854	400.122	2522.11	1067.49	28.5405	0.614013	460.24	3142.88	1394.45	0.124237	0.551227	0.48232	0.416369	0.396889	0.444958
test_2021_07_16_18_09	181.021	0.70021	393.06	2743.47	1081.46	29.8214	0.649396	687.038	3997.73	1531.04	0.142208	0.487416	0.47549	0.413212	0.41106	0.443528
	183.058	0.659307	413.596	2614.18	1151.18	19.2788	0.681239	706.078	4842.64	1501.78	0.0993311	0.53007	0.470275	0.423652	0.401243	0.431214
	230.112	0.681221	411.673	2640.24	1108.06	33.5341	0.689614	508.332	3944.43	1276.59	0.122011	0.485152	0.481142	0.417162	0.447272	0.422285
	178.608	0.660874	400.206	2548.08	1115.38	26.2238	0.646562	611.053	3909.1	1505.07	0.129503	0.545711	0.4712	0.420642	0.394958	0.441087
	218.352	0.649048	427.914	2665.57	1196.15	26.9931	0.66818	489.407	3337.03	1321.21	0.10633	0.539509	0.460775	0.424436	0.391703	0.443324
	234.551	0.667625	442.23	2673.77	1174.97	26.7472	0.712285	584.855	4874.28	1499.05	0.100923	0.482509	0.473474	0.420485	0.405477	0.417643
	234.207	0.666277	417.101	2707.85	1170.02	34.6425	0.616181	485.425	3063.8	1189.35	0.128915	0.570566	0.45077	0.41994	0.455724	0.443062
	275.321	0.667436	393.142	2624.65	1122.57	36.2176	0.625871	614.061	3476.88	1499.39	0.112471	0.548484	0.464662	0.41958	0.406363	0.448195
	186.943	0.649586	409.404	2603.64	1166.29	28.7558	0.655006	513.166	3841.06	1404.7	0.135357	0.552702	0.459841	0.424552	0.405838	0.43744
	269.095	0.703821	426.574	2750.79	1106.75	39.3103	0.666576	505.519	3609.86	1297.73	0.126786	0.459709	0.47455	0.411773	0.442182	0.431658
	153.261	0.650136	381.574	2836.32	1224.11	49.6322	0.64838	477.105	3005.24	1282.86	0.269189	0.565354	0.405609	0.424256	0.433106	0.436612
	231.593	0.706211	350.523	2374.99	937.161	39.4634	0.675319	424.431	3165.92	1188.47	0.137427	0.446209	0.504863	0.407514	0.425258	0.430597
	219.364	0.636529	416.606	2719.26	1237.81	33.9802	0.637309	481.335	3073.75	1341.49	0.136015	0.595027	0.445214	0.428635	0.40606	0.442995
	170.57	0.689691	421.481	2635.94	1095.07	31.2127	0.634179	523.358	3481.5	1411.41	0.150922	0.511021	0.482651	0.412215	0.406937	0.442339
	225.752	0.642674	380.209	2546.94	1141.99	35.9636	0.665614	460.429	3370.36	1265.18	0.137869	0.55846	0.450944	0.426446	0.417595	0.434056
	210.236	0.660537	457.954	2914.1	1277.74	25.2911	0.671315	476.092	3714.21	1347.62	0.107534	0.522943	0.448315	0.423183	0.417537	0.428726
	250.834	0.638031	438.686	2748.36	1255.75	38.8967	0.643819	583.38	4945.23	1538	0.131484	0.580371	0.447007	0.426926	0.400827	0.436987
	223.969	0.694341	370.533	2499.85	1016.33	41.6226	0.658912	434.647	3332.23	1212.62	0.150388	0.481983	0.489271	0.413072	0.429168	0.433991
	194.04	0.695836	400.404	2645.16	1068.29	29.902	0.628326	491.733	3631.4	1365.77	0.134937	0.51243	0.481131	0.413173	0.42039	0.444255
	192.375	0.664077	442.877	2725.37	1193.46	33.8123	0.633617	501.941	3380.32	1382.04	0.153936	0.556192	0.45593	0.420564	0.398003	0.443178
	197.936	0.643246	420.134	2759.04	1242.81	35.2622	0.656677	467.149	3906.89	1367.76	0.154527	0.558118	0.436216	0.425524	0.405518	0.440153
	231.605	0.640193	397.342	2675.7	1204.78	41.2478	0.649928	523.829	3528.2	1387.43	0.151656	0.567967	0.439119	0.426084	0.413347	0.436831
	222.424	0.651723	422.114	2745.98	1208.94	39.0814	0.658635	543.507	4741.89	1474.73	0.148727	0.552995	0.436212	0.423068	0.405488	0.431346
	193.939	0.696157	400.644	2646.39	1068.18	29.8902	0.628261	493.044	3637.09	1367.96	0.134953	0.512066	0.481277	0.413103	0.420287	0.444219
	193.517	0.661563	439.518	2722.67	1196.17	33.6629	0.63511	494.866	3423.89	1379.62	0.152731	0.558543	0.454631	0.421226	0.398506	0.443114
	194.423	0.647366	421.482	2759.78	1234.3	34.3551	0.658204	476.399	3967.09	1380.12	0.15419	0.549653	0.438817	0.424618	0.402649	0.439948
test_2021_07_30_14_41	323.913	0.693104	392.547	2499.27	1033.07	32.7112	0.633216	466.612	2847.29	1219.93	0.0914001	0.504273	0.485112	0.413597	0.408536	0.460705
test_2021_07_30_14_43	293.691	0.654386	411.517	2589.75	1153.36	31.9281	0.64998	535.47	4098.56	1458.56	0.0972746	0.549152	0.459366	0.422728	0.37027	0.446596
	290.942	0.649992	414.178	2616.01	1171.45	30.4863	0.643759	492.492	3953.46	1400.47	0.0945503	0.563543	0.455227	0.42403	0.375314	0.458276
	342.984	0.664566	394.401	2429.79	1070.31	37.6444	0.648759	419.538	3521.19	1330.8	0.0964261	0.53645	0.478586	0.420163	0.377431	0.452469
	268.369	0.709071	379.148	2205.49	902.699	26.2542	0.6616	441.559	3639.28	1295.73	0.0877205	0.451336	0.534152	0.404067	0.369523	0.455958
	310.372	0.69297	417.235	2547.38	1066.4	39.8915	0.673244	490.138	3636.51	1282.7	0.110485	0.480863	0.501967	0.409624	0.386638	0.450356
	302.448	0.648827	412.009	2615.36	1178.04	48.6512	0.633942	511.373	3431.69	1295.77	0.137114	0.582217	0.450427	0.425149	0.409413	0.45927
	399.467	0.717307	373.336	2358.72	929.495	57.956	0.654781	282.612	2444.36	995.35	0.12266	0.444315	0.512476	0.404963	0.432113	0.454155
	275.893	0.750717	346.759	2093.51	776.185	46.8588	0.696426	336.751	2596.07	948.365	0.136897	0.370731	0.578207	0.384481	0.449374	0.441021
	311.094	0.697794	372.475	2412.17	978.52	44.4286	0.576398	547.435	2935.02	1439.14	0.119978	0.5443	0.505428	0.410226	0.384733	0.471602
	308.742	0.703952	367.353	2319.3	937.456	32.48	0.656164	415.809	3171.86	1230.78	0.0961805	0.464819	0.519278	0.406749	0.388662	0.456337
	412.643	0.756638	369.865	2202.33	813.421	55.929	0.631914	421.582	2623.49	1176.41	0.115981	0.395575	0.565448	0.386699	0.412326	0.457258
	335.217	0.694628	364.028	2372.55	965.973	43.1778	0.63677	366.701	3316.99	1202.86	0.110361	0.506827	0.507325	0.410976	0.391225	0.461443
	385.291	0.676688	370.833	2293.71	988.154	37.4326	0.65039	344.991	2515.49	1043.46	0.0875985	0.517755	0.501969	0.415793	0.403548	0.461416
	355.705	0.621593	396.368	2419.56	1151.57	43.5597	0.655023	326.814	2737.88	1091.75	0.103406	0.596243	0.458075	0.429824	0.39753	0.458069
	282.648	0.69519	383.016	2422.27	997.983	31.4722	0.668836	360.417	2620.04	1041.14	0.100098	0.475173	0.506177	0.409916	0.39566	0.449987
	313.337	0.659345	370.914	2348.92	1035.89	40.7608	0.643839	383.731	2838.83	1116.87	0.108071	0.548678	0.489224	0.419982	0.391495	0.46088
	349.594	0.702492	356.539	2246.78	912.269	40.4161	0.658308	344.328	2712.27	1088.25	0.0998254	0.467244	0.518661	0.406694	0.403047	0.453818
	388.033	0.687024	373.129	2277.37	962.025	47.1788	0.633203	358.872	3036.12	1181.57	0.108395	0.510397	0.510627	0.41145	0.402152	0.461359
	312.62	0.719975	369.998	2284.86	898.709	32.5812	0.677226	339.916	2713.1	1030.03	0.0934886	0.433756	0.535481	0.401077	0.400937	0.453619
	438.651	0.68207	398.642	2417.35	1036.32	53.0511	0.644663	351.528	2465.02	1072.91	0.105838	0.506166	0.482691	0.416592	0.423888	0.461829
	341.435	0.72884	381.108	2400.91	919.182	34.6454	0.656819	313.845	2445.74	1010.09	0.0925539	0.426529	0.52571	0.4006	0.401532	0.464935
	355.379	0.740604	373.016	2254.89	856.782	38.0278	0.668275	334.657	2767.88	1077.53	0.0950123	0.396538	0.548092	0.394417	0.411579	0.45746
	385.417	0.702583	366.726	2356.64	949.218	50.2583	0.625173	364.218	2578.12	1154.37	0.114087	0.489981	0.503285	0.408974	0.398204	0.462686
	211.826	0.707937	361.852	2318.65	921.858	26.9249	0.711874	255.083	2409.98	827.957	0.114572	0.424249	0.510865	0.404932	0.431709	0.446833
	428.514	0.68231	366.429	2351.56	991.741	54.9238	0.644743	305.795	2409.03	1017.01	0.111681	0.506687	0.494796	0.415929	0.411012	0.461913
	423.177	0.659797	371.336	2389.9	1053.15	48.4295	0.618083	381.461	3067.13	1258.25	0.101682	0.566518	0.485453	0.421385	0.380124	0.463246
	364.836	0.699049	370.411	2332.4	957.509	45.9454	0.659131	293.345	2426.85	985.939	0.107953	0.472319	0.506702	0.409508	0.411339	0.460478
	271.87	0.758226	365.685	2215.7	806.107	25.5479	0.707324	332.808	3163.71	1091.22	0.0851505	0.354583	0.570336	0.385626	0.37767	0.44353
	254.763	0.723189	357.57	2202.44	860.22	25.7781	0.710778	314.722	2593.7	919.018	0.0931539	0.399165	0.543386	0.396935	0.425934	0.446992
	306.133	0.718712	363.041	2380.04	922.007	35.2733	0.674798	374.487	2837.18	1080.72	0.104679	0.428557	0.516744	0.404542	0.389468	0.45135
test_2021_07_30_14_41	316.395	0.712495	419.271	2435.56	989.851	36.4922	0.667467	407.211	3681.04	1272.28	0.102657	0.444067	0.510908	0.406538	0.372515	0.450443
test_2021_07_30_14_43	208.086	0.659105	399.118	2650.92	1148.82	24.5579	0.755535	240.955	2587	744.324	0.108438	0.463306	0.452943	0.422461	0.441356	0.427714
test_2021_07_30_14_41	249.433	0.704427	372.306	2280.6	931.379	32.4577	0.719583	289.135	2429.33	823.104	0.111239	0.428134	0.525108	0.403593	0.447864	0.437159
test_2021_07_30_14_43	172.978	0.747791	359.7	2306.68	842.197	18.1471	0.765634	240.612	2690.02	770.437	0.098366	0.334698	0.562103	0.389113	0.437946	0.436373
	168.157	0.669177	375.26	2439.37	1042.03	18.3837	0.727825	229.383	2085.45	700.61	0.102827	0.469289	0.481054	0.418832	0.468165	0.444358
	342.984	0.664566	394.401	2429.79	1070.31	37.6444	0.648759	419.538	3521.19	1330.8	0.0964261	0.53645	0.478586	0.420163	0.377431	0.452469
test_2021_07_30_14_46	345.773	0.694161	495.261	2839.34	1202.79	45.437	0.688199	517.75	3570.64	1408.39	0.111329	0.4513	0.48318	0.414295	0.402688	0.429959
test_2021_07_30_14_48	335.469	0.683741	441.173	2902.53	1205.49	40.7862	0.653032	592.82	3581.41	1558.07	0.107419	0.500801	0.443385	0.414977	0.387576	0.440772
	375.12	0.691843	409.695	2628.42	1084.32	52.9733	0.625167	588.8	3969.31	1550.88	0.112524	0.510156	0.483649	0.414392	0.397549	0.444444
	343.655	0.697597	414.299	2515.1	1040.14	50.7636	0.639657	502.511	2939.46	1319.09	0.129421	0.488344	0.502836	0.411553	0.425434	0.437647
	317.384	0.692269	450.288	2687.93	1113.05	42.2121	0.682621	491.583	3654.56	1435.61	0.11545	0.468408	0.489834	0.411935	0.39114	0.425059
	343.943	0.667112	454.489	2621.56	1163.75	49.6453	0.643964	469.778	3140.46	1321.45	0.126487	0.534194	0.476468	0.420188	0.415466	0.438499
	372.749	0.689147	455.681	2658.59	1136.58	65.3575	0.642613	459.765	3143.28	1356.07	0.136943	0.502817	0.494426	0.415709	0.406052	0.441362
	340.043	0.646683	461.272	2560.55	1193.04	43.2253	0.664474	517.807	3746.44	1483.93	0.111474	0.548407	0.484122	0.425419	0.379886	0.432951
	310.053	0.69383	436.049	2585.03	1085.45	52.5471	0.674436	425.327	2779.58	1185.5	0.138701	0.47271	0.492284	0.413865	0.447761	0.429705
	357.094	0.659355	447.533	2648.04	1187.76	42.4152	0.675872	453.792	3172.91	1272.12	0.103516	0.522184	0.473567	0.423039	0.419007	0.434184
	352.667	0.679796	433.614	2592.86	1119.9	42	0.668717	496.042	3446.95	1371.36	0.106396	0.497758	0.489203	0.418466	0.395325	0.435614
	417.728	0.718475	411.004	2503.26	994.364	50.5027	0.664919	439.696	3059.07	1209.63	0.106715	0.436552	0.521936	0.40487	0.437717	0.434145
	306.672	0.684012	397.967	2572.21	1075.31	46.2464	0.671453	489.098	3422.52	1355.42	0.133165	0.481842	0.484723	0.416903	0.396358	0.4372
	219.847	0.756018	409.259	2730.11	978.495	51.243	0.644285	487.327	2918.78	1293.61	0.212982	0.388672	0.531101	0.387982	0.437096	0.441489
	317.751	0.656709	409.233	2705.09	1187.23	54.6537	0.706682	348.835	3115.62	1083.17	0.140665	0.497164	0.449595	0.422952	0.437103	0.426554
	351.215	0.671041	432.672	2768.7	1184.17	63.6296	0.723199	401.153	2704.03	996.304	0.143629	0.467557	0.460999	0.418471	0.460005	0.418919
	448.078	0.749551	427.333	2643.24	974.996	48.3707	0.672351	622.782	4123.95	1553.23	0.0928659	0.38282	0.525251	0.39655	0.394333	0.434331
	487.645	0.749666	408.559	2564.03	943.246	70.1281	0.672435	430.242	3047.95	1246.19	0.11934	0.377625	0.53282	0.395903	0.431777	0.432601
	336.761	0.628309	466.966	2827.44	1333.68	58.6445	0.631897	602.712	3359.89	1516.73	0.145947	0.603344	0.429134	0.428016	0.39576	0.445524
test_2021_07_16_17_54	530.163	0.734259	439.172	2543.69	1028.19	64.2081	0.641117	530.606	3190.96	1414.77	0.104133	0.442589	0.556227	0.386617	0.415281	0.441071
test_2021_07_16_17_55	405.269	0.692505	449.019	2724.52	1149.26	46.7548	0.618777	550.28	3349.7	1475.8	0.102267	0.516668	0.476107	0.41338	0.402998	0.445012
	453.111	0.775093	393.711	2525.81	871.339	69.9443	0.672232	502.03	3061.67	1278.71	0.129377	0.34598	0.556288	0.385911	0.443236	0.433046
	468.104	0.734404	441.462	2690.24	1046.87	60.9505	0.656472	574.837	3338.06	1447.68	0.11374	0.419438	0.52743	0.395116	0.41233	0.436889
	421.012	0.790468	398.538	2503.1	835.175	49.4824	0.677507	496.579	3345.87	1356.27	0.101986	0.317504	0.573448	0.378889	0.422096	0.434031
	396.988	0.778661	415.513	2611.33	899.831	50.5644	0.678234	519.693	3182.51	1303.91	0.11209	0.336257	0.551241	0.385291	0.423287	0.43173
	412.921	0.707262	411.315	2494.55	1010.33	64.8624	0.645779	404.777	2907.87	1252.18	0.130924	0.464552	0.512713	0.407989	0.423506	0.440437
	399.689	0.715158	422.957	2556.95	1025.2	72.5437	0.650659	443.189	3068.48	1239.26	0.139777	0.450093	0.508488	0.406335	0.436184	0.43729
	372.1	0.67835	443.397	2682.6	1159.33	46.0048	0.611528	447.758	3042.73	1367.86	0.106322	0.547942	0.473215	0.417321	0.398811	0.450169
	364.288	0.680043	408.153	2660.7	1121.89	105.017	0.672516	487.575	2923.15	1241.01	0.218997	0.481447	0.463915	0.417987	0.442749	0.434366
test_2021_07_30_14_46	421.738	0.726026	420.653	2533.37	996.743	56.4604	0.659067	451.269	2987.96	1267.22	0.114902	0.426052	0.518366	0.402519	0.423001	0.438729
test_2021_07_30_14_48	422.786	0.729586	425.439	2569.64	1001.5	62.8673	0.678303	432.033	3147.01	1230.81	0.124262	0.405216	0.520249	0.402261	0.421425	0.434837
	378.593	0.690329	413.414	2587.2	1080.3	44.273	0.692416	421.24	3252.24	1225.4	0.103839	0.456262	0.486629	0.414596	0.417623	0.42871
	402.627	0.673712	439.701	2629.9	1149.69	59.3238	0.647695	458.722	3158.42	1289.46	0.117278	0.5212	0.479626	0.418303	0.415121	0.440555
test_2021_07_30_14_46	341.161	0.693102	444.532	2709.24	1130	38.8011	0.657821	421.56	2922.45	1232.74	0.104255	0.476906	0.477719	0.414021	0.427977	0.438083
test_2021_07_30_14_48	272.647	0.715612	421.684	2660.7	1048.46	28.0603	0.670841	518.626	3401.23	1248.64	0.095371	0.440779	0.501031	0.408027	0.427052	0.436865
	375.12	0.691843	409.695	2628.42	1084.32	52.9733	0.625167	588.8	3969.31	1550.88	0.112524	0.510156	0.483649	0.414392	0.397549	0.444444
test_2021_07_30_14_50	348.336	0.677347	373.645	2475.89	1043.13	38.6	0.63197	573.335	3214.69	1514.21	0.0992175	0.519562	0.487672	0.418196	0.399652	0.44456
test_2021_07_30_14_52	294.875	0.718063	355.028	2430.48	937.394	27.5	0.643397	742.246	4021.83	1525.57	0.0852305	0.490594	0.514194	0.407641	0.387337	0.440224
	331.635	0.70443	363.003	2342.3	946.943	41.4781	0.688759	518.637	3730.84	1419.42	0.111418	0.439205	0.513226	0.407513	0.40174	0.429949
	351.245	0.680092	338.768	2285.19	954.579	63.3368	0.642904	529.059	3604.75	1440.12	0.137205	0.514969	0.487184	0.415581	0.413763	0.441446
test_2021_07_16_17_57	362.491	0.681238	348.835	2386.97	988.604	43.7944	0.640972	590.88	3067.58	1409.74	0.106182	0.51665	0.476883	0.416216	0.428642	0.448412
test_2021_07_16_17_59	317.176	0.690597	367.765	2361.04	982.869	38.5882	0.624545	632.146	3421.7	1607.95	0.106099	0.510279	0.496516	0.414653	0.375921	0.452112
	290.868	0.657916	333.505	2400.83	1028.33	53.7053	0.614234	585.188	3094.22	1491.92	0.17258	0.587498	0.469598	0.423275	0.400712	0.448381
	404.857	0.731357	343.968	2423.65	896.785	49.9156	0.660443	570.657	3292.58	1414.03	0.106318	0.416349	0.508482	0.401798	0.413695	0.438493
	356.581	0.733238	317.085	2156.69	806.622	37.2877	0.671385	510.434	3452.88	1381.2	0.096083	0.404849	0.53988	0.397694	0.401462	0.437709
	270.676	0.732715	340.718	2443.01	898.861	29.8981	0.668841	559.828	3652.26	1440.8	0.0994584	0.412608	0.520867	0.402492	0.400742	0.43644
	404.657	0.699162	369.385	2398.22	971.186	54.2103	0.626825	559.071	3359.01	1547.02	0.115155	0.489872	0.502005	0.41106	0.395699	0.444529
	308.009	0.691669	332.771	2306.17	933.466	68.9771	0.652779	497.471	3322.86	1360.66	0.181617	0.487723	0.481485	0.413045	0.418832	0.438797
	354.927	0.699713	398.24	2587.36	1048.98	35.3049	0.605328	449.568	3276.24	1377.68	0.0907694	0.513249	0.481165	0.413065	0.402148	0.448313
	379.173	0.732287	366.525	2365.35	901.397	43.6316	0.625279	458.038	3307.25	1392	0.10027	0.448046	0.52107	0.3983	0.407333	0.443884
	423.254	0.734149	321.601	2180.92	817.014	77.8794	0.619265	504.077	3419.27	1456.86	0.163163	0.442298	0.529453	0.396406	0.401311	0.444999
	341.538	0.697628	371.078	2544.17	1020.05	53.9289	0.673133	475.431	3113.22	1289.52	0.126483	0.457335	0.4838	0.412917	0.434494	0.436713
	323.21	0.680256	349.127	2317.93	968.709	46.8364	0.637038	513.578	3780.4	1473.32	0.126167	0.522769	0.486343	0.416031	0.388024	0.44113
	367.916	0.664112	359.242	2346.44	1021.96	59.2105	0.639409	476.623	2976.54	1302.1	0.129626	0.54674	0.476638	0.421682	0.419559	0.437106
	330.953	0.649602	361.42	2400.95	1063.76	39.7402	0.688254	489.297	3704.99	1282.77	0.107102	0.524261	0.476065	0.423468	0.414533	0.433088
	352.992	0.667305	366.799	2350.15	1019.38	43.5	0.686449	490.52	4208.7	1368.66	0.113649	0.496746	0.489573	0.417472	0.411141	0.429627
	375.356	0.654803	345.662	2269.6	1005.12	46.178	0.667628	404.849	3007.64	1210.29	0.106847	0.532927	0.490728	0.421041	0.435462	0.435495
	325.557	0.666551	367.246	2281.17	1001.87	41.6435	0.662989	472.876	3240.19	1339.27	0.111302	0.517732	0.495138	0.417554	0.394058	0.439877
	349.955	0.714214	354.27	2334.74	910.787	43.2632	0.665617	488.549	3679.51	1369.55	0.10847	0.440011	0.517154	0.405655	0.415694	0.438106
	409.74	0.710556	364.222	2279.46	918.439	53.4009	0.65048	531.13	3330.72	1424.27	0.111899	0.461359	0.518518	0.403603	0.410345	0.438464
	339.868	0.623162	411.809	2482.83	1181.51	44.2263	0.665714	546.661	3399.76	1378.41	0.112492	0.590853	0.458023	0.429525	0.414922	0.440311
	351.865	0.708863	352.111	2277.22	904.921	36.3846	0.651718	498.115	3615.64	1393.49	0.0937313	0.464195	0.514383	0.40494	0.406777	0.435736
	371.742	0.703739	349.856	2378.43	948.564	37.9101	0.648568	401.74	2919.2	1234.66	0.0926588	0.466806	0.500706	0.409145	0.416365	0.443302
	361.08	0.666657	380.442	2435.26	1057.9	51.095	0.677817	557.754	3467.93	1381.36	0.11935	0.508729	0.480417	0.420025	0.422897	0.434431
	356.167	0.698164	348.714	2252.71	916.273	45.5575	0.660736	440.548	3355.89	1307.9	0.113845	0.471284	0.513377	0.407797	0.406803	0.436403
test_2021_07_30_14_50	311.302	0.700675	392.087	2382.65	985.413	36.956	0.682392	553.282	3598.15	1350.69	0.103378	0.455166	0.51632	0.407095	0.407701	0.434379
test_2021_07_30_14_52	303.249	0.680469	376.277	2451.5	1028.92	37.9769	0.666531	527.915	3365.18	1374.91	0.111326	0.494993	0.478818	0.416672	0.408721	0.437858
test_2021_07_30_14_50	315.581	0.681563	353.139	2348.72	983.414	48.8597	0.655258	466.654	3227.18	1270.86	0.135527	0.502154	0.492741	0.416257	0.42053	0.438894
test_2021_07_30_14_52	315.657	0.749004	367.867	2380.56	873.334	34.1667	0.622543	432.01	3112.65	1257.65	0.0971117	0.415085	0.543085	0.392362	0.415169	0.442627
	321.435	0.666915	354.249	2321.58	999.715	48.4304	0.667042	489.532	3554.06	1348.39	0.134035	0.514277	0.481646	0.419504	0.411527	0.434695
	346.416	0.662627	365.371	2434.98	1054.04	42.5838	0.649932	456.153	3559.27	1372.17	0.111404	0.535837	0.474299	0.421838	0.392014	0.440612
	272.149	0.669087	375.656	2415.53	1038.38	33.4474	0.649323	528.361	4668.86	1542.04	0.117311	0.531356	0.477082	0.41613	0.379216	0.437787
	362.491	0.681238	348.835	2386.97	988.604	43.7944	0.640972	590.88	3067.58	1409.74	0.106182	0.51665	0.476883	0.416216	0.428642	0.448412
test_2021_07_30_14_54	335.136	0.648603	410.415	2569.6	1157.11	42.5926	0.629603	578.375	3344.86	1533.35	0.111112	0.581631	0.456699	0.423919	0.418316	0.434131
test_2021_07_30_14_55	289.159	0.678467	392.061	2492.49	1055.74	36.7941	0.680837	608.99	3930.53	1540.38	0.109081	0.492302	0.490163	0.415043	0.401505	0.421696
test_2021_07_16_18_00	349.522	0.705604	393.942	2451.25	993.383	40.2319	0.630499	558.576	3369.39	1537.92	0.0999506	0.480336	0.496202	0.408495	0.406597	0.438644
test_2021_07_16_18_02	284.636	0.717352	395.078	2391.45	959.799	24.4773	0.680201	525.48	3247.45	1350.62	0.0785875	0.425126	0.519844	0.403833	0.434537	0.428327
	328	0.7281	376.226	2424.21	925.548	35.3439	0.659263	547.488	3483.16	1413.57	0.0965857	0.42461	0.512779	0.402409	0.419044	0.435589
	364.035	0.703097	386.556	2363.27	964.592	52.0149	0.639727	576.891	3546.88	1469.99	0.114168	0.476845	0.500114	0.409182	0.42185	0.434062
	313.345	0.706042	388.06	2526.46	1010.89	37.2339	0.62211	622.307	3287.23	1559.83	0.104283	0.491829	0.496679	0.410016	0.407273	0.441899
	329.239	0.754292	408.064	2453.6	907.694	36.6513	0.657515	605.354	3824.62	1483.86	0.0987846	0.38895	0.546777	0.389848	0.405316	0.42758
	380.702	0.680209	374.151	2427.11	1026.34	41.4817	0.650676	598.952	3922.13	1511.88	0.0945646	0.50922	0.484122	0.417214	0.429813	0.435146
	330.35	0.71752	385.058	2505.36	977.059	39.4768	0.656041	547.818	3904.21	1443.4	0.103661	0.442516	0.500726	0.407906	0.426002	0.435547
	371.479	0.706079	373.399	2284.9	930.802	48.1538	0.637552	523.175	3884.75	1509.63	0.111239	0.483281	0.512869	0.40546	0.415493	0.430966
	357.188	0.685182	377.147	2388.44	1004.06	48.2849	0.677644	524.327	3463.41	1398.45	0.113156	0.478535	0.487295	0.414846	0.415411	0.42647
	369.64	0.66767	388.091	2431.77	1060.61	41.16	0.66628	580.057	3669.14	1446.95	0.0968919	0.515263	0.475403	0.419574	0.418989	0.42962
	356.813	0.724602	374.717	2481.08	951.135	42.0258	0.662521	616.487	3670.43	1499.61	0.102929	0.430696	0.502241	0.404532	0.417921	0.430003
	366.137	0.723956	365.727	2418.28	926.352	44.8069	0.667507	567.018	3865.55	1452.06	0.103682	0.427048	0.508405	0.402837	0.419472	0.429658
	333.599	0.667912	386.605	2389.63	1044.45	36.6667	0.640707	532.096	3896.53	1470.93	0.0959694	0.538079	0.483482	0.418557	0.415088	0.436078
	343.661	0.715602	358.874	2344.91	915.99	39.1525	0.661332	595.511	3756.32	1465.91	0.0987843	0.451751	0.518119	0.404593	0.409892	0.429267
	348.099	0.648956	370.903	2459.5	1096.39	41.6337	0.661177	583.464	3450.07	1459.54	0.104545	0.552751	0.458687	0.425181	0.415208	0.43065
	330.946	0.643368	366.446	2369.48	1074.06	43.2907	0.62378	593.395	3364.32	1536.02	0.111974	0.591654	0.475855	0.423684	0.408893	0.441195
	251.871	0.673413	401.013	2586.26	1095.32	32.6129	0.694435	552.263	3818.01	1401.67	0.116157	0.488109	0.469647	0.416607	0.388707	0.413299
	321.179	0.691854	396.485	2773.51	1124.77	81.7308	0.667613	558.739	3486.66	1446.21	0.151566	0.475478	0.456907	0.415468	0.411176	0.428691
	344.074	0.708841	352.454	2496.2	969.341	117.634	0.647554	552.759	3410.12	1441.02	0.181452	0.470495	0.486419	0.408755	0.409424	0.433052
	404.693	0.729549	412.528	2633.51	1008.09	43.1364	0.6098	611.569	3751.17	1610.08	0.0928949	0.464891	0.500933	0.402703	0.408189	0.444868
	387.417	0.731591	358.664	2386.08	898.191	48.4232	0.654297	452.538	3300	1350.55	0.105997	0.4219	0.519018	0.400195	0.401179	0.432244
	401.206	0.636101	418.249	2481.02	1160.73	52.8452	0.647587	420.158	3075.52	1309.81	0.117086	0.572632	0.474996	0.427872	0.410985	0.436256
test_2021_07_30_14_54	348.936	0.687945	396.619	2468.35	1039.17	47.6733	0.676055	482.83	3118.24	1276.5	0.120185	0.475393	0.49253	0.413887	0.433886	0.42744
test_2021_07_30_14_55	381.786	0.718617	371.434	2503.72	967.757	47.3333	0.656358	493.668	3107.46	1303.18	0.11014	0.442565	0.503078	0.405567	0.428786	0.431202
	356.981	0.713827	375.483	2392.01	942.826	44.9952	0.653612	491.354	3210.66	1296.4	0.109605	0.452436	0.514837	0.405126	0.421999	0.433057
	365.645	0.640125	423.372	2569.26	1183.08	44.2384	0.637769	495.053	3244.52	1351.15	0.108477	0.591326	0.46696	0.427462	0.405161	0.438233
	389.005	0.704758	381.382	2396.17	966.354	52.3824	0.681919	526.494	3605.44	1381.24	0.119174	0.446117	0.508712	0.408825	0.414084	0.422896
	375.257	0.692976	329.177	2305.16	927.904	136.619	0.653283	431.854	2673.2	1168.12	0.259806	0.479126	0.485173	0.413704	0.465183	0.431066
	312.753	0.695824	373.689	2302.52	953.24	42.1421	0.652953	446.06	3124.77	1287.6	0.121106	0.481865	0.522477	0.40914	0.424484	0.432103
	341.495	0.68943	381.465	2467.42	1019.83	45.1142	0.671389	418.26	3114.67	1151.1	0.115925	0.479206	0.488175	0.414618	0.466453	0.427296
test_2021_07_30_14_54	329.843	0.690697	400.46	2410.18	1012.34	38.5702	0.698765	435.368	3708.4	1267.28	0.105807	0.453504	0.50127	0.411827	0.408446	0.423478
test_2021_07_30_14_55	289.159	0.678467	392.061	2492.49	1055.74	36.7941	0.680837	608.99	3930.53	1540.38	0.109081	0.492302	0.490163	0.415043	0.401505	0.421696
test_2021_07_30_14_58	283.36	0.645267	407.075	2551.18	1151.76	38.2134	0.664851	464.757	3584.75	1436.32	0.120699	0.547634	0.453565	0.423675	0.363882	0.437521
test_2021_07_30_15_00	232.333	0.701296	384.866	2474.12	1002.32	30.0108	0.614553	568.778	3963.68	1584.82	0.116228	0.506877	0.497109	0.411658	0.386796	0.444808
test_2021_07_16_18_04	277.07	0.6847	391.49	2489.18	1042.19	46.3099	0.605266	469.922	3517.55	1535.71	0.146283	0.537448	0.482568	0.414114	0.370197	0.44911
test_2021_07_16_18_05	296.56	0.677155	373.262	2349.54	999.902	47.8395	0.61623	516.481	3428.55	1473.37	0.133556	0.547209	0.498405	0.415599	0.390455	0.44878
	192.622	0.714269	358.47	2586.81	984.235	44.2017	0.675003	459.159	3070.53	1225.9	0.18907	0.438236	0.494135	0.408559	0.44337	0.434983
	344.357	0.680059	395.093	2668.14	1113.85	42.8214	0.619897	608.602	4130.48	1550.18	0.108896	0.542078	0.455633	0.418914	0.39866	0.447261
	261.555	0.666333	383.761	2582.81	1105.46	38.1759	0.643774	491.327	3125.29	1344.32	0.128318	0.540113	0.462148	0.422115	0.410641	0.443579
	380.5	0.741828	352.9	2321.36	855.37	44.2483	0.655974	538.676	3191.74	1389.17	0.103495	0.407405	0.54284	0.396654	0.396849	0.442944
	350.987	0.718602	342.512	2336.64	897.455	41.954	0.626411	532.161	3006.87	1405.86	0.106311	0.463472	0.519163	0.404175	0.411351	0.447892
	297.324	0.683999	365.117	2450.9	1024.49	41.8187	0.635914	643.63	3508.33	1562.09	0.12156	0.51051	0.485256	0.415449	0.392735	0.444952
	178.689	0.701947	371.701	2570.26	1020.74	28.3115	0.627	631.242	3164.06	1531.28	0.138669	0.484062	0.489754	0.413437	0.399443	0.450058
	275.768	0.663698	379.638	2553.57	1095.64	40.2216	0.629311	579.422	3278.26	1488.63	0.129854	0.556367	0.462231	0.420797	0.396154	0.445327
	265.112	0.805215	403.321	2583.21	819.092	46.6974	0.659395	545.262	3310.61	1399.09	0.129967	0.304546	0.580042	0.371785	0.414148	0.442525
	329.549	0.686956	358.253	2385.91	983.158	43.6209	0.64811	411.347	3018.86	1275.91	0.116838	0.496174	0.500123	0.413992	0.415226	0.443921
	270.126	0.706676	420.493	2520.18	1029.15	36.8526	0.631984	546.496	3326.47	1460.74	0.120789	0.486627	0.512095	0.410427	0.402035	0.439177
	310.873	0.705585	354.136	2145.39	875.143	38.7034	0.631783	512.747	3405.98	1378.71	0.110252	0.485188	0.527703	0.402561	0.391366	0.44385
	322.221	0.761668	389.67	2565.76	901.143	42.9559	0.609632	531.727	3281	1466.71	0.112474	0.403995	0.53324	0.391903	0.413929	0.447212
	391.792	0.731698	367.63	2342.27	891.359	52.6615	0.637055	415.294	2947	1294.58	0.115425	0.431792	0.534373	0.399745	0.409442	0.441439
	335.221	0.692422	369.58	2417.74	991.113	41.675	0.640859	466.505	3210.71	1343.91	0.108825	0.496512	0.494313	0.413102	0.396635	0.444217
test_2021_07_30_14_58	353.559	0.677093	372.015	2466.7	1041.59	44.2394	0.637761	481.973	3061.51	1303.08	0.108995	0.5266	0.48066	0.417697	0.402321	0.444142
test_2021_07_30_15_00	333.461	0.696836	351.76	2345.72	945.184	48.9843	0.640065	487.791	3133.29	1390.74	0.127198	0.489194	0.512472	0.410208	0.388945	0.441613
	295.154	0.691574	369.322	2363.19	977.635	38.2353	0.623477	532.592	2892.19	1341.08	0.11791	0.510579	0.496009	0.411057	0.400474	0.449055
	310.94	0.741033	357.433	2265.54	851.498	41.8557	0.624736	465.326	2854.73	1312.02	0.118445	0.429512	0.547305	0.392289	0.408003	0.450499
	366.199	0.735414	338.124	2268.61	848.311	41.2694	0.629153	479.214	3183.47	1293.27	0.0998608	0.439062	0.544111	0.396136	0.40334	0.446976
	344.363	0.678815	360.896	2412.73	1015.6	45.1744	0.606912	551.786	3501.62	1470.61	0.116346	0.549236	0.487329	0.417504	0.400921	0.45112
	348.073	0.696787	361.403	2384.64	974.21	42.7294	0.655608	450.378	3543.98	1301.17	0.110865	0.47585	0.505467	0.409136	0.420763	0.442981
	290.463	0.663734	374.354	2424.12	1058.81	37.6748	0.592137	514.159	2830.88	1383.96	0.116978	0.592456	0.471963	0.421393	0.383755	0.452632
	352.074	0.716445	368.313	2402.24	935.423	47.716	0.585583	397.537	2785.94	1341.33	0.119909	0.502158	0.510847	0.405224	0.396814	0.458296
	329.951	0.759999	355.792	2239.98	803.377	34.8374	0.635623	353.022	2865.51	1208.26	0.0954726	0.388968	0.563106	0.385983	0.405953	0.44369
	316.554	0.663501	363.287	2509.68	1080.21	44.5833	0.630023	356.219	2756.19	1190.94	0.124857	0.553606	0.468481	0.421184	0.417505	0.450155
	331.209	0.660753	363.107	2447.32	1062.9	48.9925	0.615201	493.789	3120.66	1452.21	0.126174	0.568446	0.46756	0.42104	0.397126	0.448918
	341.332	0.653454	365.079	2471.17	1088.57	45.6747	0.633852	479.621	3057.8	1351.63	0.116094	0.56758	0.473429	0.422803	0.403878	0.443889
	299.353	0.675336	374.872	2517.8	1064.55	41.4655	0.619367	400.091	2912.63	1332.92	0.120043	0.534314	0.473538	0.418772	0.37643	0.454449
test_2021_07_30_14_58	379.288	0.663022	379.382	2388.62	1053.64	52.3702	0.629359	419.401	2905.26	1297.57	0.118355	0.54709	0.479461	0.419559	0.405137	0.446968
test_2021_07_30_15_00	297.481	0.669245	401.071	2560.24	1105.61	56.0515	0.624267	450.194	3158.7	1392.6	0.161723	0.542692	0.47711	0.420324	0.390906	0.448651
	271.881	0.676847	382.65	2506.8	1058.85	43.4337	0.611014	507.712	3174.13	1481.32	0.14313	0.543237	0.478374	0.417879	0.379939	0.45391
	338.514	0.754241	335.479	2193.45	791.657	44.095	0.677551	385.078	2854.73	1129.59	0.115073	0.373237	0.559273	0.388368	0.409727	0.442841
	266.344	0.691427	340.55	2220.34	913.816	33.3841	0.661257	411.238	3316.6	1354.74	0.113846	0.476473	0.514733	0.410768	0.372713	0.439017
	347.679	0.700879	366.236	2489.18	993.05	45.5675	0.630761	496.533	3071.89	1384.94	0.11502	0.488705	0.488128	0.412057	0.411977	0.448261
	323.75	0.663127	348.102	2346.71	1015.08	44.8021	0.620133	421.335	3071.65	1368.14	0.12721	0.563616	0.481882	0.420377	0.386108	0.449669
	353.49	0.70398	356.762	2429.27	962.764	43.5753	0.601988	519.036	3637.8	1490.89	0.109318	0.51216	0.499142	0.409266	0.394375	0.449457
	299.833	0.654254	398.666	2586.25	1143.2	38.798	0.622545	430.082	3668.12	1353.72	0.117182	0.571586	0.464989	0.422166	0.394739	0.45127
	327.716	0.710717	370.142	2451.24	967.453	41.0662	0.62607	440.708	2905.24	1310.44	0.113606	0.475818	0.507445	0.407463	0.40191	0.450613
	327.054	0.695715	360.872	2494.94	1001.44	45.1159	0.633816	516.25	2838.29	1277.75	0.120591	0.491983	0.48638	0.41316	0.419629	0.445518
	305.442	0.64836	398.403	2497.93	1134.1	47.3807	0.623166	388.056	3081.93	1286.45	0.13224	0.590664	0.468353	0.424444	0.39894	0.450296
	332.263	0.628258	383.727	2478.23	1155.19	50.373	0.654421	386.298	2926.22	1216.5	0.131139	0.579186	0.458573	0.429785	0.414621	0.442969
	293.69	0.67116	358.89	2398.79	1024.3	39.1359	0.653463	424.415	2980.6	1256.67	0.119913	0.51761	0.483719	0.41887	0.399941	0.439899
	345.294	0.723064	330.328	2285.19	869.891	108.042	0.621392	409.182	2679.16	1224.44	0.215304	0.456535	0.514196	0.403563	0.422062	0.449808
	294.712	0.704554	386.581	2517.32	1010.83	44.3214	0.679347	392.618	2998.29	1140.04	0.128371	0.44829	0.503768	0.409492	0.427656	0.434236
	322.221	0.761668	389.67	2565.76	901.143	42.9559	0.609632	531.727	3281	1466.71	0.112474	0.403995	0.53324	0.391903	0.413929	0.447212
	391.792	0.731698	367.63	2342.27	891.359	52.6615	0.637055	415.294	2947	1294.58	0.115425	0.431792	0.534373	0.399745	0.409442	0.441439
	335.221	0.692422	369.58	2417.74	991.113	41.675	0.640859	466.505	3210.71	1343.91	0.108825	0.496512	0.494313	0.413102	0.396635	0.444217
	353.559	0.677093	372.015	2466.7	1041.59	44.2394	0.637761	481.973	3061.51	1303.08	0.108995	0.5266	0.48066	0.417697	0.402321	0.444142
	333.461	0.696836	351.76	2345.72	945.184	48.9843	0.640065	487.791	3133.29	1390.74	0.127198	0.489194	0.512472	0.410208	0.388945	0.441613
	295.154	0.691574	369.322	2363.19	977.635	38.2353	0.623477	532.592	2892.19	1341.08	0.11791	0.510579	0.496009	0.411057	0.400474	0.449055
	310.94	0.741033	357.433	2265.54	851.498	41.8557	0.624736	465.326	2854.73	1312.02	0.118445	0.429512	0.547305	0.392289	0.408003	0.450499
	366.199	0.735414	338.124	2268.61	848.311	41.2694	0.629153	479.214	3183.47	1293.27	0.0998608	0.439062	0.544111	0.396136	0.40334	0.446976
	344.363	0.678815	360.896	2412.73	1015.6	45.1744	0.606912	551.786	3501.62	1470.61	0.116346	0.549236	0.487329	0.417504	0.400921	0.45112
	348.073	0.696787	361.403	2384.64	974.21	42.7294	0.655608	450.378	3543.98	1301.17	0.110865	0.47585	0.505467	0.409136	0.420763	0.442981
	290.463	0.663734	374.354	2424.12	1058.81	37.6748	0.592137	514.159	2830.88	1383.96	0.116978	0.592456	0.471963	0.421393	0.383755	0.452632
	352.074	0.716445	368.313	2402.24	935.423	47.716	0.585583	397.537	2785.94	1341.33	0.119909	0.502158	0.510847	0.405224	0.396814	0.458296
	329.951	0.759999	355.792	2239.98	803.377	34.8374	0.635623	353.022	2865.51	1208.26	0.0954726	0.388968	0.563106	0.385983	0.405953	0.44369
	316.554	0.663501	363.287	2509.68	1080.21	44.5833	0.630023	356.219	2756.19	1190.94	0.124857	0.553606	0.468481	0.421184	0.417505	0.450155
	331.209	0.660753	363.107	2447.32	1062.9	48.9925	0.615201	493.789	3120.66	1452.21	0.126174	0.568446	0.46756	0.42104	0.397126	0.448918
	341.332	0.653454	365.079	2471.17	1088.57	45.6747	0.633852	479.621	3057.8	1351.63	0.116094	0.56758	0.473429	0.422803	0.403878	0.443889
	299.353	0.675336	374.872	2517.8	1064.55	41.4655	0.619367	400.091	2912.63	1332.92	0.120043	0.534314	0.473538	0.418772	0.37643	0.454449
	379.288	0.663022	379.382	2388.62	1053.64	52.3702	0.629359	419.401	2905.26	1297.57	0.118355	0.54709	0.479461	0.419559	0.405137	0.446968
	297.481	0.669245	401.071	2560.24	1105.61	56.0515	0.624267	450.194	3158.7	1392.6	0.161723	0.542692	0.47711	0.420324	0.390906	0.448651
	271.881	0.676847	382.65	2506.8	1058.85	43.4337	0.611014	507.712	3174.13	1481.32	0.14313	0.543237	0.478374	0.417879	0.379939	0.45391
	338.514	0.754241	335.479	2193.45	791.657	44.095	0.677551	385.078	2854.73	1129.59	0.115073	0.373237	0.559273	0.388368	0.409727	0.442841
	266.344	0.691427	340.55	2220.34	913.816	33.3841	0.661257	411.238	3316.6	1354.74	0.113846	0.476473	0.514733	0.410768	0.372713	0.439017
	347.679	0.700879	366.236	2489.18	993.05	45.5675	0.630761	496.533	3071.89	1384.94	0.11502	0.488705	0.488128	0.412057	0.411977	0.448261
	323.75	0.663127	348.102	2346.71	1015.08	44.8021	0.620133	421.335	3071.65	1368.14	0.12721	0.563616	0.481882	0.420377	0.386108	0.449669
	353.49	0.70398	356.762	2429.27	962.764	43.5753	0.601988	519.036	3637.8	1490.89	0.109318	0.51216	0.499142	0.409266	0.394375	0.449457
	299.833	0.654254	398.666	2586.25	1143.2	38.798	0.622545	430.082	3668.12	1353.72	0.117182	0.571586	0.464989	0.422166	0.394739	0.45127
	327.716	0.710717	370.142	2451.24	967.453	41.0662	0.62607	440.708	2905.24	1310.44	0.113606	0.475818	0.507445	0.407463	0.40191	0.450613
	327.054	0.695715	360.872	2494.94	1001.44	45.1159	0.633816	516.25	2838.29	1277.75	0.120591	0.491983	0.48638	0.41316	0.419629	0.445518
	305.442	0.64836	398.403	2497.93	1134.1	47.3807	0.623166	388.056	3081.93	1286.45	0.13224	0.590664	0.468353	0.424444	0.39894	0.450296
	332.263	0.628258	383.727	2478.23	1155.19	50.373	0.654421	386.298	2926.22	1216.5	0.131139	0.579186	0.458573	0.429785	0.414621	0.442969
	293.69	0.67116	358.89	2398.79	1024.3	39.1359	0.653463	424.415	2980.6	1256.67	0.119913	0.51761	0.483719	0.41887	0.399941	0.439899
	345.294	0.723064	330.328	2285.19	869.891	108.042	0.621392	409.182	2679.16	1224.44	0.215304	0.456535	0.514196	0.403563	0.422062	0.449808
	294.712	0.704554	386.581	2517.32	1010.83	44.3214	0.679347	392.618	2998.29	1140.04	0.128371	0.44829	0.503768	0.409492	0.427656	0.434236

## Sheet: Cyanide
Unnamed: 0	NADH.Intensity	NADH.a1	NADH.t1	NADH.t2	NADH.FLIM	FAD.Intensity	FAD.a1	FAD.t1	FAD.t2	FAD.FLIM	Redox.Ratio	FLIRR	NADH.G	NADH.S	FAD.G	FAD.S
test_2021_07_11_17_31	350.679	0.731786	354.815	2093.25	807.616	39.7821	0.618308	558.28	3050.67	1416.27	0.1058	0.452744	0.560075	0.392855	0.372675	0.485984
test_2021_07_11_17_33	420.637	0.746393	356.412	2151.44	801.72	61.2375	0.645422	536.989	3075.17	1361.41	0.122369	0.403501	0.558066	0.38992	0.391471	0.474076
	432.489	0.732125	358.582	2227.05	853.615	66.1984	0.622111	507.886	2944.61	1374.82	0.126788	0.446357	0.540687	0.397359	0.380768	0.479519
	460.386	0.768239	379.927	2158.96	786.548	48.3307	0.657823	446.021	2961.3	1231.6	0.0928745	0.366805	0.580123	0.380847	0.397657	0.472587
	435.417	0.728227	373.973	2207.51	863.9	51.2894	0.641896	495.135	3033.42	1334.81	0.106806	0.440497	0.542943	0.398369	0.395317	0.475757
	411.613	0.692783	348.954	2197.83	904.875	50.1667	0.619109	424.843	2614	1196.72	0.110324	0.523931	0.50443	0.40967	0.406657	0.474326
	425.074	0.741608	378.411	2238.24	849.437	49.7727	0.627163	529.201	3041.4	1412.24	0.102464	0.431599	0.545383	0.393366	0.377913	0.474094
	463.399	0.743241	353.791	2256.41	834.096	92.2745	0.619035	410.447	2654.4	1234.09	0.146325	0.422419	0.541803	0.392173	0.388063	0.481025
	391.547	0.749766	347.163	2027.45	761.865	52.2376	0.685709	393.64	2972.21	1170.16	0.118571	0.371197	0.579192	0.384806	0.40395	0.466558
	432.792	0.758206	376.338	2259.32	823.427	59.5093	0.604457	434.846	2778.65	1310.09	0.119688	0.419831	0.551797	0.386862	0.392087	0.481077
	276.7	0.740675	341.237	2158.95	795.991	64.5828	0.621726	483.767	2885.2	1321.44	0.231079	0.430198	0.545982	0.392506	0.395979	0.480241
	453.866	0.729792	374.621	2164.12	855.701	61.5587	0.629008	469.124	2961.81	1331.45	0.118381	0.448872	0.552653	0.393318	0.388667	0.476562
	427.219	0.746469	371.943	2176.5	823.022	47.7737	0.5947	661.26	3393.22	1615.58	0.0981363	0.445607	0.5678	0.389976	0.342281	0.483417
	356.209	0.738904	351.973	2088.61	800.636	51.7539	0.621965	484.511	3099.2	1331.03	0.131772	0.437363	0.555629	0.391528	0.374052	0.483646
	504.893	0.754581	377.858	2143.86	806.836	75.9037	0.63166	498.391	3226.5	1346.09	0.125871	0.400401	0.568976	0.387137	0.399059	0.477458
	361.297	0.747857	366.565	2243.1	830.068	38.9569	0.566629	542.121	3147.51	1558.97	0.099959	0.462371	0.559037	0.390102	0.336766	0.488556
	352.14	0.670208	391.062	2469.27	1062.82	54.4203	0.632522	469.587	2914.88	1320.97	0.133423	0.542523	0.483874	0.418119	0.371066	0.479006
	439.906	0.728527	350.163	2127.05	824.6	47.6547	0.63441	509.166	3055.82	1348.49	0.0996608	0.444335	0.54334	0.397376	0.365433	0.477095
	390.224	0.70906	383.984	2404.16	955.761	59.5552	0.611357	350.488	2640.81	1218.57	0.136022	0.486553	0.502028	0.407754	0.372973	0.483603
	396.638	0.755128	406.703	2523.01	915.186	39.6992	0.652724	487.78	3399.51	1397.94	0.0915779	0.39039	0.53167	0.393872	0.374367	0.47103
	371.368	0.732945	377.554	2312.66	880.625	42.3662	0.658138	445.374	3022.28	1247.27	0.104495	0.420702	0.531285	0.39769	0.392853	0.467553
	343.38	0.728444	359.351	2208.87	850.467	48.8665	0.633678	448.274	2764.34	1219.33	0.120089	0.439792	0.542112	0.397361	0.399185	0.480437
	435.425	0.759741	362.819	2150.25	788.474	62.0674	0.628151	425.354	2815.8	1236.73	0.121799	0.395408	0.568154	0.385286	0.409688	0.480005
	432.775	0.735853	382.193	2389.66	905.542	49.3023	0.618036	445.132	2829.55	1304.33	0.101672	0.443058	0.533498	0.397663	0.382255	0.479174
	465.41	0.732705	359.367	2223.07	857.904	68.7245	0.651164	508.9	3287.04	1344	0.128746	0.42135	0.541131	0.395505	0.396614	0.473046
	422.854	0.7357	363.53	2221.41	847.615	57.5366	0.62943	401.261	2800.41	1235.7	0.119935	0.435432	0.550051	0.395759	0.381493	0.476146
	408.411	0.683	391.664	2361.48	1004.31	52.3196	0.635743	422.018	2948.75	1303.29	0.11172	0.504863	0.495185	0.413596	0.356921	0.478901
	432.034	0.762063	361.24	2187.87	791.303	65.4568	0.635823	400.086	2661.11	1166.04	0.137852	0.386139	0.569244	0.383307	0.401076	0.476306
	465.418	0.71992	378.349	2335.27	920.653	65.4396	0.648551	406.932	2753.17	1207.66	0.119444	0.441599	0.51832	0.402777	0.396334	0.477924
	438.858	0.720869	362.175	2267.61	889.353	47.7182	0.666299	401.658	2783.64	1152.14	0.0968363	0.427684	0.518503	0.402192	0.398656	0.469352
	453.537	0.706402	344.685	2234.31	888.921	53.1053	0.636394	509.985	2964.76	1321.18	0.105697	0.478808	0.502763	0.406718	0.387738	0.475156
	411.747	0.725002	371.333	2143.69	854.153	78.7729	0.553634	510.198	2923.16	1494.23	0.162489	0.527197	0.55184	0.39543	0.355936	0.48701
	406.484	0.724103	366.53	2369.92	919.996	141.452	0.637679	392.234	2700.27	1218.85	0.211679	0.477696	0.52552	0.40043	0.40112	0.470962
	434.867	0.73562	359.137	2244.74	848.668	47.1561	0.63944	467.287	2750.41	1224.36	0.0957975	0.428922	0.530406	0.3972	0.3989	0.47514
	341.605	0.669465	336.922	2222.3	954.996	53.2577	0.634777	431.492	2969.51	1271.98	0.148298	0.533243	0.486162	0.414292	0.386548	0.479353
	439.713	0.731548	362.478	2206.48	846.535	69.0495	0.662183	383.428	2684.67	1132.77	0.128475	0.413164	0.54414	0.395403	0.400949	0.472546
	439.013	0.707265	397.284	2432.4	985.775	117.57	0.585153	412.363	2562.52	1295.4	0.177665	0.542115	0.509613	0.406722	0.390698	0.487055
	471.006	0.781549	387.816	2316.86	803.655	55.4828	0.644875	355.237	2639.62	1131.11	0.106225	0.348909	0.585139	0.378425	0.389208	0.47638
	392.914	0.749174	371.624	2359.79	861.92	53.5115	0.591999	456.514	3057.44	1369.31	0.116966	0.439761	0.538702	0.3931	0.360848	0.483315
	408.303	0.725792	411.654	2555.39	987.92	58.0026	0.64349	337.064	2543.69	1097.32	0.124727	0.434697	0.504597	0.403109	0.399664	0.47701
	415.705	0.718599	399.446	2376.63	945.898	71.5772	0.614004	427.516	2755.58	1280.09	0.142433	0.468674	0.525737	0.40425	0.384587	0.477356
	348.061	0.721752	395.356	2471.59	958.022	68.9307	0.609791	406.893	2649.91	1246.65	0.191776	0.474174	0.51392	0.401654	0.382688	0.48226
	271.654	0.760712	381.897	2330.25	838.102	28.7396	0.637741	484.173	2680.7	1201.69	0.097816	0.395917	0.565055	0.386794	0.382165	0.483225
	461.75	0.771493	392.354	2305.57	821.811	60.3158	0.608552	445.354	2577.36	1241.04	0.110768	0.385687	0.581752	0.382395	0.401189	0.482992
	446.824	0.704166	380.396	2507.71	993.768	56.5649	0.654196	415.111	2825.52	1180.36	0.110138	0.463618	0.482615	0.409668	0.391059	0.474787
	346.513	0.748911	354.661	2280.16	827.096	60.3138	0.647476	368.518	2575.72	1094.68	0.187598	0.403344	0.534498	0.39269	0.389398	0.478131
	402.312	0.726771	384.399	2172.59	860.175	68.4653	0.663423	390.576	2482.09	1063.19	0.143926	0.426773	0.554982	0.393974	0.430895	0.469217
	418.981	0.721364	389.198	2461.19	957.939	55.7834	0.613525	344.763	2680.8	1202.76	0.120557	0.470583	0.502981	0.404528	0.389708	0.483071
	423.163	0.773464	344.499	2038.36	722.559	50.0554	0.710503	376.977	2649.02	974.807	0.10628	0.328799	0.598965	0.376163	0.458351	0.459637
	427.294	0.764148	376.142	2211.15	799.093	43.8037	0.679662	394.984	2789.64	1118.28	0.0921616	0.358992	0.573165	0.383824	0.413111	0.463452
	477.055	0.784615	377.221	2276.58	776.21	88.863	0.667917	407.386	2400.13	1040.51	0.146012	0.328225	0.586096	0.376309	0.461893	0.470616
	413.262	0.761119	374.549	2173.82	798.612	43.8904	0.694604	402.262	2840.88	1097.42	0.0961651	0.354997	0.569467	0.384799	0.425333	0.463867
	344.463	0.74	358.488	2208.37	829.154	39.3287	0.712078	370.558	2648.77	996.414	0.102493	0.369216	0.552101	0.393497	0.444617	0.458465
test_2021_07_11_17_35	405.655	0.713488	392.341	2375.93	951.431	42.8662	0.598672	541.622	3092.13	1517.53	0.0970581	0.49164	0.509898	0.406675	0.344751	0.483047
test_2021_07_11_17_36	461.329	0.723113	348.15	2131.31	836.289	67.875	0.658329	601.446	3109.38	1432.99	0.121672	0.438411	0.536807	0.399631	0.413489	0.467468
	430.061	0.730548	349.657	2215.17	840.267	52.0021	0.669535	571.545	3036.39	1318.25	0.105117	0.416133	0.539012	0.397747	0.437744	0.472777
	341.466	0.684198	353.865	2304.42	960.445	79.2797	0.622634	647.552	3437.97	1610.78	0.188834	0.522626	0.497768	0.413945	0.373583	0.476056
	452.206	0.74664	369.517	2330.04	853.389	40.9688	0.654197	516.971	3072.77	1354.51	0.0857599	0.400876	0.538743	0.394176	0.412003	0.472216
	462.254	0.741059	364.728	2139.63	818.967	48.6228	0.637024	630.875	3544.05	1607.14	0.0952187	0.418092	0.549782	0.392319	0.366005	0.473644
	481.676	0.740463	346.634	2177.86	820.624	76.8592	0.637491	583.508	3119.07	1459.56	0.137781	0.419077	0.553814	0.392639	0.397394	0.475532
	422.568	0.728049	369.064	2297.49	886.015	38.7986	0.690161	607.869	3779.48	1494.38	0.0847637	0.400879	0.522564	0.401692	0.386713	0.463164
	507.599	0.740513	353.713	2118.14	805.263	51.3085	0.637194	545.268	3588.51	1462.86	0.0903232	0.420616	0.557477	0.393121	0.397794	0.474162
	451.585	0.772687	358.842	2269.73	788.505	38.4375	0.627839	618.026	3398.76	1596.58	0.0779744	0.371505	0.567672	0.383714	0.37189	0.473405
	441.191	0.657455	363.156	2290.81	1028	59.5819	0.616393	543.112	3241.35	1505.44	0.119114	0.575114	0.493922	0.417655	0.361039	0.475998
	479.079	0.737506	342.276	2104.61	801.518	47.1405	0.617083	616.263	3360.9	1552.66	0.0908429	0.446622	0.553882	0.393424	0.370603	0.480819
	441.687	0.753233	360.225	2258.28	823.187	54.6616	0.655404	543.444	3352.67	1358.07	0.10103	0.392108	0.556296	0.391571	0.420478	0.472394
	497.109	0.749681	357.19	2196.28	809.107	49.954	0.652721	606.435	4301.82	1685.4	0.0866332	0.39196	0.554593	0.390422	0.353397	0.467992
	359.953	0.750758	397.097	2461.42	899.545	33.1172	0.687908	539.915	3174.94	1299.6	0.0858892	0.372006	0.53073	0.395982	0.425541	0.467069
	405.143	0.733345	341.098	2072.11	797.813	44.354	0.628499	567.134	3353.17	1537.88	0.0994057	0.436038	0.55541	0.394857	0.342578	0.473695
	475.517	0.694401	358.877	2092.63	883.201	65.1697	0.660507	499.333	3066.2	1328.34	0.119387	0.473708	0.536671	0.406227	0.404988	0.470466
	420.69	0.727152	351.493	2120.88	828.688	40.2527	0.651246	654.05	3852.27	1567.11	0.0879068	0.438397	0.53852	0.398257	0.375951	0.469413
	428.595	0.71567	363.614	2303.22	908.031	45.1216	0.655924	564.354	3318.04	1410.18	0.093156	0.450103	0.512435	0.405338	0.40293	0.468449
	328.715	0.742799	364.783	2288.68	850.518	35.5273	0.723295	554.788	3743.16	1298.4	0.0988075	0.366957	0.547134	0.395554	0.414087	0.457089
	452.2	0.709841	329.054	2081.78	830.621	48.8475	0.622599	580.626	3275.55	1496.57	0.0972767	0.487976	0.534537	0.403234	0.359759	0.475437
	650.406	0.741192	344.875	2022.27	772.616	79.8173	0.650519	565.899	3119.57	1435.98	0.10724	0.407569	0.560971	0.38933	0.39594	0.472586
	346.461	0.739405	311.482	2093.71	763.344	58.7587	0.628357	619.075	3335.81	1503.78	0.219802	0.435822	0.541218	0.395332	0.36605	0.480379
	415.388	0.723257	304.938	1977.45	765.182	83.1353	0.659433	474.57	3009.09	1283.33	0.15633	0.428503	0.550707	0.397037	0.408417	0.469781
	453.298	0.741053	364.595	2165.9	821.672	44.466	0.683737	603.894	3708.1	1478.09	0.0889866	0.387336	0.54746	0.392351	0.382676	0.465181
	469.406	0.729886	363.114	2265.76	872.8	45.6606	0.67762	595.295	3520.61	1411.66	0.087046	0.416963	0.5308	0.401329	0.393386	0.462973
	374.759	0.732002	396.101	2433.26	935.634	41.6339	0.687303	505.129	3278.75	1325.02	0.101044	0.398694	0.520179	0.401152	0.412722	0.464412
	548.239	0.731404	356.42	2079.55	814.818	74.7806	0.660433	531.648	3008.85	1342.89	0.119184	0.413686	0.548949	0.395143	0.403305	0.470432
	492.167	0.748939	333.603	1885.71	721.435	36.8485	0.664262	541.792	3170.48	1396.43	0.0680427	0.382768	0.585165	0.381031	0.399641	0.474475
	501.152	0.75039	315.943	1886.61	705.348	37.8913	0.647099	420.541	2986.01	1293.76	0.0703965	0.404841	0.585539	0.381629	0.365524	0.473896
	419.117	0.745104	374.986	2228.64	839.668	61.4609	0.645469	513.091	3412.18	1471.9	0.120474	0.405219	0.546019	0.394106	0.370507	0.467895
	406.914	0.725033	351.232	2171	841.472	44.9113	0.652612	543.942	3427.36	1408.27	0.0959978	0.434765	0.543467	0.398189	0.398365	0.472569
	585.108	0.740712	356.582	1972.28	778.191	69.7102	0.650904	527.82	2995.17	1354.95	0.10604	0.415041	0.574638	0.387383	0.405089	0.473256
	479.505	0.749728	358.624	2222.53	816.705	43.5194	0.637038	541.639	3535.21	1492.16	0.0831342	0.404363	0.553711	0.391422	0.373702	0.475266
	538.393	0.710217	347.916	2094.42	848.615	78.2209	0.581853	660.084	3440.9	1706.15	0.122109	0.514824	0.527288	0.402756	0.345079	0.481281
	496.205	0.743752	356.471	2103.49	799.876	73.4777	0.656452	516.476	3032.14	1344.35	0.126888	0.398929	0.561821	0.390636	0.413478	0.470833
	394.436	0.741148	379.917	2308.36	869.032	40.6323	0.659694	614.695	3349.38	1457.94	0.091701	0.404211	0.531675	0.396034	0.394057	0.469252
	411.531	0.726349	352.348	2147.58	837.878	44.7695	0.653427	486.364	3640.78	1379.48	0.0971315	0.430649	0.540432	0.39861	0.40118	0.470793
	470.621	0.705262	356.995	2243.7	907.202	61.7524	0.623893	593.536	3084.84	1470.11	0.112451	0.490948	0.512135	0.407877	0.38668	0.475258
	525.742	0.732006	368.602	2245.26	864.134	72.2454	0.645319	538.771	3095.25	1415.13	0.119388	0.423424	0.535299	0.398972	0.39417	0.471581
	328.127	0.711262	400.102	2569.64	1019.66	31.8676	0.627172	775.14	3849.71	1727.72	0.0911573	0.481366	0.495129	0.409394	0.345913	0.477972
	544.487	0.688649	339.657	2018.08	859.353	174.194	0.578335	876.207	2881.37	1632.93	0.189602	0.58655	0.522167	0.406884	0.372778	0.48733
	531.752	0.756711	365.354	2190.16	804.21	59.8696	0.602367	553.648	3014.76	1484.18	0.0978377	0.415972	0.564468	0.389646	0.400836	0.483483
	438.47	0.706762	378.485	2368.67	955.052	60.3458	0.618114	528.174	3082.29	1442.14	0.118718	0.48769	0.510033	0.407777	0.382386	0.477512
	488.846	0.7512	343.941	2085.22	771.268	51.3538	0.658084	546.253	3203.16	1395.35	0.0954524	0.387997	0.562788	0.388355	0.397607	0.468533
	517.321	0.739578	356.165	2129.58	813.493	71.1967	0.649327	505.488	3046.36	1331.57	0.120305	0.412533	0.556859	0.393025	0.406889	0.472215
	473.587	0.723715	379.668	2310.53	906.735	64.0015	0.64102	511.567	3061.41	1363.33	0.114214	0.446781	0.521024	0.402515	0.388971	0.472836
	443.641	0.700007	307.751	1936.9	793.916	62.3516	0.657946	610.755	3315.2	1494.41	0.119205	0.460848	0.530551	0.402985	0.400547	0.477947
	442.084	0.767542	332.648	2088.29	746.665	62.2596	0.675547	465.886	3224.46	1297.1	0.163934	0.362475	0.583726	0.377118	0.389349	0.467716
	415.995	0.731123	357.359	2194.77	844.058	63.6484	0.67814	408.627	2818.31	1159.46	0.143537	0.401881	0.542256	0.398822	0.416359	0.468477
	518.03	0.745258	345.456	2020.27	769.216	65.3232	0.704064	447.986	3021.87	1143.56	0.112059	0.368237	0.578769	0.388243	0.441939	0.459432
	519.673	0.763552	346.544	2094.64	750.418	78.023	0.697983	428.27	2761.72	1109.12	0.126761	0.343604	0.583713	0.382525	0.449484	0.461758
	516.565	0.746075	363.286	2184.48	821.27	66.172	0.649672	545.942	3139.03	1396.02	0.110576	0.401901	0.543497	0.394191	0.409907	0.472947
	458.165	0.719066	362.915	2216.67	876.134	51.3022	0.663121	501.733	3015.66	1316.81	0.100836	0.43242	0.532313	0.402556	0.399378	0.470126
	413.321	0.713395	312.307	2036.42	805.15	116.776	0.626908	507.276	3074.44	1406.57	0.206156	0.471817	0.534241	0.402073	0.374397	0.474988
	495.349	0.730792	348.668	2194.3	839.938	77.0534	0.630956	502.856	2985.56	1369.76	0.133668	0.439123	0.539378	0.399137	0.391971	0.476578
	452.149	0.741221	357.027	2222.21	836.385	71.2343	0.654361	451.429	2880.88	1250.45	0.141541	0.403081	0.53862	0.395615	0.401037	0.469828
	505.312	0.734395	360.052	2141.22	824.628	57.3618	0.624333	391.759	2756.38	1232.76	0.0972894	0.443146	0.551752	0.394931	0.395846	0.47396
	325.672	0.714952	373.074	2347.22	932.47	44.2902	0.651393	441.772	3204.93	1348.87	0.122775	0.450694	0.516795	0.402953	0.36958	0.470203
	469.052	0.744644	353.035	2131.57	800.722	74.7637	0.686593	446.982	3015.57	1214.37	0.139585	0.378119	0.560704	0.391254	0.417845	0.463958
	505.516	0.707903	376.624	2340.51	948.089	70.3989	0.664824	538.979	3119.34	1346.97	0.114328	0.446623	0.513936	0.408744	0.400616	0.467349
	459.694	0.708302	358.349	2287	913.841	59.3143	0.607742	501.534	2886.42	1389.37	0.107731	0.494709	0.516568	0.407338	0.374087	0.481949
	425.336	0.745967	352.869	2171.45	807.208	54.7523	0.658281	433.095	2977.79	1264.05	0.115869	0.392976	0.54845	0.392132	0.397387	0.469391
	487.658	0.763076	374.521	2247.65	816.952	59.4535	0.631749	456.155	3016.33	1359.54	0.106299	0.38649	0.567251	0.385229	0.380942	0.476353
	443.351	0.738234	356.934	2208.47	836.047	52.1475	0.66008	527.736	3169.61	1360.07	0.0961483	0.409757	0.543923	0.396407	0.396754	0.468549
test_2021_07_11_17_38	406.67	0.735609	324.704	1891.5	732.814	49.2361	0.743562	474.246	2990.12	1067.77	0.101498	0.361608	0.579048	0.385491	0.497378	0.408597
test_2021_07_11_17_40	309.615	0.740787	301.28	2000.28	734.796	40.3296	0.65099	434.074	2978.78	1248.39	0.127215	0.41013	0.549289	0.392281	0.440342	0.434429
	449.582	0.71206	323.498	1980.98	796.266	52.038	0.652537	489.273	3286.03	1361.75	0.104327	0.458526	0.540653	0.3996	0.421706	0.433168
	357.22	0.725057	314.481	2018.22	774.172	44.5627	0.644355	473.955	2922.02	1301.38	0.112526	0.4386	0.543355	0.39626	0.426677	0.436537
	426.767	0.727968	319.343	1976.03	764.816	51.1894	0.665192	518.015	3131.41	1308.75	0.105877	0.428145	0.556294	0.392833	0.448068	0.429591
	396.212	0.677485	298.122	2001.28	843.997	55.197	0.650854	545.478	3975.91	1439.81	0.120643	0.513301	0.521655	0.412291	0.428025	0.438893
	402.052	0.719018	328.738	2052.94	808.116	33.1743	0.638063	601.439	3951.91	1522.35	0.0767963	0.461602	0.540732	0.398897	0.395648	0.438157
	320.226	0.714102	344.304	2146.6	847.917	34.8805	0.616625	475.909	3394.92	1492.63	0.107235	0.477364	0.531173	0.400731	0.360602	0.449478
	440.116	0.723586	292.473	1927.51	737.651	47.547	0.587943	607.364	3047.4	1476.2	0.0977856	0.491865	0.539118	0.395736	0.415267	0.445148
	353.017	0.722185	369.905	2262.88	890.293	41.3069	0.620651	492.988	3562.55	1427.63	0.104977	0.460372	0.532282	0.400457	0.415234	0.446547
	453.294	0.750152	325.388	2045.84	748.65	55.3994	0.627288	562.459	3472.74	1388.75	0.114686	0.413193	0.567567	0.387792	0.419506	0.4474
	419.134	0.698172	302.111	2015.01	816.689	80.5058	0.678034	478.479	2962.87	1189.78	0.178784	0.454726	0.53508	0.404487	0.461788	0.427279
	359.571	0.698808	340.122	2167.85	885.839	52.6463	0.651247	448.188	2668.23	1163.41	0.125825	0.47598	0.515634	0.408161	0.454654	0.434299
	372.067	0.703626	307.609	2203.27	861.566	75.8094	0.608718	587.692	3224.76	1426.53	0.184271	0.509057	0.484879	0.411438	0.430053	0.445588
	417.416	0.682715	320.635	2065.45	868.009	51.3864	0.675647	473.987	3577.17	1250.58	0.109678	0.486815	0.514484	0.411079	0.441837	0.427335
	433.392	0.705486	306.756	1929.76	784.226	54.9398	0.62544	416.542	2881.4	1262.28	0.114243	0.484263	0.539409	0.399006	0.407794	0.441892
	498.452	0.733583	315.794	1939.12	749.702	59.5411	0.698256	462.374	3205.19	1206.57	0.105108	0.39691	0.567903	0.389426	0.447041	0.420218
	521.616	0.731399	318.278	2006.27	769.135	60.8883	0.610566	499.167	3184.51	1421.2	0.101441	0.454626	0.554234	0.394454	0.415925	0.443658
	425.066	0.713932	328.672	2110.89	838.17	54.3045	0.634454	472.85	3058.88	1329.58	0.116914	0.467827	0.524801	0.403268	0.410437	0.437094
	490.335	0.708982	336.367	2072.66	839.173	54.1236	0.649108	438.799	2992.53	1215.73	0.100001	0.464526	0.530137	0.403535	0.441116	0.432047
	397.742	0.749131	308.076	1828.9	688.545	45.2734	0.683364	507.509	3126.88	1293.76	0.103318	0.373458	0.599317	0.378896	0.435234	0.430634
	434.388	0.72355	309.546	1991.44	771.194	43.3164	0.64741	540.029	3477.99	1415.21	0.0910298	0.441897	0.54153	0.39757	0.403909	0.437605
	522.546	0.750167	318.255	1897.93	713.28	67.0648	0.653309	416.736	2887.01	1239.52	0.112126	0.390226	0.592344	0.380708	0.426513	0.434262
	485.48	0.751509	334.063	2026.01	752.006	53.7457	0.674425	535.159	3277.48	1353.81	0.0952059	0.379336	0.572804	0.386656	0.426379	0.42844
	501.24	0.71208	334.171	2078.25	833.643	65.0044	0.617648	453.468	2774.76	1280.71	0.114032	0.480112	0.536715	0.402291	0.429491	0.441271
	375.477	0.698372	320.836	2033.38	835.671	46.4948	0.646813	517.503	3542.39	1400.13	0.119449	0.480363	0.526358	0.403361	0.410039	0.435658
	427.989	0.76962	302.455	1928.85	676.062	54.4539	0.698116	460.186	2564.76	1032.74	0.109076	0.340988	0.592121	0.377554	0.506409	0.418294
	492.487	0.721875	307.851	1977.67	769.227	108.849	0.628664	560.495	2761	1345.2	0.180961	0.458741	0.539969	0.398552	0.446467	0.439621
	475.754	0.714794	330.011	2063.69	820.536	88.0473	0.604877	850.899	3170.78	1619.4	0.145326	0.498236	0.542638	0.401119	0.404122	0.448146
	423.926	0.768371	353.944	2096.54	751.698	39.8235	0.670857	559.368	3371.92	1352.36	0.088049	0.359979	0.575178	0.381914	0.425062	0.429105
	313.514	0.724384	320.281	1941.3	762.302	290.942	0.462383	2839.45	3613.88	3079.76	0.493602	0.651938	0.558352	0.394773	0.271341	0.495186
	437.906	0.725735	297.447	1960.81	749.772	79.325	0.650491	415.095	2792.89	1167.3	0.146568	0.432111	0.549963	0.396105	0.448445	0.432978
	397.872	0.74532	343.563	2185.11	807.891	28.6419	0.624658	473.116	3142.96	1329.52	0.0694382	0.429569	0.552701	0.390647	0.394838	0.438125
	416.494	0.766048	328.199	2017.52	721.355	46.1944	0.642213	455.139	2933.63	1277.94	0.0993633	0.375026	0.589526	0.37848	0.422323	0.439103
	513.941	0.695067	305.681	2116.44	853.839	359.399	0.482776	1766.05	2938	2320.83	0.356527	0.67599	0.513717	0.411753	0.343576	0.483681
	486.354	0.716388	320.882	1931.29	774.6	108.082	0.680782	536.996	2467.42	1119.43	0.16614	0.441456	0.556593	0.396129	0.496201	0.41697
	351.145	0.73039	309.548	1975.98	754.751	66.0804	0.662013	431.708	3238.8	1215.63	0.142961	0.421366	0.545466	0.394828	0.428089	0.432511
	343.713	0.696974	312.176	2081.04	851.287	45.3701	0.661851	455.054	2897.18	1189.42	0.121133	0.475579	0.518309	0.40555	0.438414	0.428238
	339.83	0.730387	317.843	2052.3	781.913	40.1042	0.672524	522.954	3175.64	1203.17	0.108926	0.4202	0.544635	0.396594	0.439746	0.429686
	445.195	0.736662	309.485	1920.4	732.592	69.9257	0.676361	443.839	2801.88	1136.89	0.12551	0.399235	0.563059	0.388995	0.462227	0.425212
	339.932	0.719619	316.147	2132.28	823.962	71.564	0.658731	453.063	2810.42	1201.92	0.173612	0.439574	0.520904	0.403066	0.435034	0.4308
test_2021_07_11_17_42	244.119	0.737144	332.487	2094.43	787.201	74.2336	0.703383	472.677	3057.61	1166.43	0.232355	0.380188	0.549548	0.393444	0.451761	0.429374
test_2021_07_11_17_43	333.369	0.755955	341.062	2027.67	746.856	33.0604	0.663881	509.952	3937.46	1365.72	0.0932307	0.383173	0.581778	0.383063	0.404585	0.446701
	381.205	0.717942	343.265	2107.38	830.899	54.2411	0.702276	458.822	3315.37	1227.64	0.117604	0.4106	0.532226	0.399602	0.444613	0.430793
	322.85	0.729518	353.717	2125.95	823.353	44.0329	0.621233	579.909	3707.51	1542.15	0.12589	0.45423	0.544031	0.394714	0.391852	0.447704
	259.535	0.741043	365.507	2223	831.696	32.7231	0.686992	423.67	3026.9	1154.74	0.110912	0.391189	0.540548	0.393704	0.447232	0.430313
	323.4	0.726899	350.183	2089.36	817.934	39.6	0.700521	342.885	2701.63	1000.61	0.109579	0.400568	0.54108	0.394493	0.463402	0.428919
	287.559	0.691891	341.72	2078.45	864.451	34.7966	0.663797	446.742	3063.03	1200.22	0.110388	0.476707	0.522479	0.406896	0.418533	0.442076
	337.949	0.681019	357.512	2188.34	931.225	41.0114	0.678176	428.153	2771.34	1153.85	0.114402	0.481247	0.498757	0.413079	0.450346	0.432436
	398.87	0.782384	336.725	2037.57	705.316	32.716	0.710311	436.462	3164.58	1129.77	0.075649	0.314706	0.60665	0.371246	0.433254	0.425848
	387.236	0.724532	338.724	2104.72	821.314	41.3949	0.682886	380.651	2942.09	1105.33	0.0947764	0.415883	0.542984	0.399614	0.452476	0.432771
	399.753	0.711183	319.056	1927.58	774.641	54.6735	0.690461	413.171	2753.09	1102.08	0.117608	0.425329	0.55158	0.396261	0.453773	0.430484
	460.506	0.722786	343.144	1992.87	797.105	47.8471	0.648173	420.75	2619.79	1151.64	0.0939473	0.439624	0.556927	0.397133	0.441909	0.44429
	432.974	0.718422	358.532	2176.16	865.564	47.2474	0.642889	443.867	2663.85	1191.13	0.101985	0.453214	0.529246	0.402067	0.422692	0.448091
	397.718	0.678116	349.874	2072.43	895.803	55.0132	0.640923	445.153	2753.66	1213.44	0.117804	0.520827	0.516135	0.410173	0.42745	0.444385
	311.983	0.677672	290.609	2115.89	878.84	122.255	0.647402	436.347	2720.47	1209.74	0.277922	0.503992	0.484108	0.415771	0.441414	0.44036
	351.945	0.72772	358.267	2135.68	838.075	54.0159	0.635923	413.455	2940.64	1272.81	0.134414	0.434975	0.547604	0.395702	0.418977	0.44656
	289.218	0.661075	315.64	2216.1	953.167	67.0844	0.741197	371.589	2590.98	900.621	0.178734	0.465093	0.472463	0.42088	0.510125	0.413661
	378.974	0.69839	296.785	2038.05	818.627	115.595	0.631771	394.577	2779.92	1209.35	0.229103	0.486305	0.514276	0.407435	0.442899	0.448234
	421.598	0.714543	355.316	2193.01	873.772	66.5462	0.653471	430.633	2795.88	1185.41	0.132861	0.449679	0.522133	0.403878	0.42949	0.438227
	317.783	0.687724	310.139	2176.48	893.385	40.7702	0.594562	414.462	2861.35	1356.93	0.115966	0.540441	0.485077	0.413094	0.39521	0.457443
	364.134	0.740428	375.597	2194.76	837.067	36.4295	0.723835	475.225	2892.84	1074.27	0.0914479	0.371651	0.564866	0.392629	0.482891	0.41941
	352.515	0.756854	369.487	2283.69	827.713	38.6567	0.689564	427.877	2860.79	1118.96	0.10315	0.360783	0.558822	0.390294	0.449732	0.434858
	448.434	0.688843	312.981	2059.18	850.566	63.0229	0.623035	406.314	2640.91	1207.09	0.125238	0.520153	0.516924	0.41053	0.43526	0.452624
	450.414	0.758616	339.664	2112.8	763.921	42.0744	0.660076	458.318	3118.75	1292.91	0.087458	0.377753	0.561618	0.384473	0.425481	0.442536
	444.923	0.754619	318.614	1894.92	711.564	48.8842	0.641028	495.386	2828.02	1255.93	0.0992297	0.411528	0.603424	0.373633	0.444844	0.443386
	419.811	0.724716	335.353	2067.29	808.873	45.2925	0.659611	592.538	3216.6	1391.46	0.0998178	0.442659	0.547232	0.395939	0.407378	0.438843
	340.084	0.674994	328.605	2126.62	903.369	49.3655	0.596567	334.792	2520.33	1188.27	0.130488	0.563591	0.500318	0.41329	0.410266	0.456
	324.806	0.703953	342.207	2146.59	870.29	43.2708	0.659162	667.626	3250.11	1399.89	0.121525	0.463127	0.514693	0.40789	0.413789	0.448801
	311.901	0.728835	339.378	2163.37	824.517	95.54	0.665844	462.717	2754.21	1197.12	0.245995	0.415281	0.534972	0.398395	0.455959	0.43901
	257.778	0.731759	296.909	2081.24	767.521	80.6966	0.623994	365.128	2537.78	1163.33	0.248763	0.439369	0.536451	0.398842	0.426134	0.450476
	468.879	0.710616	319.842	1911.65	779.344	44.3851	0.65917	363.563	2644.07	1104.16	0.0850317	0.451995	0.552116	0.396735	0.425407	0.446705
	485.834	0.67541	376.079	2187.59	957.185	75.5586	0.643145	443.218	2824.37	1238.13	0.132146	0.518088	0.509431	0.413599	0.426517	0.441029
	383.929	0.746306	343.239	2188.44	806.542	47.0489	0.676523	456.158	3161.13	1274.01	0.109017	0.380086	0.547156	0.393676	0.427754	0.436618
	326.383	0.761623	342.161	2105.8	754.887	35.1067	0.679515	454.623	2928.18	1145.27	0.0964224	0.368371	0.572906	0.383229	0.448814	0.430743
	318.977	0.751786	343.014	2121.65	774.394	51.09	0.683007	383.252	2712.92	1075.58	0.148194	0.370545	0.558317	0.388213	0.458269	0.433404
	336.263	0.748538	350.312	2210.9	810.434	64.3072	0.687567	410.653	2794.94	1104.02	0.166063	0.373555	0.544931	0.393137	0.464607	0.432057
	308.527	0.754891	341.841	2106.62	766.834	29.6182	0.700134	429.571	2937.67	1090.03	0.0880934	0.360207	0.567626	0.385402	0.450507	0.431658
	367.721	0.707825	315.061	2005.73	800.196	58.2132	0.666566	373.567	2713.68	1109.34	0.131876	0.452497	0.541204	0.39888	0.4333	0.443023
	221.384	0.707408	341.569	2299.14	900.751	52.1689	0.678616	334.915	2683.24	1054.78	0.187324	0.443606	0.507983	0.407806	0.439713	0.438194
	404.037	0.719127	363.651	2241.79	880.741	66.9112	0.631116	385.718	2697.14	1192.34	0.138436	0.456236	0.523982	0.402529	0.436331	0.447763
	456.716	0.757377	328.843	2042.17	740.515	59.1124	0.64672	346.308	2503.09	1062.12	0.112735	0.387271	0.566304	0.384399	0.457696	0.443631
	267.774	0.710365	304.256	2033.94	796.67	51.0729	0.673006	359.15	2938.1	1113.52	0.216722	0.440407	0.511013	0.403394	0.416439	0.445713
	275.722	0.750097	305.812	1969.26	713.543	60.3579	0.697599	374.965	2761.89	1064.81	0.21582	0.36327	0.574313	0.384352	0.452103	0.431232
	466.323	0.753439	336.479	1949.34	731.737	66.5571	0.681435	310.74	2388.13	947.868	0.125868	0.369861	0.577343	0.380658	0.475595	0.435801
	325.353	0.728335	333.807	2081.64	802.063	43.4221	0.647724	300.643	2475.35	1039.24	0.135182	0.434858	0.542392	0.396778	0.417124	0.455325
	360.321	0.734654	324.848	2028.03	769.026	39.0107	0.705708	297.562	2732.74	964.5	0.095672	0.384611	0.549724	0.392314	0.445285	0.427734
	288.577	0.658569	347.365	2251.43	1005.38	65.9872	0.68518	318.844	2635.02	1015.77	0.176645	0.506685	0.482627	0.417941	0.42858	0.442782
	340.697	0.732397	338.776	2193.46	824.739	48.5665	0.686577	365.489	2924.13	1102.49	0.125669	0.397184	0.540769	0.396327	0.433248	0.437272
	387.284	0.726507	344.079	2003.98	792.377	45.9613	0.63252	454.238	2860.08	1257.63	0.106782	0.451557	0.550646	0.394457	0.405764	0.454713
test_2021_07_16_17_21	440.989	0.66268	349.383	2425.94	1047.21	77.4828	0.583938	493.125	2999.75	1483.73	0.152212	0.599118	0.46146	0.423455	0.411186	0.447561
test_2021_07_16_17_23	411.85	0.684603	339.567	2336.94	967.675	58.35	0.613138	311.923	2686.31	1218.95	0.135008	0.535468	0.494438	0.417431	0.39876	0.44204
	405.756	0.675169	381.213	2547.38	1081.37	66.3171	0.628831	524.042	3846.81	1500.76	0.144426	0.533645	0.463209	0.418959	0.404667	0.436302
	477.251	0.66866	385.303	2476.02	1067.85	65.8075	0.613931	482.263	3521.64	1405.09	0.122543	0.555327	0.466817	0.419959	0.429527	0.441734
	411.643	0.683748	350.996	2288.09	955.289	58.2857	0.60325	477.418	3032.02	1343.47	0.135869	0.5442	0.490949	0.414347	0.441763	0.445613
	469.789	0.710125	374.014	2532.05	989.207	59.6842	0.588224	459.943	2774.81	1376.92	0.111463	0.510495	0.487057	0.410158	0.437156	0.448538
	361.213	0.692006	361.606	2433.52	995.388	69.7541	0.625237	340.574	2288.87	1035.86	0.161299	0.495531	0.486599	0.41458	0.480335	0.433245
	442.729	0.710456	342.423	2232.08	884.427	74.1755	0.633297	400.835	2670.1	1186.61	0.142616	0.464243	0.521337	0.40569	0.453001	0.434585
	480.939	0.75078	324.102	2148.28	774.943	69.9592	0.632355	362.974	2527.79	1140.96	0.125856	0.401191	0.547823	0.392062	0.460467	0.435955
	499.454	0.695701	364.223	2328.01	953.062	66.1856	0.609474	388.39	2595.87	1206.22	0.117469	0.517876	0.50466	0.412118	0.447664	0.439795
	463.185	0.6725	366.008	2411.56	1031.16	69.371	0.61341	433.24	2717.42	1278.99	0.131007	0.550123	0.475853	0.420148	0.446103	0.443269
	533.58	0.713787	351.265	2294.69	901.447	66.7654	0.618647	468.312	2793.49	1291.78	0.111343	0.477543	0.50798	0.406754	0.439546	0.442914
	456.907	0.723539	315.386	2143.6	819.466	68.4186	0.620792	485.255	3599.08	1373.43	0.138725	0.457684	0.524927	0.400939	0.45664	0.438791
	523.63	0.75052	338.899	2236.63	810.701	70.1389	0.626221	459.135	3586.46	1366.21	0.120754	0.405806	0.541497	0.393409	0.435033	0.438316
	418.66	0.701682	361.647	2319.58	942.032	76.1602	0.644261	389.441	2430.64	1094.93	0.160296	0.47501	0.509164	0.410042	0.494264	0.428873
	517.486	0.741757	325.709	2169.4	798.994	69.2973	0.591425	550.546	2755.99	1416.31	0.117214	0.441724	0.538735	0.393847	0.469891	0.445939
	475.942	0.741604	365.56	2389.53	881.211	62.3526	0.678146	406.48	2889.31	1164.61	0.117735	0.387409	0.528247	0.39819	0.448916	0.427584
	498.146	0.69874	375.395	2470.87	1001.37	76.3646	0.621453	449.406	2783.21	1275.58	0.127407	0.497721	0.48129	0.413846	0.438835	0.44037
	598.931	0.733568	339.679	2210.95	837.197	74.341	0.648467	447.099	2797.21	1242.64	0.110583	0.422741	0.531808	0.397495	0.459135	0.433277
	468.804	0.703225	304.13	2159.03	851.849	65.3043	0.624354	481.774	2909.57	1338.4	0.124048	0.496027	0.505397	0.408452	0.460119	0.434198
	232.383	0.724714	310.374	2307.88	851.473	64.5667	0.750515	327.09	2687.53	900.27	0.268836	0.368633	0.491188	0.404656	0.504621	0.408627
	452.793	0.729698	304.505	2114.58	789.531	51.3103	0.663524	394.765	2609.59	1126.37	0.107111	0.410907	0.532737	0.398719	0.471345	0.431726
	532.813	0.731517	362.573	2330.99	886.675	86.3316	0.654437	439.705	2698.45	1176.54	0.138017	0.419955	0.522328	0.401882	0.466788	0.429361
	452.475	0.717209	325.764	2267.27	871.699	70.9016	0.628983	535.616	3629.69	1317.56	0.13592	0.472221	0.511434	0.405956	0.464914	0.440819
	608.15	0.705901	346.107	2170.55	878.114	74.825	0.625125	392.116	2914.92	1276.19	0.108749	0.479456	0.525557	0.406943	0.446286	0.444301
	544.75	0.724468	337.756	2181.04	840.016	75.8929	0.615417	422.042	2893.17	1352.05	0.129479	0.4549	0.542577	0.401227	0.41683	0.440672
	549.472	0.693608	374.663	2326.69	967.754	74.5139	0.637202	407.393	2881.05	1275.23	0.119097	0.488576	0.498721	0.412059	0.431394	0.435634
	390.764	0.718716	324.036	2252.07	863.911	106.81	0.597008	327.592	2380.1	1140.05	0.245975	0.478824	0.511357	0.406946	0.452864	0.445609
	388.489	0.663113	343.902	2430.82	1039.03	64.7333	0.648549	394.401	3090.04	1317.75	0.148768	0.528378	0.467561	0.423408	0.401037	0.436526
	464.105	0.722592	378.284	2351.12	915.599	66.4211	0.649591	280.485	2589.11	1070.38	0.138237	0.430553	0.512796	0.40347	0.442178	0.441623
	357.265	0.698487	310.572	2076.16	838.257	62.9796	0.669179	386.199	2708.77	1118.03	0.15596	0.455314	0.514648	0.407406	0.446315	0.433265
	459.007	0.718165	344.286	2376.7	913.284	73.2086	0.679367	374.449	2621.54	1062.91	0.131553	0.422705	0.513812	0.407615	0.471289	0.42525
	522.597	0.712505	359.076	2338.04	923.532	79.5746	0.609409	363.712	2521.66	1178.54	0.124812	0.489172	0.502717	0.406771	0.446941	0.443058
	425.399	0.637005	369.126	2495.56	1140.31	114.655	0.622926	432.57	3126.61	1311.77	0.206276	0.597661	0.45632	0.427556	0.439028	0.440025
	419.868	0.629707	391.075	2523.78	1178.18	77.6838	0.642652	412.656	2709.77	1178.87	0.156771	0.588916	0.446044	0.430779	0.448544	0.432315
	551.266	0.707116	345.731	2260.01	905.083	97.2762	0.627763	405.972	2548.59	1180.34	0.146497	0.475789	0.515182	0.407901	0.460527	0.438499
	584.327	0.738225	326.754	2232.81	824.131	61.2545	0.627733	440.238	2704.15	1241.64	0.0934106	0.425212	0.5278	0.39808	0.455633	0.442759
	434.336	0.72163	335.387	2192.27	848.881	67.2607	0.65709	386.564	2652	1139.36	0.135492	0.432568	0.519806	0.403163	0.464674	0.432577
	428.569	0.721411	344.607	2362.41	900.651	92.6192	0.643524	401.186	2609.63	1153.58	0.191374	0.440097	0.498522	0.406204	0.46627	0.433992
	405.958	0.719065	318.79	2215.02	844.957	71.2708	0.651219	384.993	2541.79	1099.32	0.15212	0.438125	0.514859	0.40436	0.499139	0.431625
	465.573	0.74191	346.232	2279.74	841.861	69.246	0.660029	423.079	2618.69	1109.75	0.128705	0.402806	0.522868	0.397477	0.484955	0.429331
	520.865	0.719615	370.524	2409.69	936.879	78.1622	0.627782	508.673	2958.22	1349.77	0.133449	0.463564	0.50029	0.406359	0.452847	0.438016
test_2021_07_16_17_28	360.11	0.751707	344.727	2337.62	835.397	56.0055	0.657698	373.5	2445.44	1043.54	0.139959	0.386663	0.530159	0.395343	0.506178	0.425744
test_2021_07_16_17_29	474.313	0.746318	367.059	2436.8	888.965	41.1616	0.691435	563.412	3725.2	1403.07	0.0857274	0.37735	0.52161	0.397887	0.434106	0.426309
test_2021_07_16_17_28	474.614	0.746864	367.128	2435.52	887.618	41.1485	0.69041	555.596	3695.27	1393.42	0.085531	0.377002	0.522147	0.397685	0.435283	0.426894
test_2021_07_16_17_29	525.861	0.747648	364.38	2274.1	844.258	38.9306	0.619227	387.226	2548.94	1166.09	0.0693235	0.418453	0.536313	0.395152	0.470013	0.442488
	476	0.753654	353.35	2072.14	770.506	43.1	0.669751	416.119	3036.49	1243.46	0.0863493	0.370751	0.56875	0.385083	0.447457	0.432467
	419.288	0.770211	359.313	2306.48	798.081	56.6477	0.642238	482.533	3070.01	1346.99	0.117337	0.371061	0.565653	0.384953	0.424824	0.437332
	417.749	0.752021	354.718	2290.23	830.305	61.5	0.647018	435.449	2708.58	1167.23	0.127282	0.394564	0.537855	0.393431	0.472836	0.431574
	472.353	0.753243	357.707	2128.99	789.147	70.4841	0.611684	452.294	3042.47	1368.26	0.122969	0.415153	0.573758	0.387406	0.420485	0.442773
	360.221	0.73644	396.346	2434.36	929.487	44.8961	0.655157	530.831	3332.24	1381.46	0.114983	0.421509	0.525648	0.400344	0.447353	0.43209
	450.77	0.689664	347.802	2365.7	970.156	38.3363	0.639697	438.685	3019.95	1278.36	0.0811483	0.495805	0.488672	0.41534	0.433944	0.440008
	564	0.746606	355.188	2252.19	833.993	49.0866	0.622502	425.998	2965.75	1257.07	0.0793532	0.420332	0.543414	0.395218	0.456376	0.442534
	454.006	0.746506	377.134	2484.47	903.607	40.3352	0.614008	385.768	2653.4	1212.43	0.0840572	0.426169	0.514399	0.397943	0.440168	0.443089
	445.177	0.740111	355.154	2242.03	840.771	66.7349	0.641894	397.989	2501.87	1105.85	0.119499	0.421139	0.541705	0.396732	0.462805	0.433153
	483.474	0.695899	373.385	2369.52	978.014	67.3265	0.634261	380.035	2783.8	1219.93	0.107159	0.491682	0.505623	0.413514	0.432546	0.443665
	435.207	0.707552	361.36	2336.37	936.794	52.3476	0.661051	437.28	3271.43	1282.86	0.109019	0.455108	0.512625	0.407814	0.416444	0.431431
	477.45	0.72554	370.929	2360.51	911.883	51.2426	0.643407	423.758	2885.53	1261.68	0.0953887	0.438363	0.519835	0.403737	0.42688	0.438508
	519.184	0.757179	367.732	2320.01	835.773	49.5189	0.63178	402.122	2729.99	1208.88	0.087346	0.397992	0.546676	0.390983	0.436626	0.442208
	467.951	0.713597	366.939	2401.87	948.818	54.6521	0.656948	468.632	3127.06	1328.16	0.105639	0.446954	0.507563	0.407255	0.423733	0.433356
	375.147	0.707687	404.163	2593.78	1037.67	42.2147	0.655247	408.69	2961.33	1197.57	0.104568	0.454126	0.486207	0.410299	0.448549	0.43557
	468.265	0.753498	360.91	2330.53	843.55	50.1691	0.620891	445.716	2767.57	1223.36	0.0976498	0.408924	0.535632	0.393134	0.46736	0.438489
	366.405	0.742052	381.401	2415.26	898.373	35.2381	0.653772	466.489	3167.41	1293.64	0.0927991	0.412164	0.535869	0.397142	0.433722	0.436791
	456.264	0.740202	364.822	2271.55	856.114	61.6866	0.63982	348.427	2500.81	1101.62	0.119358	0.413993	0.541153	0.396256	0.452472	0.445344
	376.325	0.7476	398.689	2461.29	914.079	42.6154	0.685536	407.172	2838.68	1111.29	0.105253	0.381149	0.533669	0.396148	0.469364	0.423925
	450.752	0.75778	365.115	2264.02	820.663	45.5826	0.670619	379.545	2710.14	1097.52	0.0910073	0.375066	0.555469	0.389134	0.463202	0.430536
	474.865	0.678194	373.832	2403.26	1023.59	58.1575	0.63169	329.241	2604.42	1134.59	0.108071	0.522313	0.480047	0.417187	0.442321	0.443521
	407.25	0.739437	351.539	2343.04	864.797	59.1977	0.70127	351.113	2737.8	1030.91	0.12118	0.380916	0.532677	0.398529	0.463661	0.423334
	357.667	0.754274	374.677	2492.39	888.864	36.3529	0.770346	331.847	3087.63	936.705	0.0985158	0.336685	0.519015	0.394796	0.460688	0.39396
test_2021_07_16_17_31	412.18	0.758329	365.375	2286.83	825.105	37.3158	0.714982	372.999	3019.56	1017.07	0.0872147	0.347945	0.548687	0.388781	0.478502	0.417558
test_2021_07_16_17_33	480.6	0.745174	375.375	2352.63	873.783	55.9905	0.650851	377.406	2662.08	1125.11	0.102666	0.402809	0.538282	0.39672	0.459884	0.432632
	377.943	0.707417	370.296	2419.37	967.504	39.879	0.682344	345.474	2660.98	1039.65	0.101826	0.436489	0.504752	0.408039	0.448402	0.433982
	441	0.720713	422.299	2667.73	1043.47	55.6604	0.644213	459.715	2869.64	1233.33	0.115028	0.448797	0.490502	0.407816	0.465937	0.431206
test_2021_07_16_17_31	387.478	0.719789	361.201	2384.73	924.693	40.3261	0.657667	546.193	2920.27	1330.15	0.10248	0.43369	0.515266	0.406083	0.445194	0.433722
test_2021_07_16_17_33	428.824	0.741837	361.784	2318.84	861.022	48.2451	0.639304	397.44	2857.3	1215.86	0.104957	0.417848	0.532526	0.396547	0.441283	0.434739
	444.764	0.719918	422.346	2659.35	1042.18	55.5326	0.645017	466.24	2908.33	1240.59	0.113997	0.449449	0.491083	0.407789	0.465459	0.43068
	398.381	0.738385	402.19	2554.68	957.697	54.0857	0.672357	595.723	4914.84	1503.73	0.121991	0.402388	0.517075	0.400214	0.436639	0.430069
	464.15	0.767293	372.961	2341.31	826.487	54.4222	0.647978	418.898	2480.01	1092.06	0.104051	0.374821	0.551818	0.388227	0.495416	0.426984
	480.395	0.691587	388.159	2494.79	1037.31	61.8968	0.606205	451.613	2650.21	1270.36	0.113276	0.524963	0.483537	0.414178	0.433714	0.443928
	422.201	0.741611	393.179	2521.89	935.727	49.7852	0.649875	537.132	3636.86	1381.98	0.10778	0.414654	0.512959	0.400116	0.43876	0.432103
	408.37	0.726134	379.673	2473.91	948.932	48.8403	0.654558	522.856	3139.12	1356.39	0.10725	0.433093	0.508942	0.40612	0.446997	0.434986
	422.639	0.726002	334.662	2218.31	847.851	66.504	0.640068	485.932	3344.92	1359.51	0.1353	0.439105	0.529807	0.400832	0.437576	0.436341
	439.97	0.746984	383.512	2412.63	893.266	51.189	0.666951	477.64	3075.43	1248.66	0.105287	0.392551	0.529969	0.396151	0.454402	0.429328
	525.373	0.738193	370.276	2340.35	882.662	47.9314	0.628078	461.804	2939	1331.23	0.0834362	0.431847	0.541681	0.396314	0.431574	0.440823
	403.707	0.673213	388.803	2412.39	1039.87	56.7561	0.656376	431.777	2835.31	1212.09	0.118733	0.509055	0.488319	0.417712	0.45615	0.431723
	491.098	0.734669	331.445	2102.76	796.678	68.9146	0.600529	418.589	2398.76	1157.06	0.122614	0.46024	0.549297	0.394483	0.481684	0.439204
	395.099	0.700487	321.224	2168.93	870.667	51.2624	0.663877	457.925	3043.19	1283.77	0.117543	0.460321	0.515717	0.408213	0.429607	0.431997
	517.125	0.694705	382.379	2317.92	968.439	95.6626	0.639844	437.601	2750.43	1220.19	0.14361	0.487186	0.502615	0.411731	0.453769	0.4344
	563.651	0.724784	366.35	2298.7	897.76	87.746	0.603243	447.486	3021.43	1322.98	0.128729	0.470011	0.525414	0.401914	0.440702	0.443508
	485.992	0.706707	369.359	2262.31	919.14	52.4331	0.648931	439.974	3520.04	1371.08	0.0965178	0.462043	0.517398	0.40723	0.423562	0.433534
	419.818	0.762592	415.219	2520.07	909.24	49.927	0.594543	540.697	3232.87	1436.52	0.10992	0.419066	0.543954	0.391767	0.441666	0.444678
	473.859	0.743007	403.853	2493.4	937.791	49.2394	0.660047	482.782	3043.01	1302.1	0.0938054	0.39604	0.525762	0.398659	0.439369	0.432526
	425.812	0.735065	363.466	2412.69	902.779	55.0891	0.659688	393.937	3140.01	1254.74	0.119283	0.411498	0.511544	0.40157	0.430421	0.431842
	322.014	0.686699	356.713	2424.17	994.031	57.4324	0.677317	372.633	2888.08	1143.53	0.200597	0.479871	0.474853	0.417205	0.430528	0.434081
	474.78	0.723552	380.241	2240.01	893.408	87.22	0.690537	457.482	2975.42	1200.61	0.137464	0.405458	0.53303	0.400896	0.45461	0.42476
	334.991	0.697712	348.254	2502.14	996.131	70.3547	0.61028	435.113	2815.37	1301.41	0.205397	0.515888	0.470813	0.412734	0.449991	0.44266
	560.562	0.710626	395.224	2337.26	957.293	73.2955	0.668494	397.68	2756.37	1147.71	0.10939	0.442229	0.522583	0.406359	0.457573	0.429841
	429.959	0.743685	371.408	2299.74	865.43	54.6296	0.680489	406.715	3245.1	1139.97	0.112624	0.39398	0.5419	0.394657	0.465848	0.424497
	426.362	0.718947	385.333	2508.83	981.569	52.2319	0.668581	426.787	2989.9	1157.06	0.115734	0.433946	0.505088	0.407022	0.468097	0.427782
	462.929	0.721542	362.058	2320.96	902.934	55.7087	0.673661	470.793	3066.9	1221.71	0.106648	0.422857	0.513258	0.404314	0.453331	0.424252
	494.702	0.679869	361.448	2247.52	961.705	61.8177	0.638469	451.249	2839.96	1261.29	0.113313	0.513557	0.502694	0.413625	0.443368	0.439406
	515.62	0.746031	361.584	2163.48	815.865	64.0759	0.622504	518.987	2776.24	1318.52	0.109238	0.420913	0.562722	0.391901	0.44702	0.439787
	422.863	0.703744	351.738	2367.65	947.676	62.1988	0.676416	440.618	3080.14	1221.47	0.128421	0.448662	0.504456	0.409467	0.447479	0.425261
	438.744	0.718595	389.03	2414.35	956.762	52.3778	0.663133	349.293	2698.67	1102.74	0.106393	0.433044	0.513997	0.405392	0.453205	0.433725
	568.311	0.678119	374.078	2318.35	996.408	63.4815	0.644115	485.61	2970.51	1264.88	0.100209	0.513323	0.491639	0.416737	0.452296	0.437069
	506.54	0.739328	351.516	2184.23	826.851	97.2926	0.621547	431.055	2772.04	1277.03	0.143394	0.430044	0.548206	0.394336	0.44143	0.437673
	339.969	0.73889	381.332	2688.59	977.944	44.1875	0.629646	424.261	2789.45	1259.11	0.114961	0.425152	0.506093	0.401558	0.443785	0.437412
	492.956	0.695685	393.797	2480.17	1021.37	41.1765	0.660774	438.317	4390.29	1252.15	0.0824431	0.484075	0.486245	0.414408	0.45219	0.432423
	465.738	0.721112	389.608	2506.19	975.547	44.2923	0.695463	449.278	3081.05	1216.38	0.0877865	0.406219	0.489481	0.406321	0.432457	0.425878
	507.076	0.728233	355.396	2281.93	879.928	58.9422	0.634295	429.093	2867.97	1277.99	0.105068	0.439672	0.529275	0.40067	0.444153	0.437849
	566.98	0.702994	371.828	2237.43	920.034	56.596	0.573299	531.97	2746.48	1426.12	0.0895857	0.540753	0.518171	0.406236	0.44214	0.45209
	539.592	0.696628	366.156	2260.19	935.635	55.8469	0.671896	433.794	2877	1180.65	0.0930399	0.460995	0.509846	0.40995	0.465676	0.42997
	446.521	0.708061	368.12	2330.64	938.17	45.1549	0.660348	327.81	2674.51	1088.8	0.094093	0.451252	0.502986	0.406571	0.445184	0.432168
	433.16	0.706858	372.813	2469.47	983.32	57.305	0.607827	426.479	2727.97	1298.22	0.119557	0.499008	0.500455	0.410877	0.428146	0.445292
	359.603	0.727328	404.031	2523.67	976.16	77.5166	0.601432	466.221	2983.75	1371.22	0.165489	0.466617	0.514938	0.404498	0.432445	0.441785
	323.482	0.690141	353.551	2444.55	994.503	63	0.643031	528.504	2939.52	1321.29	0.188943	0.502787	0.482247	0.414541	0.451168	0.435806
	395.093	0.694496	371.293	2393.91	978.087	58.1574	0.66397	422.354	3020.25	1256.12	0.144342	0.467106	0.500109	0.411344	0.429409	0.432156
	345.027	0.723333	403.945	2523.88	986.028	52	0.691411	293.779	2658.26	999.572	0.138834	0.402557	0.506432	0.405536	0.464845	0.428667
	470.596	0.742879	376.253	2591.11	941.001	48.0787	0.619458	331.709	2611.72	1178.48	0.0918979	0.423656	0.512086	0.401019	0.448158	0.445642
	408.833	0.697107	377.527	2289.92	953.515	67.1894	0.690375	428.076	2668.92	1091.2	0.142657	0.448997	0.517631	0.409156	0.481141	0.420915
	475.386	0.726773	375.259	2377.16	918.711	90.6656	0.662553	445.051	2908.35	1206.78	0.146113	0.422154	0.52236	0.401554	0.467136	0.428201
	410.959	0.703415	384.287	2396.68	975.887	45.8934	0.716907	431.214	3035.81	1121.67	0.0994481	0.418443	0.50696	0.409286	0.456421	0.417961
	329.14	0.695367	365.643	2319.04	951.747	79.2176	0.619412	398.508	2625.05	1210.38	0.214093	0.50421	0.505936	0.411364	0.450224	0.441381
	448.801	0.721449	356.295	2428.85	938.439	54.045	0.64996	375.196	2657.53	1143.66	0.116989	0.444704	0.504633	0.403465	0.449936	0.434794
	395.482	0.707021	370.782	2438.53	969.71	54.1457	0.62803	430.126	3206.02	1281.1	0.129897	0.488147	0.501393	0.410171	0.429357	0.439898
	364.071	0.717584	374.381	2381.98	936.733	64.2929	0.615871	342.809	2339.57	1084.77	0.150993	0.473543	0.521361	0.405571	0.480532	0.439817
	509.42	0.726142	383.085	2477.09	957.813	92.5372	0.625239	449.31	2803.28	1282.52	0.141307	0.448469	0.51086	0.402915	0.446342	0.440227
	514.21	0.688964	387.517	2556.37	1058.36	47.1774	0.686643	465.352	2980.7	1229.11	0.084261	0.458986	0.468642	0.4161	0.451793	0.425151
	472.929	0.658077	412.713	2645.21	1172.51	48.0306	0.671056	443.965	2968.86	1234.14	0.0924297	0.521048	0.448918	0.423148	0.427867	0.43113
	491.519	0.711918	377.547	2389.99	957.033	53.6047	0.624303	370.909	2512.05	1143.95	0.100725	0.481206	0.506254	0.406527	0.446039	0.441342
	422.133	0.748802	380.074	2490.59	905.543	62.0354	0.653683	372.187	2490.09	1067.47	0.129765	0.393237	0.529525	0.396961	0.45898	0.434708
	352.705	0.734086	368.672	2415.57	910.591	55.8939	0.669017	418.485	2906.43	1209.53	0.139789	0.404703	0.529783	0.400522	0.443406	0.430738
	490.156	0.755607	404.843	2479.74	907.695	54.0889	0.657727	436.411	2860.68	1230.49	0.0988884	0.382234	0.533641	0.394714	0.438497	0.434484
	473.098	0.727037	357.001	2117.38	833.472	51.7647	0.625195	402.422	2519.22	1126.04	0.102749	0.45409	0.54465	0.397278	0.452677	0.442076
	469.04	0.745799	355.86	2285.29	841.443	73.7539	0.636911	367.767	2734.32	1114.87	0.143813	0.408442	0.533342	0.395832	0.465164	0.436341
	349.415	0.732774	362.665	2412.3	903.791	52.3407	0.669736	291.343	2446.89	975.229	0.161492	0.403486	0.517236	0.402576	0.460785	0.42918
	388.19	0.735556	398.462	2482.07	942.286	44.27	0.702877	368.129	3024.44	1105.57	0.111606	0.382367	0.520473	0.401078	0.456583	0.422378
	435.993	0.729353	379.325	2436.38	931.975	53.4191	0.667812	390.15	2629.77	1096.09	0.114527	0.41399	0.51934	0.403452	0.465089	0.429216
	480.264	0.750341	395.739	2443.14	900.868	65.5402	0.647187	295.717	2525.37	1046.1	0.115243	0.396479	0.534483	0.394506	0.457463	0.436501
	419.453	0.721519	356.416	2107.42	838.31	52.6533	0.638592	326.856	2448.22	1051.7	0.118985	0.44847	0.546543	0.398249	0.446159	0.436056
test_2021_07_16_17_35	428.286	0.75248	336.315	2225.71	799.14	66.3175	0.671815	518.293	3327.56	1279.58	0.134347	0.380554	0.546082	0.391902	0.464118	0.425005
test_2021_07_16_17_36	375.299	0.687216	332.346	2266.85	930.06	60.9442	0.666425	349.57	2613.69	1064.24	0.15535	0.477297	0.507011	0.412788	0.462122	0.430088
	399.811	0.69862	326.594	2190.53	888.682	52.9778	0.660135	403.816	2888.47	1213.48	0.133874	0.463986	0.512966	0.407393	0.438617	0.433628
	404.62	0.688859	321.311	2258.16	917.194	47.6446	0.673223	420.706	3064.08	1219.96	0.111272	0.473504	0.501044	0.414375	0.430337	0.434848
	471.613	0.738159	351.803	2310.83	859.004	57.9632	0.625651	462.979	2959.67	1286.81	0.116289	0.436646	0.518748	0.398245	0.4551	0.438497
test_2021_07_16_17_35	425.491	0.718638	352.729	2304.31	896.74	42.6293	0.673278	405.617	2946.59	1184.5	0.0924839	0.427395	0.512147	0.40541	0.432581	0.431772
test_2021_07_16_17_36	417.762	0.743965	333.468	2214.28	809.612	47.505	0.649367	372.206	2812.28	1187.88	0.102894	0.40682	0.540481	0.394317	0.443498	0.438219
	329.771	0.734372	301.514	2205.73	801.208	115.759	0.60379	520.929	2815.51	1373.75	0.286117	0.453332	0.520116	0.400725	0.438746	0.444463
	497.207	0.72858	330.907	2272.31	856.162	50.9634	0.615685	437.428	2693.56	1256.27	0.0912547	0.455062	0.520316	0.403434	0.42776	0.444036
	363.087	0.700609	297.032	2359.44	910.091	120.289	0.662	372.186	2644.46	1109.23	0.246983	0.458785	0.481267	0.415747	0.45956	0.429775
	469	0.730784	362.767	2380.41	902.388	88.9357	0.614235	437.888	2843.62	1307.28	0.149068	0.451067	0.50936	0.401952	0.441564	0.442604
	387.437	0.719581	351.006	2376.18	910.37	47.5714	0.660115	348.157	2804.78	1138.84	0.113927	0.436395	0.507262	0.405152	0.452457	0.433751
	350.937	0.698921	320.524	2211.35	889.144	56.606	0.650747	332.688	2604.12	1082.89	0.144268	0.47601	0.509942	0.408305	0.448838	0.437593
	543.943	0.719715	370.138	2298.37	906.89	58.7547	0.688285	466.9	3215.39	1259.21	0.0952996	0.414982	0.526292	0.40458	0.44414	0.424867
	365.555	0.767051	319.256	2151.61	742.314	51.4688	0.667156	428.346	2858.17	1101.31	0.12641	0.362903	0.554114	0.386402	0.472687	0.430896
	447.767	0.761231	293.954	2020.13	702.269	71.5061	0.668459	364.531	2645.57	1066.21	0.135514	0.366771	0.558989	0.384557	0.462956	0.427458
	433.279	0.711787	318.685	2272.96	879.933	62.6034	0.627702	389.894	2662.89	1207.48	0.126797	0.469309	0.508486	0.408111	0.439843	0.444721
	488.871	0.754994	312.213	2122.46	750.811	65.0188	0.65122	366.897	2397.32	1036.3	0.117795	0.387049	0.552551	0.389747	0.48196	0.430178
	416.183	0.737484	329.956	2251.38	827.764	56.6391	0.640359	404.206	2829.84	1174.17	0.122433	0.420664	0.528835	0.397594	0.436661	0.434513
	386.98	0.722039	337.259	2284.21	873.442	60.1317	0.660894	372.462	2711.31	1126.68	0.134061	0.431746	0.515941	0.405637	0.448654	0.431973
	416.835	0.720001	333.662	2321.54	891.71	86.4411	0.614631	444.918	2709.2	1275.2	0.171616	0.465093	0.514804	0.404324	0.457181	0.442855
	358	0.733905	345.482	2252.84	845.929	57.4065	0.638135	524.165	3644.27	1403.44	0.146091	0.433052	0.533783	0.397806	0.43542	0.438819
	483.589	0.702928	339.44	2287.98	919.534	57.1667	0.618846	422.862	2626.16	1218.75	0.10837	0.497219	0.508038	0.408389	0.4444	0.447243
	488.898	0.684727	331.454	2350.27	963.822	65.3234	0.691845	427.396	2934.72	1129.12	0.117152	0.470499	0.482424	0.418467	0.45862	0.424004
	469.87	0.73883	332.486	2130.07	800.186	53.5935	0.661893	343.456	2700.15	1103.61	0.100188	0.407202	0.546481	0.396023	0.443771	0.433952
	488.72	0.75206	306.237	2069.3	738.467	60.8075	0.639222	375.864	2419.02	1081.86	0.111438	0.397856	0.552485	0.389306	0.470716	0.434418
	409.31	0.73118	315.264	2204.18	819.142	45.8793	0.65047	381.41	2650.03	1128.79	0.10517	0.42297	0.514561	0.401159	0.458595	0.435718
	481.432	0.724735	341.837	2209.51	850.993	56.8409	0.653081	370.058	2671.84	1137.03	0.104144	0.433136	0.530128	0.401015	0.457938	0.433218
	419.307	0.751509	343.692	2293.63	824.163	52.1024	0.642935	342.22	2539.34	1066.73	0.114793	0.400143	0.535447	0.393968	0.461459	0.437218
	451.628	0.710823	338.651	2296.59	903.865	59.043	0.646129	312.152	2423.84	1025.55	0.122202	0.458385	0.517215	0.406891	0.455285	0.436427
	415.351	0.704169	326.289	2185.23	871.047	56.2365	0.641306	306.529	2423.51	1029.33	0.122236	0.469139	0.517948	0.407014	0.452249	0.440198
	344.907	0.682878	368.259	2438.31	1016.87	37.3721	0.681747	229.3	2362.63	887.301	0.0989576	0.471021	0.497366	0.417339	0.473751	0.436256
	336.356	0.721974	349.265	2241.75	871.102	48.322	0.661242	370.444	2613.34	1072.28	0.132687	0.42764	0.528059	0.402753	0.46594	0.431299
	448.878	0.710853	344.427	2362.46	923.694	66.7482	0.623996	403.132	2525.51	1105.75	0.125198	0.480031	0.50068	0.409095	0.472385	0.43497
	486.829	0.692728	350.552	2263.51	934.501	63.2195	0.642857	312.857	2360.34	1024.57	0.113231	0.488059	0.51137	0.411279	0.466442	0.434683
	380.198	0.711571	351.285	2402.72	938.848	62.2708	0.672162	356.999	2573.49	1044.11	0.14285	0.438181	0.502042	0.408828	0.475846	0.425131
	447.852	0.718405	346.288	2441.57	934.142	50.4074	0.651322	335.071	2625.17	1076.15	0.104549	0.44225	0.498106	0.406865	0.445629	0.432691
	443.163	0.708728	348.177	2339.92	926.436	87.7211	0.649493	332.55	2337.04	1011.3	0.146674	0.459096	0.506905	0.408689	0.478032	0.43633
	379.207	0.761656	322.427	2093.01	740.983	55.7065	0.65857	307.98	2301.74	956	0.127397	0.367409	0.563632	0.385512	0.471902	0.432852
	390.367	0.691544	369.707	2506.55	1024.72	44.1562	0.646875	299.169	2551.95	1036.9	0.105039	0.491585	0.478169	0.415551	0.424054	0.438483
	415.745	0.749987	342.505	2232.18	814.967	62.1132	0.683833	321.349	2644.61	991.982	0.132502	0.370873	0.5423	0.392217	0.460579	0.430025
	423.427	0.739372	343.968	2338.18	860.242	67.2517	0.679923	294.717	2239.38	883.375	0.133742	0.388849	0.525149	0.400901	0.480215	0.428423
	405.378	0.721426	328.461	2231.27	856.939	51.7027	0.682252	333.973	2564.97	991.81	0.120337	0.420732	0.526642	0.403636	0.461163	0.431047
test_2021_07_16_17_38	367.471	0.748649	344.005	2182.45	797.381	62.6029	0.640648	426.603	2728.29	1225.36	0.147556	0.401105	0.545031	0.391306	0.440709	0.434568
test_2021_07_16_17_38	423.98	0.732016	357.665	2295.89	873.135	43.449	0.66134	379.16	2693.18	1113.22	0.0933293	0.415656	0.523373	0.400866	0.451382	0.430088
test_2021_07_16_17_40	450.771	0.711707	368.101	2328.61	931.972	50.3786	0.650642	294.328	2593.5	1073.97	0.102786	0.451577	0.501474	0.407073	0.452472	0.445775
	467.593	0.741894	396.367	2325.2	896.012	37.7778	0.669906	392.022	3203.56	1132.22	0.0750389	0.398701	0.531079	0.39683	0.464512	0.431052
	295.683	0.67253	326.901	2212.06	931.891	47.1111	0.709847	310.116	2571.32	952.437	0.165113	0.460836	0.50712	0.412355	0.443117	0.425823
	349.902	0.708548	412.064	2533.19	1025.76	40.1176	0.667041	510.062	3052.83	1302.4	0.108047	0.446502	0.4897	0.410442	0.441923	0.430926
	307.206	0.726884	315.748	2286.45	847.843	151.461	0.638528	336.898	2199.87	999.239	0.319025	0.432703	0.519197	0.405178	0.508554	0.431828
	408.439	0.737424	378.148	2459.52	919.274	42.0606	0.662827	455.7	2903.27	1216.91	0.0966802	0.407655	0.513157	0.399859	0.443627	0.43299
	468.23	0.742811	353.577	2217.85	827.56	59.0559	0.634527	445.228	2823.42	1280.09	0.111581	0.41395	0.533893	0.395412	0.44247	0.43925
	428.176	0.711452	355.125	2015.32	832.776	36.7647	0.666546	340.78	2675.61	1119.46	0.080637	0.436064	0.553208	0.399923	0.429875	0.441206
	367.604	0.692388	330.073	2183.01	899.863	51.6636	0.661866	351.545	3087.04	1069.63	0.158894	0.477854	0.508017	0.409996	0.46146	0.43289
	408.429	0.732689	345.404	2339.81	874.948	38.5714	0.618978	414.611	2437.84	1138.25	0.0906439	0.45069	0.522087	0.401268	0.459705	0.446065
	480.98	0.711786	375.765	2338.38	942.009	50.7047	0.653307	382.755	2792.87	1172	0.0993739	0.452894	0.508304	0.404745	0.444048	0.434549
	384.402	0.689123	318.219	2151.56	889.715	46.5607	0.662265	410.906	2633.98	1113.43	0.11666	0.482584	0.511561	0.411619	0.468629	0.430846
	398.939	0.741555	353.596	2298.72	851.69	69.0447	0.665294	360.814	2767.97	1086.66	0.134937	0.39813	0.541593	0.396937	0.470313	0.426804
	263.884	0.723513	313.695	2272.45	844.575	98.4143	0.67004	441.531	2722.87	1176.17	0.303712	0.421565	0.513743	0.404392	0.474987	0.428388
	341.959	0.698053	412.465	2566.62	1050.62	59.0524	0.661791	394.1	2663.66	1118.33	0.149637	0.464579	0.484549	0.41159	0.470647	0.428356
	454.188	0.721383	346.491	2251.19	872.66	83.0871	0.637763	396.887	2615.69	1164.22	0.144441	0.44755	0.521817	0.402681	0.457633	0.435769
	443.474	0.67447	379.345	2374.44	1030.12	48.4474	0.649298	403.209	2802.91	1179.95	0.10143	0.51209	0.484587	0.415325	0.451386	0.437347
	350.525	0.708848	355.729	2327.74	918.876	46.555	0.664239	334.201	2538.74	1032.79	0.122436	0.448365	0.506495	0.406921	0.463021	0.430967
	370.443	0.731034	345.948	2321.5	871.277	42.8302	0.680389	343.774	2505.27	1004.35	0.104644	0.401994	0.518811	0.401864	0.473131	0.433262
	411.639	0.694591	402.307	2587.42	1062.81	50.8866	0.618801	323.424	2532.05	1127.54	0.112632	0.503242	0.474976	0.413984	0.456946	0.448262
	472.934	0.702979	358.759	2327.35	942.653	76.9272	0.610597	395.961	2820.58	1316.63	0.133041	0.497663	0.498529	0.410204	0.420639	0.445379
	443.205	0.735849	368.662	2369.39	890.93	50.7949	0.64072	358.715	2338.64	1052.81	0.104047	0.420727	0.52299	0.400418	0.473098	0.438036
	440.577	0.66834	372.49	2413.92	1045.19	62.749	0.635636	426.821	2854.28	1264.26	0.120613	0.535785	0.476313	0.42023	0.431523	0.439612
	414.273	0.729289	368.719	2320.77	890.385	63.9545	0.65026	337.853	2362.95	1021.25	0.13063	0.424456	0.526287	0.402046	0.490761	0.431291
	412.811	0.745774	356.248	2253.59	826.95	48.805	0.676163	322.828	2778.2	1096.35	0.108763	0.382135	0.541236	0.392732	0.431736	0.432671
	368.799	0.733505	366.433	2400.79	904.48	48.7586	0.682584	405.139	2810.81	1106.84	0.118965	0.401661	0.519794	0.401996	0.465662	0.425962
	399.24	0.718628	363.612	2300.1	902.012	48.2489	0.650645	324.085	2649.35	1100.6	0.111495	0.444134	0.519965	0.403934	0.443467	0.439291
	479.472	0.756699	359.878	2313.22	827.406	54.0044	0.618742	392.009	2382.99	1119.38	0.0999281	0.409313	0.546108	0.390929	0.457473	0.442854
	490.316	0.742309	360.113	2302.54	856.921	57.234	0.631867	406.376	2686.23	1210.94	0.103842	0.417204	0.529709	0.397434	0.43513	0.44016
	504.777	0.738464	381.548	2368.6	897.579	55.6437	0.631331	342.451	2562.16	1101.33	0.0990419	0.42812	0.526602	0.397867	0.452883	0.44135
	406.548	0.749445	395.05	2533.91	924.26	43.5806	0.651605	269.34	2492.74	1023.37	0.101923	0.395554	0.524086	0.396488	0.450439	0.444796
	441.25	0.720895	365.282	2284.38	897.868	44.0217	0.687089	385.985	2635.02	1054.4	0.0920353	0.414138	0.52237	0.404028	0.431369	0.4344
	510.631	0.740328	358.608	2269.42	847.044	57.2575	0.652697	350.264	2431.34	1045.87	0.100103	0.407937	0.537905	0.396142	0.474622	0.431204
	438.871	0.741296	379.121	2414.43	901.144	35.6129	0.698928	310.34	2383.83	927.479	0.0758955	0.374386	0.523696	0.398294	0.46623	0.428152
	443.992	0.711614	369.467	2436.7	963.767	59.0038	0.652969	373.872	2587.93	1097.4	0.118494	0.451825	0.488362	0.408935	0.453215	0.433676
	409.577	0.715422	391.774	2340.89	945.135	35.3654	0.669454	300.635	2345.55	952.164	0.0802332	0.432719	0.51622	0.403939	0.49364	0.434296
	378.638	0.78908	373.019	2440.89	805.02	46.2979	0.653221	340.99	2528.76	1075.89	0.115796	0.331085	0.569164	0.380883	0.470041	0.438185
	446.128	0.725678	376.672	2424.2	931.889	56.4535	0.66532	260.408	2377.03	950.182	0.112415	0.420711	0.512744	0.403533	0.464404	0.440553
	420.622	0.726668	381.05	2404.4	929.07	37.9324	0.681789	327.659	2646.83	1026.53	0.0861597	0.406738	0.507941	0.403202	0.442307	0.434884
	481.21	0.725571	361.191	2338.88	898.216	42	0.64819	234.158	2233.61	905.09	0.0823816	0.432801	0.522161	0.402977	0.483156	0.440779
	517.93	0.729258	369.528	2278.45	883.211	46.5043	0.658545	351.733	2588.53	1074.35	0.0841392	0.41916	0.532177	0.400689	0.458443	0.432093
	468.833	0.716911	343.939	2357.83	914.994	49.1825	0.654571	301.844	2458.86	1025.9	0.0984285	0.44189	0.505812	0.404327	0.444653	0.438048
	448.705	0.700697	366.043	2457.03	990.378	46.865	0.674957	297.121	2467.33	975.499	0.095436	0.449176	0.489416	0.4123	0.457509	0.432906
	470.598	0.797789	362.328	2264.53	743.132	69.1732	0.647324	373.431	2735.04	1177.6	0.125227	0.319316	0.57982	0.373728	0.438326	0.436535
	490.263	0.741896	361.791	2341.2	869.15	51.6336	0.662019	288.56	2540.17	1021.74	0.0943187	0.397745	0.528608	0.396822	0.455228	0.438427
test_2021_07_30_15_18	536.061	0.763315	419.911	2465.05	898.06	48.9796	0.666718	605.95	3875.39	1615.78	0.0836579	0.363615	0.550645	0.391772	0.36742	0.440592
test_2021_07_30_15_19	472.323	0.749513	409.144	2291.21	874.654	46.6774	0.663859	591.238	3577.26	1481.08	0.0916895	0.390241	0.56927	0.392623	0.41097	0.444966
	536.583	0.781947	408.91	2428.05	845.092	51.1806	0.668382	608.681	3524.61	1479.38	0.0883425	0.336966	0.576634	0.383093	0.406229	0.447067
	513.013	0.755054	431.389	2427.05	912.906	55.6447	0.661775	559.544	3049.23	1342.05	0.0973344	0.380893	0.558324	0.394161	0.419247	0.449201
	463.163	0.739804	405.097	2333.07	899.92	56.2093	0.628826	454.508	2884.06	1317.03	0.11074	0.420627	0.557097	0.397155	0.408384	0.454406
	512.793	0.737539	417.653	2423.56	937.375	59.0096	0.632832	506.431	3136.95	1404.08	0.103877	0.428641	0.537735	0.399691	0.400325	0.454568
	467.259	0.731144	430.6	2527.14	987.542	58.9932	0.621543	465.472	2777.55	1272.51	0.114422	0.449532	0.519872	0.403562	0.434006	0.458908
	541.607	0.73778	416.712	2442.71	939.475	71.4857	0.616492	463.564	2860.79	1350.44	0.116067	0.43533	0.530896	0.398029	0.403867	0.459441
	560.748	0.709068	409.64	2412.19	986.097	62.184	0.601206	486.814	3214.09	1423.29	0.102905	0.501378	0.513398	0.408269	0.403411	0.462097
	548.766	0.755006	400.242	2286.99	855.527	55.1064	0.64055	639.989	3643.74	1585.49	0.0902267	0.391654	0.562182	0.390603	0.392866	0.454772
	529.581	0.75415	393.072	2286.47	852.362	63.2442	0.626534	542.884	3346.7	1436.46	0.105335	0.404528	0.556817	0.391096	0.413868	0.455054
	534.918	0.719215	403.647	2323.25	934.788	65.433	0.598879	594.985	3812.7	1603.77	0.108623	0.4938	0.522971	0.403367	0.392574	0.462916
	591.025	0.704309	417.608	2337.42	982.326	65.6151	0.591738	534.952	3405.24	1571.46	0.100115	0.518848	0.516437	0.408777	0.375587	0.462169
	479.615	0.694678	395.74	2443.37	1013.58	95.4796	0.592707	521.708	2950.89	1445.04	0.153714	0.531583	0.49229	0.412761	0.401292	0.463633
	546.017	0.737964	394.403	2342.9	898.53	64.9008	0.63108	420.482	2874.35	1274.1	0.104152	0.426256	0.542221	0.398634	0.415499	0.454099
	552.253	0.721376	376.3	2124.52	856.019	56.4615	0.593411	478.264	3516.78	1530.7	0.0937377	0.488836	0.559079	0.397995	0.402539	0.463801
	499.771	0.727047	390.475	2315.48	907.913	56.1503	0.636704	536.972	3488.2	1450.02	0.100973	0.440078	0.53314	0.400863	0.405605	0.45205
	545.839	0.733442	396.51	2267.91	892.113	69.2663	0.618279	490.26	3020.31	1400.43	0.112302	0.43988	0.543522	0.397945	0.409968	0.461594
	569.131	0.797868	367.191	2040.76	702.496	59.2154	0.654019	485.432	2867.63	1267.29	0.0923054	0.3162	0.625359	0.36536	0.427316	0.451702
	566.222	0.724362	400.265	2382.78	938.768	96.3407	0.6267	469.892	2769.95	1285.02	0.134929	0.450569	0.527255	0.403124	0.440812	0.454053
	516.382	0.740728	384.74	2221.56	856.634	60.4841	0.658417	452.95	2912.76	1254.61	0.105076	0.401118	0.552045	0.395184	0.432464	0.448136
	582.922	0.71696	393.422	2255.87	919.567	63.0219	0.636397	474.591	3305.34	1421.25	0.0975855	0.452702	0.53542	0.403901	0.399689	0.453398
	587.457	0.731299	368.705	2140.2	842.596	74.0472	0.60249	516.722	2930.52	1436.55	0.111271	0.457059	0.559282	0.39639	0.404604	0.463579
	559.113	0.72698	395.043	2141.83	867.027	65.4361	0.656027	462.519	2952.09	1276.85	0.103763	0.431721	0.560475	0.397915	0.435421	0.449798
	594.874	0.749357	392.903	2276.01	857.373	66.2715	0.651415	456.638	4183.16	1386.94	0.0984013	0.394406	0.557326	0.392557	0.407388	0.451114
	607.286	0.755088	385.291	2189.48	824.684	63.9221	0.626755	406.254	2737.02	1247.58	0.0936241	0.396549	0.571137	0.388462	0.422048	0.457783
	513.314	0.730458	398.212	2297.21	904.772	70.0317	0.64004	456.776	3061.99	1349.26	0.123	0.430799	0.540333	0.399798	0.412019	0.452902
	579.225	0.706016	402.322	2307.47	953.245	66.2167	0.654533	473.109	2809.73	1232.58	0.101203	0.463234	0.533413	0.408253	0.453472	0.450655
	323.804	0.593252	372.404	2323.61	1152.09	67.9018	0.609957	363.99	2621.69	1227.82	0.174511	0.686194	0.464705	0.435211	0.437557	0.462124
	502.176	0.742285	402.305	2272.37	876.285	77.4476	0.613624	399.839	2939.89	1362.18	0.130491	0.426591	0.559277	0.394489	0.39703	0.459045
	509.228	0.710358	391.199	2305.47	939.013	63.5294	0.635792	460.616	2923.79	1293.89	0.113854	0.467161	0.520515	0.407646	0.412402	0.454439
	470.931	0.734378	397.78	2185.49	871.255	54.092	0.653188	485.28	2890.75	1282.41	0.104506	0.413282	0.564748	0.396956	0.430142	0.453447
	494.41	0.756078	406.853	2316.97	866.695	68.1824	0.634693	415.47	2921.79	1274.26	0.120204	0.39741	0.562309	0.390673	0.416905	0.454647
	533.394	0.752455	399.263	2267.37	858.755	60.1468	0.593303	432.119	2895.72	1389.3	0.100752	0.431185	0.565471	0.390622	0.403098	0.46575
	516.692	0.727964	394.284	2383.02	930.466	66.3711	0.640569	420.796	2885.1	1281.09	0.114291	0.434815	0.526907	0.4023	0.419338	0.454667
	566.686	0.734896	407.91	2324.63	910.437	79.0537	0.663362	479.036	3365.55	1315.36	0.120395	0.409093	0.536488	0.399283	0.423467	0.447397
	476.306	0.751841	401.358	2323.96	871.241	63.2097	0.630875	440.849	3530.87	1287.8	0.11552	0.405918	0.556542	0.392727	0.414685	0.454987
	495.84	0.751323	371.747	2278.32	836.915	58.9877	0.655678	390.718	2898.06	1214.82	0.107217	0.387359	0.558907	0.392542	0.403238	0.450725
	491.022	0.762258	366.038	2082.29	772.371	62.4522	0.692247	420.775	2948.37	1165.93	0.116671	0.353021	0.591842	0.382809	0.433211	0.440257
	503.153	0.705656	380.625	2289.52	937.616	59.7748	0.625261	469.217	2778.02	1283.16	0.107336	0.490747	0.518424	0.408201	0.418975	0.455968
	519.827	0.77064	363.056	2103.63	761.373	58.8951	0.702402	387.04	2711.1	1044.03	0.10187	0.335886	0.599593	0.38006	0.469497	0.437265
	490.169	0.737201	380.758	2314.44	880.045	53.7987	0.644341	425.904	2797.21	1205.5	0.0994461	0.420919	0.546715	0.398188	0.435978	0.452759
test_2021_07_16_17_28	534.985	0.741415	372.854	2179.86	833.7	61.4302	0.694733	460.392	3075.55	1188.61	0.102041	0.382267	0.550514	0.393249	0.445012	0.438594
test_2021_07_16_17_29	606.979	0.730509	371.065	2208.03	860.954	72.4536	0.613443	452.117	2762.87	1298.74	0.103159	0.455642	0.544059	0.397677	0.424192	0.457984
	574.561	0.750288	400.836	2327.09	875.659	82.3355	0.616663	455.729	2797.69	1313.72	0.1199	0.4154	0.54491	0.393655	0.416957	0.456116
	457.452	0.759018	361.47	2092.18	772.5	78.6384	0.677745	410.339	2640.06	1095.87	0.173342	0.363205	0.589499	0.38292	0.463183	0.444437
	545.086	0.742088	408.056	2368.29	908.745	60.8286	0.624752	385.097	2786.82	1251.26	0.100229	0.422729	0.536683	0.397797	0.405514	0.458395
	517.868	0.741262	370.762	2173.17	829.674	56.1132	0.692735	457.524	3036.16	1175.01	0.0976904	0.382906	0.5517	0.393249	0.446031	0.439072
test_2021_07_30_15_21	538.314	0.677627	345.299	2127.14	915.796	74.7143	0.595436	618.664	3584.92	1695.92	0.119742	0.564191	0.509	0.412071	0.395856	0.442597
test_2021_07_30_15_23	527.867	0.711909	332.963	2174.27	861.658	66.8228	0.586789	514.215	3162.2	1574.29	0.111351	0.50643	0.524001	0.404536	0.407003	0.445756
	441.925	0.665536	384.793	2458.4	1070.32	68.4019	0.628988	454.879	3613.95	1470.95	0.135619	0.541477	0.471269	0.420758	0.397926	0.439759
test_2021_07_30_15_21	534.986	0.693062	347.754	2199.82	911.556	68.6284	0.603294	533.26	3491.23	1537.96	0.112851	0.525811	0.514171	0.409858	0.408001	0.444961
test_2021_07_30_15_23	515.491	0.684207	343.053	2175.12	922.646	81.4579	0.624291	424.205	2940.05	1334.9	0.136924	0.523755	0.511976	0.411482	0.428152	0.441775
	504.299	0.762116	342.47	2068.78	751.836	60.2308	0.630906	518.671	3262.04	1483.84	0.106239	0.385197	0.583441	0.381701	0.40942	0.439087
	512.655	0.734661	355.874	2151.29	826.317	71.5462	0.588624	516.483	3178.9	1542.18	0.122995	0.460053	0.543748	0.395374	0.403149	0.446222
	543.291	0.719233	346.895	2101.29	841.974	67.5116	0.615564	394.895	2834.4	1254.2	0.108623	0.476048	0.558114	0.395688	0.43863	0.43921
	563.126	0.741135	333.073	2090.33	783.641	69.1474	0.583616	584.636	3138.57	1586.7	0.109392	0.461163	0.556923	0.391767	0.410827	0.445875
	500.649	0.734456	351.118	2230.01	843.278	65.1194	0.629323	466.114	2872.33	1329.67	0.121074	0.430458	0.545787	0.397207	0.437441	0.438259
	529.532	0.750145	330.876	2137.5	777.98	63.2177	0.661064	451.9	3315.43	1349.57	0.109686	0.381595	0.56582	0.38918	0.423284	0.432739
	492.703	0.717972	340.106	2172.51	851.881	68.413	0.609731	540.876	3262.76	1539.05	0.122534	0.472652	0.53064	0.401795	0.403271	0.441798
	553.266	0.752112	336.818	2066.54	761.793	79.8047	0.563812	412.269	2688.72	1383.64	0.125631	0.452134	0.571947	0.387298	0.412081	0.451976
	513.659	0.690375	358.724	2292.62	954.36	73.2848	0.625409	490.639	3021.61	1377.85	0.12658	0.512259	0.505165	0.412176	0.433849	0.437617
	473.77	0.704229	368.475	2361.54	950.464	63.6848	0.623569	541.557	4244.82	1550.69	0.118886	0.490287	0.505887	0.407822	0.420159	0.439005
	495.879	0.729977	312.689	2033.87	774.388	79.1481	0.655714	418.692	2856.79	1217.13	0.136823	0.420549	0.561413	0.393786	0.452104	0.428464
	523.137	0.705457	339.488	2249.53	899.164	104.251	0.634346	436.056	2799.54	1271.49	0.164113	0.471912	0.506947	0.4076	0.437443	0.436756
	407.75	0.617965	374.64	2406.21	1144.33	133.911	0.61412	407.495	2876.12	1342.16	0.252244	0.629581	0.453777	0.431729	0.411867	0.441431
	508.906	0.692146	357.489	2309.27	956.563	64.2704	0.634784	419.648	3058.2	1344.24	0.112462	0.497778	0.505749	0.411721	0.413295	0.437635
	501.461	0.702112	344.725	2246.43	904.642	70.7152	0.559701	461.531	2800.96	1471.44	0.125024	0.544763	0.516131	0.407712	0.402898	0.453739
	415.513	0.731838	353.423	2242.04	857.123	67.1795	0.591783	428.863	2865.95	1378.6	0.140002	0.473112	0.538124	0.398404	0.417671	0.445335
test_2021_07_16_17_31	542.674	0.770387	338.137	2126.05	745.383	74.8261	0.63035	388.921	3020.47	1194.48	0.117886	0.372091	0.58225	0.381033	0.44855	0.437136
test_2021_07_16_17_33	470.189	0.74886	335.388	2138.23	781.985	63.6333	0.666483	422.746	2868.78	1219.91	0.122014	0.382139	0.569103	0.389795	0.453784	0.432076
	296.669	0.6822	341.087	2301.08	956.782	60	0.704039	404.664	2667.42	1043.74	0.17614	0.458816	0.49447	0.414816	0.497172	0.419085
	422.99	0.730979	351.564	2235.51	855.514	68.9212	0.592734	430.106	2855.56	1372.43	0.140303	0.473735	0.538023	0.398658	0.419076	0.444905
test_2021_07_30_15_26	400.082	0.793381	415.737	2684.87	882.289	60.8767	0.57871	552.555	3272.78	1637.19	0.134764	0.369313	0.546636	0.381371	0.391077	0.448813
test_2021_07_30_15_28	494.958	0.739194	378.357	2267.6	866.287	74.7327	0.623348	495.661	3048.99	1393.19	0.129088	0.432412	0.546331	0.396969	0.430766	0.439977
	425.097	0.678011	397.449	2425.92	1039.89	66.2911	0.601085	446.643	2993.04	1431.71	0.136258	0.546346	0.492479	0.416308	0.407798	0.443091
	428.429	0.705459	411.131	2447.3	1006.49	55.551	0.615407	601.891	3102.56	1517.33	0.118313	0.499838	0.497653	0.409683	0.418811	0.441895
test_2021_07_30_15_26	451.138	0.730658	422.251	2428.91	957.744	59.931	0.617381	429.766	2746.65	1287.57	0.119466	0.443603	0.520693	0.40293	0.422157	0.44059
test_2021_07_30_15_28	449.361	0.729007	419.19	2583.65	998.22	64.4694	0.60304	450.499	2898.47	1366.34	0.126546	0.472275	0.508449	0.403538	0.42219	0.441886
	448.583	0.741259	410.82	2527.49	953.416	62.035	0.600494	445.602	2933.54	1403.64	0.124527	0.441534	0.521203	0.39931	0.42194	0.445757
	372.149	0.738602	348.599	2080.7	795.217	60.9505	0.62907	376.232	2988.86	1252.16	0.144912	0.425536	0.556681	0.391767	0.426084	0.440166
	407.146	0.737098	354.78	2255.19	849.669	80.5073	0.621175	392.893	2717.55	1248.99	0.156235	0.434689	0.536598	0.398074	0.44087	0.440918
	463.339	0.727089	379.454	2301.91	899.612	91.9474	0.623562	402.087	2800.24	1279.57	0.158149	0.444011	0.533932	0.402509	0.436911	0.442458
	389.743	0.748257	353.999	2139.66	798.845	63.6714	0.634535	427.655	2949.65	1306.97	0.142565	0.405513	0.565805	0.389329	0.42473	0.435869
	444.823	0.711948	393.747	2412.94	969.638	68.3058	0.62221	410.286	2762.47	1264.58	0.132096	0.480895	0.510274	0.407256	0.441911	0.439376
	496.055	0.789048	351.98	2089.83	716.436	69.9509	0.709578	409.591	2719.24	1058.02	0.124607	0.302728	0.613698	0.369597	0.489045	0.415143
	371.186	0.752802	370.01	2216.57	820.076	59.1863	0.63585	329.595	2502.49	1093.3	0.137388	0.396827	0.570297	0.387953	0.457263	0.440318
	425.472	0.708526	394.194	2413.68	978.927	63.1147	0.646862	364.776	2734.82	1173.63	0.129601	0.46695	0.514609	0.406411	0.444466	0.436371
	467.441	0.724076	389.466	2360.53	927.954	70.2992	0.622682	387.905	2733.37	1248.55	0.130523	0.453022	0.529437	0.403046	0.439416	0.440414
test_2021_07_30_15_31	416.56	0.762944	390.282	2367.45	852.53	68.7892	0.639818	385.096	2747.12	1210.26	0.141115	0.385585	0.560768	0.38803	0.442768	0.434059
test_2021_07_30_15_32	437.738	0.66912	400.295	2497.71	1087.75	93.1133	0.660338	536.757	3336.65	1444.96	0.185248	0.522924	0.490188	0.418098	0.429745	0.428427
test_2021_07_30_15_31	552.185	0.740815	367.456	2201.98	839.353	79.7333	0.656998	526.104	3083.88	1374.93	0.125767	0.40105	0.557218	0.394829	0.450016	0.431843
test_2021_07_30_15_32	608.959	0.75743	372.411	2180.75	807.127	75.5537	0.669689	537.747	3116.29	1356.75	0.110084	0.366535	0.572737	0.387557	0.458235	0.428525
	434.56	0.667588	399.591	2503.83	1091.99	93.9267	0.660375	534.207	3324.64	1440.5	0.187572	0.525452	0.488683	0.418558	0.430665	0.428473
	594.167	0.767739	371.182	2314.15	817.593	69.6154	0.634959	468.41	2924.98	1336.66	0.105689	0.374124	0.56814	0.386274	0.440757	0.436486
	583.149	0.758739	375.185	2296.63	836.422	69.4359	0.638817	469.28	2961.23	1346.45	0.106009	0.383439	0.559108	0.389432	0.43434	0.436303
	649.396	0.761726	383.064	2283.1	832.943	77.6447	0.621896	474.236	2974.54	1383.71	0.106434	0.390629	0.561209	0.388424	0.429033	0.438532
	640.877	0.756435	384.599	2298.35	847.615	97.1321	0.711192	461.671	2819.62	1113.83	0.131938	0.348397	0.558221	0.3909	0.49822	0.412741
	665.076	0.747419	396.036	2324.34	879.309	76.1902	0.660833	510.826	3292.37	1298.59	0.101306	0.391863	0.547769	0.394892	0.459142	0.427906
	594.405	0.744347	388.389	2378.96	893.627	77.5227	0.681847	460.226	2990.75	1225.43	0.111251	0.38134	0.538772	0.396493	0.455416	0.425019
	594.502	0.75567	402.845	2336.65	871.465	73.4312	0.643813	409.76	2948.39	1240.31	0.112091	0.387668	0.552297	0.391837	0.439388	0.434066
	594.502	0.75567	402.845	2336.65	871.465	73.4312	0.643813	409.76	2948.39	1240.31	0.112091	0.387668	0.552297	0.391837	0.439388	0.434066
test_2021_07_30_15_34	419.452	0.771771	396.481	2470.94	867.183	65.2877	0.705426	439.043	2929.39	1142.14	0.13495	0.326364	0.565642	0.386327	0.484919	0.416692
test_2021_07_30_15_37	447.694	0.738737	421.098	2485.95	953.936	71.8553	0.634694	409.606	2776.78	1236.46	0.141017	0.424118	0.531532	0.398556	0.444193	0.436504
test_2021_07_30_15_37	457.92	0.768252	402.957	2421.06	869.401	59.08	0.649196	368.641	2680.93	1148.68	0.118011	0.36489	0.559301	0.386317	0.454352	0.434756
	537.247	0.794136	405.692	2376.96	807.091	120.236	0.680816	378.525	2590.33	1061.85	0.162714	0.30879	0.584856	0.375377	0.492576	0.421292
	424.527	0.773642	379.018	2279.89	804.074	62.1909	0.666823	394.705	2694.52	1135.97	0.135129	0.344384	0.579386	0.383163	0.461919	0.431066
	477	0.772905	402.721	2358.64	841.848	85.4127	0.643711	333.288	2706.23	1144.9	0.140639	0.357035	0.569734	0.385298	0.437431	0.434968
	496.068	0.771048	384.211	2267.28	810.27	58.5085	0.628895	363.38	2622.79	1154.9	0.109625	0.375211	0.584615	0.382254	0.442375	0.438504
	511.23	0.750755	402.01	2323.09	874.114	73.6832	0.606709	383.408	2533.17	1206.75	0.127446	0.419101	0.553216	0.391552	0.444716	0.442018
	379.557	0.76001	375.811	2363.52	842.132	115.354	0.694847	411.814	2876.95	1147.47	0.233597	0.347377	0.561587	0.390155	0.46094	0.423785
	456.818	0.767336	396.947	2421.84	862.252	76.1636	0.659864	359.458	2591.22	1104.96	0.146186	0.358979	0.555592	0.387981	0.468135	0.431977
	398.844	0.619495	451.724	2479.68	1217.8	162.073	0.693731	349.198	2410.88	969.761	0.286005	0.551233	0.465766	0.430767	0.503324	0.421932
	387.071	0.742977	395.076	2340	889.231	101.976	0.711355	371.178	2607.37	992.631	0.19574	0.368708	0.549871	0.393267	0.503075	0.415438
	417.456	0.682563	406.994	2420.12	1046.02	107.265	0.666973	410.912	2791.27	1165.65	0.186063	0.480279	0.510204	0.411024	0.471403	0.43152
	350.096	0.732574	390.624	2520.28	954.345	84.5674	0.690075	298.752	2374.71	926.942	0.21055	0.389072	0.51997	0.401036	0.492531	0.425385
	398.844	0.619495	451.724	2479.68	1217.8	162.073	0.693731	349.198	2410.88	969.761	0.286005	0.551233	0.465766	0.430767	0.503324	0.421932
test_2021_07_30_15_39	552.766	0.730875	411.524	2531.75	982.199	63.4894	0.655907	505.076	3191.86	1411.65	0.101995	0.417058	0.522896	0.400632	0.430792	0.435176
test_2021_07_30_15_41	467.267	0.757667	368.259	2188.48	805.77	63.7708	0.677958	350.309	2711.03	1094.86	0.12063	0.36216	0.573976	0.387617	0.454022	0.431766
	453.618	0.74752	352.654	2248.02	826.411	58.382	0.662604	345.844	2727.18	1111.52	0.114912	0.389611	0.554159	0.393207	0.45786	0.432177
	496.482	0.726624	381.7	2363.67	920.48	66.2622	0.652876	360.585	2668.29	1131.79	0.119275	0.426122	0.523581	0.402932	0.455101	0.436101
	507.318	0.757293	373.397	2367.03	855.827	68.293	0.647511	368.726	2576.24	1124.35	0.123107	0.382902	0.544421	0.391577	0.464571	0.434141
	496.207	0.728383	379.538	2227.73	876.055	65.9669	0.657883	360.176	2805.38	1159.05	0.120071	0.423111	0.54439	0.397896	0.434624	0.436049
	562.568	0.745007	381.61	2269.13	860.147	80.7386	0.625835	356.649	2815.9	1252.26	0.121788	0.412036	0.557079	0.394435	0.433207	0.441637
	439.719	0.728061	393.713	2498.2	958.726	56.5263	0.673025	381.29	2776.46	1138.25	0.117121	0.409691	0.518261	0.403147	0.459707	0.431569
	498.968	0.742346	379.257	2313.77	873.993	66.7615	0.705245	381.84	2683.77	1050.45	0.119399	0.368661	0.544443	0.397078	0.492118	0.418852
	574.233	0.763748	372.422	2331.59	828.823	68.1111	0.654622	306.051	2683.42	1111.01	0.108076	0.362696	0.552584	0.388012	0.437564	0.437273
	511.098	0.750103	408.446	2444.62	917.393	62.6848	0.655463	297.688	2662.27	1099.7	0.112131	0.382988	0.540383	0.393203	0.442708	0.439617
	403.658	0.743351	397.209	2497.9	933.508	55.1316	0.691808	306.763	2625.28	1010.85	0.12256	0.376273	0.532223	0.397354	0.458974	0.429126
	488.984	0.717499	410.53	2377.66	964.682	66.1868	0.645636	376.94	2738.82	1178.16	0.120306	0.447657	0.526245	0.403473	0.451955	0.43624
	498.976	0.752665	356.669	2268.34	821.763	59.4724	0.673522	302.216	2609.59	1026.97	0.106581	0.376705	0.554615	0.39097	0.459635	0.433669
	553.742	0.76055	374.873	2228.88	816.876	72.6701	0.637929	353.311	2680.01	1167.68	0.116429	0.38219	0.563085	0.387234	0.449457	0.438634
	508.887	0.745557	366.75	2168.04	818.871	67.9308	0.628713	347.254	2755.02	1212.91	0.122777	0.409268	0.565028	0.391209	0.425705	0.442243
	486.948	0.750035	399.243	2435.59	907.416	65.893	0.718769	405.891	2729.92	1039.85	0.121944	0.352535	0.546454	0.392569	0.49814	0.415548
	494.484	0.747633	375.585	2283.76	855.894	62.6989	0.638415	355.389	2695.27	1172.95	0.12101	0.404082	0.557144	0.392417	0.44175	0.43885
	488	0.785979	392.1	2402.45	815.464	58.9535	0.606908	435.27	2741.22	1312.76	0.111494	0.358758	0.571516	0.380606	0.456852	0.446043
	501.807	0.755713	382.686	2389.24	868.848	84.1429	0.622536	363.547	2738.89	1255.62	0.140294	0.398626	0.542355	0.391267	0.429825	0.443792
	451.585	0.695699	367.432	2473.08	1003.83	97.4151	0.681537	347.313	2530.66	1035.85	0.174815	0.448686	0.488991	0.414587	0.471831	0.425413
	451.277	0.718257	386.49	2482.86	977.509	45.234	0.646217	450.377	2720.34	1196.71	0.0939767	0.444017	0.506032	0.406296	0.456801	0.436941
	419.453	0.721519	356.416	2107.42	838.31	52.6533	0.638592	326.856	2448.22	1051.7	0.118985	0.44847	0.546543	0.398249	0.446159	0.436056
	494.279	0.748493	396.125	2404.72	896.855	57.8525	0.656427	440.775	2825.38	1225.87	0.10442	0.392191	0.535833	0.396063	0.442237	0.434869
	386.29	0.735523	394.234	2447.71	930.351	44.84	0.708821	411.437	3135.54	1144.17	0.112706	0.380321	0.524478	0.400473	0.454248	0.422599
	451.015	0.738972	383.332	2463.54	922.617	53.0909	0.663913	377.937	2630.05	1097.4	0.111031	0.401642	0.522328	0.400746	0.462621	0.430451
	432.051	0.740089	392.15	2465.58	925.502	57.7883	0.652556	302.312	2515.51	1039.29	0.116419	0.407618	0.524558	0.398594	0.457557	0.435324
test_2021_07_16_17_35	428.286	0.75248	336.315	2225.71	799.14	66.3175	0.671815	518.293	3327.56	1279.58	0.134347	0.380554	0.546082	0.391902	0.464118	0.425005
test_2021_07_16_17_36	373.384	0.682851	343.955	2276.88	952.086	67.8805	0.676407	459.169	3076.88	1240.05	0.155388	0.479085	0.497194	0.414933	0.452935	0.425836
	502.741	0.708903	334.917	2230.75	883.965	76.6678	0.639367	432.606	2846.49	1256.8	0.122714	0.467048	0.5173	0.407304	0.440486	0.439193
	476.136	0.738515	350.87	2314.76	858.809	58.7006	0.624333	447.566	2891.89	1261.93	0.116163	0.436377	0.519143	0.398273	0.456078	0.438888
	425.491	0.718638	352.729	2304.31	896.74	42.6293	0.673278	405.617	2946.59	1184.5	0.0924839	0.427395	0.512147	0.40541	0.432581	0.431772
	412.24	0.744015	334.409	2213.51	809.845	46.3854	0.650186	382.362	2858.41	1207.84	0.102176	0.406167	0.54131	0.394155	0.442109	0.437729
	323.809	0.73417	300.049	2197.07	798.165	117.49	0.60334	530.015	2832.94	1385.86	0.292019	0.454324	0.520501	0.400705	0.438182	0.4445
	494.229	0.726882	329.312	2271.46	857.183	51.5904	0.61973	426.478	2696.54	1243.77	0.0927378	0.454094	0.519173	0.403854	0.426885	0.444
	360.397	0.701255	297.47	2364.85	911.223	121.562	0.661117	373.096	2631.82	1107.83	0.249781	0.458445	0.480614	0.415741	0.460984	0.429976
	468.413	0.731687	363.382	2383.46	901.993	89.7844	0.612284	440.135	2840.65	1310.97	0.150404	0.45127	0.50944	0.401712	0.442114	0.44283
	392.976	0.718501	349.04	2366.51	908.365	47.6855	0.660969	349.51	2819.06	1143.14	0.112759	0.437169	0.507494	0.405458	0.45047	0.433555
	350.443	0.69895	320.479	2210.43	888.762	56.9195	0.649932	329.426	2589.51	1079.7	0.145096	0.47647	0.509967	0.408234	0.448747	0.437799
	365.555	0.767051	319.256	2151.61	742.314	51.4688	0.667156	428.346	2858.17	1101.31	0.12641	0.362903	0.554114	0.386402	0.472687	0.430896
	449.112	0.770949	278.373	1940.52	655.772	90.7414	0.676706	341.907	2395.79	977.709	0.164837	0.345686	0.570873	0.37879	0.489568	0.422441
	446.558	0.752493	307.964	2091.73	744.08	54.2093	0.661042	384.875	2870.18	1145.79	0.109147	0.385731	0.548302	0.389743	0.439027	0.43197
	444.493	0.706419	317.254	2259.98	884.09	66.6458	0.628039	372.063	2610.72	1181.01	0.130766	0.477161	0.507944	0.409586	0.444735	0.444958
	414.084	0.738566	325.904	2236.63	819.595	55.5	0.633881	413.675	2846.24	1203.98	0.12056	0.423731	0.528194	0.397374	0.434747	0.436544
	484.345	0.753442	315.124	2144.42	762.153	64.1491	0.652063	371.672	2423.13	1045.5	0.117339	0.388883	0.550035	0.390615	0.478351	0.430328
	412.856	0.722721	331.79	2322.44	885.309	86.5609	0.614216	446.511	2702.91	1273.52	0.172857	0.459922	0.515353	0.403427	0.458919	0.442422
	480.573	0.701583	341.078	2290.85	924.172	60.5092	0.618859	423.513	2643.88	1227.58	0.11437	0.499815	0.508163	0.409019	0.443763	0.447257
	488.898	0.684727	331.454	2350.27	963.822	65.3234	0.691845	427.396	2934.72	1129.12	0.117152	0.470499	0.482424	0.418467	0.45862	0.424004
	468.381	0.739415	331.726	2124.11	797.037	53.8475	0.663923	348.637	2715.74	1108.7	0.100888	0.404008	0.547971	0.395715	0.444294	0.433383
	490.008	0.750939	307.033	2061.99	738.719	60.8271	0.634307	377.023	2436.55	1097.93	0.111191	0.403143	0.553469	0.389317	0.466871	0.435986
	403.508	0.733219	314.665	2194.44	812.609	44.8	0.651394	379.899	2642.37	1124.28	0.104325	0.419428	0.517131	0.400091	0.458847	0.435168
	480.806	0.724969	342.01	2216.98	852.796	56.086	0.652426	366.984	2665.24	1130.72	0.102892	0.434861	0.528886	0.401186	0.456759	0.43407
	433.11	0.707169	343.645	2464.83	961.785	55.7073	0.644306	406.791	2456.7	1018.67	0.115139	0.471928	0.491136	0.412588	0.467766	0.430331
	409.241	0.70623	323.075	2147.16	852.784	56.3459	0.6379	319.616	2462.06	1056.4	0.124114	0.468688	0.523264	0.405644	0.453553	0.43969
	340.345	0.72215	350.962	2247.66	872.971	48.5287	0.658354	360.154	2631.46	1074.14	0.132092	0.429701	0.529243	0.402853	0.466737	0.431663
	472.312	0.707623	346.787	2285.29	909.477	75.7922	0.612062	349.113	2509.97	1128.6	0.131179	0.491619	0.503817	0.408111	0.468752	0.440625
	440.272	0.688045	350.751	2274.28	945.617	56.8587	0.657855	281.966	2394.23	981.175	0.110942	0.484749	0.510504	0.413027	0.466333	0.434859
	380.231	0.709375	351.519	2372.04	934.177	67.7051	0.672627	316.296	2513.74	991.606	0.15335	0.441618	0.503903	0.408593	0.472023	0.423383
	455.427	0.756532	339.79	2317.1	817.264	62.8141	0.620164	387.876	2854.34	1199.75	0.123621	0.402726	0.53139	0.393242	0.44328	0.4382
	445.941	0.720688	347.265	2445.05	930.84	49.8713	0.651085	333.775	2620.47	1078.16	0.104205	0.437508	0.498911	0.405998	0.446215	0.433559
	443.509	0.70819	348.311	2336.45	926.537	86.4312	0.649987	327.939	2331.39	1005.91	0.145851	0.459009	0.506965	0.408698	0.479155	0.436167
	376.837	0.762267	322.603	2094.73	740.461	55.5	0.657851	311.205	2309.59	962.094	0.127531	0.366963	0.563815	0.385365	0.471692	0.433049
	430.649	0.741043	342.075	2313.35	849.651	64.9272	0.682328	301.369	2290.73	899.477	0.128534	0.384649	0.527976	0.399699	0.476246	0.428477
	405.378	0.721426	328.461	2231.27	856.939	51.7027	0.682252	333.973	2564.97	991.81	0.120337	0.420732	0.526642	0.403636	0.461163	0.431047
test_2021_07_16_17_38	367.471	0.748649	344.005	2182.45	797.381	62.6029	0.640648	426.603	2728.29	1225.36	0.147556	0.401105	0.545031	0.391306	0.440709	0.434568
test_2021_07_16_17_40	334.319	0.684675	319.701	2211.73	904.472	47.8261	0.719002	332.71	2524.96	932.716	0.152715	0.436982	0.509403	0.410366	0.456757	0.421264
	349.902	0.708548	412.064	2533.19	1025.76	40.1176	0.667041	510.062	3052.83	1302.4	0.108047	0.446502	0.4897	0.410442	0.441923	0.430926
	415.845	0.741232	379.405	2469.17	915.099	41.4483	0.663734	465.846	2906.52	1217.06	0.093724	0.402284	0.51374	0.398231	0.441244	0.432913
	468.962	0.725062	347.498	2028.53	805.271	47.566	0.678616	360.462	2621.94	1081.9	0.0959814	0.408948	0.551742	0.395533	0.448498	0.434928
	410.257	0.725106	396.61	2387.61	936.925	40.7822	0.694027	297.338	2631.25	999.466	0.0946394	0.399102	0.52384	0.403413	0.444056	0.433893
	429.833	0.742269	345.356	2337.46	855.428	37.9583	0.614992	443.952	2395.75	1142.54	0.0838122	0.441449	0.528263	0.398542	0.461161	0.44529
	352.274	0.651685	343.132	2355.05	1047.22	110.298	0.666182	309.079	2395.77	986.913	0.214265	0.530319	0.473188	0.424127	0.474235	0.430345
	486.06	0.72672	363.001	2228.23	872.568	47.4881	0.659319	399.577	2890.95	1204.91	0.0907296	0.423519	0.53169	0.39752	0.433329	0.433058
	266.894	0.722362	315.865	2277.25	850.011	95.981	0.669208	436.637	2727.14	1176.41	0.295449	0.423613	0.51316	0.404815	0.474193	0.428885
	395.074	0.741792	353.738	2298.27	851.154	69.0852	0.666301	361.668	2768.03	1084.47	0.135589	0.3967	0.542224	0.396794	0.470702	0.426578
	397.407	0.681741	327.179	2163.12	911.886	52.4915	0.631964	374.107	3029.22	1130.28	0.123872	0.519545	0.504375	0.412959	0.4683	0.436703
	495.12	0.750849	353.365	2200.82	815.234	38.16	0.677721	377.17	2767.51	1107.91	0.0723725	0.379486	0.546601	0.392174	0.452943	0.428078
	414.981	0.749175	357.796	2221.67	817.302	50.8137	0.662744	437.334	2694.47	1160.34	0.109194	0.387229	0.552434	0.390927	0.450369	0.433554
	434.95	0.692716	368.733	2259.44	947.919	54.1493	0.629842	361.302	2576.29	1146.33	0.115108	0.497802	0.511566	0.408319	0.460634	0.440858
	421.837	0.716853	342.465	2334.96	904.35	62.3901	0.696945	348.497	2394.04	972.218	0.126531	0.41702	0.500273	0.405286	0.483875	0.419489
	376.791	0.761743	384.968	2396.63	859.02	46.287	0.630799	362.218	2559.5	1124.8	0.1119	0.390173	0.545737	0.391171	0.447003	0.44164
	406.892	0.749884	366.519	2298.53	842.51	57.7848	0.64915	320.205	2572.13	1070.99	0.127744	0.393684	0.547839	0.393293	0.454477	0.439022
	445.158	0.715634	352.087	2323.5	907.214	71.9379	0.6294	372.409	2554.02	1143	0.132106	0.462555	0.508992	0.406333	0.462999	0.437862
	357.791	0.709803	358.667	2324.92	919.042	46.953	0.650684	314.342	2457.9	1016.7	0.120216	0.459623	0.505179	0.406226	0.463199	0.432208
	355.81	0.726801	341.564	2298.91	870.435	40.5833	0.683245	321.27	2482.86	987.594	0.104125	0.406171	0.518825	0.402745	0.475389	0.43522
	434.027	0.739665	369.417	2392.63	889.911	50.0909	0.64923	369.09	2462.16	1055.55	0.104394	0.409618	0.521488	0.399779	0.470319	0.435373
	417.339	0.686325	394.715	2566.28	1069.55	56.9587	0.617657	364.878	2614.47	1193.25	0.120997	0.517275	0.470191	0.416354	0.451786	0.449093
	463.051	0.709185	346.695	2307.45	916.228	93.5506	0.607942	396.417	2737.59	1290.73	0.155739	0.49053	0.501463	0.408349	0.428248	0.445396
	454.333	0.670757	371.846	2384.89	1030.69	67.4708	0.636522	414.02	2819.67	1248.01	0.123066	0.530778	0.48058	0.419156	0.42999	0.437674
	415.049	0.726477	365.516	2312.6	890.954	66.459	0.651494	343.02	2358.17	1018.16	0.134984	0.42842	0.525455	0.40271	0.492802	0.429835
	368.8	0.733584	366.517	2400.68	904.376	48.6514	0.68268	403.064	2805.57	1103.94	0.118715	0.40143	0.519849	0.401983	0.465502	0.426148
	338.958	0.726231	411.695	2606.65	1007.63	44.2083	0.675922	425.937	2718	1160.05	0.122517	0.408892	0.503367	0.405928	0.454124	0.433055
	478.186	0.754244	361.653	2308.63	833.309	52.7724	0.626969	390.194	2506.01	1146.81	0.0990273	0.405585	0.543772	0.392045	0.448775	0.441377
	455.643	0.753545	394.632	2438.06	892.605	63	0.659046	363.119	2495.04	1063.17	0.1259	0.379778	0.536813	0.394774	0.474126	0.435224
	470.074	0.743294	368.031	2366.83	875.948	55.0273	0.634294	357.806	2605.39	1148.41	0.104809	0.41498	0.527118	0.397295	0.442878	0.443471
	492.841	0.73282	379.934	2368.63	909.011	56.5552	0.637243	345.623	2573.98	1099.77	0.102738	0.432647	0.521518	0.399881	0.454186	0.440657
	422.94	0.712862	359.921	2256.33	900.954	40.4167	0.689151	459.544	2775.81	1153.02	0.0909627	0.423043	0.519185	0.40605	0.433257	0.432477
	500.534	0.740076	359.944	2281.13	852.207	57.0777	0.646818	362.149	2408.76	1060.45	0.101579	0.412003	0.535915	0.396699	0.469456	0.432842
	396.557	0.751684	324.276	2277.12	804.31	98.8523	0.659391	323.23	2901.9	1061.83	0.208339	0.385437	0.524232	0.395071	0.449005	0.435915
	436.62	0.72875	387.984	2394.24	928.157	37.3261	0.685525	306.27	2429.15	945.485	0.0796548	0.404012	0.51924	0.401212	0.4857	0.42845
	428.494	0.705386	372.751	2470.89	987.94	57.8523	0.650725	380.018	2575.2	1107.8	0.12141	0.463795	0.482026	0.41162	0.454429	0.434272
	378.638	0.78908	373.019	2440.89	805.02	46.2979	0.653221	340.99	2528.76	1075.89	0.115796	0.331085	0.569164	0.380883	0.470041	0.438185
	441.345	0.716695	373.249	2411.43	944.698	57.2538	0.662067	292.461	2400.6	988.708	0.11434	0.434902	0.505811	0.405861	0.465024	0.438722
	482.669	0.729764	373.768	2320.86	895.664	42.8698	0.673572	346.193	2584.76	1032.37	0.0840498	0.410409	0.523683	0.40094	0.456434	0.430645
	461.033	0.713959	359.931	2340.78	920.104	40.5695	0.664916	237.634	2261.71	883.03	0.0830925	0.437767	0.511614	0.406348	0.481583	0.43672
	457.78	0.743468	361.818	2284.28	849.615	59.1743	0.648065	282.496	2343.13	993.325	0.10851	0.405228	0.534073	0.396638	0.460661	0.444656
	486.264	0.730031	339.838	2325.09	875.447	48	0.649043	300.533	2495.47	1040.76	0.0924725	0.426883	0.516576	0.400264	0.444915	0.438363
	447.679	0.689336	373.478	2550.56	1047.82	48.8395	0.679056	318.972	2503.61	996.928	0.0989809	0.461732	0.473251	0.417399	0.459649	0.431302
	470.598	0.797789	362.328	2264.53	743.132	69.1732	0.647324	373.431	2735.04	1177.6	0.125227	0.319316	0.57982	0.373728	0.438326	0.436535
